# Supplementary material for: Elucidation of the mechanism of melamine adsorption on Pt(111) surface via density functional theory calculations
Source: Royal Society of Chemistry journal article supplement (doi:10.1039/d3cp01777j), 2023-01-01
Supplement: d3cp01777j1.pdf [file d3cp01777j1.pdf]

## Elucidation of the mechanism of melamine adsorption on Pt(111) surface via density functional theory calculations

Kohei Tada<sup>#</sup>, Shin-ichi Yamazaki, Masafumi Asahi, Tsutomu Ioroi

*Research Institute of Electrochemical Energy (RIECEN), Department of Energy and Environment, National Institute of Advanced Industrial Science and Technology (AIST), 1-8-31 Midorigaoka, Ikeda, Osaka 563-8577, Japan*

# Phone: +81-72-751-8566; Fax: +81-72-751-9714; Email: k-tada@aist.go.jp

### Table of Contents

|                                                                                     |            |
|-------------------------------------------------------------------------------------|------------|
| ● Calculated models for potential energy mapping: Figures S1–S5                     | p. 2–6     |
| ● Calculated potential energy maps: Figures S6–S22                                  | p. 7–23    |
| ● Initial structure information (table of entries): Table S1                        | p. 24      |
| ● Initial and optimised adsorption structures: Figures S23–S85                      | p. 25–87   |
| ● Calculated energies of the optimised structures: Tables S2 and S3                 | p. 88, 89  |
| ● Energy distribution of the $E_{\text{chem}}$ : Figure S86                         | p. 90      |
| ● Correlations of energies with $E_{\text{ads}}$ : Figure S87                       | p. 91      |
| ● Comparison of B-1 and B-2 structures: Figure S88                                  | p. 92      |
| ● Projected density of states of Types A, C, and D: Figures S89–S92                 | p. 93–95   |
| ● Electron density distribution of melamine: Figure S92                             | p. 96      |
| ● Molecular orbitals of melamine: Figure S93                                        | p. 97      |
| ● Brief explanation of NBO analysis: Figure S94                                     | p. 98      |
| ● Contribution of non-Lewis structure and lone pair occupancy by NBO: Figure S95    | p. 99      |
| ● Atomic charges of melamine: Figure S96                                            | p. 100     |
| ● Adsorption angles for the diamino-triazine and amino-triazine molecules: Table S4 | p. 101     |
| ● Cartesian coordinates of optimised models: Table S5–S11                           | p. 102–157 |

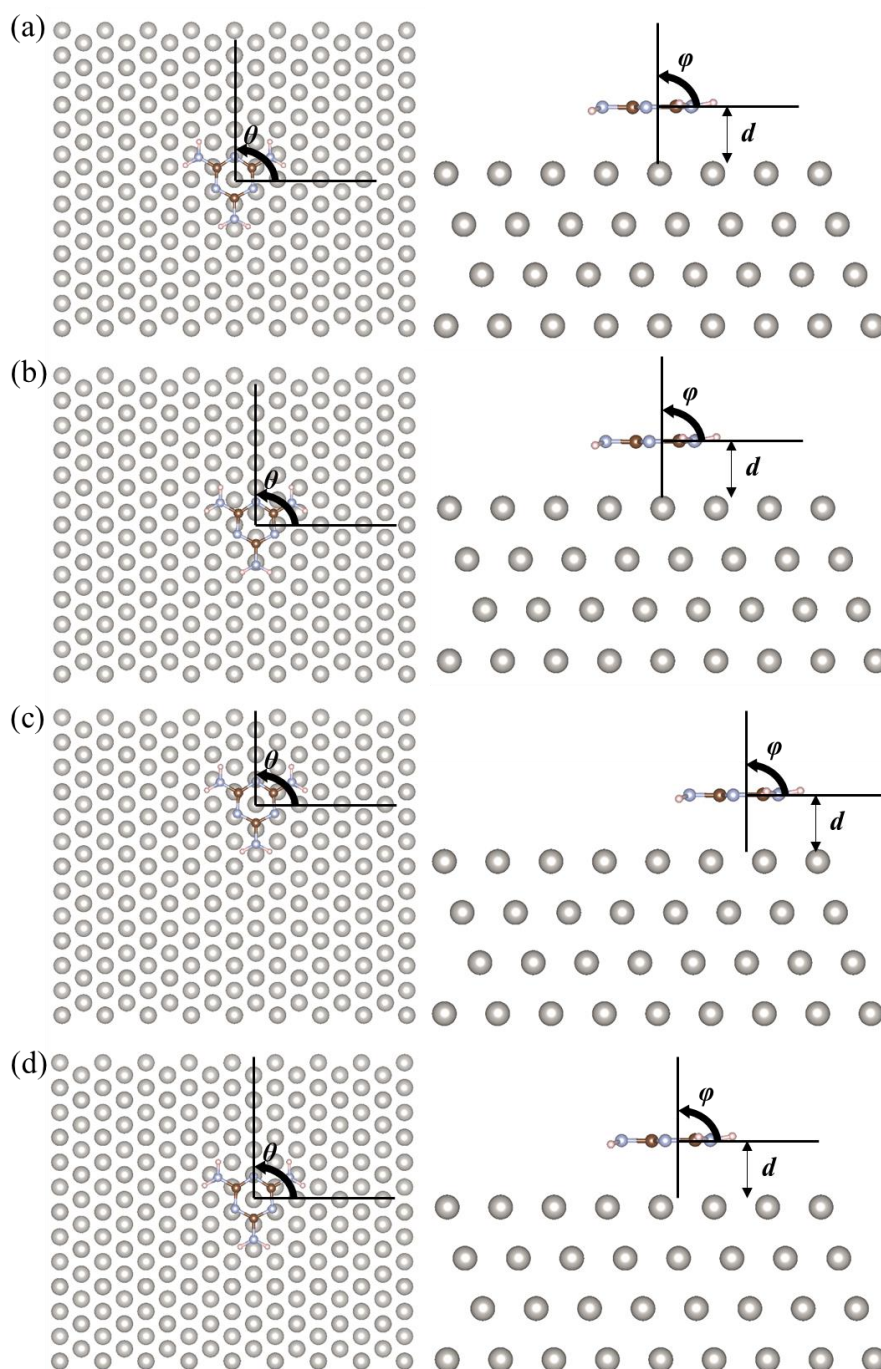

**Figure S1.** Top (left) and side (right) views of the models for estimating the potential energy map of melamine adsorption on Pt(111) surface: (a) group 1, (b) group 2, (c) group 3, and (d) group 4. The grey, brown, blue, and white balls represent Pt, C, N, and H atoms, respectively.

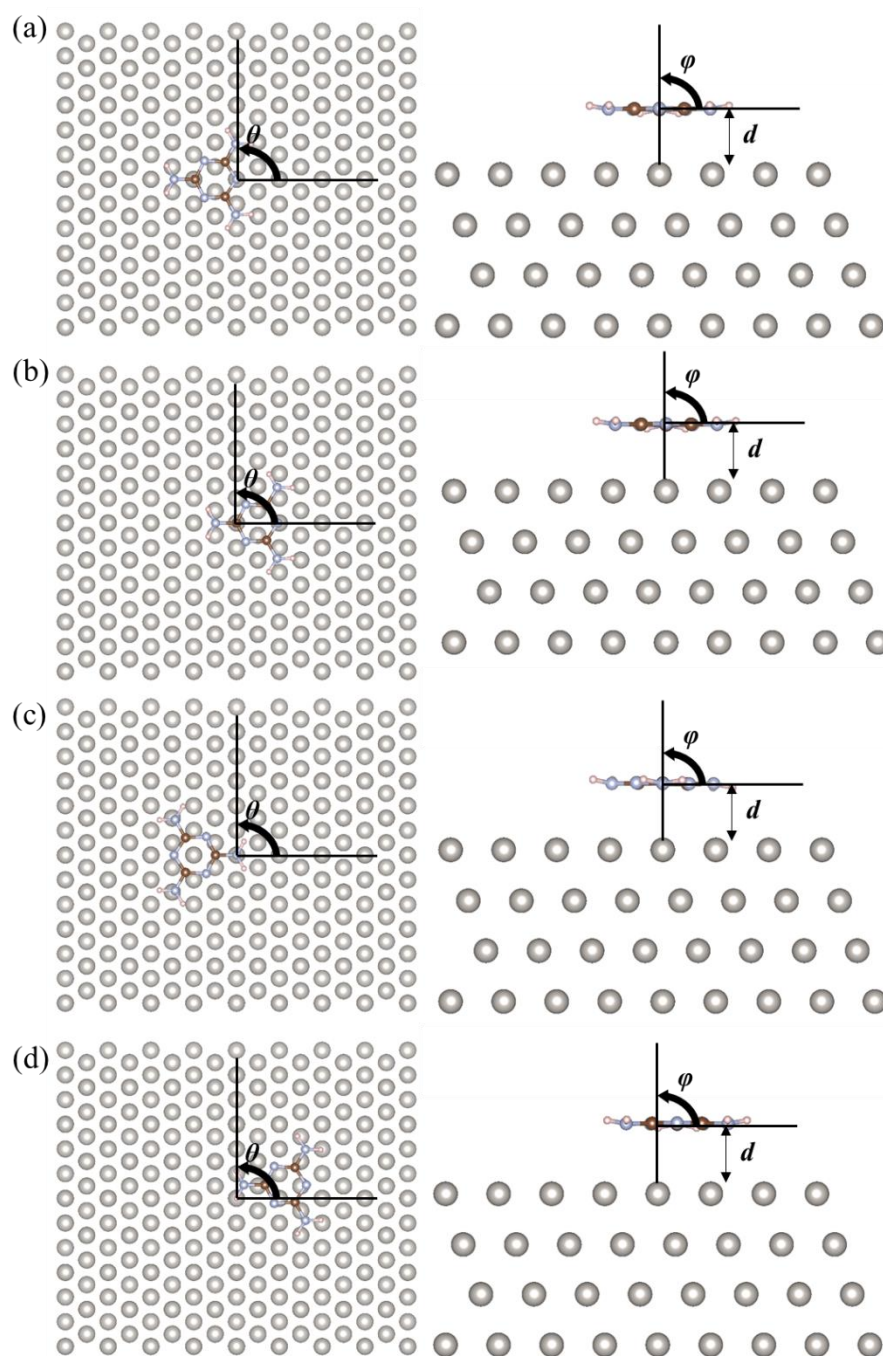

**Figure S2.** Top (left) and side (right) views of the models for estimating the potential energy map of melamine adsorption on Pt(111) surface: (a) group 5, (b) group 6, (c) group 7, and (d) group 8. The grey, brown, blue, and white balls represent Pt, C, N, and H atoms, respectively.

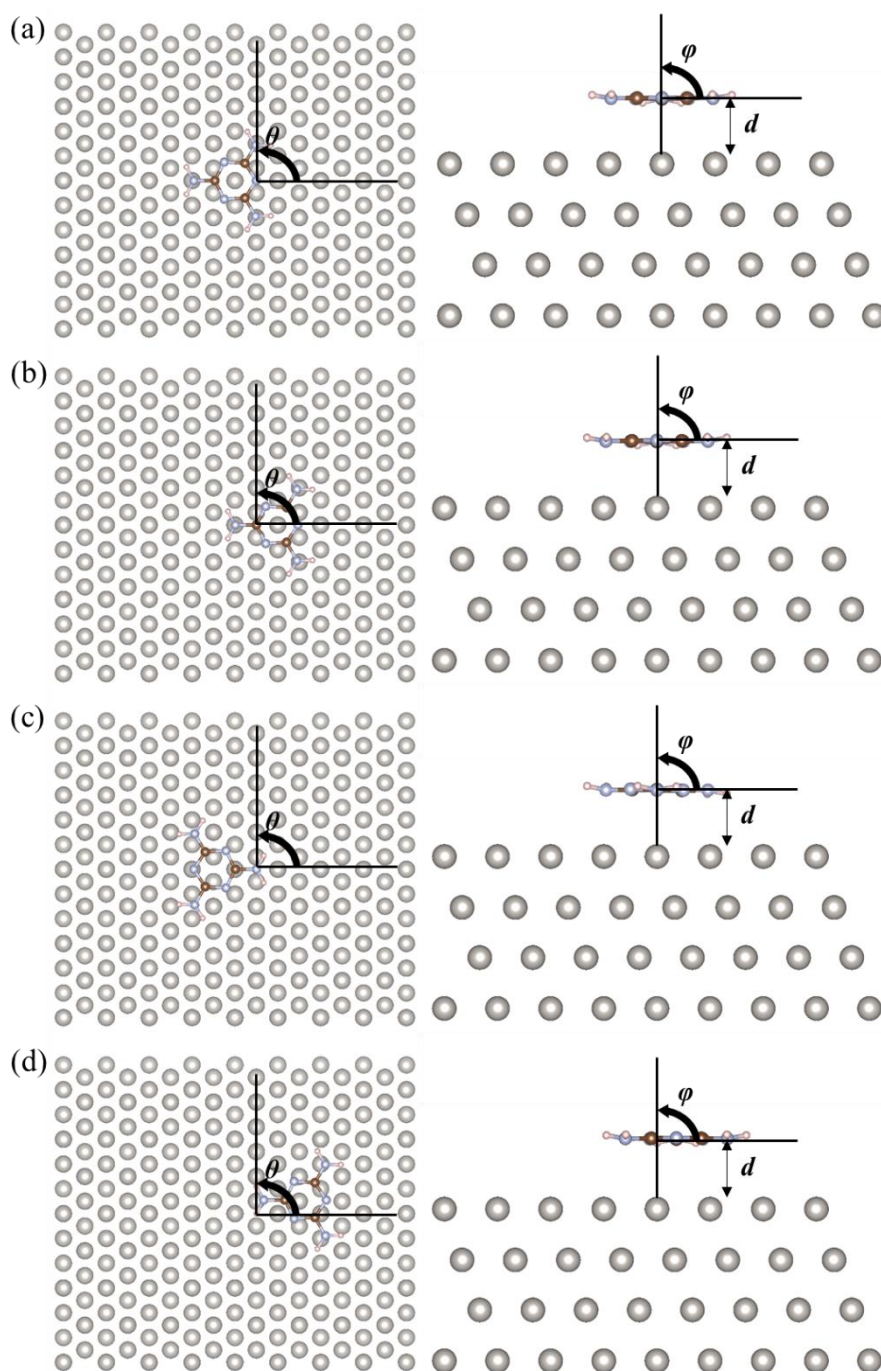

**Figure S3.** Top (left) and side (right) views of the models for estimating the potential energy map of melamine adsorption on Pt(111) surface: (a) group 9, (b) group 10, (c) group 11, and (d) group 12. The grey, brown, blue, and white balls represent Pt, C, N, and H atoms, respectively.

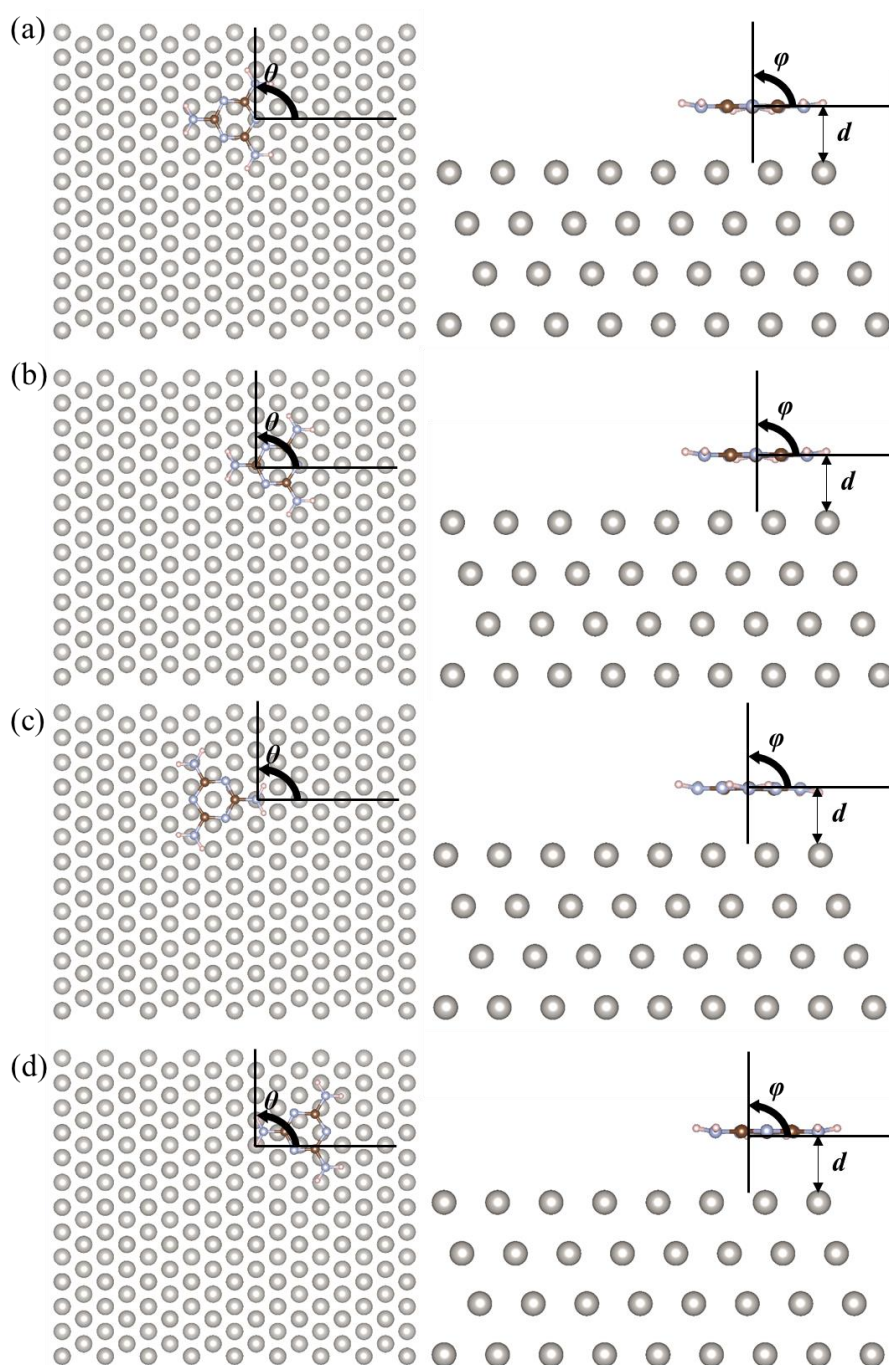

**Figure S4.** Top (left) and side (right) views of the models for estimating the potential energy map of melamine adsorption on Pt(111) surface: (a) group 13, (b) group 14, (c) group 15, and (d) group 16. The grey, brown, blue, and white balls represent Pt, C, N, and H atoms, respectively.

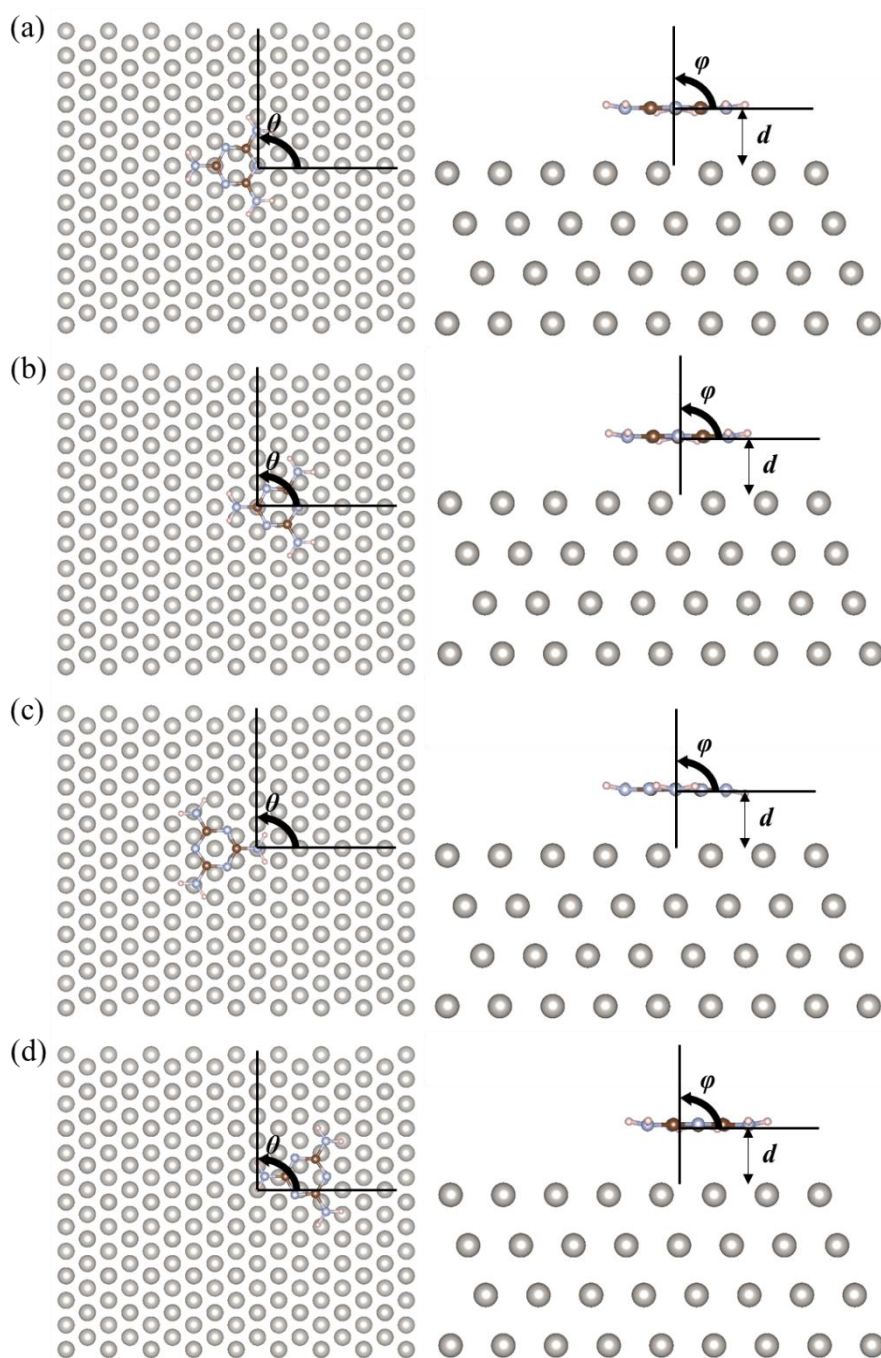

**Figure S5.** Top (left) and side (right) views of the models for estimating the potential energy map of melamine adsorption on Pt(111) surface: (a) group 17, (b) group 18, (c) group 19, and (d) 20. The grey, brown, blue, and white balls represent Pt, C, N, and H atoms, respectively.

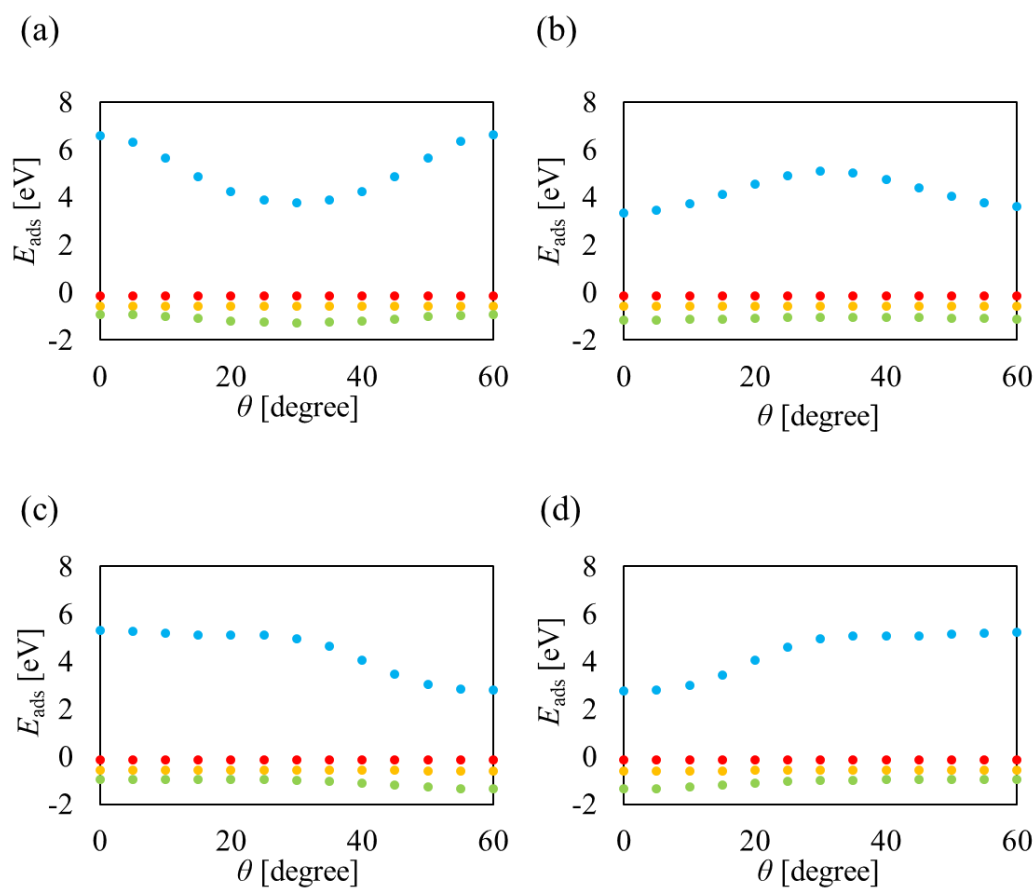

**Figure S6.** Calculated potential energy mapping of melamine adsorption on Pt(111) surface: (a) group 1, (b) group 2, (c) group 3, and (d) group 4. The red, yellow, green, and blue dots represent the results for  $d = 5.0, 4.0, 3.0,$  and  $2.0 \text{ \AA}$ , respectively.  $E_{\text{ads}}$ ,  $d$ , and  $\theta$  are the adsorption energy, distance between melamine and Pt, and molecular rotation angle, respectively.

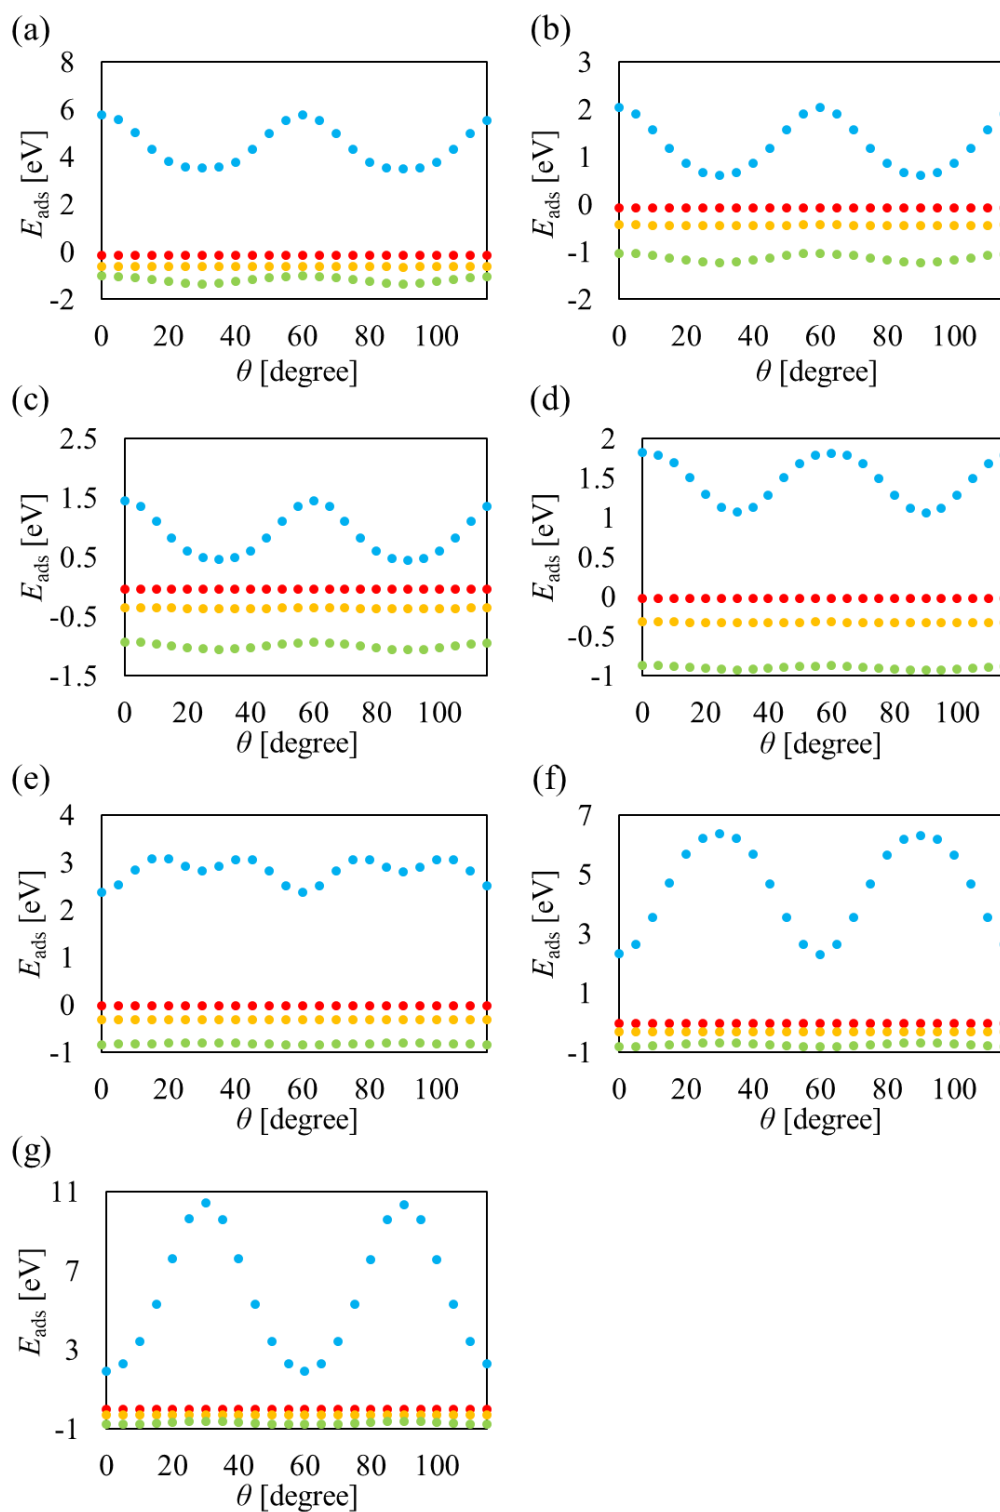

**Figure S7.** Calculated potential energy mapping of melamine adsorption on Pt(111) surface: group 5. (a)  $\varphi = 0$ , (b)  $\varphi = 15$ , (c)  $\varphi = 30$ , (d)  $\varphi = 45$ , (e)  $\varphi = 60$ , (f)  $\varphi = 75$ , and (g)  $\varphi = 90$  degrees. The red, yellow, green, and blue dots represent the results for  $d = 5.0, 4.0, 3.0,$  and  $2.0 \text{ \AA}$ , respectively.  $E_{\text{ads}}, d, \theta,$  and  $\varphi$  are the adsorption energy, distance between melamine and Pt, molecular rotation angle, and the upright angle of the molecule from the surface, respectively.



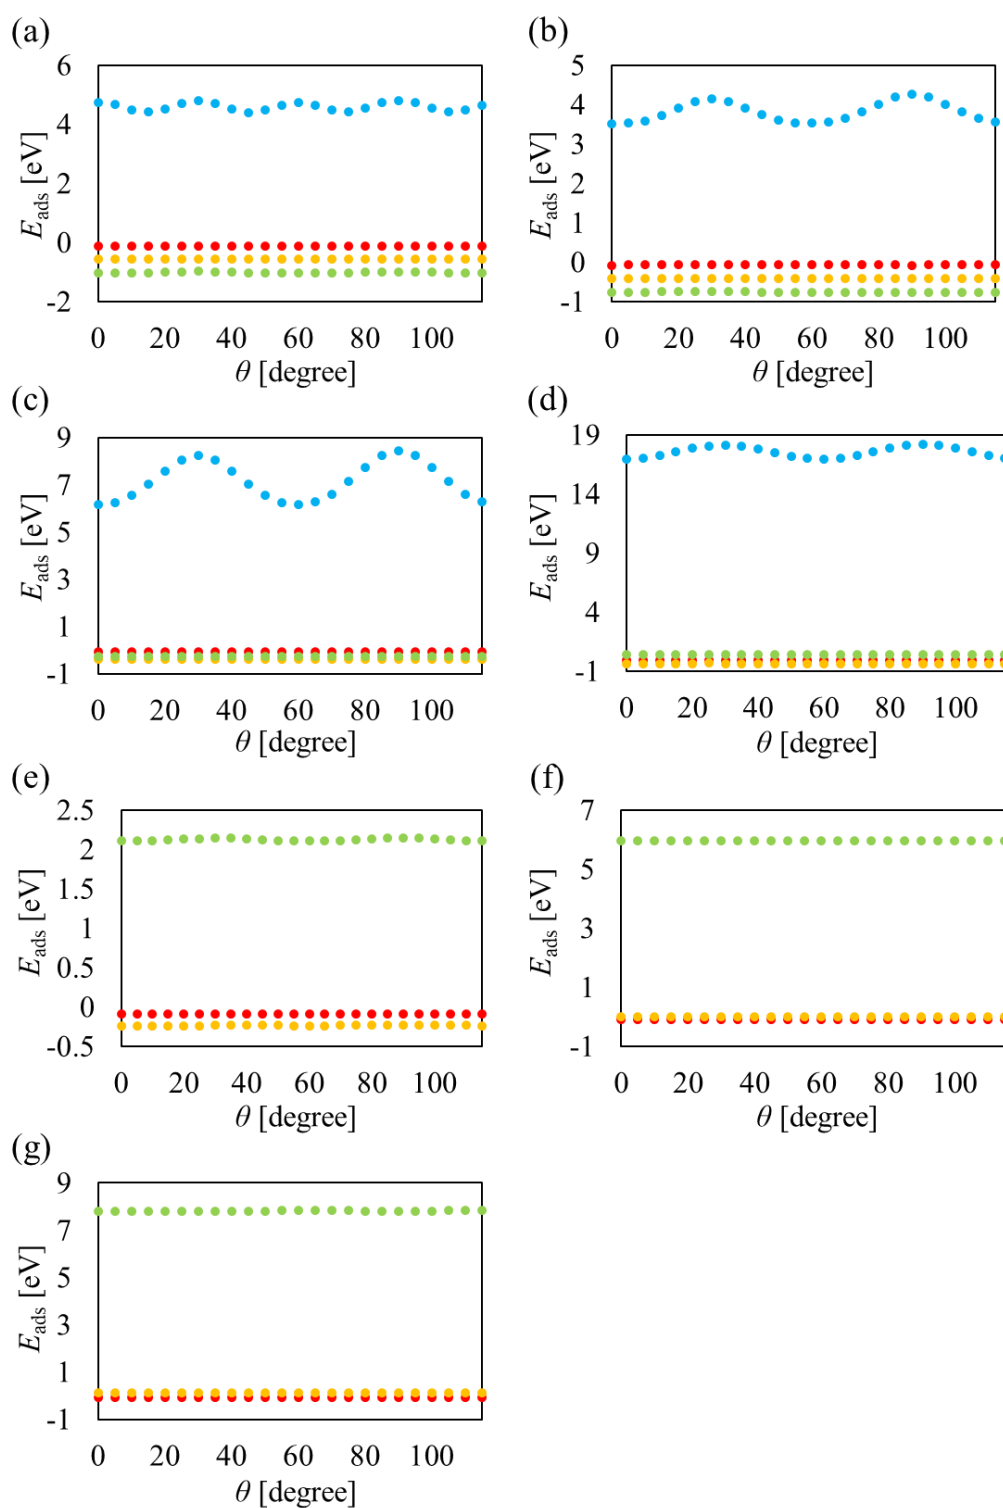

**Figure S8.** Calculated potential energy mapping of melamine adsorption on Pt(111) surface: group 6. (a)  $\varphi = 0$ , (b)  $\varphi = 15$ , (c)  $\varphi = 30$ , (d)  $\varphi = 45$ , (e)  $\varphi = 60$ , (f)  $\varphi = 75$ , and (g)  $\varphi = 90$  degrees. The red, yellow, green, and blue dots represent the results for  $d = 5.0, 4.0, 3.0,$  and  $2.0 \text{ \AA}$ , respectively.  $E_{\text{ads}}$ ,  $d$ ,  $\theta$ , and  $\varphi$  are the adsorption energy, distance between melamine and Pt, molecular rotation angle, and the upright angle of the molecule from the surface, respectively.

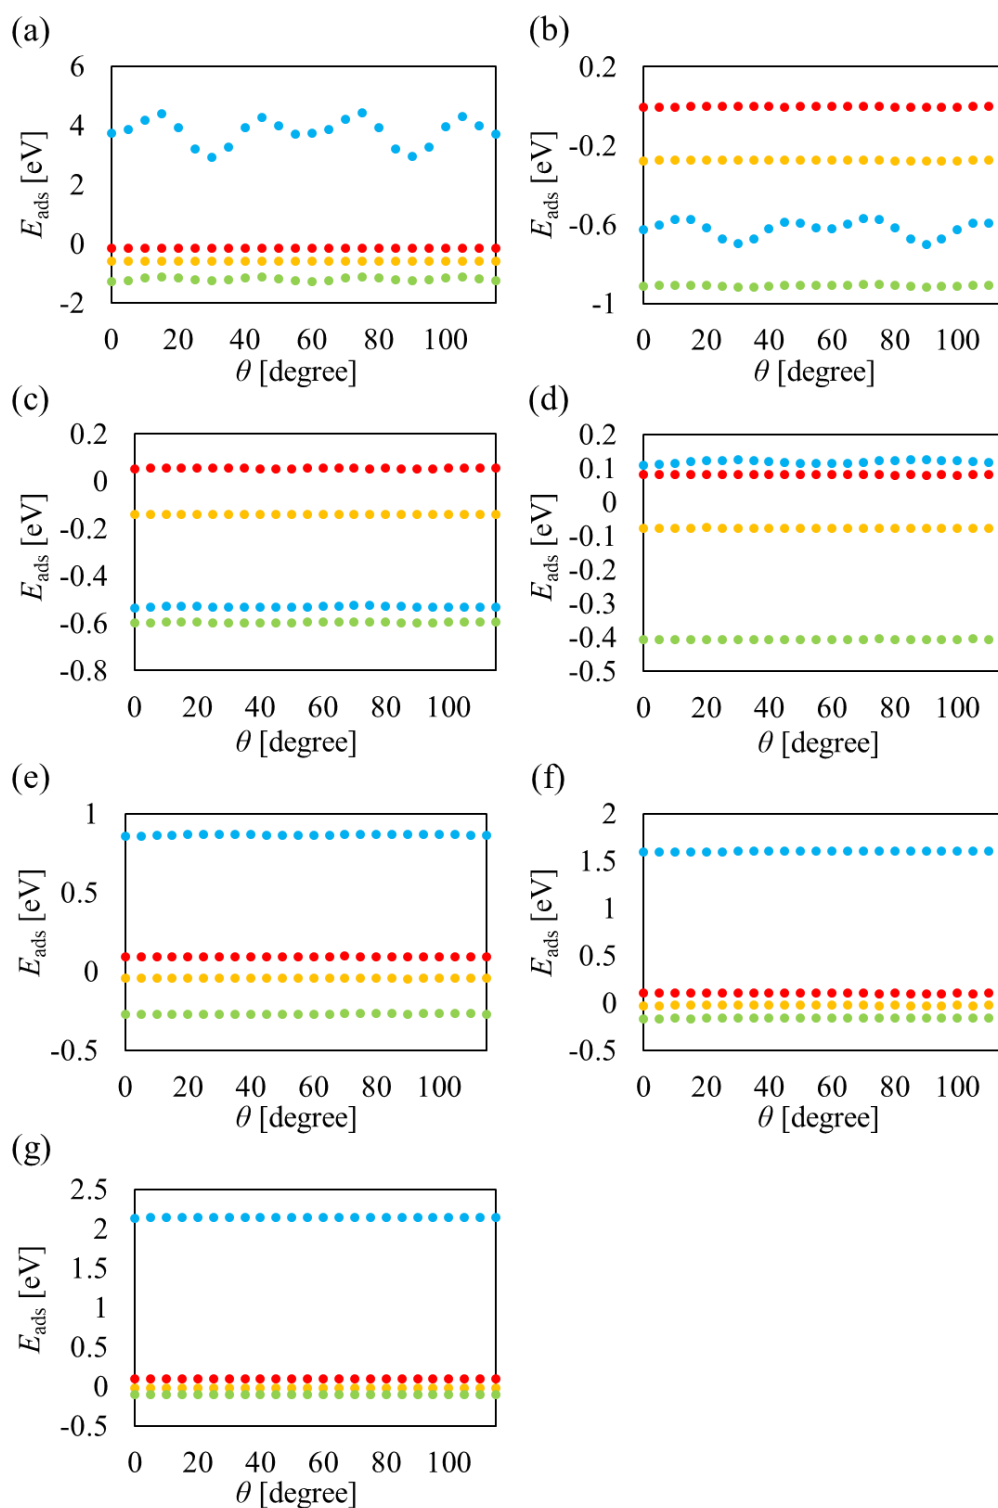

**Figure S9.** Calculated potential energy mapping of melamine adsorption on Pt(111) surface: group 7. (a)  $\phi = 0$ , (b)  $\phi = 15$ , (c)  $\phi = 30$ , (d)  $\phi = 45$ , (e)  $\phi = 60$ , (f)  $\phi = 75$ , and (g)  $\phi = 90$  degrees. The red, yellow, green, and blue dots represent the results for  $d = 5.0, 4.0, 3.0$ , and  $2.0 \text{ \AA}$ , respectively.  $E_{\text{ads}}$ ,  $d$ ,  $\theta$ , and  $\phi$  are the adsorption energy, distance between melamine and Pt, molecular rotation angle, and the upright angle of the molecule from the surface, respectively.

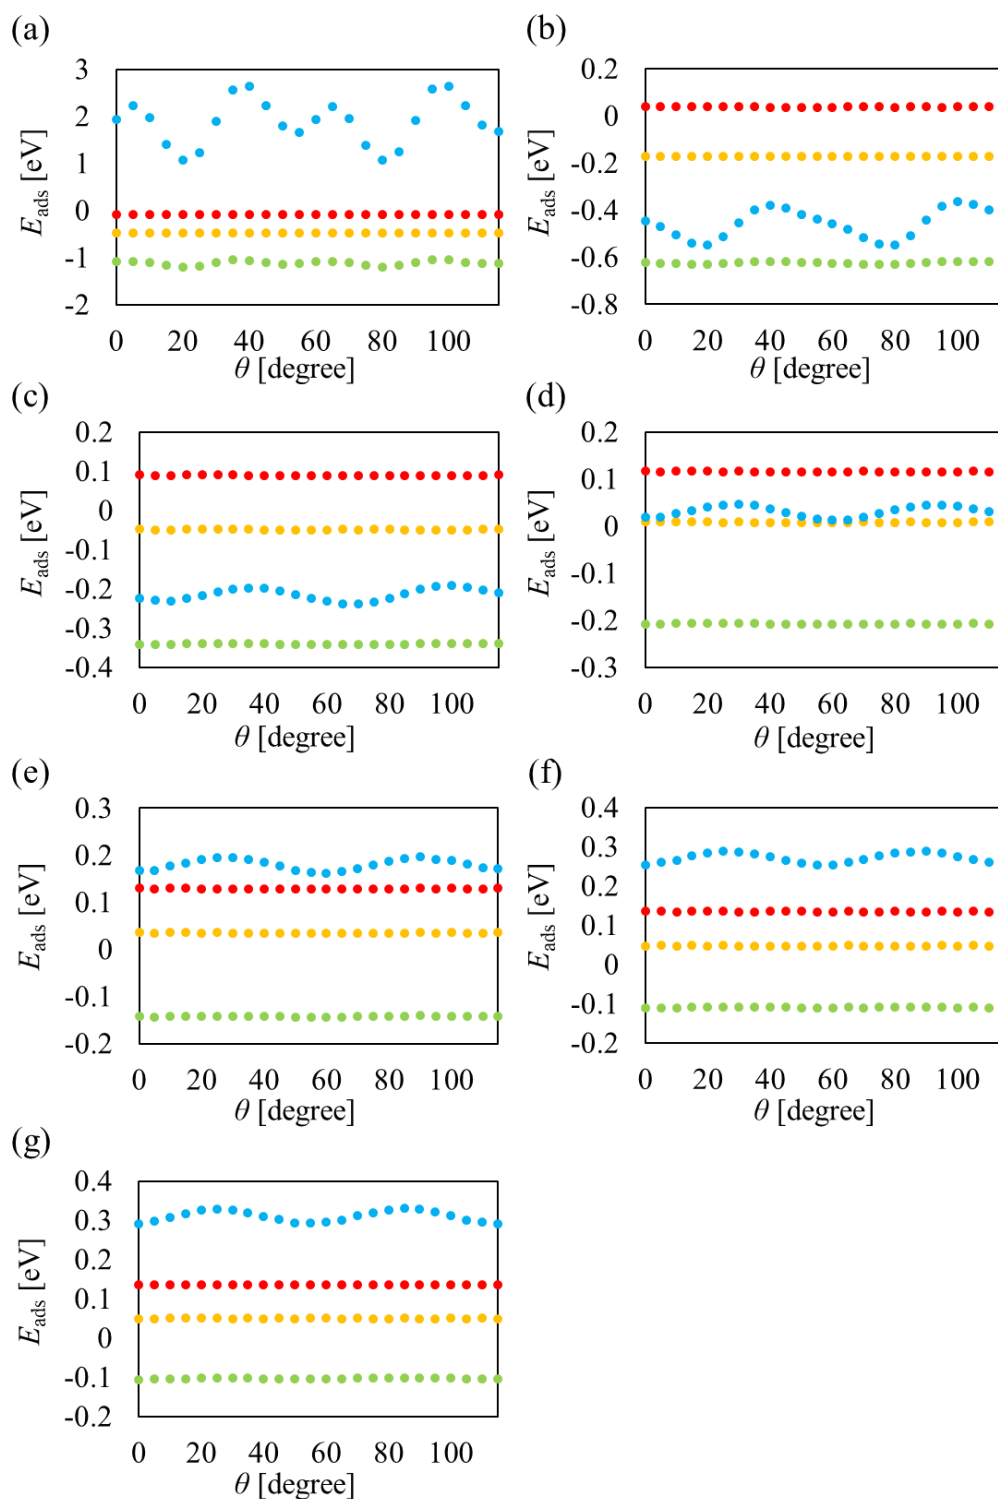

**Figure S10.** Calculated potential energy mapping of melamine adsorption on Pt(111) surface: group 8. (a)  $\varphi = 0$ , (b)  $\varphi = 15$ , (c)  $\varphi = 30$ , (d)  $\varphi = 45$ , (e)  $\varphi = 60$ , (f)  $\varphi = 75$ , and (g)  $\varphi = 90$  degrees. The red, yellow, green, and blue dots represent the results for  $d = 5.0, 4.0, 3.0,$  and  $2.0 \text{ \AA}$ , respectively.  $E_{\text{ads}}, d, \theta,$  and  $\varphi$  are the adsorption energy, distance between melamine and Pt, molecular rotation angle, and the upright angle of the molecule from the surface, respectively.

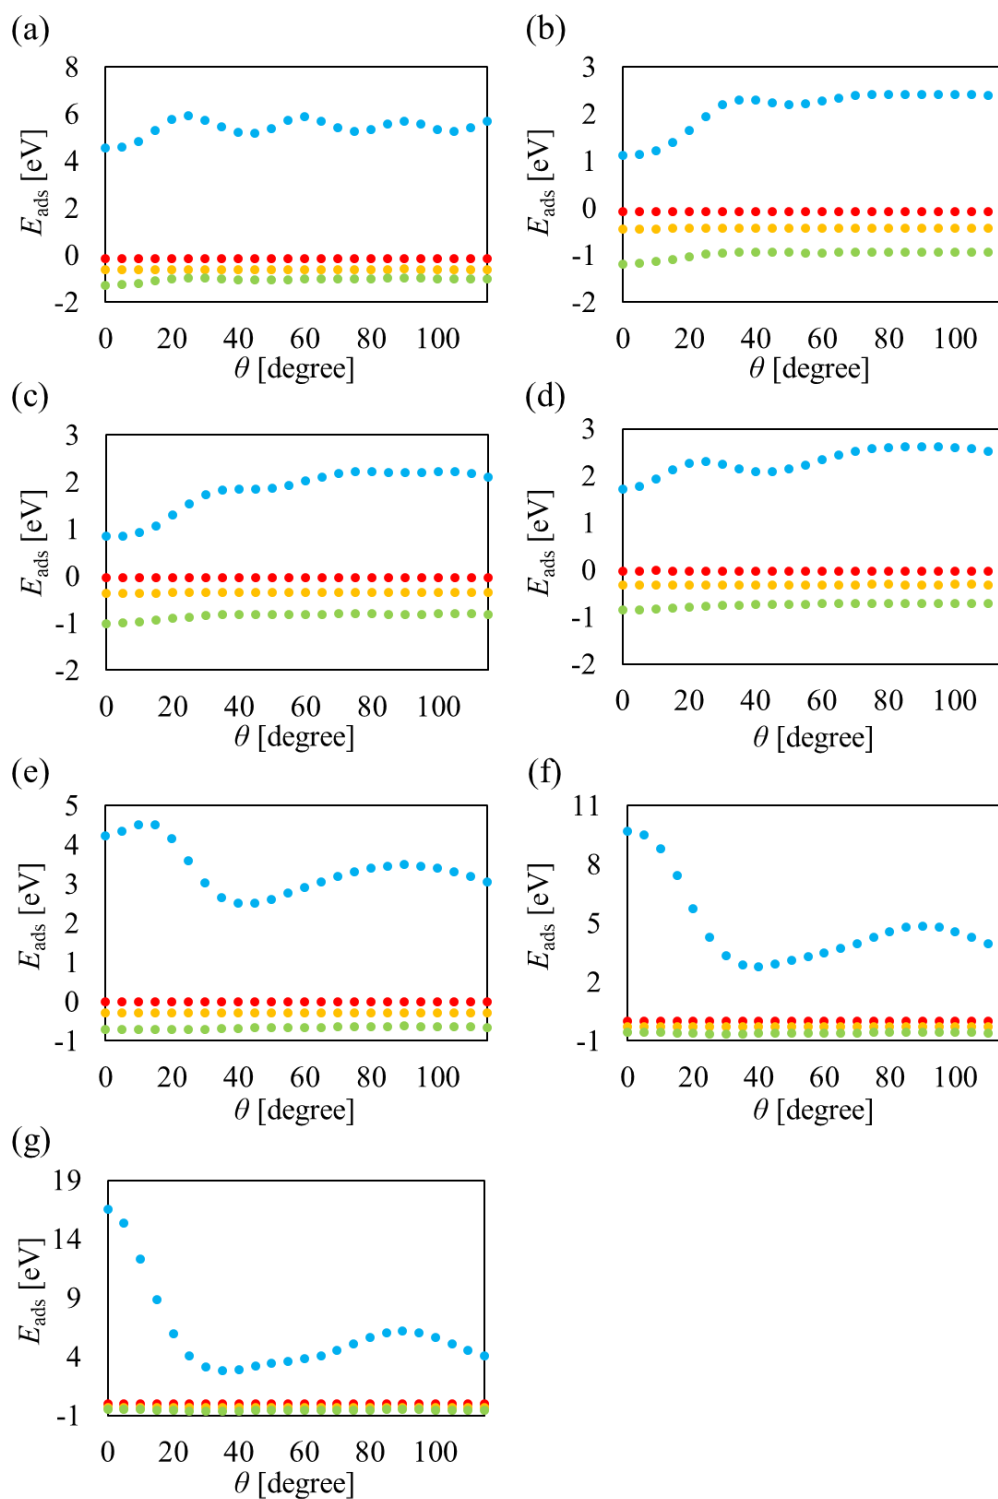

**Figure S11.** Calculated potential energy mapping of melamine adsorption on Pt(111) surface: group 9. (a)  $\phi = 0$ , (b)  $\phi = 15$ , (c)  $\phi = 30$ , (d)  $\phi = 45$ , (e)  $\phi = 60$ , (f)  $\phi = 75$ , and (g)  $\phi = 90$  degrees. The red, yellow, green, and blue dots represent the results for  $d = 5.0, 4.0, 3.0,$  and  $2.0 \text{ \AA}$ , respectively.  $E_{\text{ads}}, d, \theta,$  and  $\phi$  are the adsorption energy, distance between melamine and Pt, molecular rotation angle, and the upright angle of the molecule from the surface, respectively.

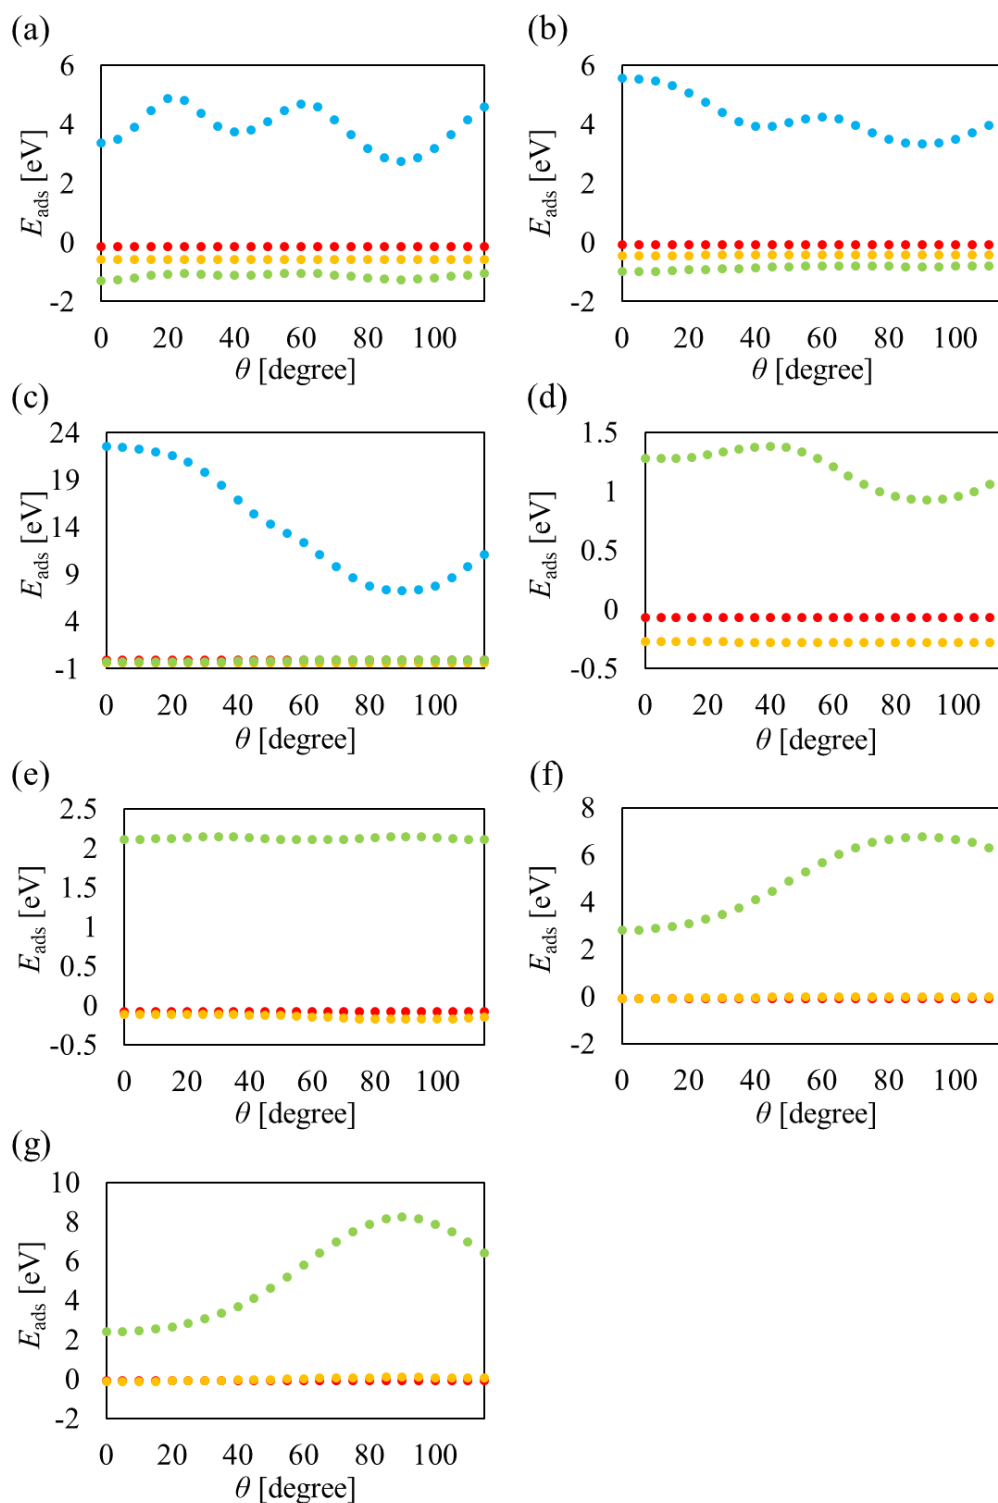

**Figure S12.** Calculated potential energy mapping of melamine adsorption on Pt(111) surface: group 10. (a)  $\varphi = 0$ , (b)  $\varphi = 15$ , (c)  $\varphi = 30$ , (d)  $\varphi = 45$ , (e)  $\varphi = 60$ , (f)  $\varphi = 75$ , and (g)  $\varphi = 90$  degrees. The red, yellow, green, and blue dots represent the results for  $d = 5.0, 4.0, 3.0,$  and  $2.0 \text{ \AA}$ , respectively.  $E_{\text{ads}}$ ,  $d$ ,  $\theta$ , and  $\varphi$  are the adsorption energy, distance between melamine and Pt, molecular rotation angle, and the upright angle of the molecule from the surface, respectively.

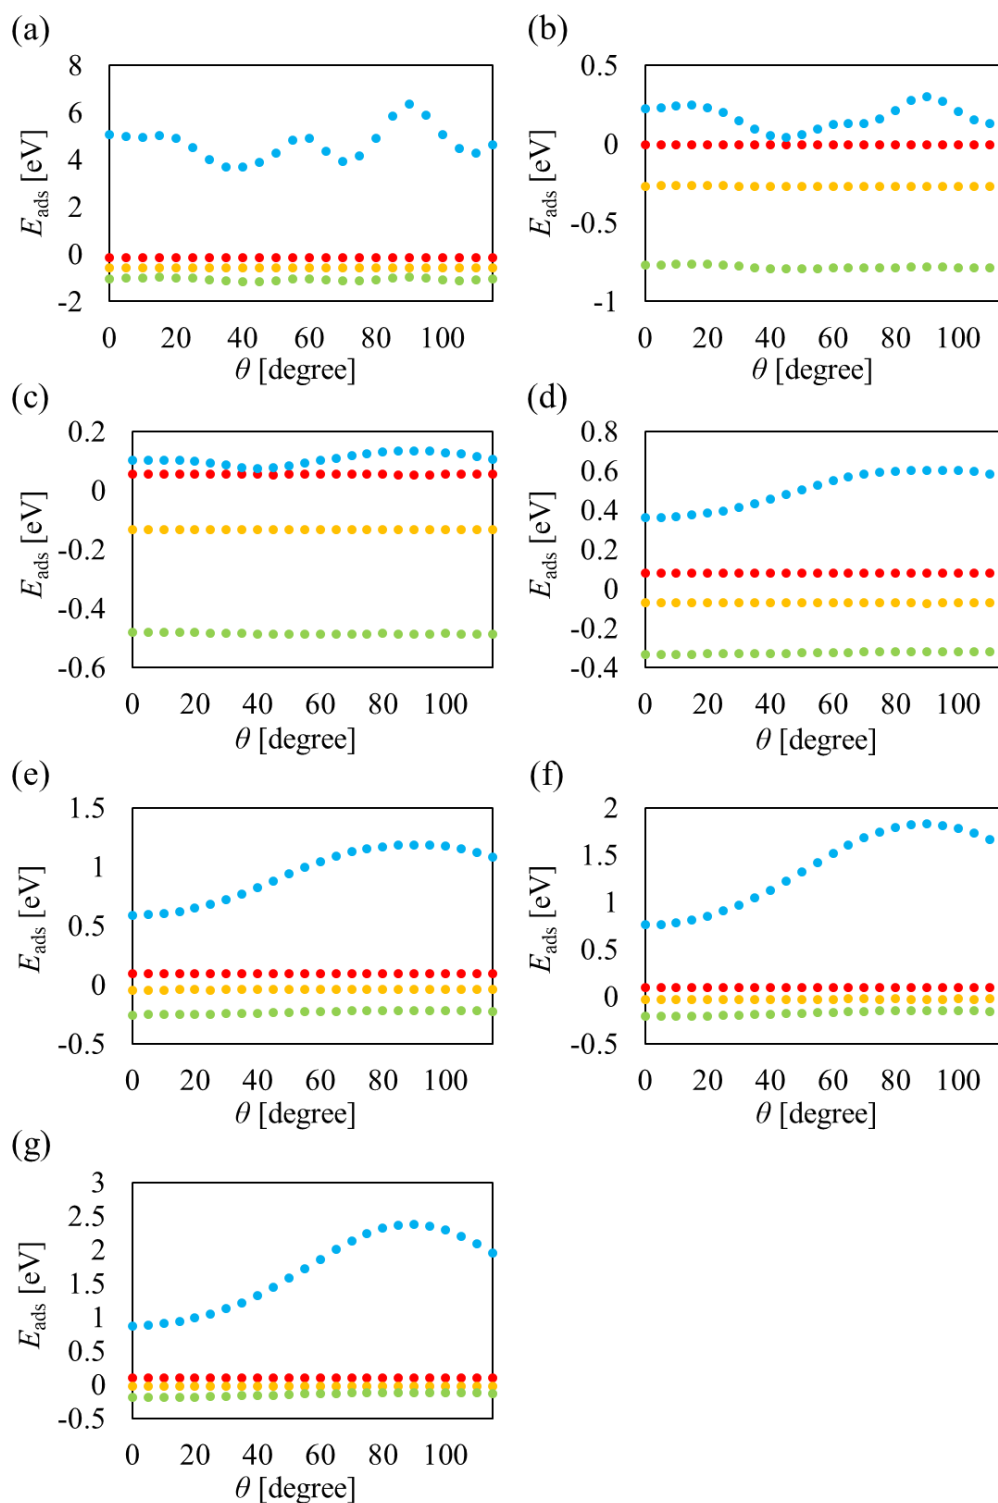

**Figure S13.** Calculated potential energy mapping of melamine adsorption on Pt(111) surface: group 11. (a)  $\varphi = 0$ , (b)  $\varphi = 15$ , (c)  $\varphi = 30$ , (d)  $\varphi = 45$ , (e)  $\varphi = 60$ , (f)  $\varphi = 75$ , and (g)  $\varphi = 90$  degrees. The red, yellow, green, and blue dots represent the results for  $d = 5.0, 4.0, 3.0,$  and  $2.0 \text{ \AA}$ , respectively.  $E_{\text{ads}}, d, \theta,$  and  $\varphi$  are the adsorption energy, distance between melamine and Pt, molecular rotation angle, and the upright angle of the molecule from the surface, respectively.

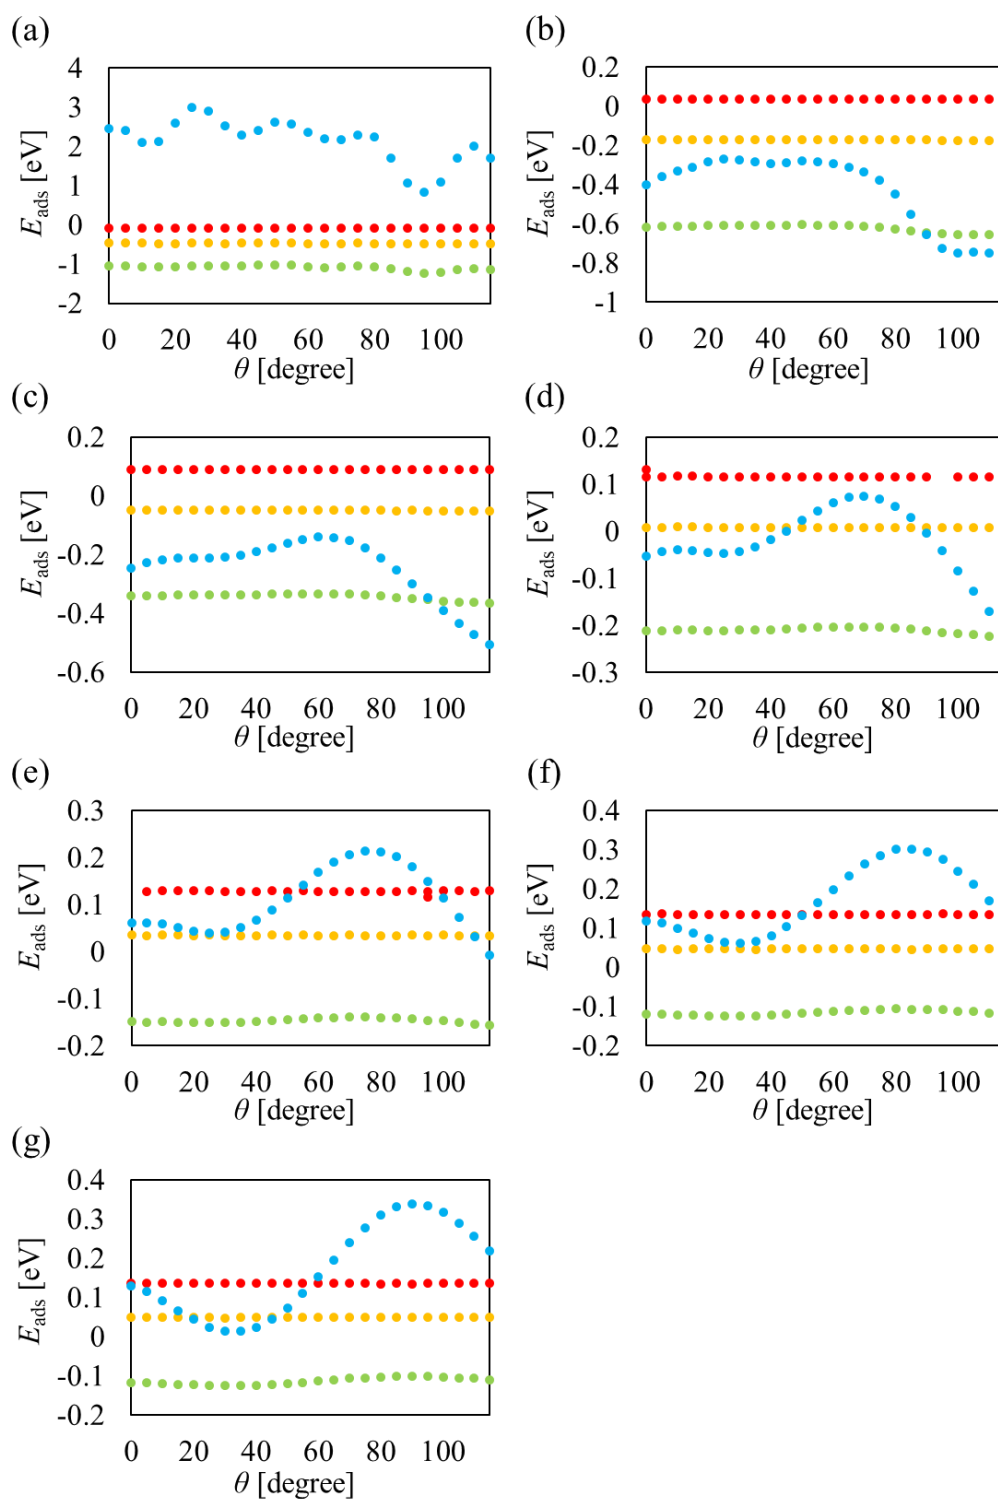

**Figure S14.** Calculated potential energy mapping of melamine adsorption on Pt(111) surface: group 12. (a)  $\varphi = 0$ , (b)  $\varphi = 15$ , (c)  $\varphi = 30$ , (d)  $\varphi = 45$ , (e)  $\varphi = 60$ , (f)  $\varphi = 75$ , and (g)  $\varphi = 90$  degrees. The red, yellow, green, and blue dots represent the results for  $d = 5.0, 4.0, 3.0,$  and  $2.0 \text{ \AA}$ , respectively.  $E_{\text{ads}}$ ,  $d$ ,  $\theta$ , and  $\varphi$  are the adsorption energy, distance between melamine and Pt, molecular rotation angle, and the upright angle of the molecule from the surface, respectively.

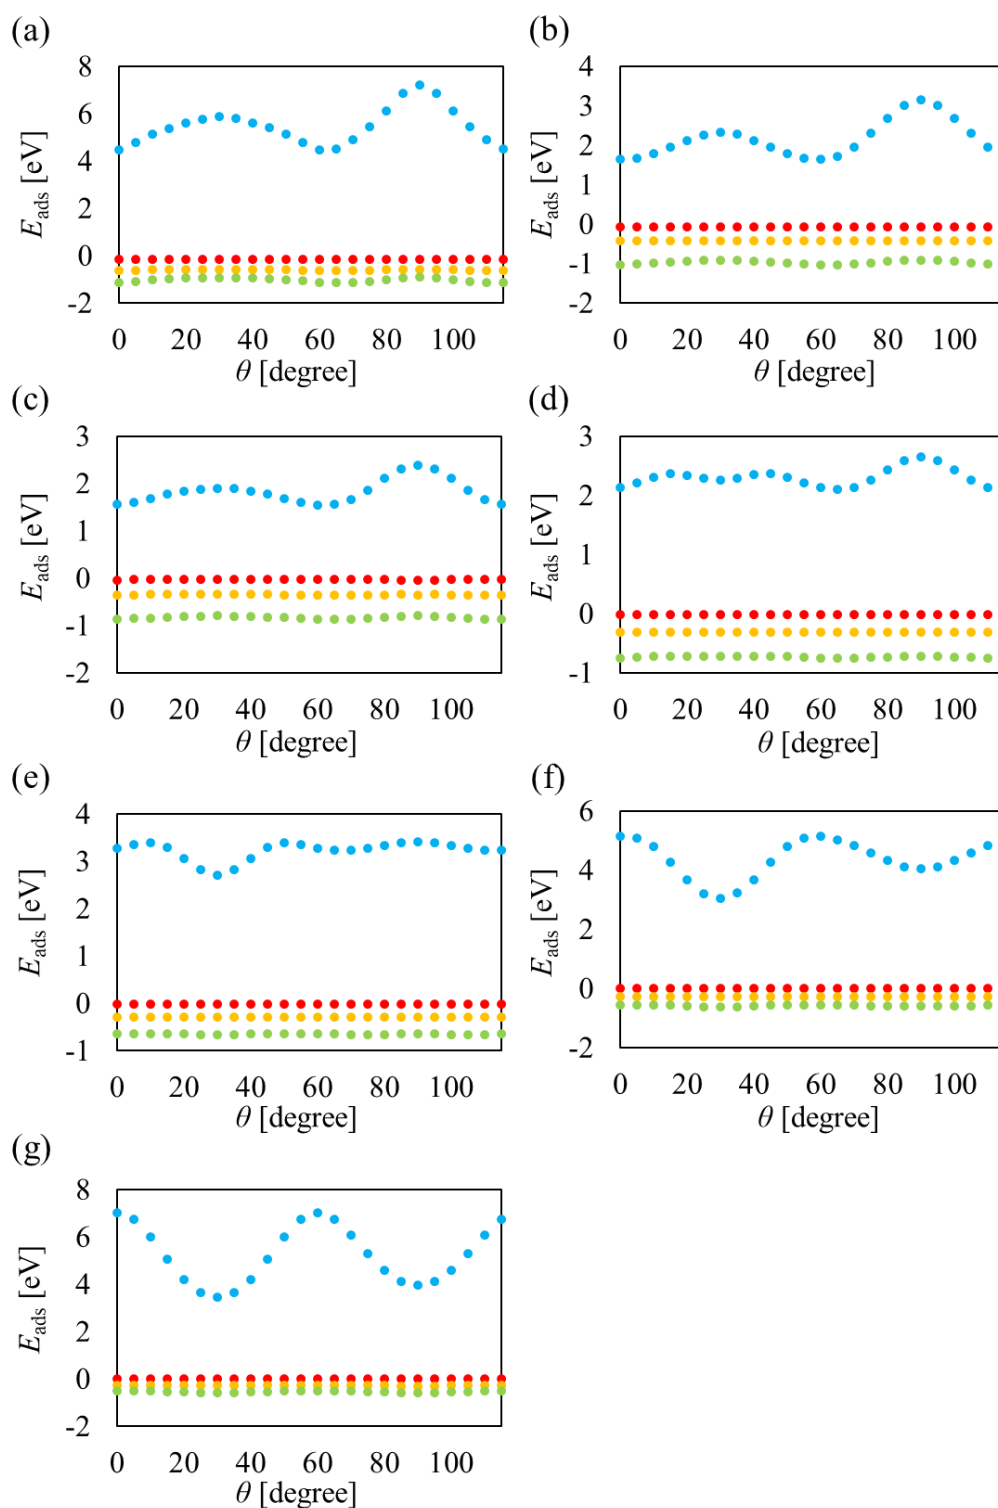

**Figure S15.** Calculated potential energy mapping of melamine adsorption on Pt(111) surface: group 13. (a)  $\varphi = 0$ , (b)  $\varphi = 15$ , (c)  $\varphi = 30$ , (d)  $\varphi = 45$ , (e)  $\varphi = 60$ , (f)  $\varphi = 75$ , and (g)  $\varphi = 90$  degrees. The red, yellow, green, and blue dots represent the results for  $d = 5.0, 4.0, 3.0,$  and  $2.0 \text{ \AA}$ , respectively.  $E_{\text{ads}}, d, \theta,$  and  $\varphi$  are the adsorption energy, distance between melamine and Pt, molecular rotation angle, and the upright angle of the molecule from the surface, respectively.



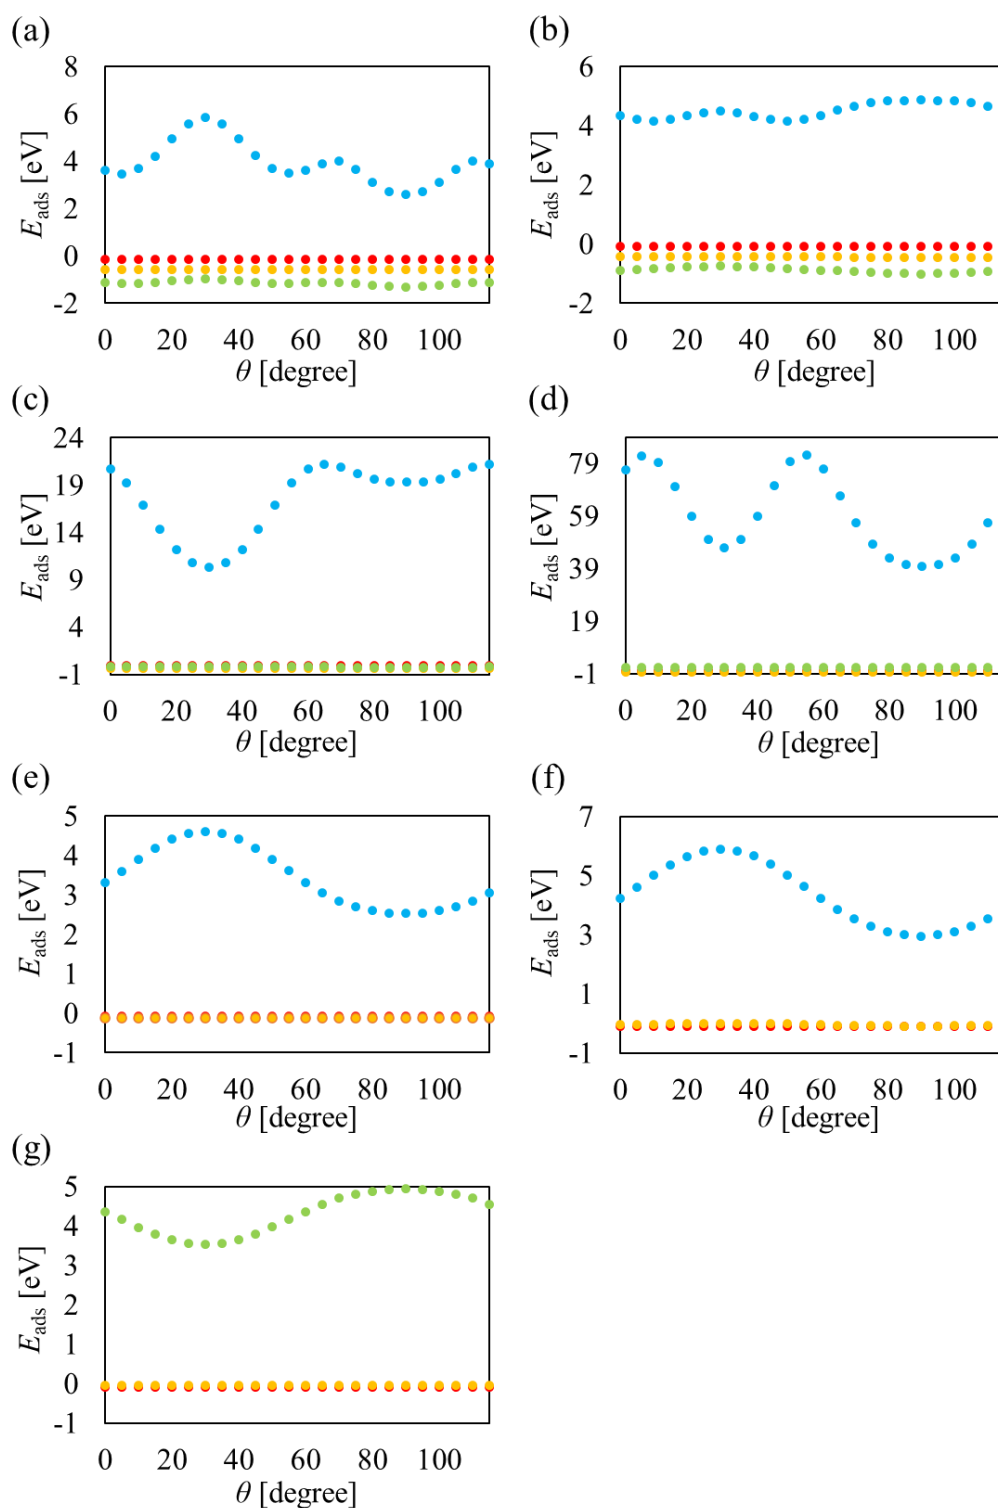

**Figure S16.** Calculated potential energy mapping of melamine adsorption on Pt(111) surface: group 14. (a)  $\varphi = 0$ , (b)  $\varphi = 15$ , (c)  $\varphi = 30$ , (d)  $\varphi = 45$ , (e)  $\varphi = 60$ , (f)  $\varphi = 75$ , and (g)  $\varphi = 90$  degrees. The red, yellow, green, and blue dots represent the results for  $d = 5.0, 4.0, 3.0,$  and  $2.0 \text{ \AA}$ , respectively.  $E_{\text{ads}}, d, \theta,$  and  $\varphi$  are the adsorption energy, distance between melamine and Pt, molecular rotation angle, and the upright angle of the molecule from the surface, respectively.

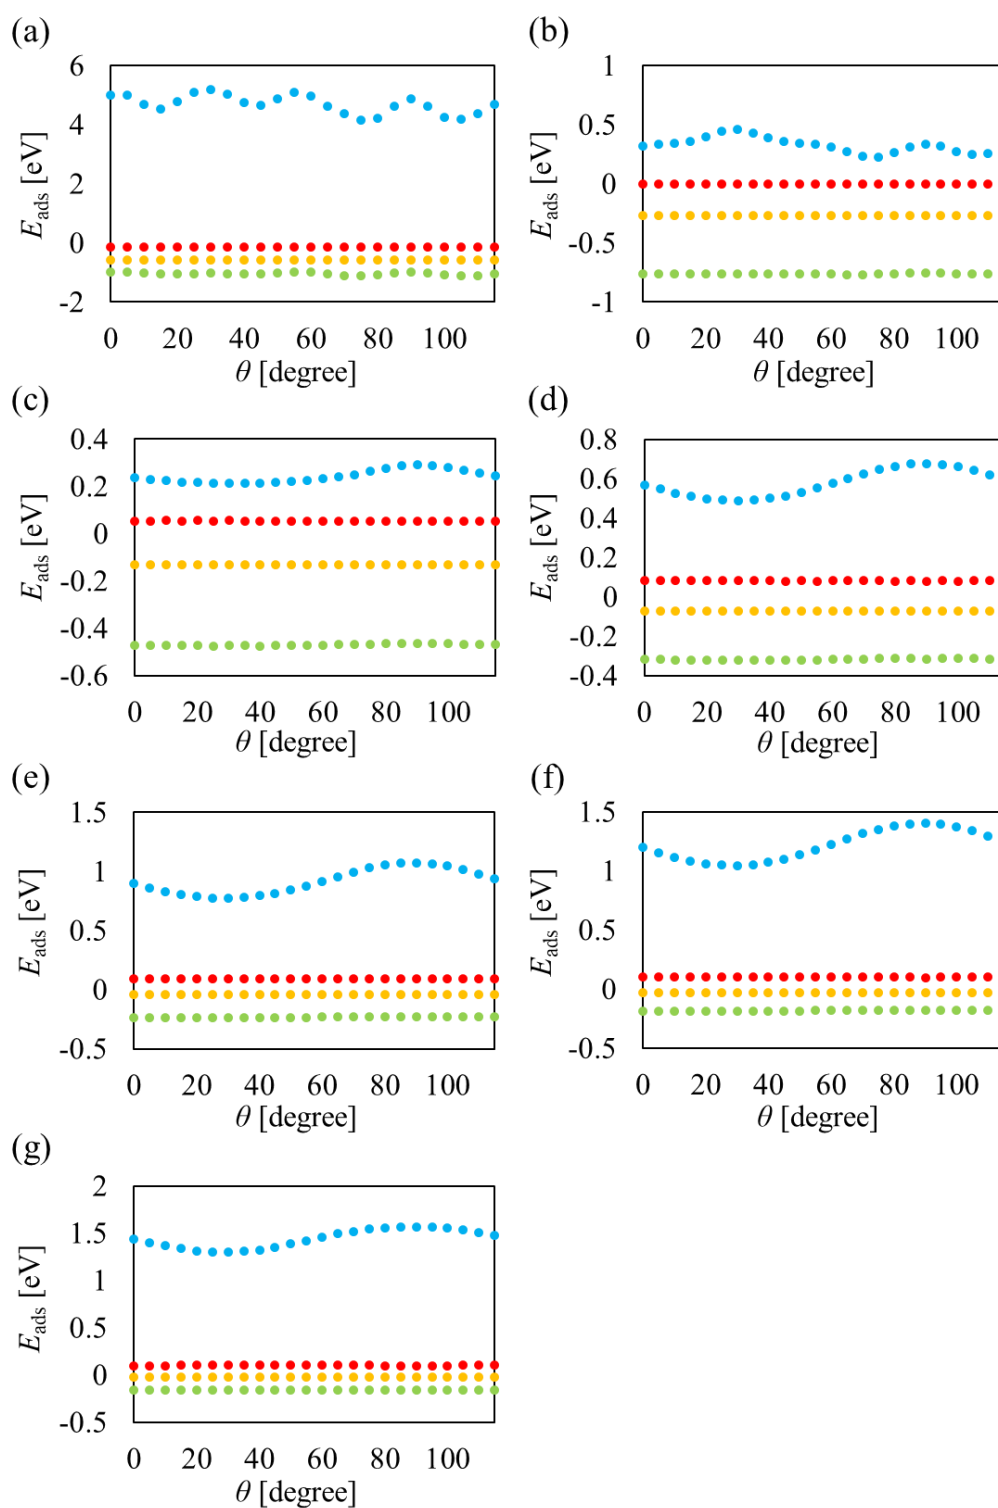

**Figure S17.** Calculated potential energy mapping of melamine adsorption on Pt(111) surface: group 15. (a)  $\varphi = 0$ , (b)  $\varphi = 15$ , (c)  $\varphi = 30$ , (d)  $\varphi = 45$ , (e)  $\varphi = 60$ , (f)  $\varphi = 75$ , and (g)  $\varphi = 90$  degrees. The red, yellow, green, and blue dots represent the results for  $d = 5.0, 4.0, 3.0,$  and  $2.0 \text{ \AA}$ , respectively.  $E_{\text{ads}}, d, \theta,$  and  $\varphi$  are the adsorption energy, distance between melamine and Pt, molecular rotation angle, and the upright angle of the molecule from the surface, respectively.

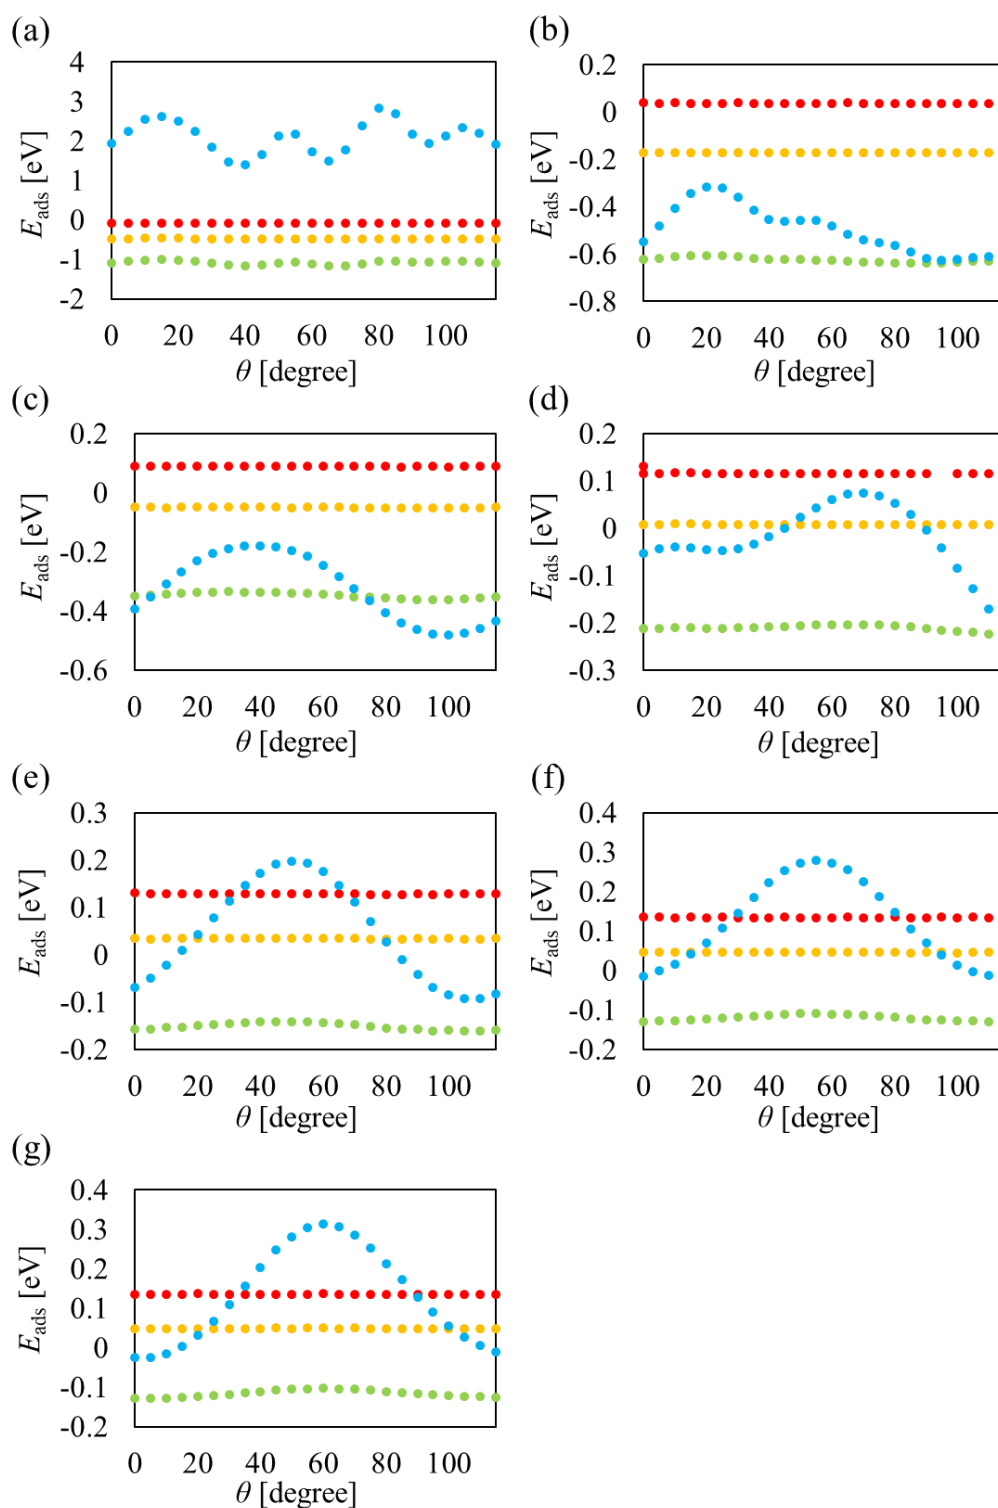

**Figure S18.** Calculated potential energy mapping of melamine adsorption on Pt(111) surface: group 16. (a)  $\varphi = 0$ , (b)  $\varphi = 15$ , (c)  $\varphi = 30$ , (d)  $\varphi = 45$ , (e)  $\varphi = 60$ , (f)  $\varphi = 75$ , and (g)  $\varphi = 90$  degrees. The red, yellow, green, and blue dots represent the results for  $d = 5.0, 4.0, 3.0,$  and  $2.0 \text{ \AA}$ , respectively.  $E_{\text{ads}}, d, \theta,$  and  $\varphi$  are the adsorption energy, distance between melamine and Pt, molecular rotation angle, and the upright angle of the molecule from the surface, respectively.

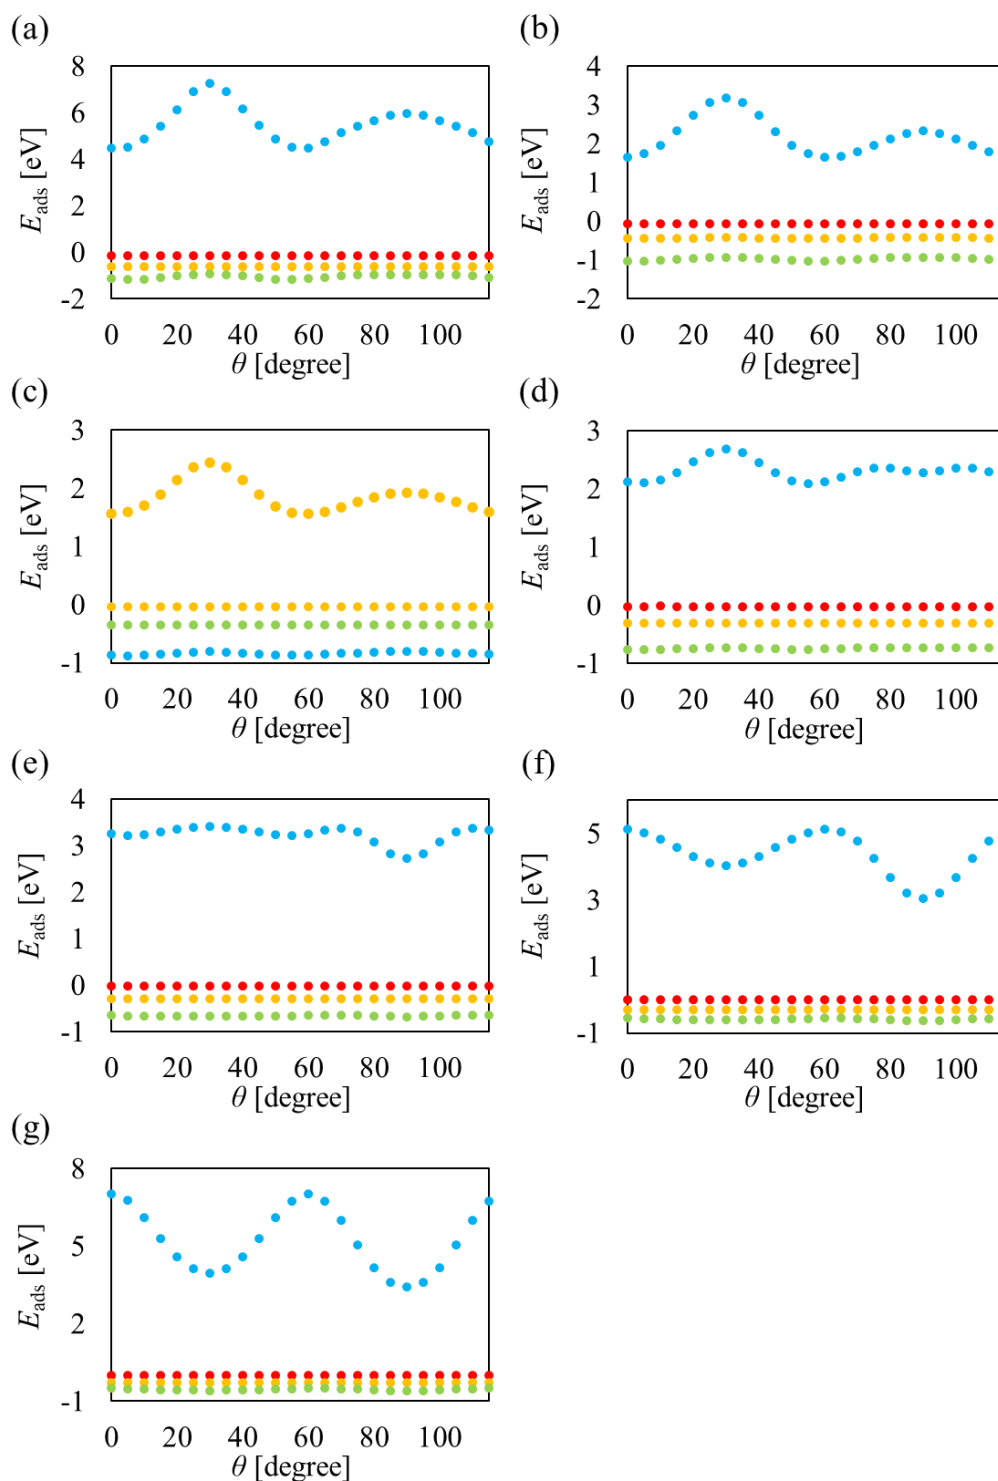

**Figure S19.** Calculated potential energy mapping of melamine adsorption on Pt(111) surface: group 17. (a)  $\varphi = 0$ , (b)  $\varphi = 15$ , (c)  $\varphi = 30$ , (d)  $\varphi = 45$ , (e)  $\varphi = 60$ , (f)  $\varphi = 75$ , and (g)  $\varphi = 90$  degrees. The red, yellow, green, and blue dots represent the results for  $d = 5.0, 4.0, 3.0,$  and  $2.0 \text{ \AA}$ , respectively.  $E_{\text{ads}}$ ,  $d$ ,  $\theta$ , and  $\varphi$  are the adsorption energy, distance between melamine and Pt, molecular rotation angle, and the upright angle of the molecule from the surface, respectively.

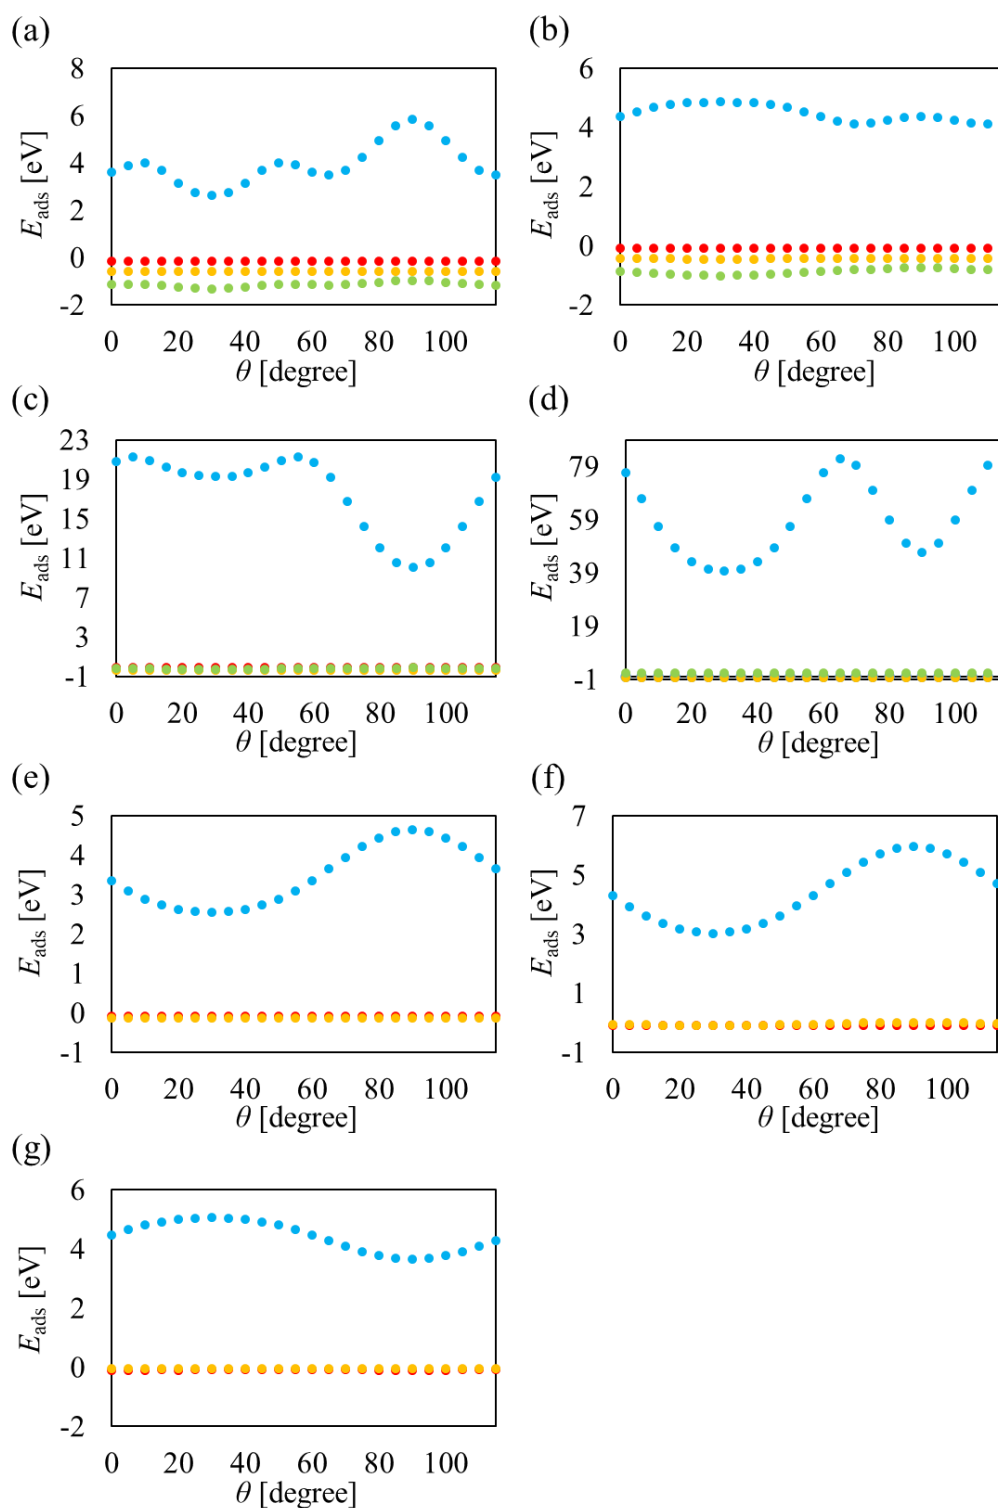

**Figure S20.** Calculated potential energy mapping of melamine adsorption on Pt(111) surface: group 18. (a)  $\varphi = 0$ , (b)  $\varphi = 15$ , (c)  $\varphi = 30$ , (d)  $\varphi = 45$ , (e)  $\varphi = 60$ , (f)  $\varphi = 75$ , and (g)  $\varphi = 90$  degrees. The red, yellow, green, and blue dots represent the results for  $d = 5.0, 4.0, 3.0,$  and  $2.0 \text{ \AA}$ , respectively.  $E_{\text{ads}}$ ,  $d$ ,  $\theta$ , and  $\varphi$  are the adsorption energy, distance between melamine and Pt, molecular rotation angle, and the upright angle of the molecule from the surface, respectively.

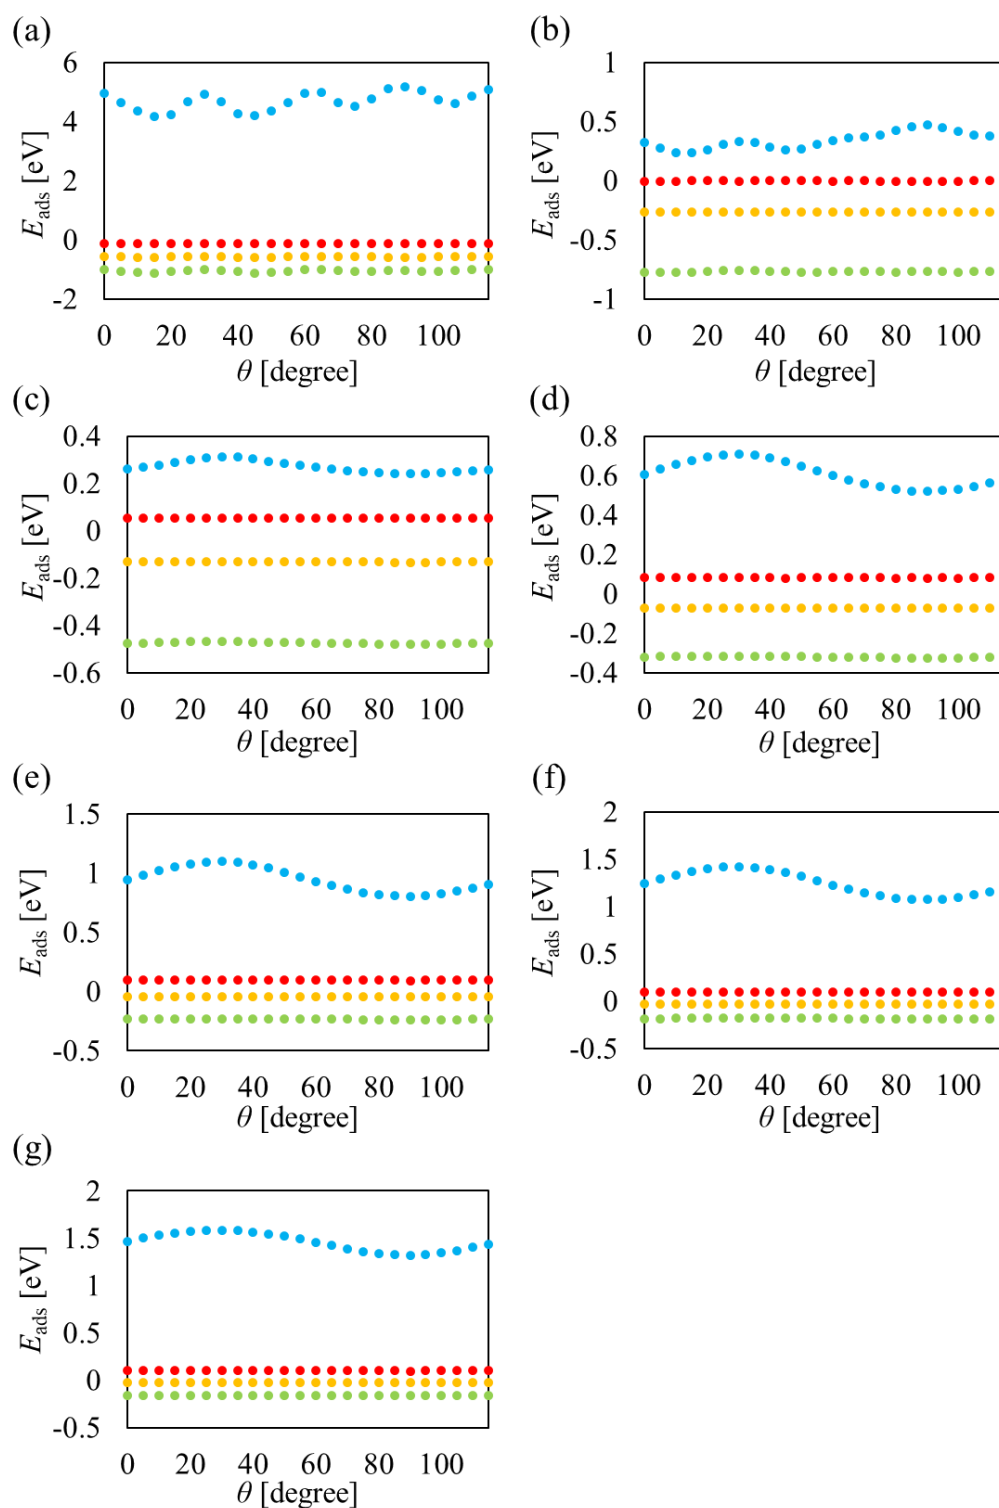

**Figure S21.** Calculated potential energy mapping of melamine adsorption on Pt(111) surface: group 19. (a)  $\varphi = 0$ , (b)  $\varphi = 15$ , (c)  $\varphi = 30$ , (d)  $\varphi = 45$ , (e)  $\varphi = 60$ , (f)  $\varphi = 75$ , and (g)  $\varphi = 90$  degrees. The red, yellow, green, and blue dots represent the results for  $d = 5.0, 4.0, 3.0,$  and  $2.0 \text{ \AA}$ , respectively.  $E_{\text{ads}}, d, \theta,$  and  $\varphi$  are the adsorption energy, distance between melamine and Pt, molecular rotation angle, and the upright angle of the molecule from the surface, respectively.

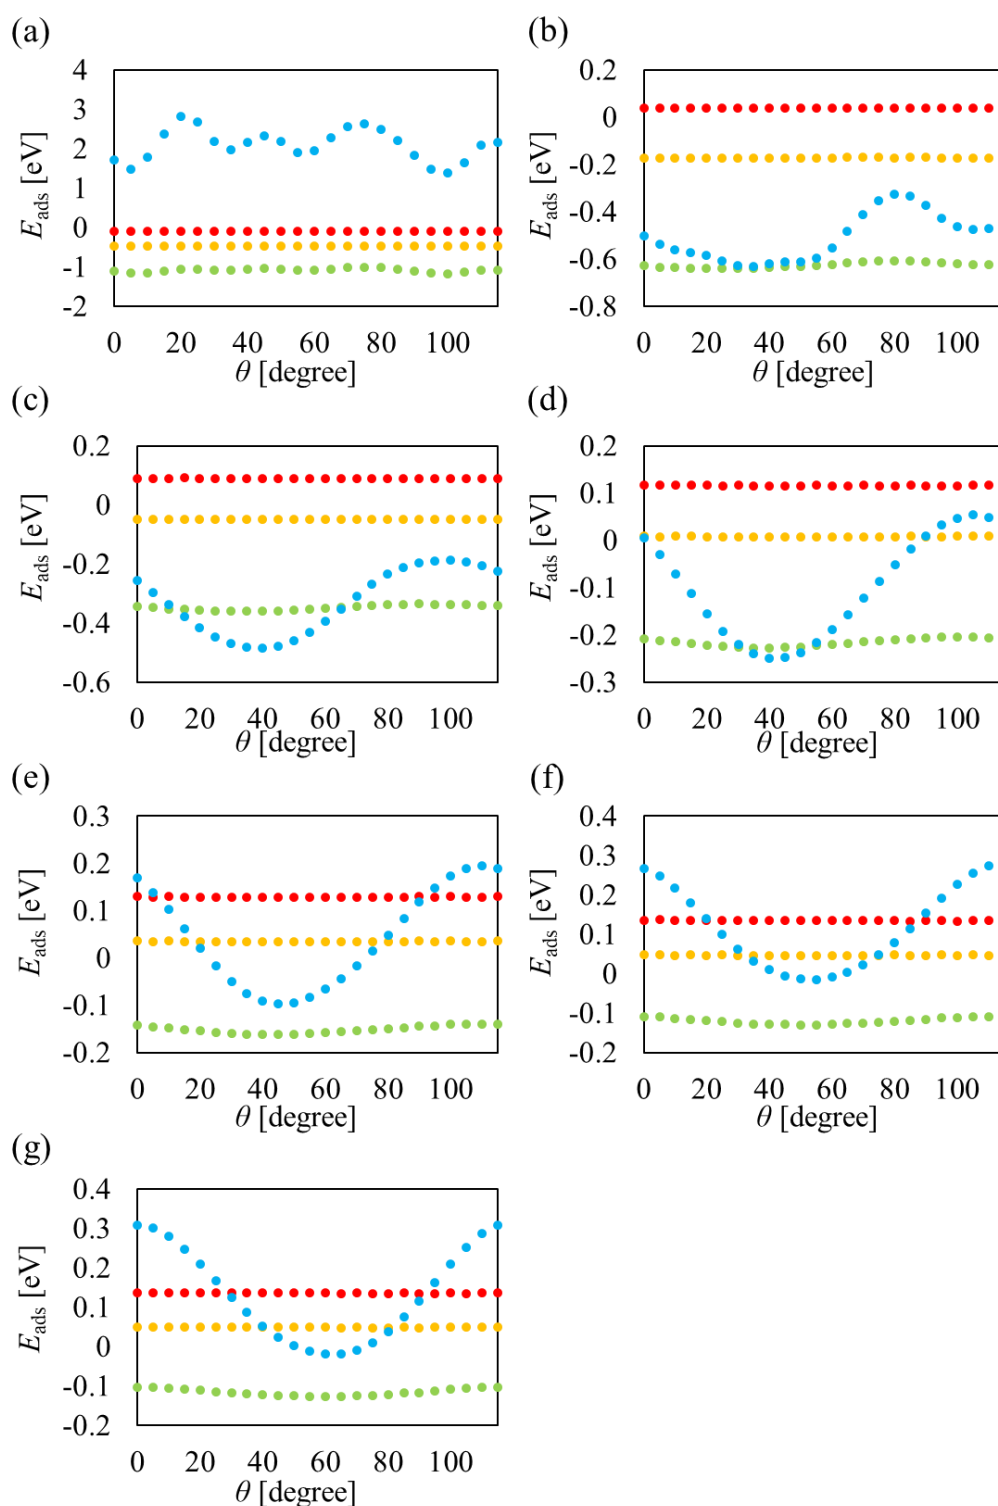

**Figure S22.** Calculated potential energy mapping of melamine adsorption on Pt(111) surface: group 20. (a)  $\varphi = 0$ , (b)  $\varphi = 15$ , (c)  $\varphi = 30$ , (d)  $\varphi = 45$ , (e)  $\varphi = 60$ , (f)  $\varphi = 75$ , and (g)  $\varphi = 90$  degrees. The red, yellow, green, and blue dots represent the results for  $d = 5.0, 4.0, 3.0,$  and  $2.0 \text{ \AA}$ , respectively.  $E_{\text{ads}}, d, \theta,$  and  $\varphi$  are the adsorption energy, distance between melamine and Pt, molecular rotation angle, and the upright angle of the molecule from the surface, respectively.

**Table S1.** Initial structure information on the 63 entries

| Entry | Map-group | $d$ [Å] | $\theta$ [°] | $\phi$ [°] | Entry | Map-group | $d$ [Å] | $\theta$ [°] | $\phi$ [°] |
|-------|-----------|---------|--------------|------------|-------|-----------|---------|--------------|------------|
| 1     | 5         | 2.00    | 30.0         | 0.0        | 34    | 7         | 3.00    | 90.0         | 0.0        |
| 2     | 5         | 3.00    | 30.0         | 0.0        | 35    | 7         | 4.00    | 90.0         | 0.0        |
| 3     | 5         | 4.00    | 30.0         | 0.0        | 36    | 7         | 2.00    | 0.0          | 15.0       |
| 4     | 5         | 2.00    | 30.0         | 15.0       | 37    | 7         | 3.00    | 0.0          | 15.0       |
| 5     | 5         | 3.00    | 30.0         | 15.0       | 38    | 7         | 2.00    | 30.0         | 15.0       |
| 6     | 5         | 2.00    | 30.0         | 45.0       | 39    | 7         | 3.00    | 30.0         | 15.0       |
| 7     | 5         | 3.00    | 30.0         | 45.0       | 40    | 7         | 2.00    | 30.0         | 15.0       |
| 8     | 5         | 2.00    | 0.0          | 60.0       | 41    | 7         | 3.00    | 60.0         | 15.0       |
| 9     | 5         | 3.00    | 0.0          | 60.0       | 42    | 7         | 2.00    | 90.0         | 15.0       |
| 10    | 5         | 2.00    | 30.0         | 60.0       | 43    | 7         | 3.00    | 90.0         | 15.0       |
| 11    | 5         | 3.00    | 30.0         | 60.0       | 44    | 2         | 2.00    | 0.0          | 0.0        |
| 12    | 5         | 2.00    | 90.0         | 60.0       | 45    | 2         | 3.00    | 0.0          | 0.0        |
| 13    | 5         | 3.00    | 90.0         | 60.0       | 46    | 2         | 4.00    | 0.0          | 0.0        |
| 14    | 5         | 2.00    | 0.0          | 75.0       | 47    | 2         | 5.00    | 0.0          | 0.0        |
| 15    | 5         | 3.00    | 0.0          | 75.0       | 48    | 2         | 2.00    | 60.0         | 0.0        |
| 16    | 5         | 2.00    | 90.0         | 75.0       | 49    | 2         | 3.00    | 60.0         | 0.0        |
| 17    | 5         | 3.00    | 90.0         | 75.0       | 50    | 2         | 4.00    | 60.0         | 0.0        |
| 18    | 5         | 2.00    | 0.0          | 90.0       | 51    | 2         | 5.00    | 60.0         | 0.0        |
| 19    | 5         | 3.00    | 0.0          | 90.0       | 52    | 3         | 2.00    | 60.0         | 0.0        |
| 20    | 5         | 2.00    | 90.0         | 90.0       | 53    | 3         | 3.00    | 60.0         | 0.0        |
| 21    | 5         | 3.00    | 90.0         | 90.0       | 54    | 3         | 4.00    | 60.0         | 0.0        |
| 22    | 7         | 2.00    | 0.0          | 0.0        | 55    | 3         | 5.00    | 60.0         | 0.0        |
| 23    | 7         | 3.00    | 0.0          | 0.0        | 56    | 4         | 2.00    | 0.0          | 0.0        |
| 24    | 7         | 4.00    | 0.0          | 0.0        | 57    | 4         | 3.00    | 0.0          | 0.0        |
| 25    | 7         | 2.00    | 30.0         | 0.0        | 58    | 4         | 4.00    | 0.0          | 0.0        |
| 26    | 7         | 3.00    | 30.0         | 0.0        | 59    | 4         | 5.00    | 0.0          | 0.0        |
| 27    | 7         | 4.00    | 30.0         | 0.0        | 60    | 1         | 2.00    | 30.0         | 0.0        |
| 28    | 7         | 2.00    | 55.0         | 0.0        | 61    | 1         | 3.00    | 30.0         | 0.0        |
| 29    | 7         | 3.00    | 55.0         | 0.0        | 62    | 1         | 4.00    | 30.0         | 0.0        |
| 30    | 7         | 2.00    | 60.0         | 0.0        | 63    | 1         | 5.00    | 30.0         | 0.0        |
| 31    | 7         | 3.00    | 60.0         | 0.0        |       |           |         |              |            |
| 32    | 7         | 4.00    | 60.0         | 0.0        |       |           |         |              |            |
| 33    | 7         | 2.00    | 90.0         | 0.0        |       |           |         |              |            |



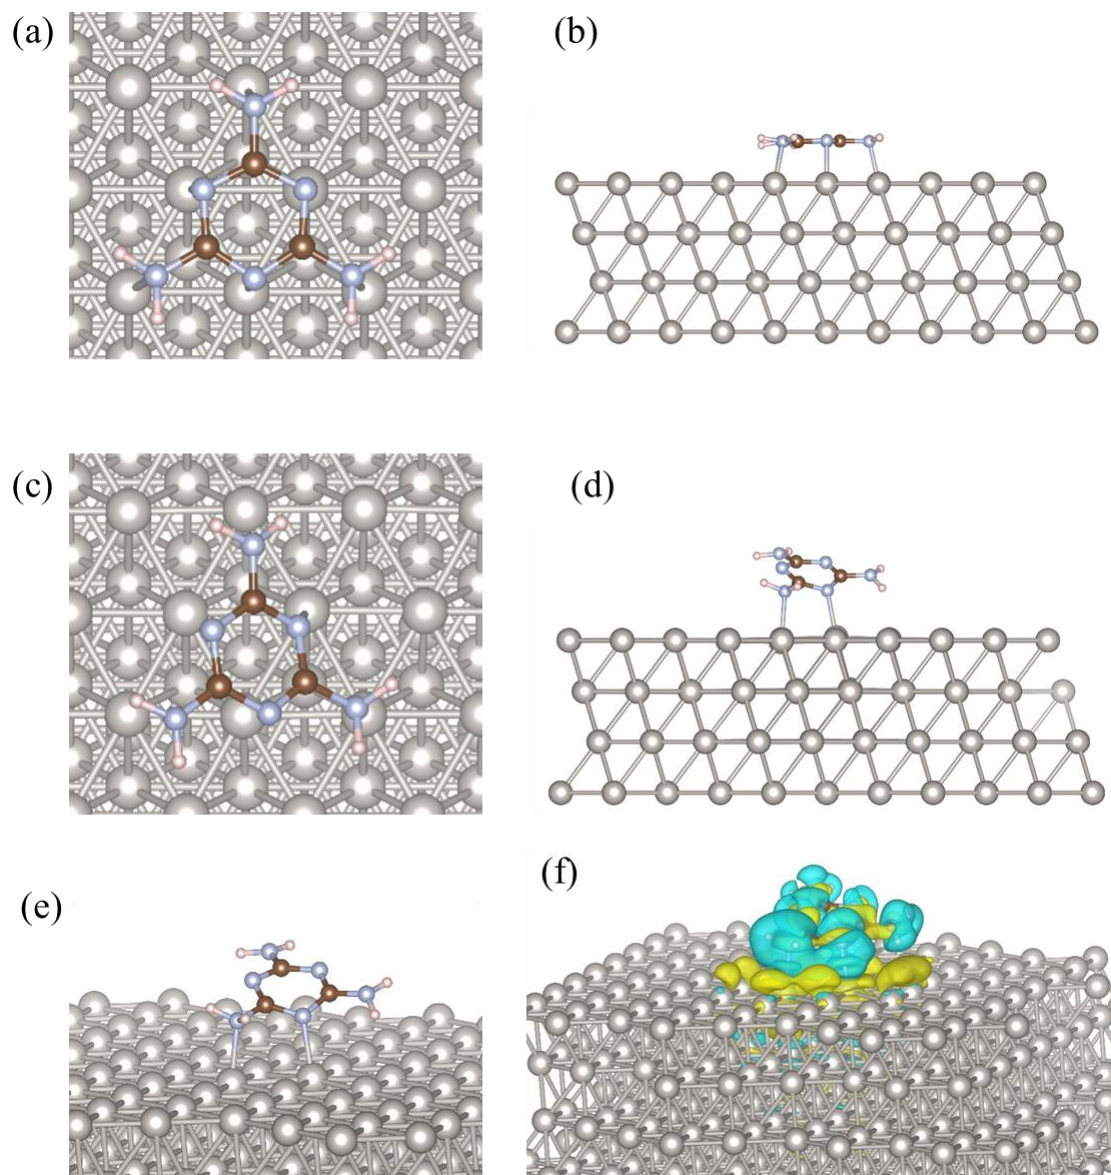

**Figure S23.** (a) Top and (b) side views of entry 1. (c) Top, (d) side, and (e) perspective views of the optimised structures of entry 1. (f) Charge difference distribution of the optimised structure with a threshold of  $0.001 \text{ e}^-/\text{Bohr}^3$ . Yellow and blue represent the decrease and increase of electron density, respectively. The grey, brown, blue, and white balls represent Pt, C, N, and H atoms, respectively.

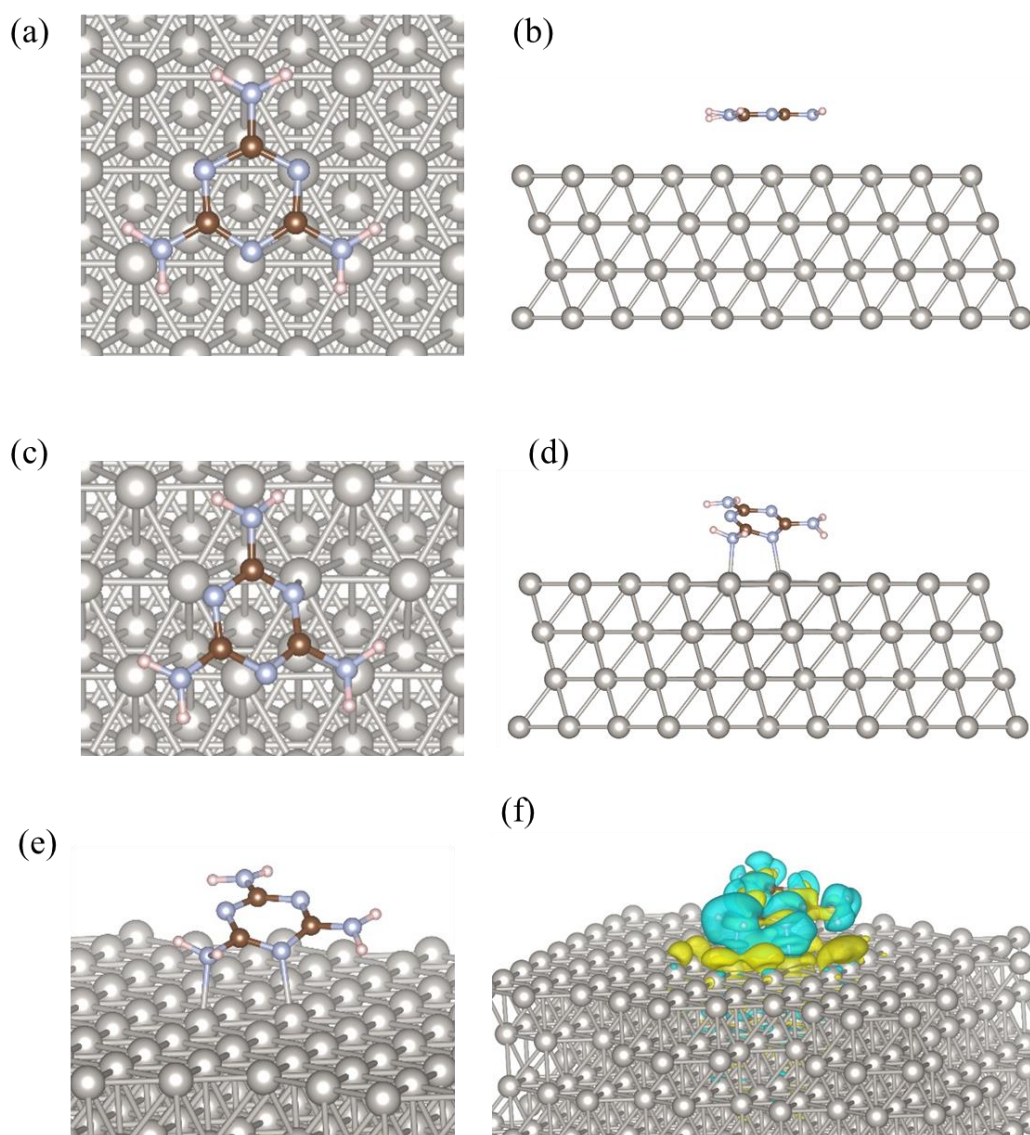

**Figure S24.** (a) Top and (b) side views of entry 2. (c) Top, (d) side, and (e) perspective views of the optimised structures of entry 2. (f) Charge difference distribution of the optimised structure with a threshold of  $0.001 \text{ e}^-/\text{Bohr}^3$ . Yellow and blue represent decrease and increase of electron density, respectively. The grey, brown, blue, and white balls represent Pt, C, N, and H atoms, respectively.

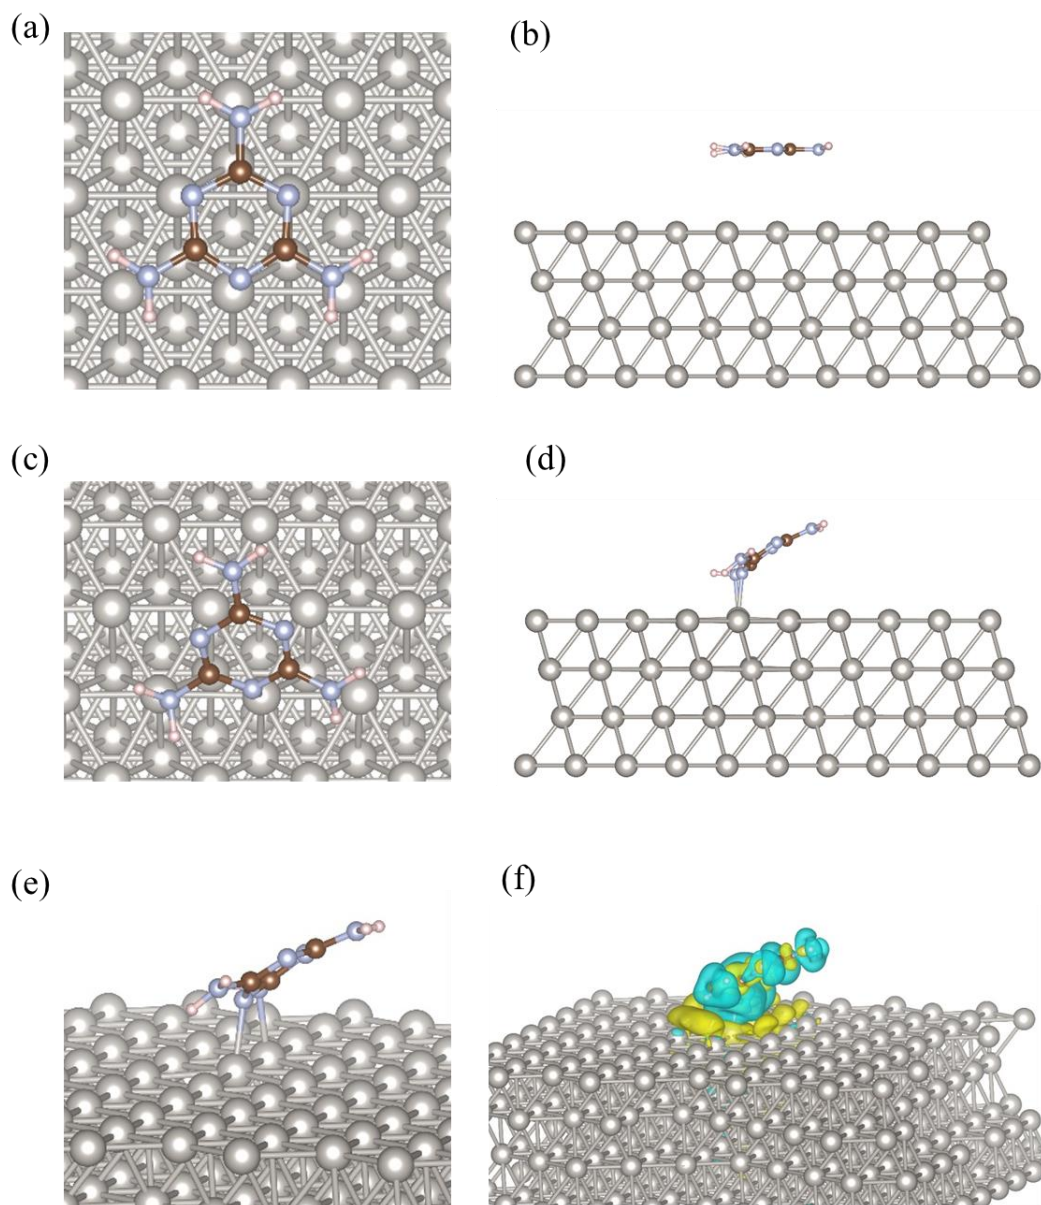

**Figure S25.** (a) Top and (b) side views of entry 3. (c) Top, (d) side, and (e) perspective views of the optimised structures of entry 3. (f) Charge difference distribution of the optimised structure with a threshold of  $0.001 \text{ e}^-/\text{Bohr}^3$ . Yellow and blue represent decrease and increase of electron density, respectively. The grey, brown, blue, and white balls represent Pt, C, N, and H atoms, respectively.

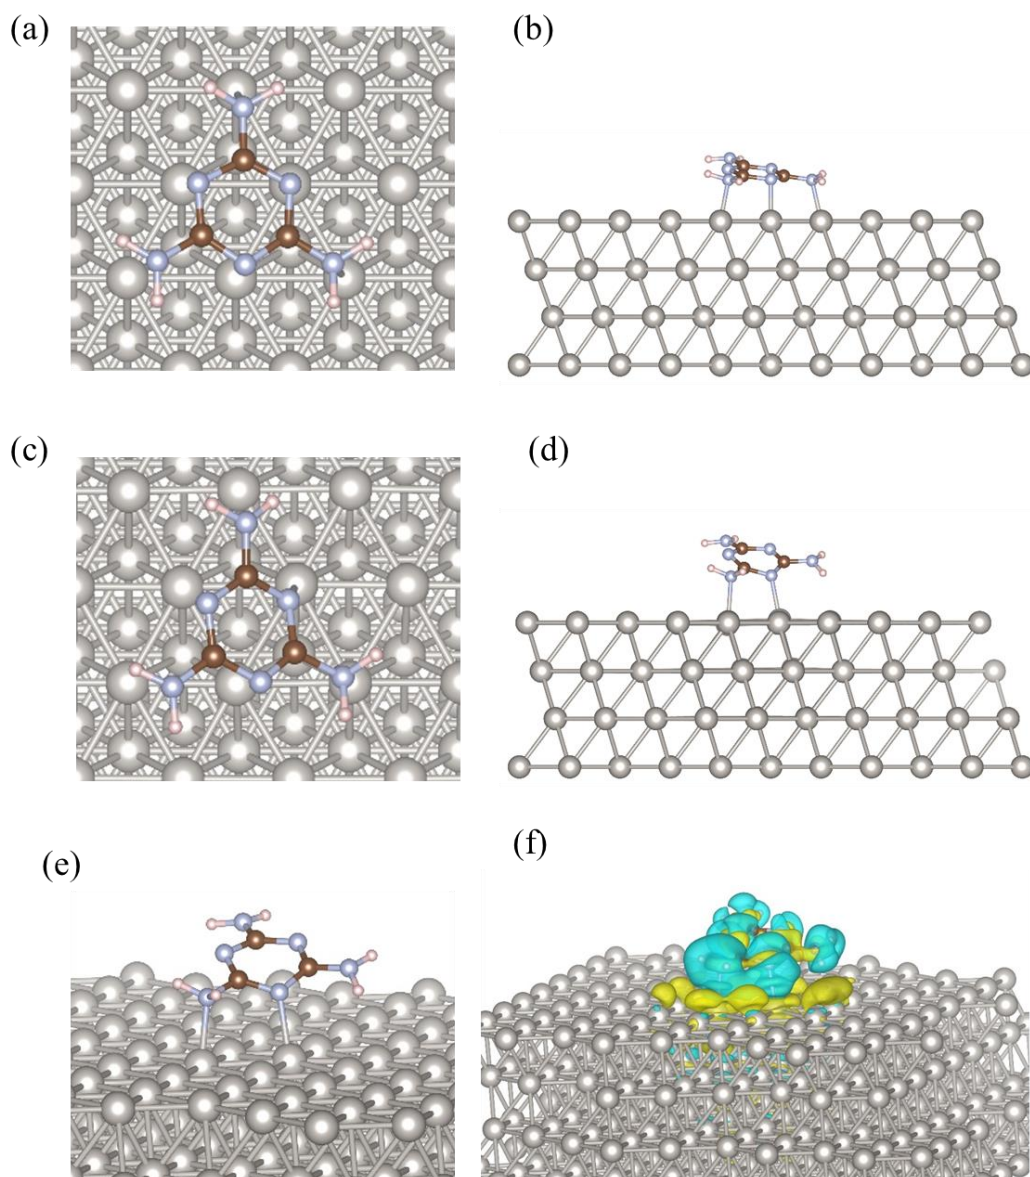

**Figure S26.** (a) Top and (b) side views of entry 4. (c) Top, (d) side, and (e) perspective views of the optimised structures of entry 4. (f) Charge difference distribution of the optimised structure with a threshold of  $0.001 \text{ e}^-/\text{Bohr}^3$ . Yellow and blue represent decrease and increase of electron density, respectively. The grey, brown, blue, and white balls represent Pt, C, N, and H atoms, respectively.

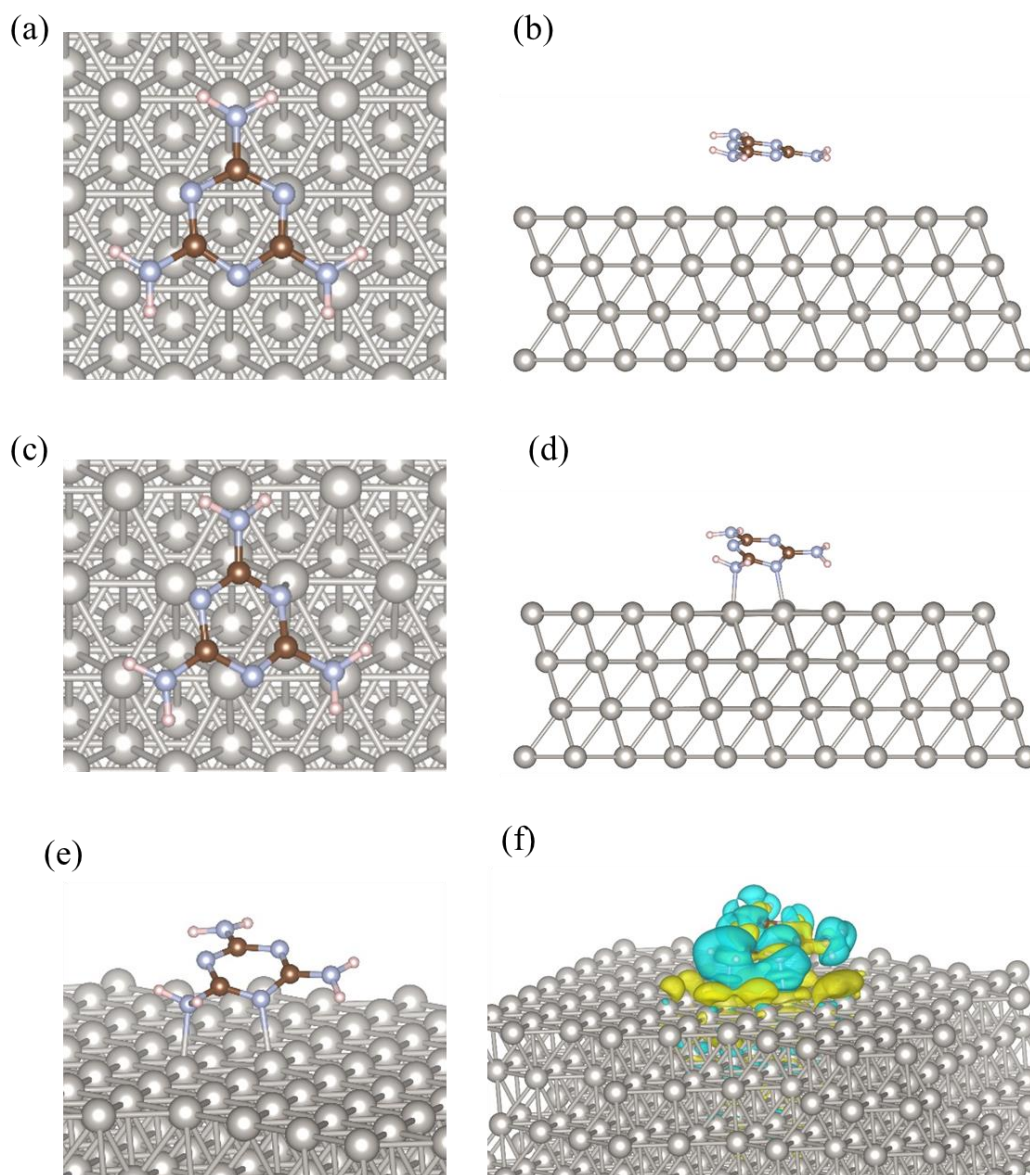

**Figure S27.** (a) Top and (b) side views of entry 5. (c) Top, (d) side, and (e) perspective views of the optimised structures of entry 5. (f) Charge difference distribution of the optimised structure with a threshold of  $0.001 \text{ e}^-/\text{Bohr}^3$ . Yellow and blue represent decrease and increase of electron density, respectively. The grey, brown, blue, and white balls represent Pt, C, N, and H atoms, respectively.

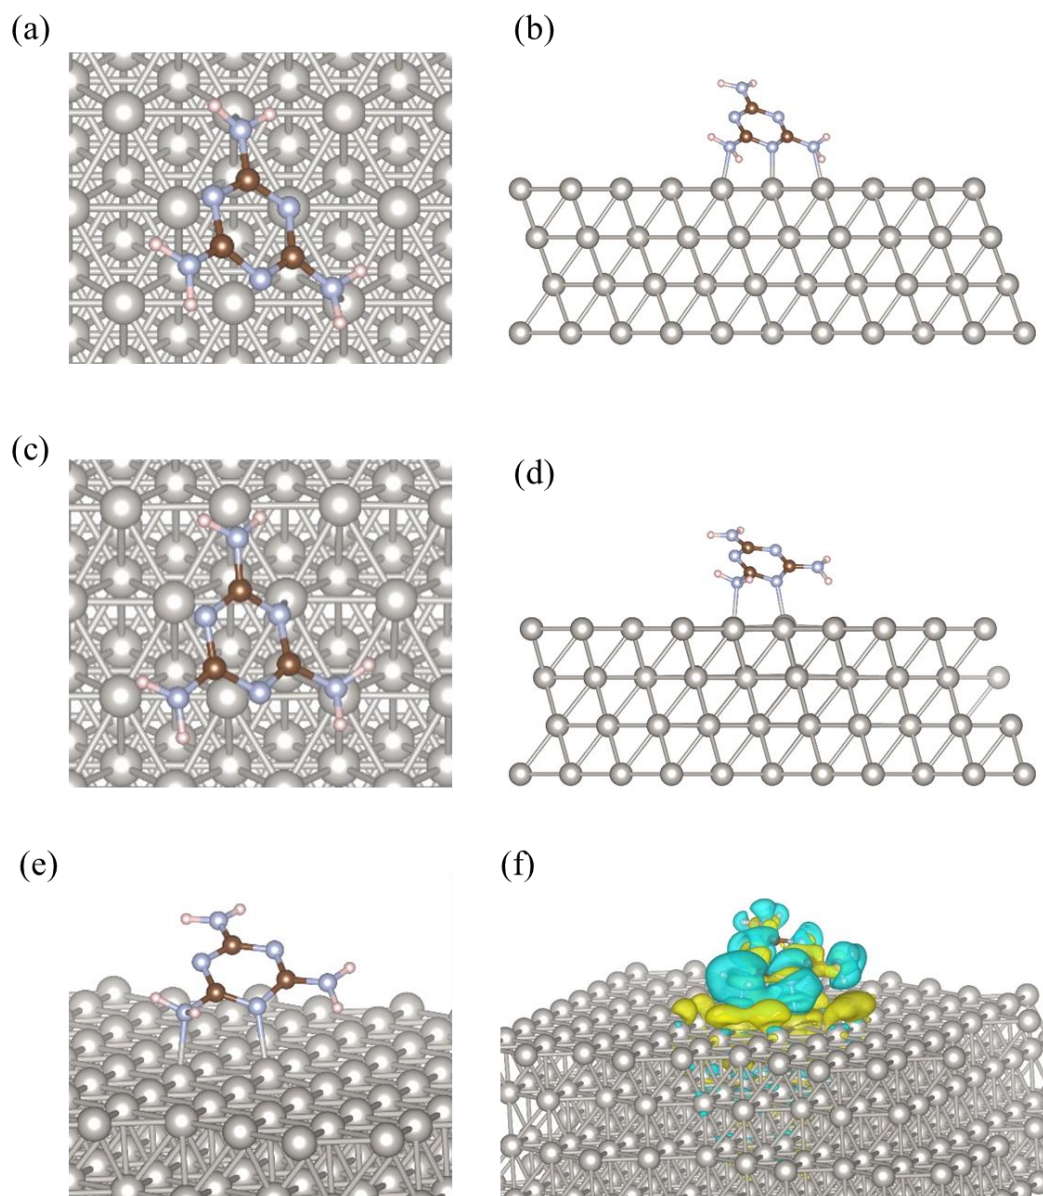

**Figure S28.** (a) Top and (b) side views of entry 6. (c) Top, (d) side, and (e) perspective views of the optimised structures of entry 6. (f) Charge difference distribution of the optimised structure with a threshold of  $0.001 \text{ e}^-/\text{Bohr}^3$ . Yellow and blue represent decrease and increase of electron density, respectively. The grey, brown, blue, and white balls represent Pt, C, N, and H atoms, respectively.

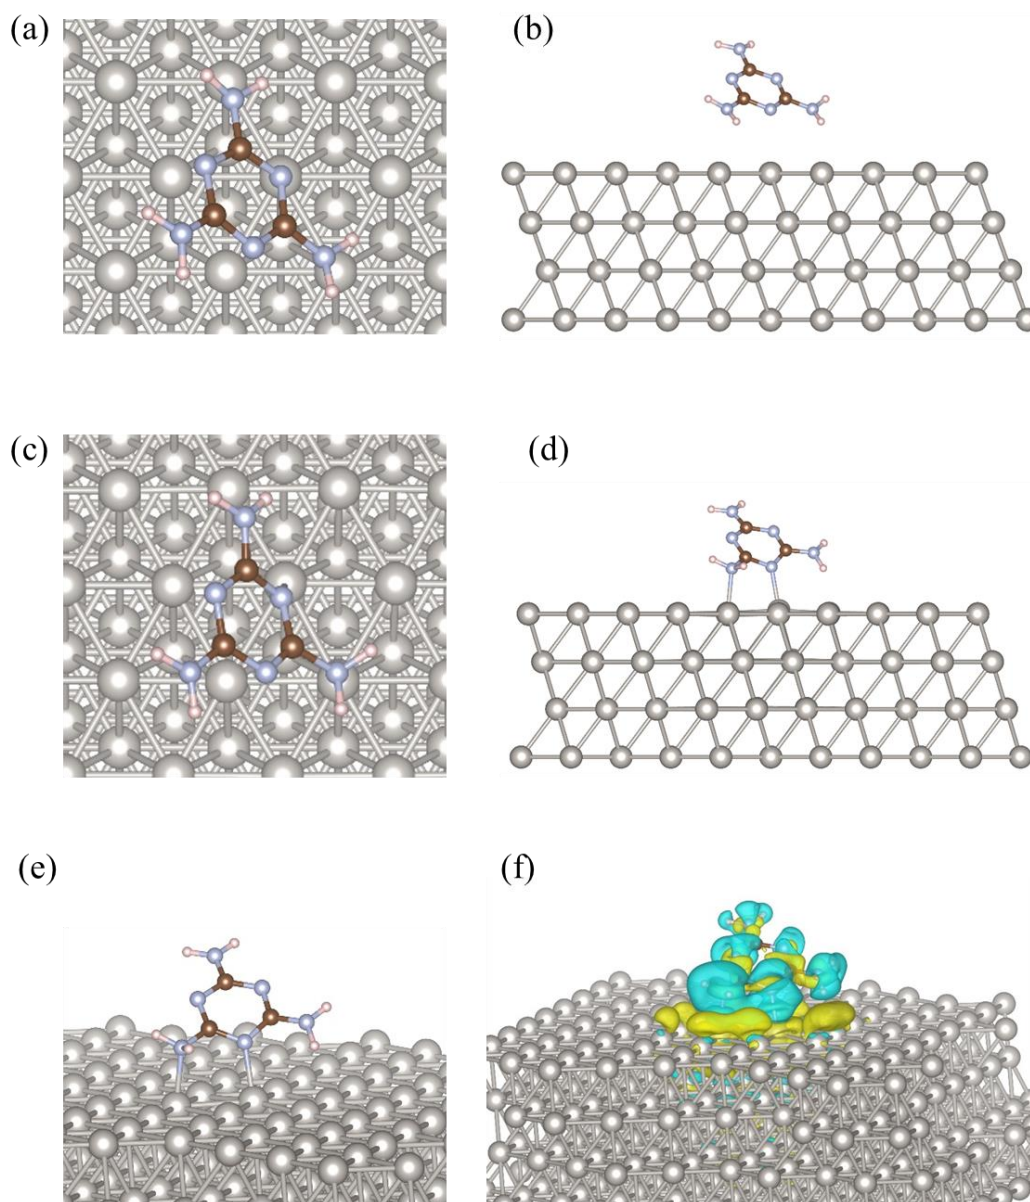

**Figure S29.** (a) Top and (b) side views of entry 7. (c) Top, (d) side, and (e) perspective views of the optimised structures of entry 7. (f) Charge difference distribution of the optimised structure with a threshold of  $0.001 e^-/\text{Bohr}^3$ . Yellow and blue represent decrease and increase of electron density, respectively. The grey, brown, blue, and white balls represent Pt, C, N, and H atoms, respectively.

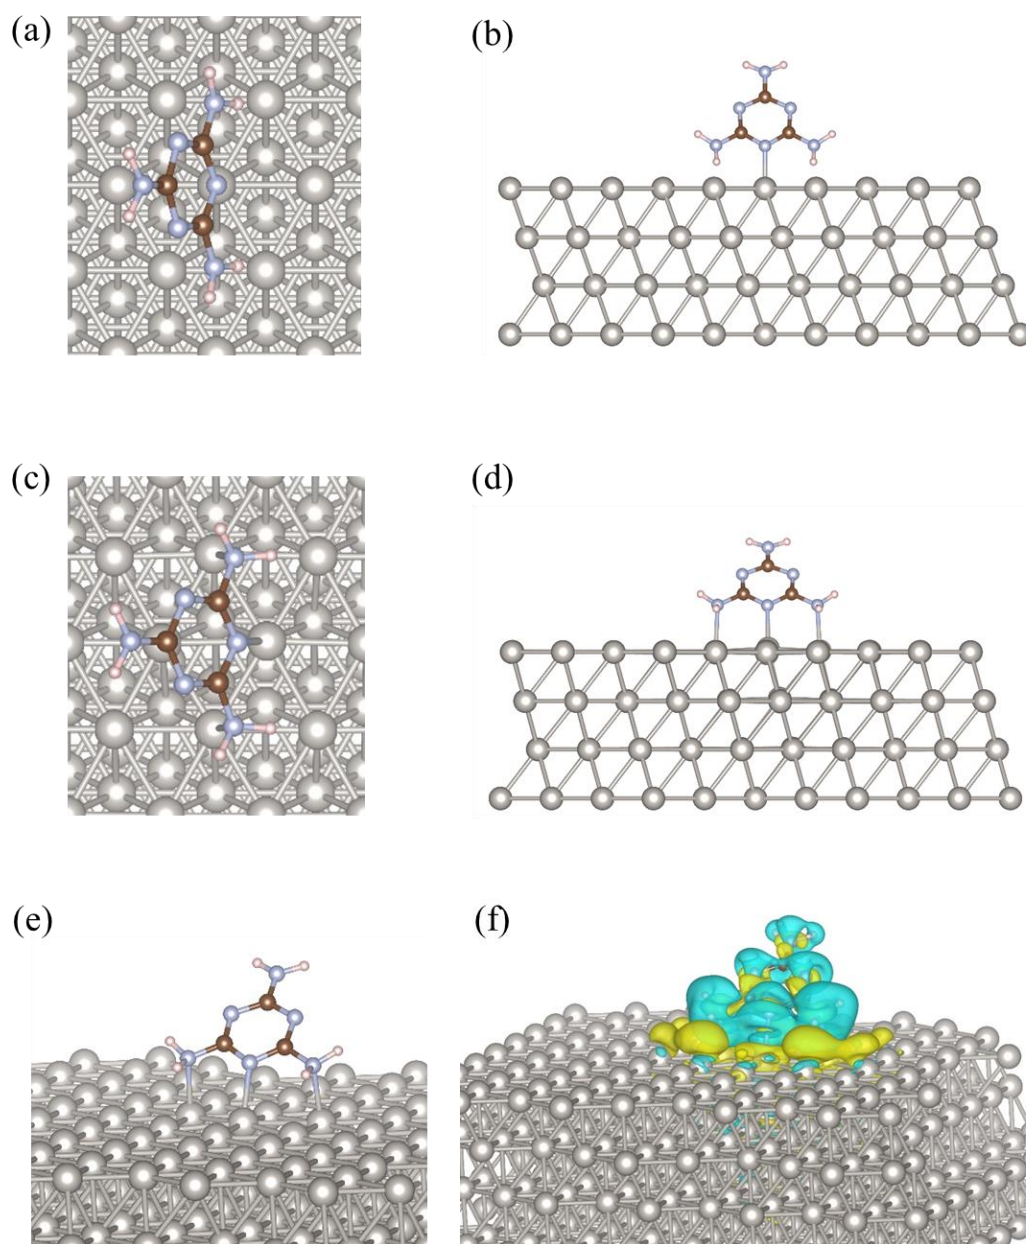

**Figure S30.** (a) Top and (b) side views of entry 8. (c) Top, (d) side, and (e) perspective views of the optimised structures of entry 8. (f) Charge difference distribution of the optimised structure with a threshold of  $0.001 e^-/\text{Bohr}^3$ . Yellow and blue represent decrease and increase of electron density, respectively. The grey, brown, blue, and white balls represent Pt, C, N, and H atoms, respectively.



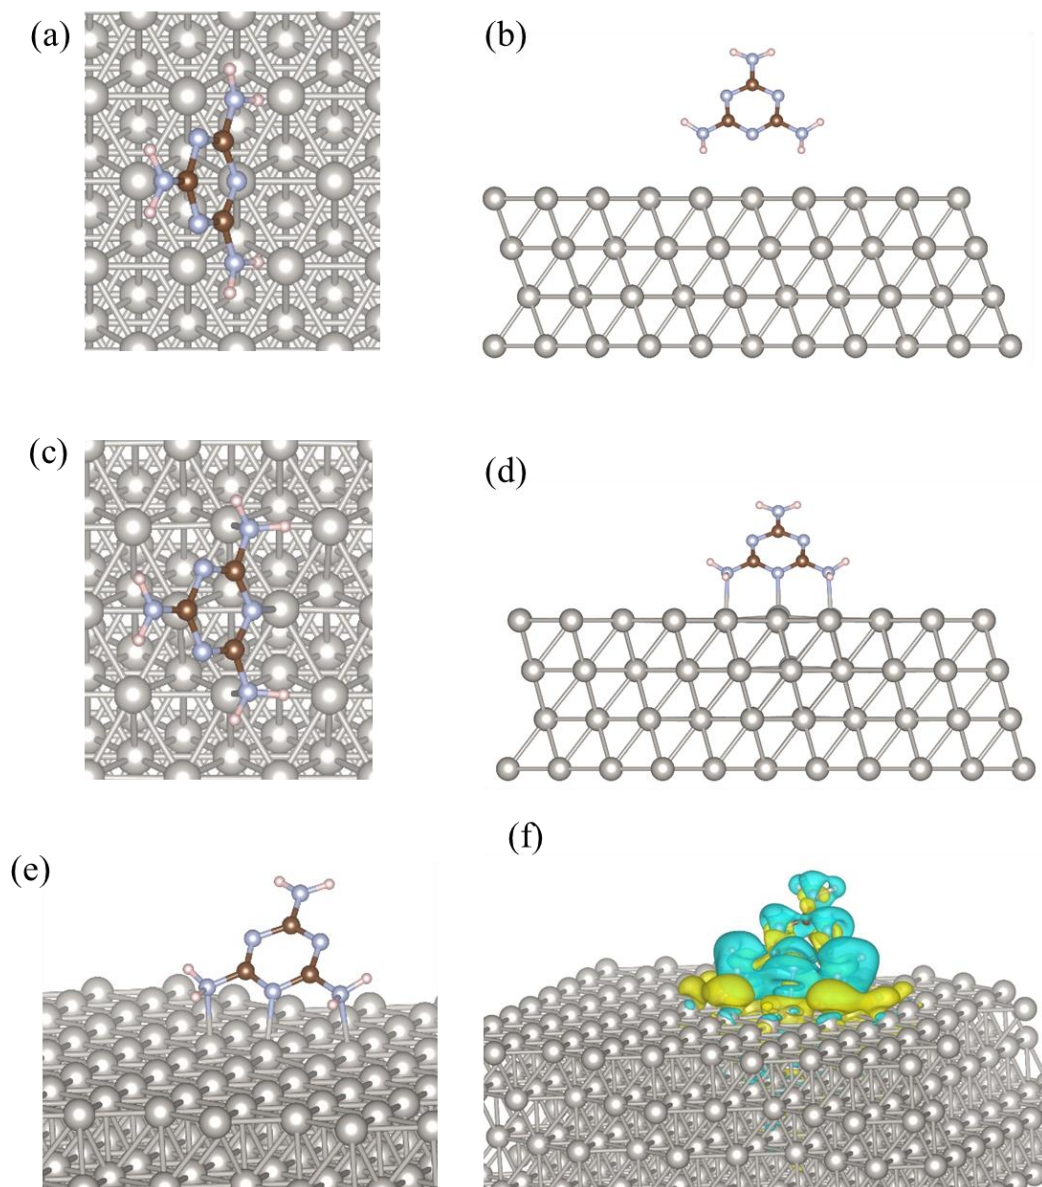

**Figure S31.** (a) Top and (b) side views of entry 9. (c) Top, (d) side, and (e) perspective views of the optimised structures of entry 9. (f) Charge difference distribution of the optimised structure with a threshold of  $0.001 e^-/\text{Bohr}^3$ . Yellow and blue represent decrease and increase of electron density, respectively. The grey, brown, blue, and white balls represent Pt, C, N, and H atoms, respectively.

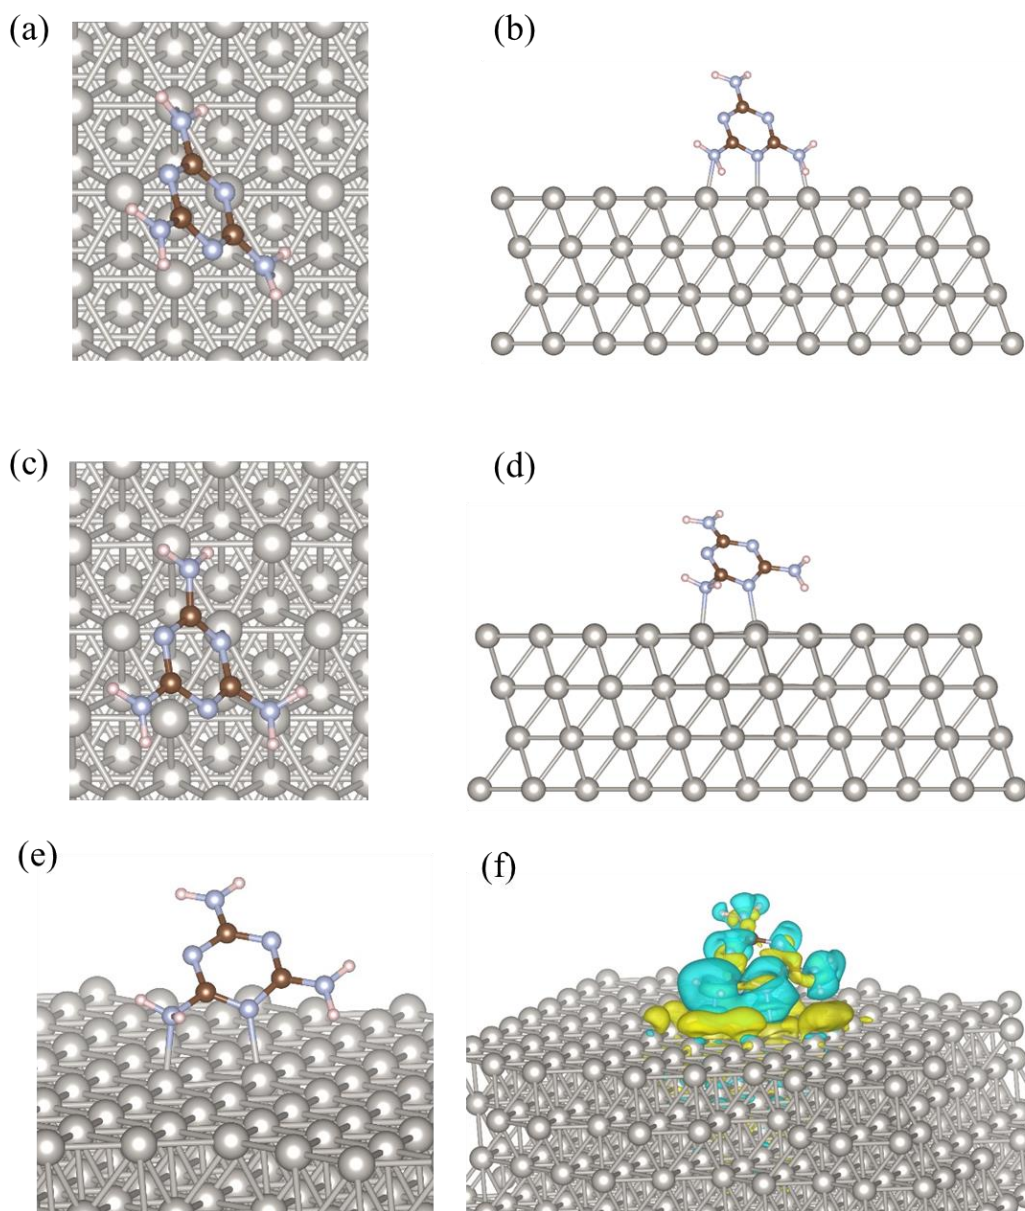

**Figure S32.** (a) Top and (b) side views of entry 10. (c) Top, (d) side, and (e) perspective views of the optimised structures of entry 10. (f) Charge difference distribution of the optimised structure with a threshold of  $0.001 e^-/\text{Bohr}^3$ . Yellow and blue represent decrease and increase of electron density, respectively. The grey, brown, blue, and white balls represent Pt, C, N, and H atoms, respectively.

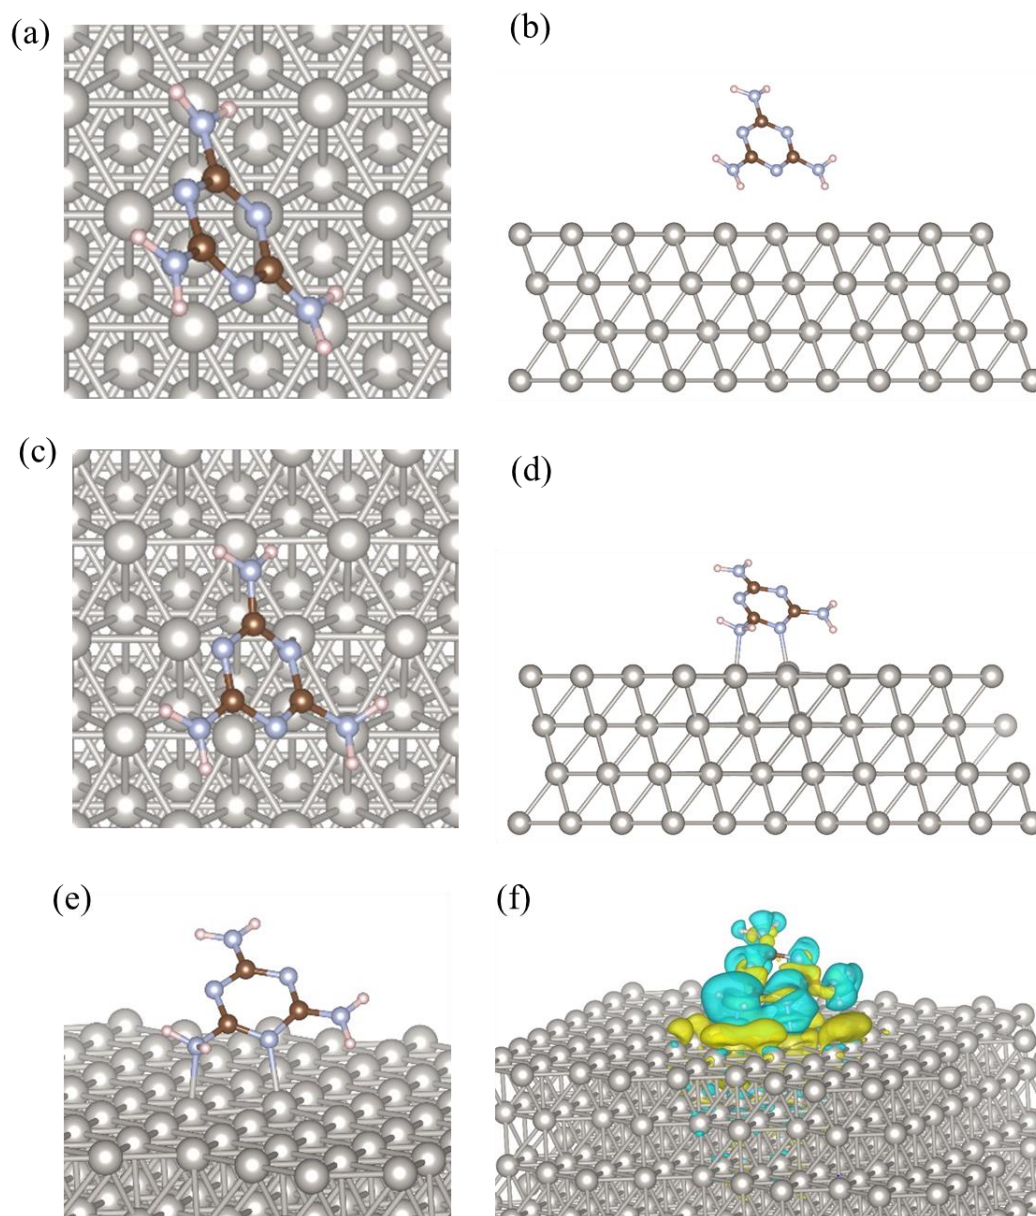

**Figure S33.** (a) Top and (b) side views of entry 11. (c) Top, (d) side, and (e) perspective views of the optimised structures of entry 11. (f) Charge difference distribution of the optimised structure with a threshold of  $0.001 e^-/\text{Bohr}^3$ . Yellow and blue represent decrease and increase of electron density, respectively. The grey, brown, blue, and white balls represent Pt, C, N, and H atoms, respectively.

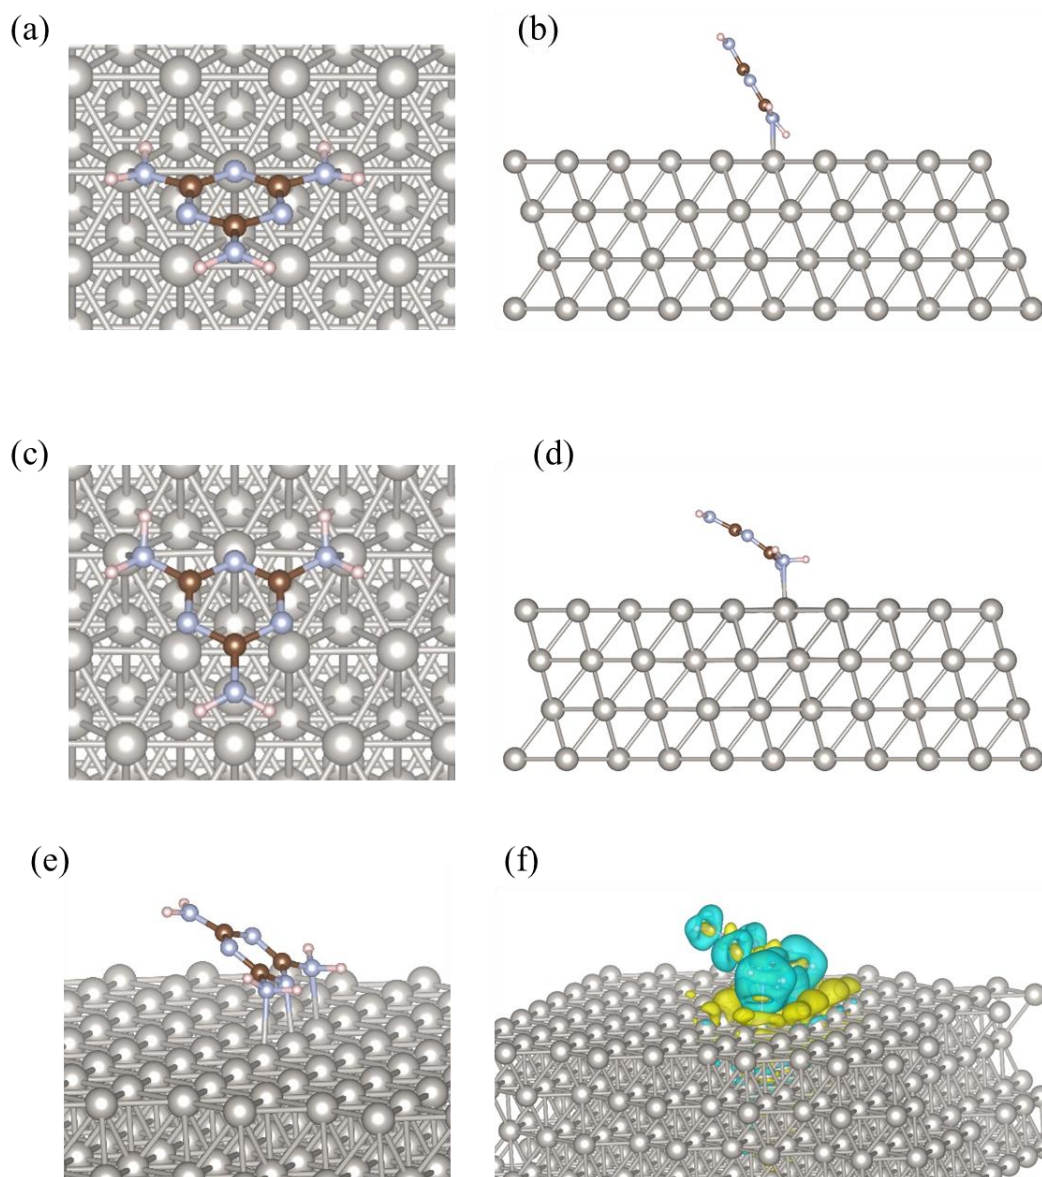

**Figure S34.** (a) Top and (b) side views of entry 12. (c) Top, (d) side, and (e) perspective views of the optimised structures of entry 12. (f) Charge difference distribution of the optimised structure with a threshold of  $0.001 e^-/\text{Bohr}^3$ . Yellow and blue represent decrease and increase of electron density, respectively. The grey, brown, blue, and white balls represent Pt, C, N, and H atoms, respectively.

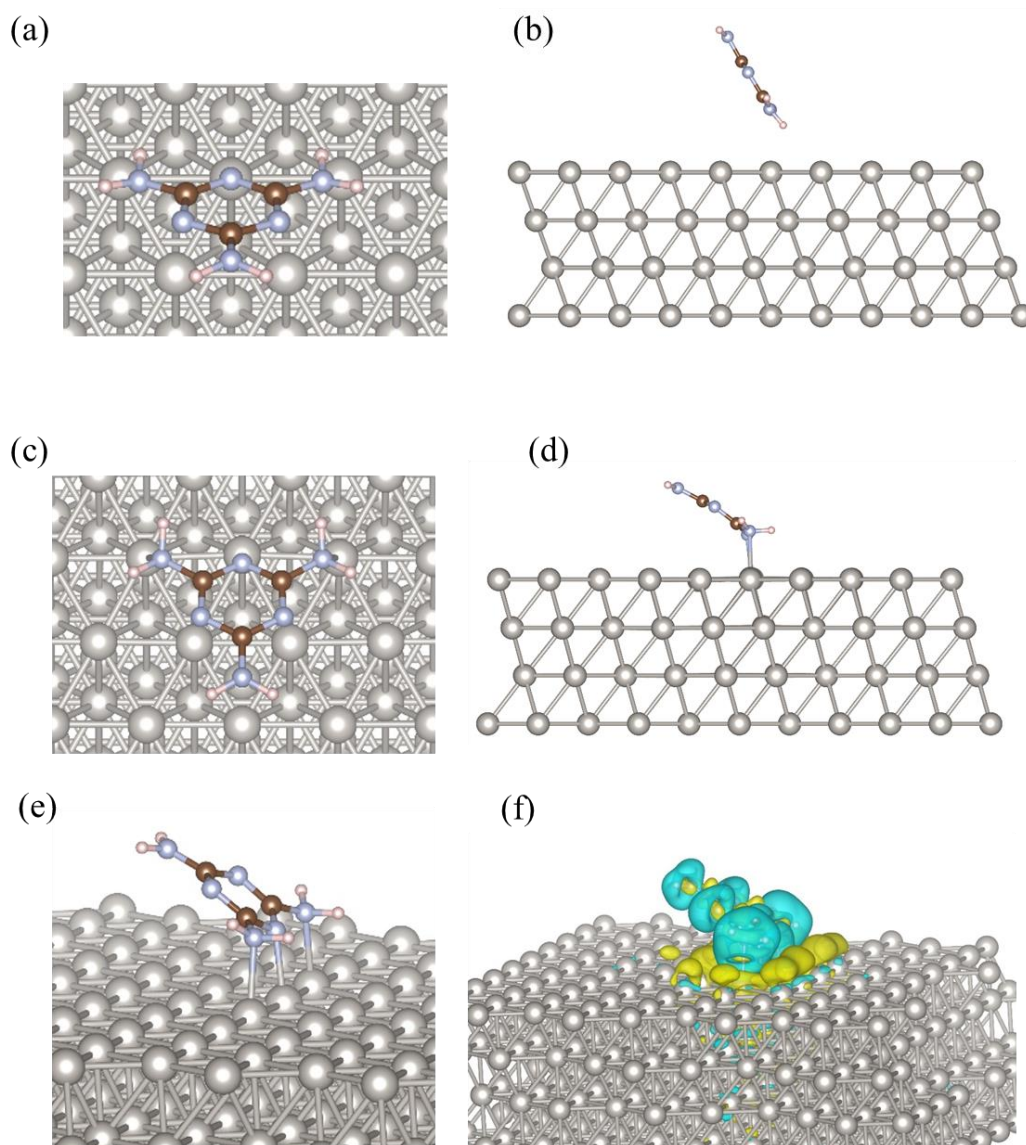

**Figure S35.** (a) Top and (b) side views of entry 13. (c) Top, (d) side, and (e) perspective views of the optimised structures of entry 13. (f) Charge difference distribution of the optimised structure with a threshold of  $0.001 e^-/\text{Bohr}^3$ . Yellow and blue represent decrease and increase of electron density, respectively. The grey, brown, blue, and white balls represent Pt, C, N, and H atoms, respectively.

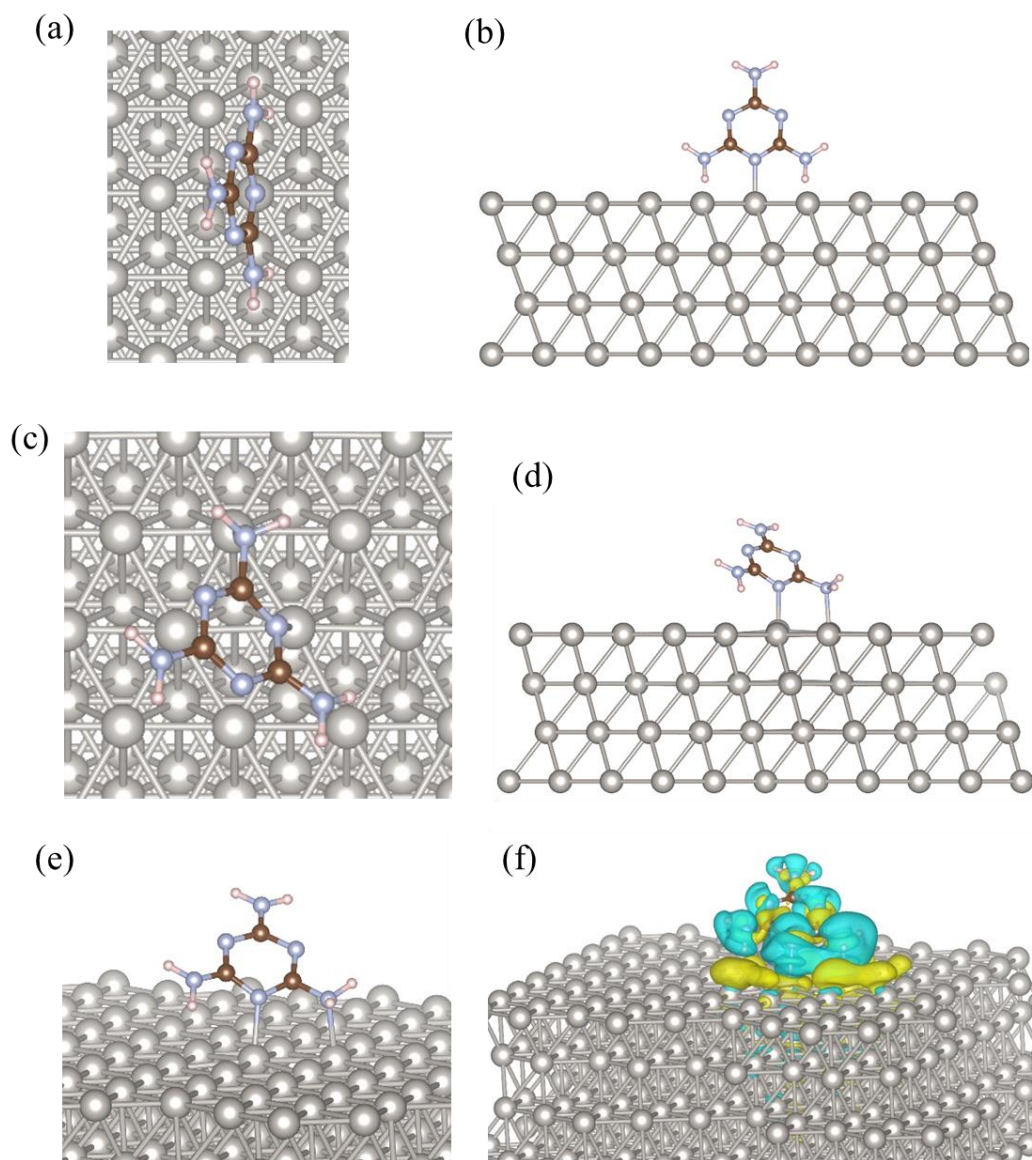

**Figure S36.** (a) Top and (b) side views of entry 14. (c) Top, (d) side, and (e) perspective views of the optimised structures of entry 14. (f) Charge difference distribution of the optimised structure with a threshold of  $0.001 e^-/\text{Bohr}^3$ . Yellow and blue represent decrease and increase of electron density, respectively. The grey, brown, blue, and white balls represent Pt, C, N, and H atoms, respectively.

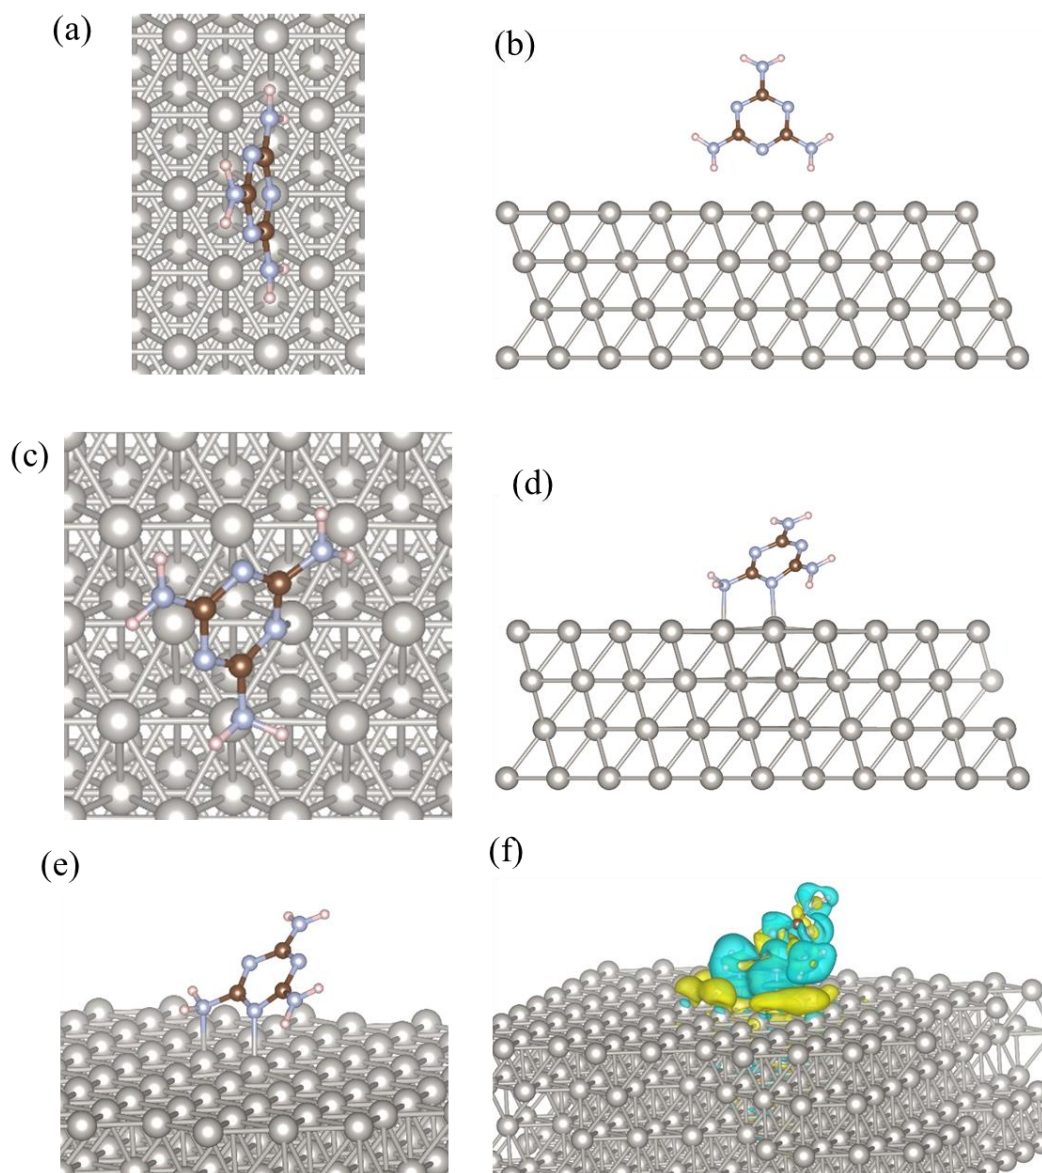

**Figure S37.** (a) Top and (b) side views of entry 15. (c) Top, (d) side, and (e) perspective views of the optimised structures of entry 15. (f) Charge difference distribution of the optimised structure with a threshold of  $0.001 e^-/\text{Bohr}^3$ . Yellow and blue represent decrease and increase of electron density, respectively. The grey, brown, blue, and white balls represent Pt, C, N, and H atoms, respectively.

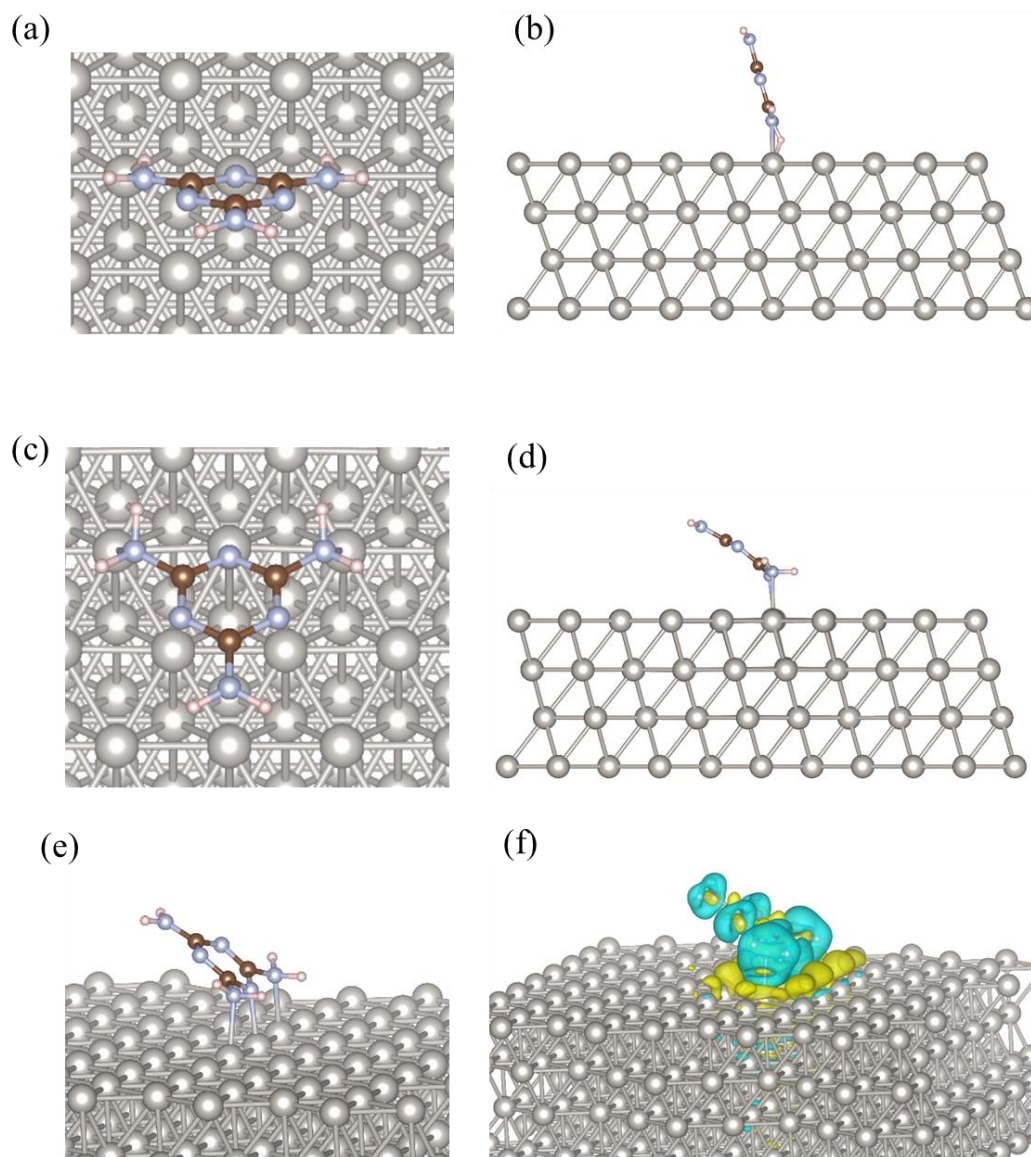

**Figure S38.** (a) Top and (b) side views of entry 16. (c) Top, (d) side, and (e) perspective views of the optimised structures of entry 16. (f) Charge difference distribution of the optimised structure with a threshold of  $0.001 e^-/\text{Bohr}^3$ . Yellow and blue represent decrease and increase of electron density, respectively. The grey, brown, blue, and white balls represent Pt, C, N, and H atoms, respectively.



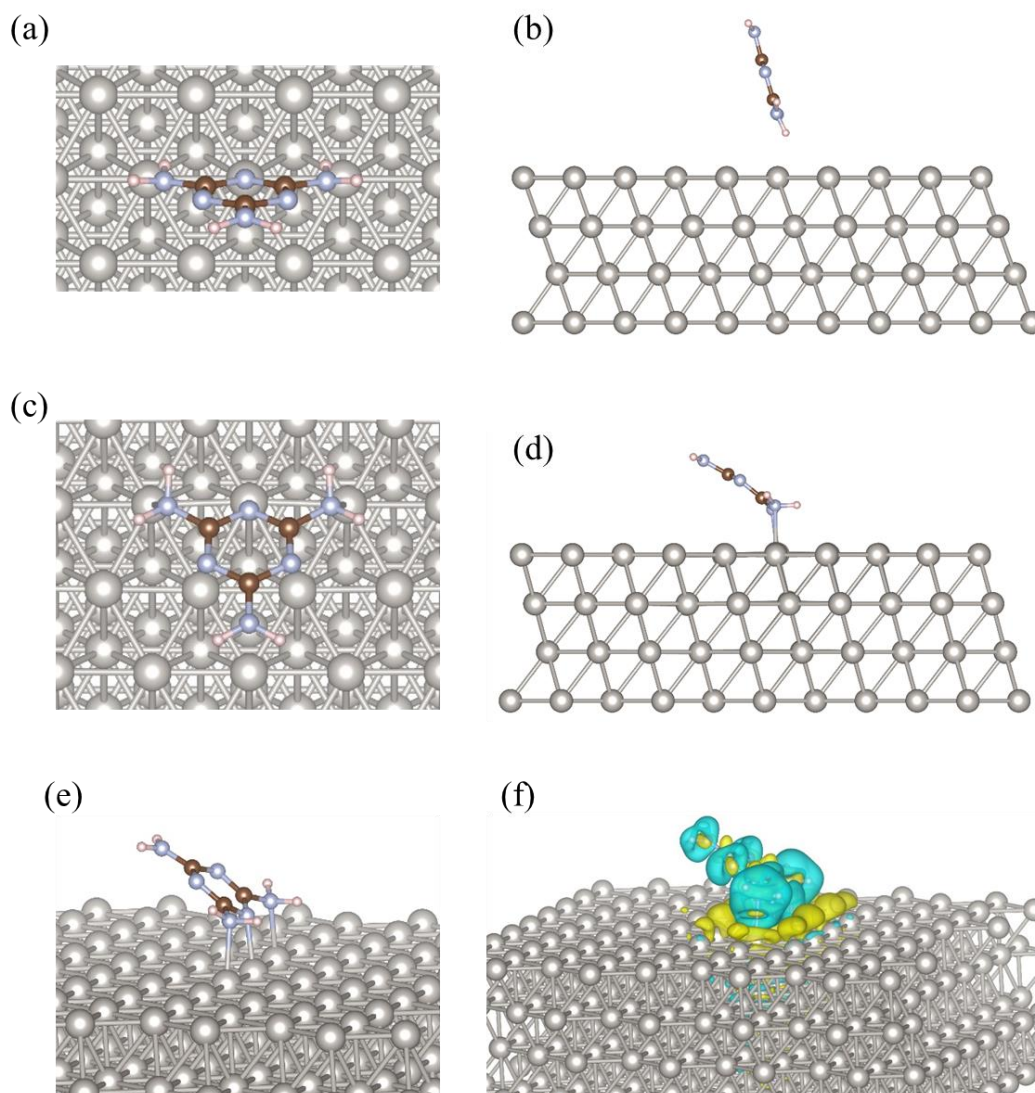

**Figure S39.** (a) Top and (b) side views of entry 17. (c) Top, (d) side, and (e) perspective views of the optimised structures of entry 17. (f) Charge difference distribution of the optimised structure with a threshold of  $0.001 e^-/\text{Bohr}^3$ . Yellow and blue represent decrease and increase of electron density, respectively. The grey, brown, blue, and white balls represent Pt, C, N, and H atoms, respectively.

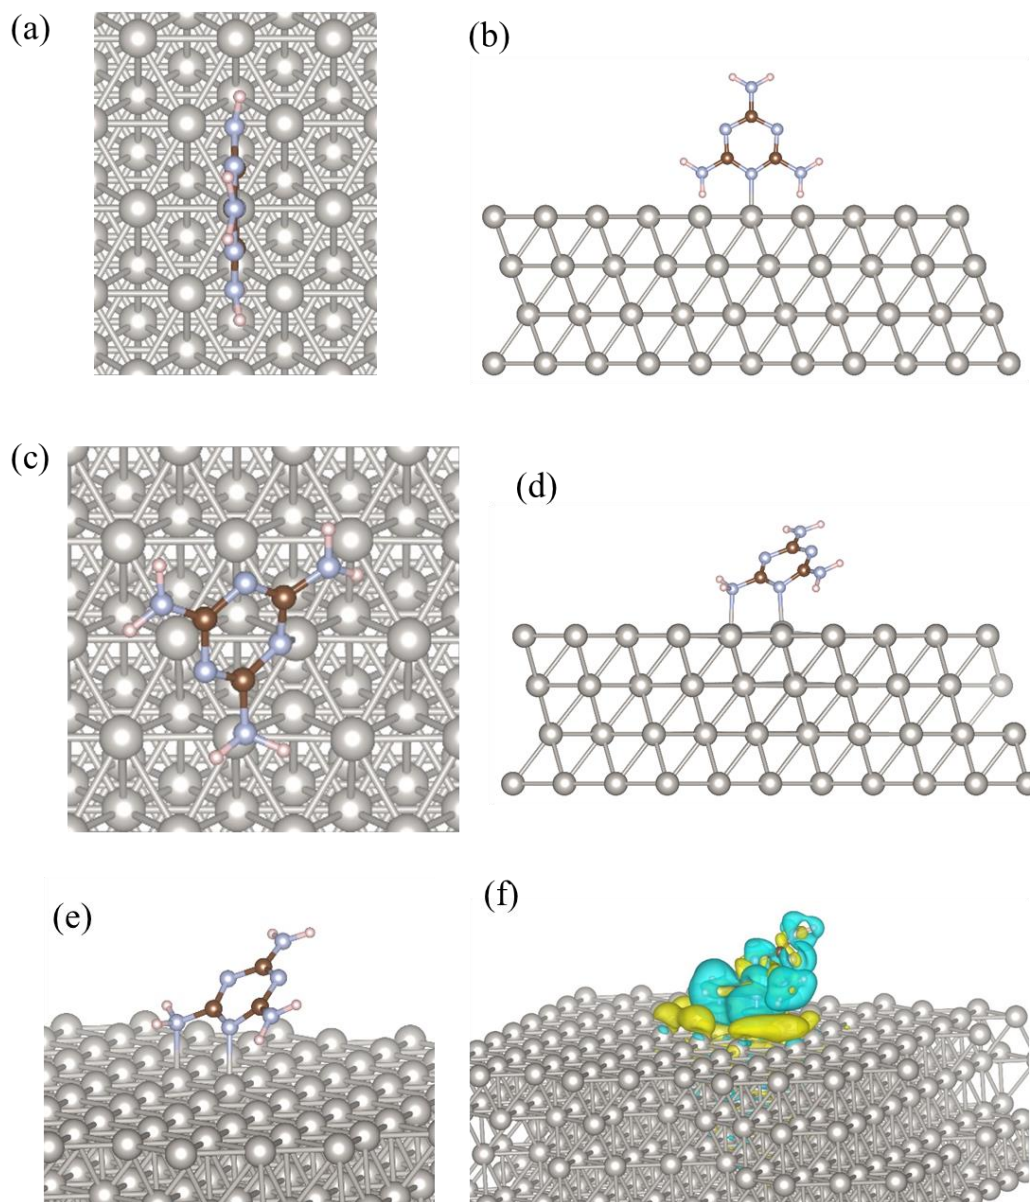

**Figure S40.** (a) Top and (b) side views of entry 18. (c) Top, (d) side, and (e) perspective views of the optimised structures of entry 18. (f) Charge difference distribution of the optimised structure with a threshold of  $0.001 e^-/\text{Bohr}^3$ . Yellow and blue represent decrease and increase of electron density, respectively. The grey, brown, blue, and white balls represent Pt, C, N, and H atoms, respectively.

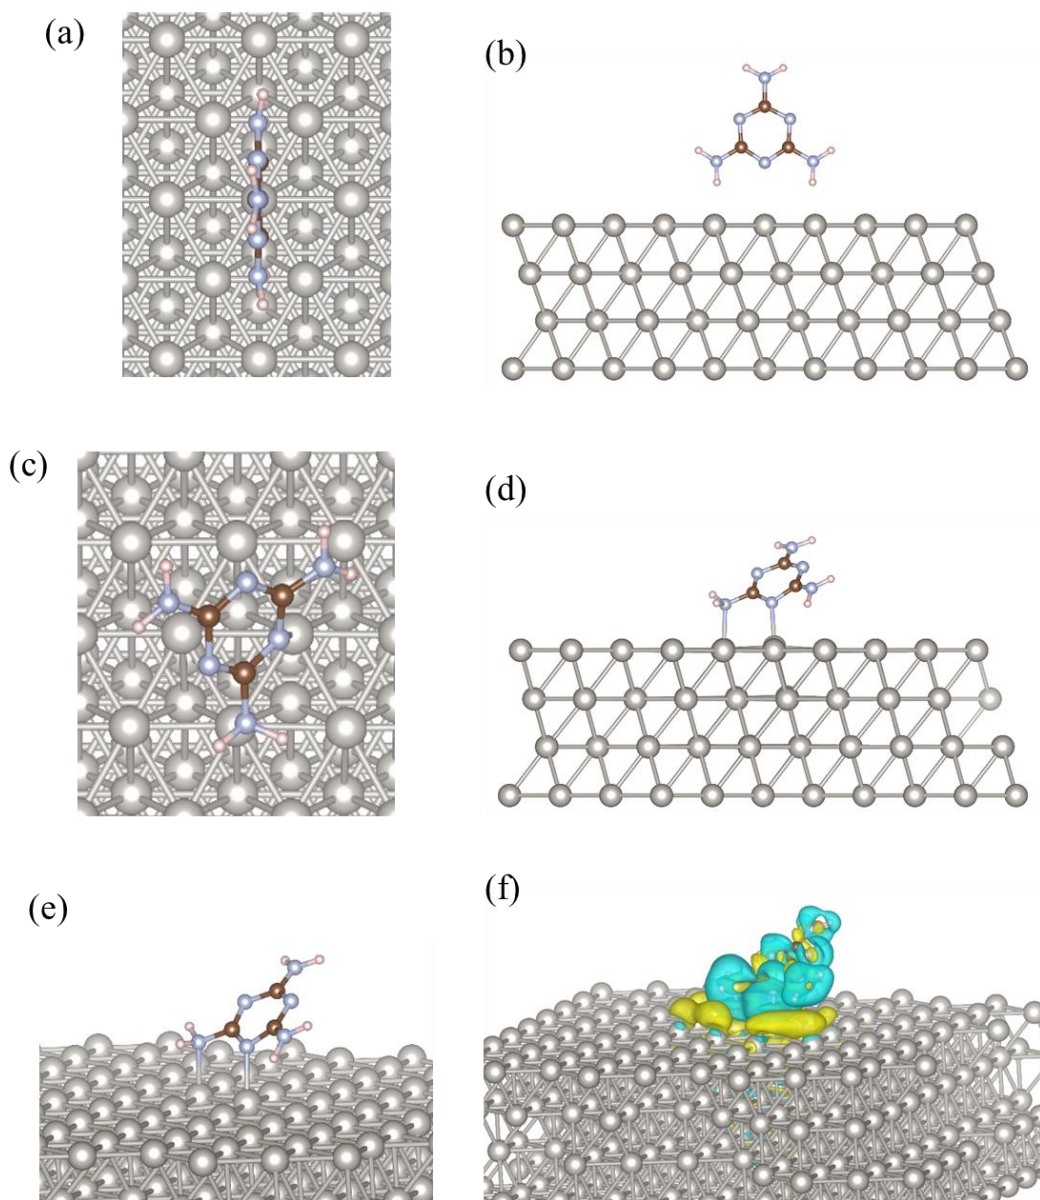

**Figure S41.** (a) Top and (b) side views of entry 19. (c) Top, (d) side, and (e) perspective views of the optimised structures of entry 19. (f) Charge difference distribution of the optimised structure with a threshold of  $0.001 e^-/\text{Bohr}^3$ . Yellow and blue represent decrease and increase of electron density, respectively. The grey, brown, blue, and white balls represent Pt, C, N, and H atoms, respectively.

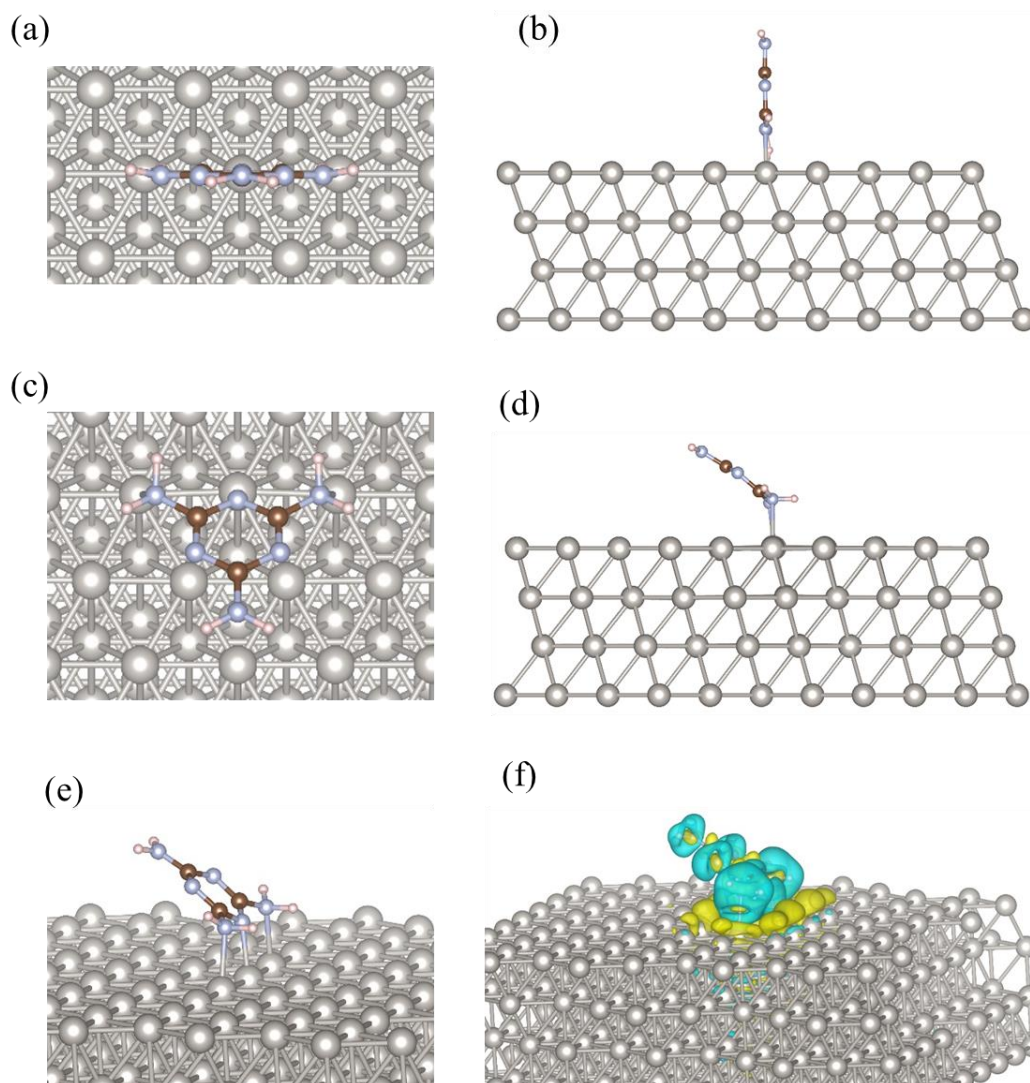

**Figure S42.** (a) Top and (b) side views of entry 20. (c) Top, (d) side, and (e) perspective views of the optimised structures of entry 20. (f) Charge difference distribution of the optimised structure with a threshold of  $0.001 e^-/\text{Bohr}^3$ . Yellow and blue represent decrease and increase of electron density, respectively. The grey, brown, blue, and white balls represent Pt, C, N, and H atoms, respectively.

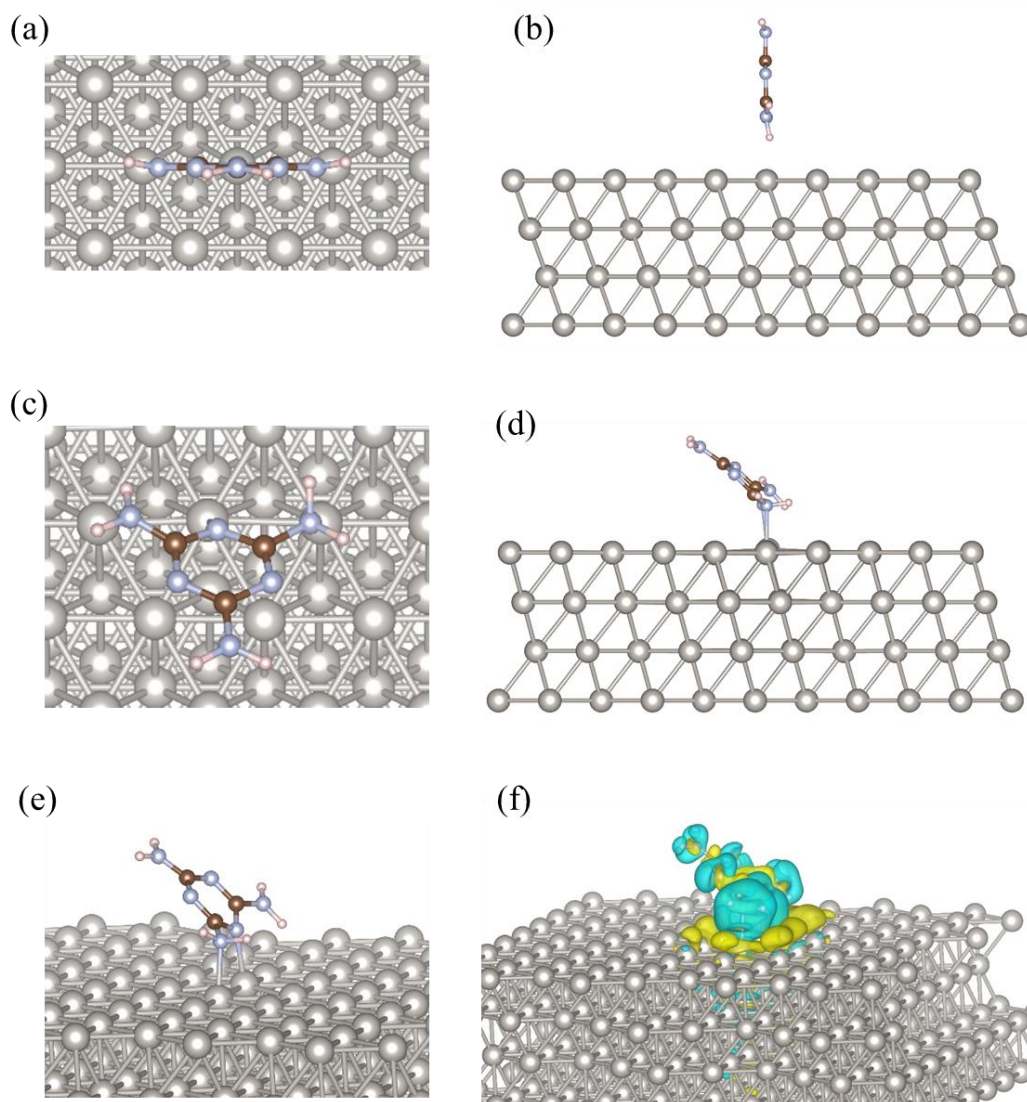

**Figure S43.** (a) Top and (b) side views of entry 21. (c) Top, (d) side, and (e) perspective views of the optimised structures of entry 21. (f) Charge difference distribution of the optimised structure with a threshold of  $0.001 e^-/\text{Bohr}^3$ . Yellow and blue represent decrease and increase of electron density, respectively. The grey, brown, blue, and white balls represent Pt, C, N, and H atoms, respectively.

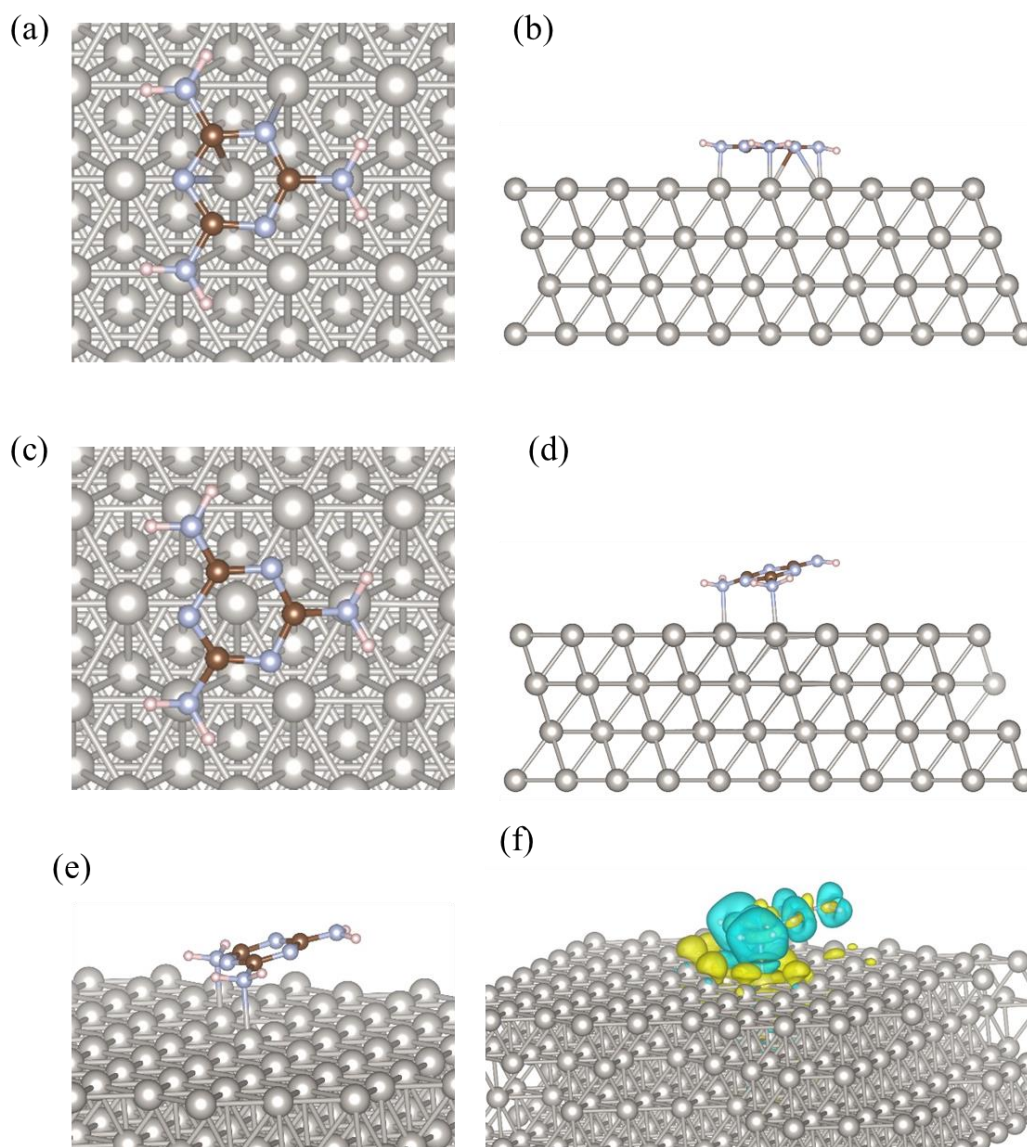

**Figure S44.** (a) Top and (b) side views of entry 22. (c) Top, (d) side, and (e) perspective views of the optimised structures of entry 22. (f) Charge difference distribution of the optimised structure with a threshold of  $0.001 e^-/\text{Bohr}^3$ . Yellow and blue represent decrease and increase of electron density, respectively. The grey, brown, blue, and white balls represent Pt, C, N, and H atoms, respectively.

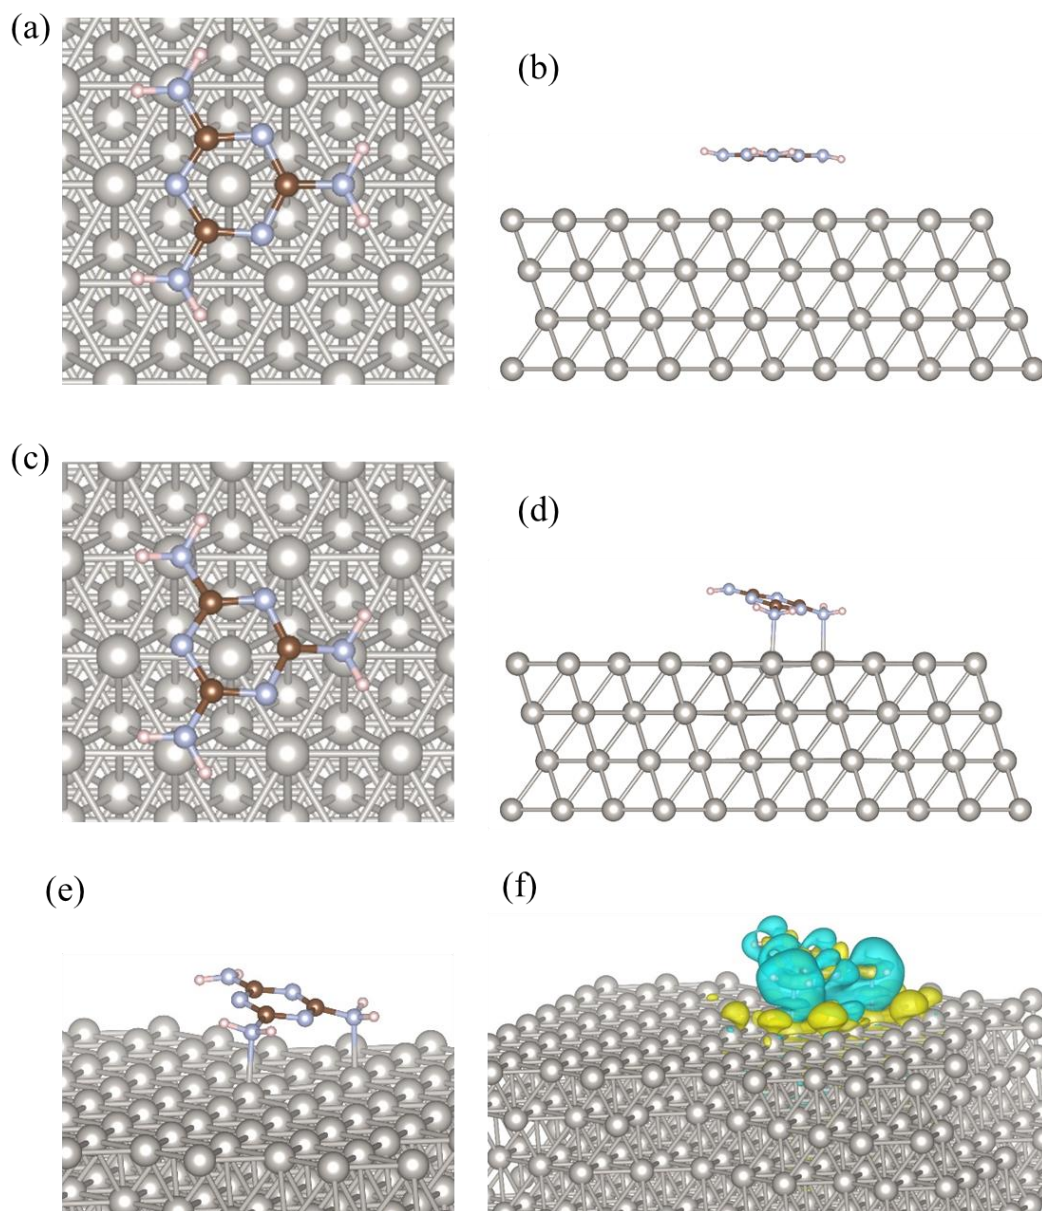

**Figure S45.** (a) Top and (b) side views of entry 23. (c) Top, (d) side, and (e) perspective views of the optimised structures of entry 23. (f) Charge difference distribution of the optimised structure with a threshold of  $0.001 e^-/\text{Bohr}^3$ . Yellow and blue represent decrease and increase of electron density, respectively. The grey, brown, blue, and white balls represent Pt, C, N, and H atoms, respectively.

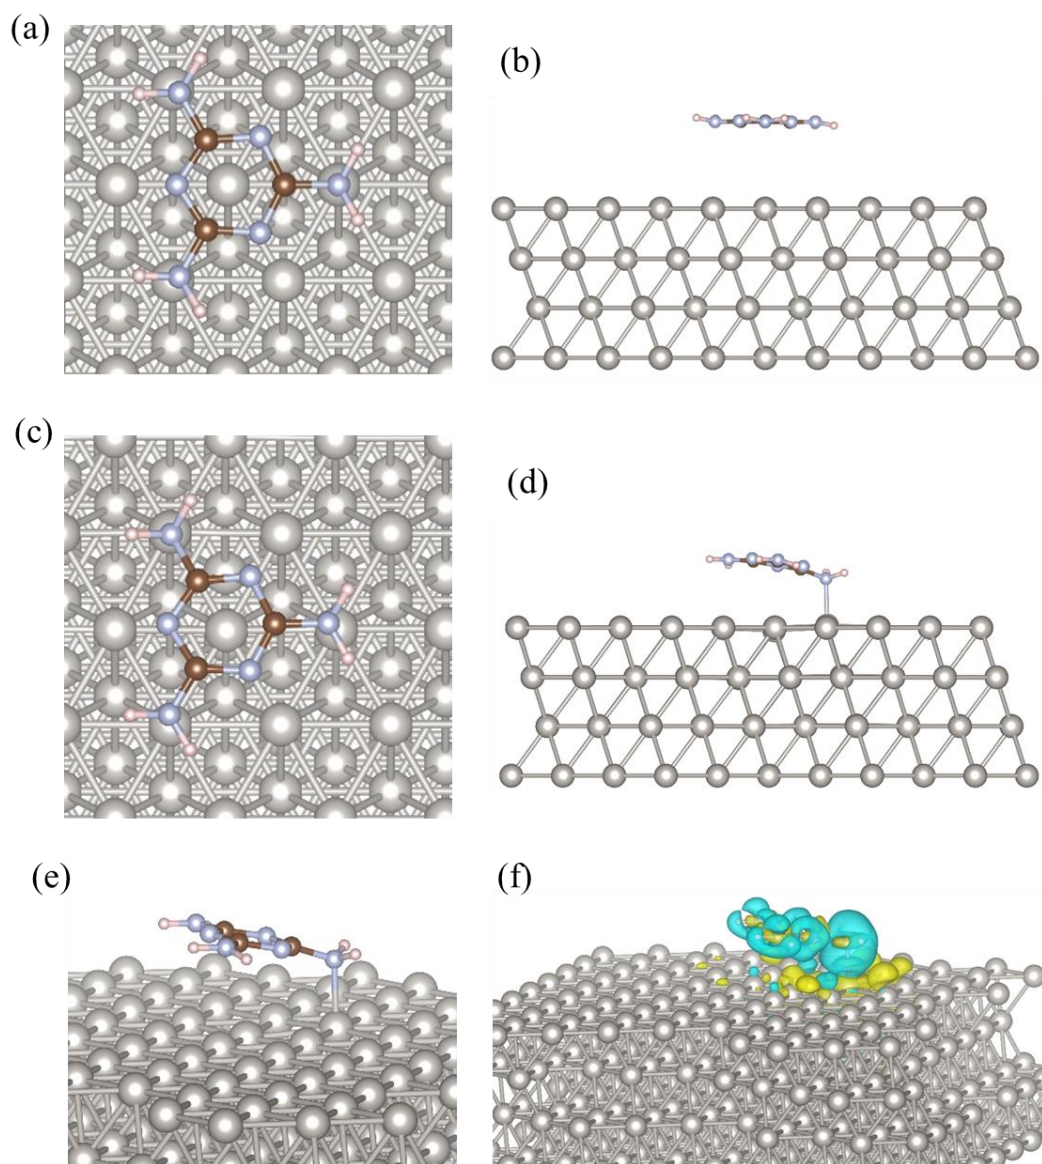

**Figure S46.** (a) Top and (b) side views of entry 24. (c) Top, (d) side, and (e) perspective views of the optimised structures of entry 24. (f) Charge difference distribution of the optimised structure with a threshold of  $0.001 e^-/\text{Bohr}^3$ . Yellow and blue represent decrease and increase of electron density, respectively. The grey, brown, blue, and white balls represent Pt, C, N, and H atoms, respectively.



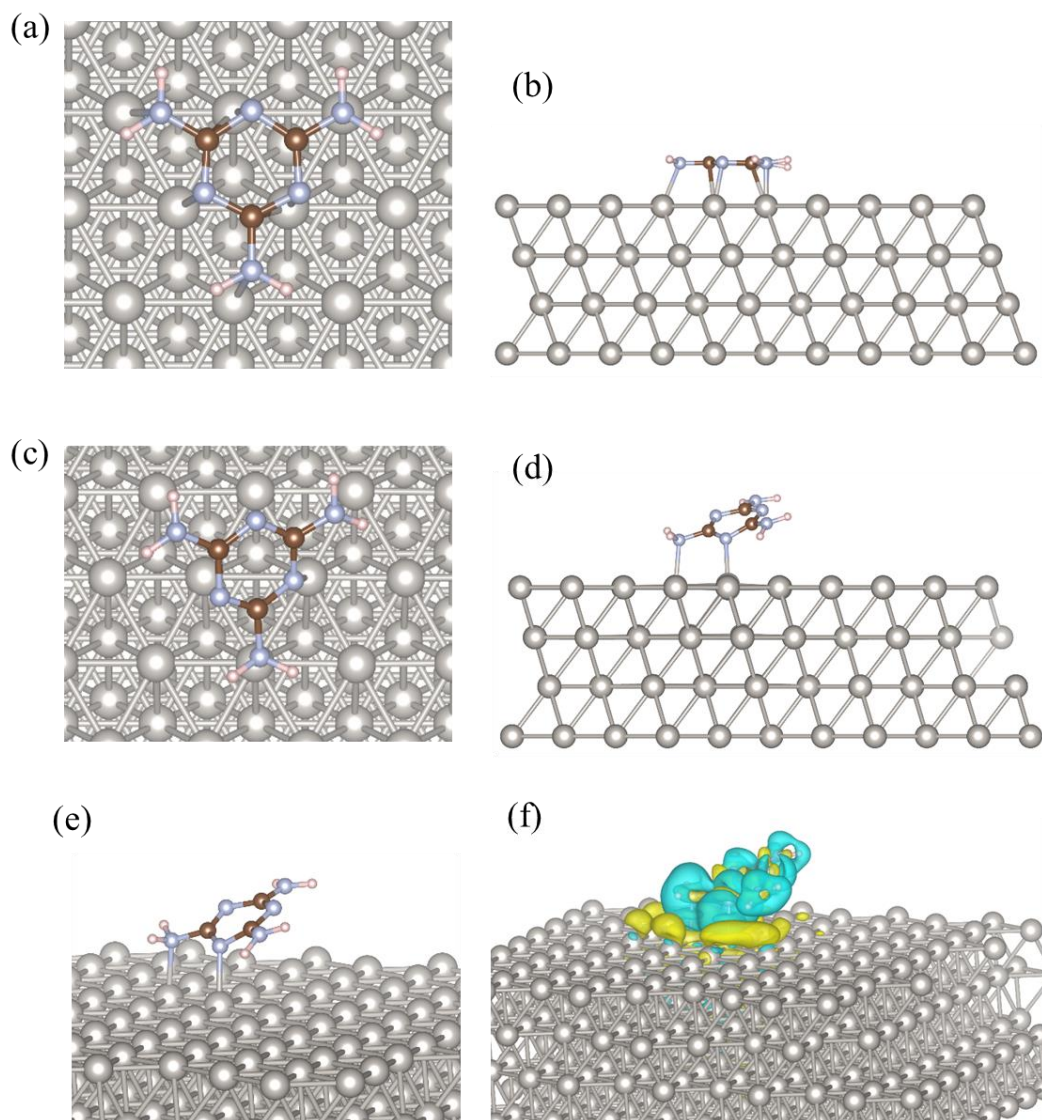

**Figure S47.** (a) Top and (b) side views of entry 25. (c) Top, (d) side, and (e) perspective views of the optimised structures of entry 25. (f) Charge difference distribution of the optimised structure with a threshold of  $0.001 e^-/\text{Bohr}^3$ . Yellow and blue represent decrease and increase of electron density, respectively. The grey, brown, blue, and white balls represent Pt, C, N, and H atoms, respectively.

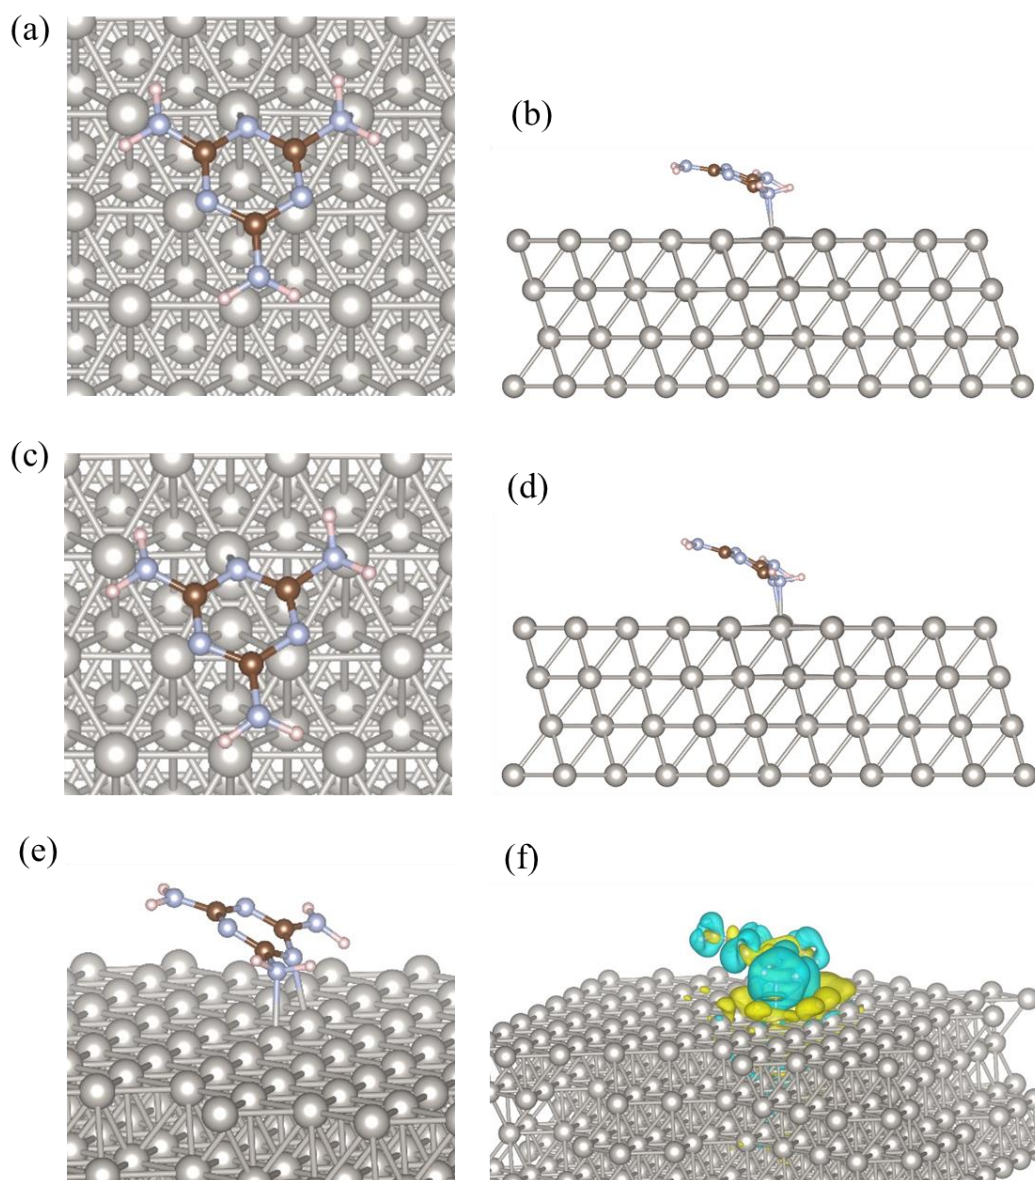

**Figure S48.** (a) Top and (b) side views of entry 26. (c) Top, (d) side, and (e) perspective views of the optimised structures of entry 26. (f) Charge difference distribution of the optimised structure with a threshold of  $0.001 e^-/\text{Bohr}^3$ . Yellow and blue represent decrease and increase of electron density, respectively. The grey, brown, blue, and white balls represent Pt, C, N, and H atoms, respectively.

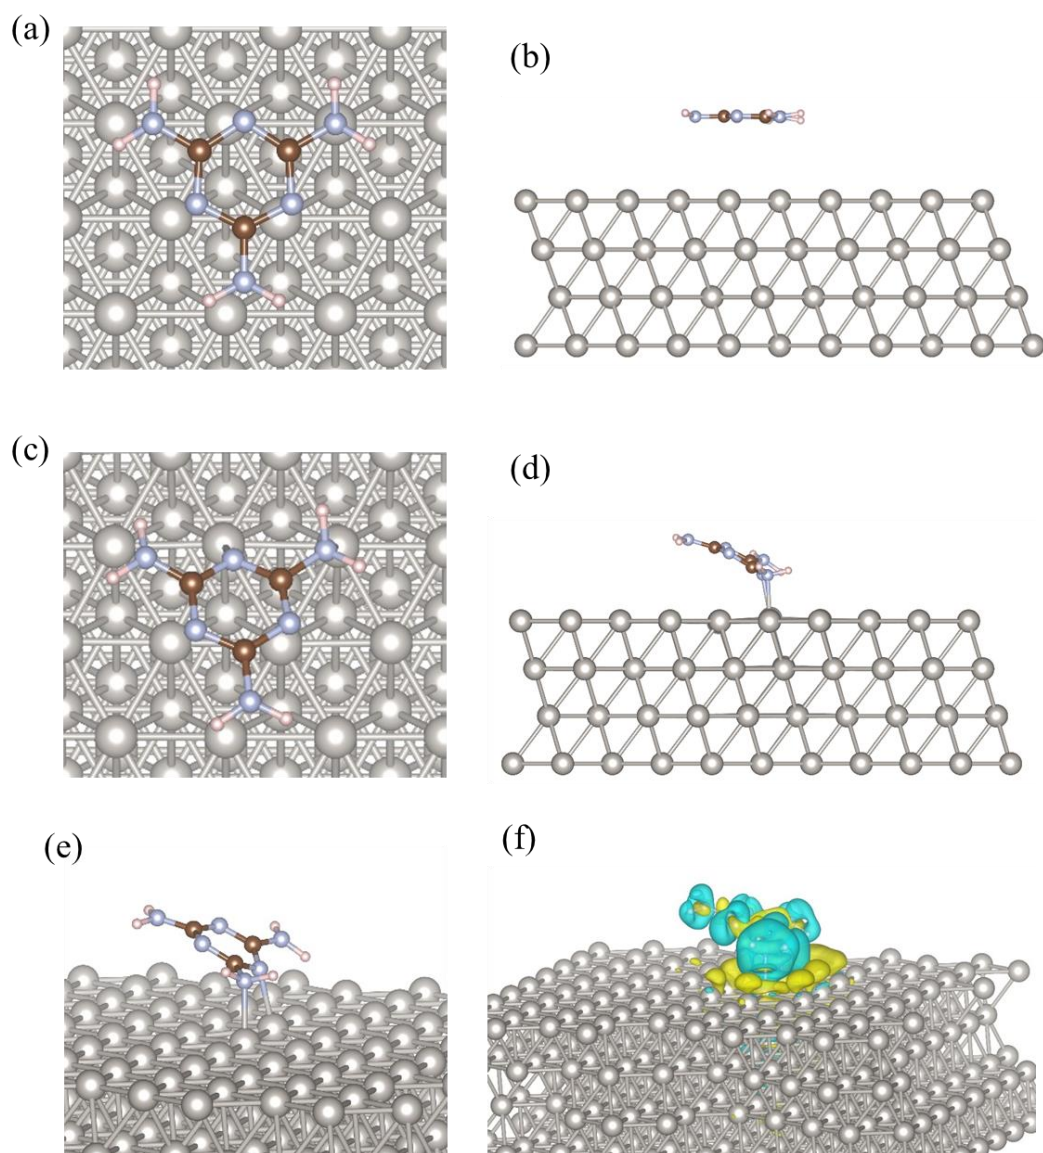

**Figure S49.** (a) Top and (b) side views of entry 27. (c) Top, (d) side, and (e) perspective views of the optimised structures of entry 27. (f) Charge difference distribution of the optimised structure with a threshold of  $0.001 e^-/\text{Bohr}^3$ . Yellow and blue represent decrease and increase of electron density, respectively. The grey, brown, blue, and white balls represent Pt, C, N, and H atoms, respectively.

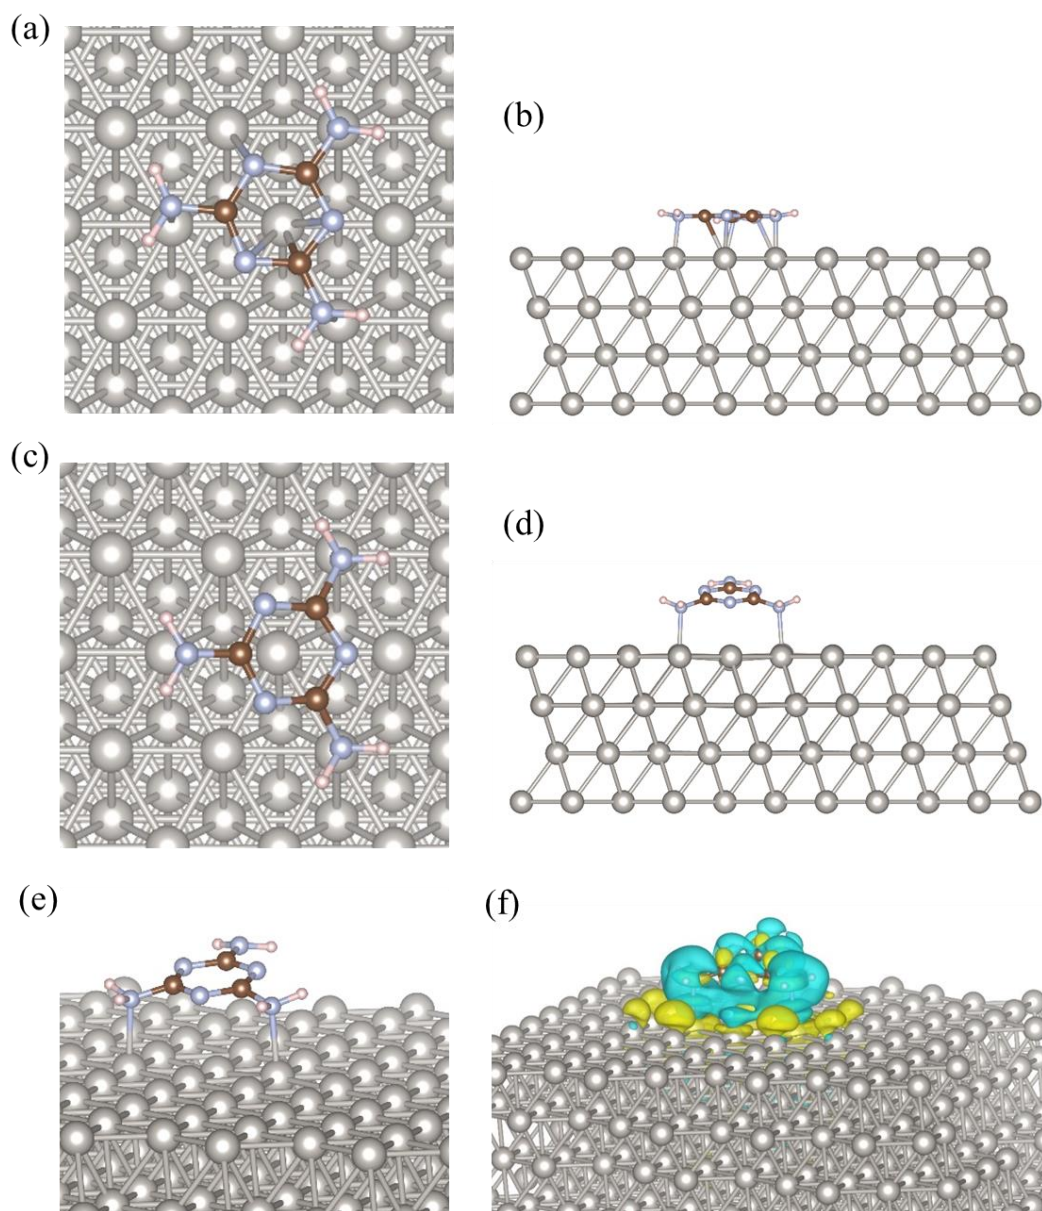

**Figure S50.** (a) Top and (b) side views of entry 28. (c) Top, (d) side, and (e) perspective views of the optimised structures of entry 28. (f) Charge difference distribution of the optimised structure with a threshold of  $0.001 e^-/\text{Bohr}^3$ . Yellow and blue represent decrease and increase of electron density, respectively. The grey, brown, blue, and white balls represent Pt, C, N, and H atoms, respectively.

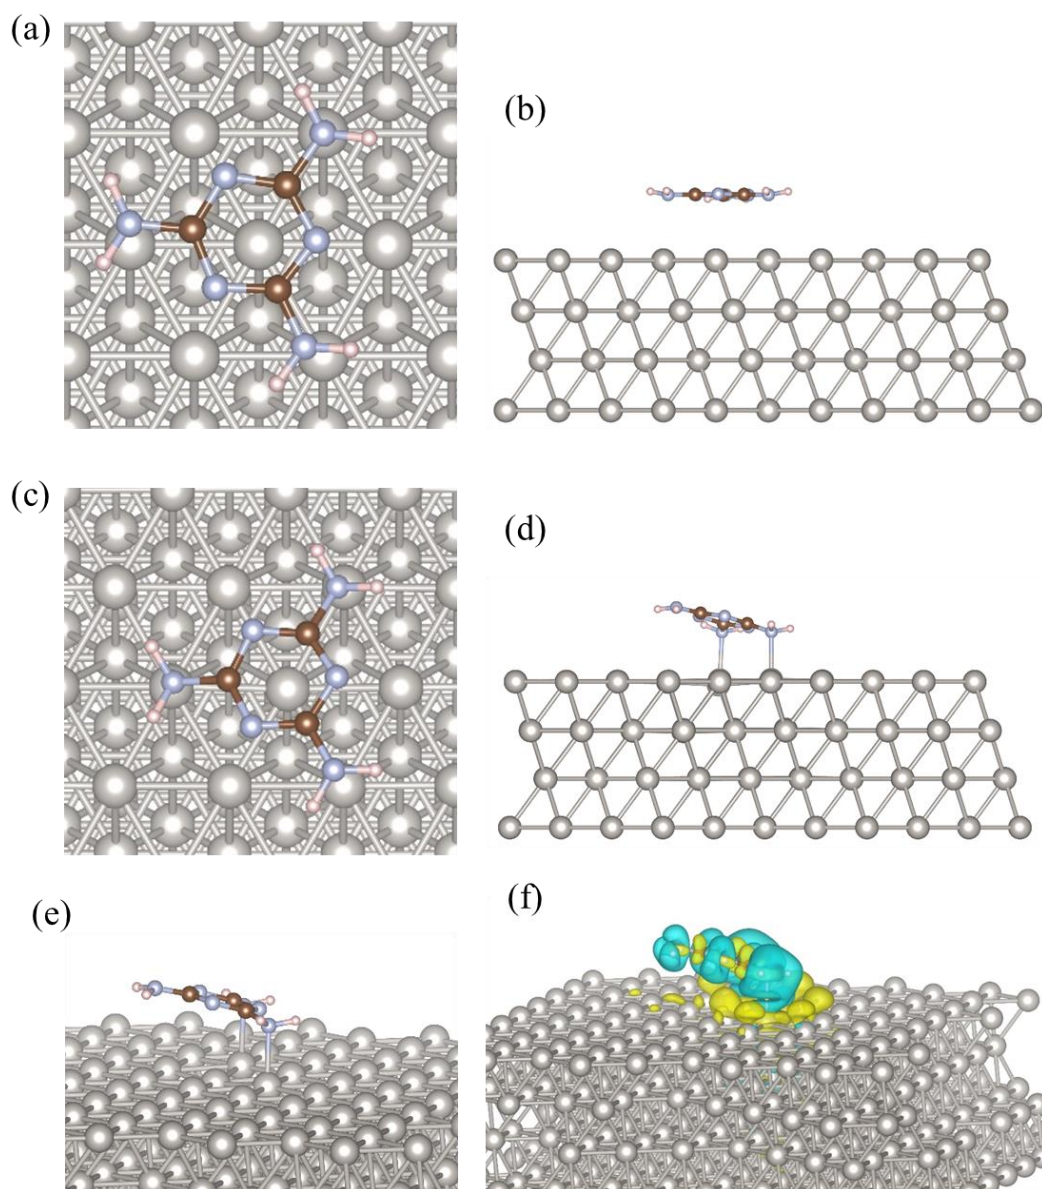

**Figure S51.** (a) Top and (b) side views of entry 29. (c) Top, (d) side, and (e) perspective views of the optimised structures of entry 29. (f) Charge difference distribution of the optimised structure with a threshold of  $0.001 e^-/\text{Bohr}^3$ . Yellow and blue represent decrease and increase of electron density, respectively. The grey, brown, blue, and white balls represent Pt, C, N, and H atoms, respectively.

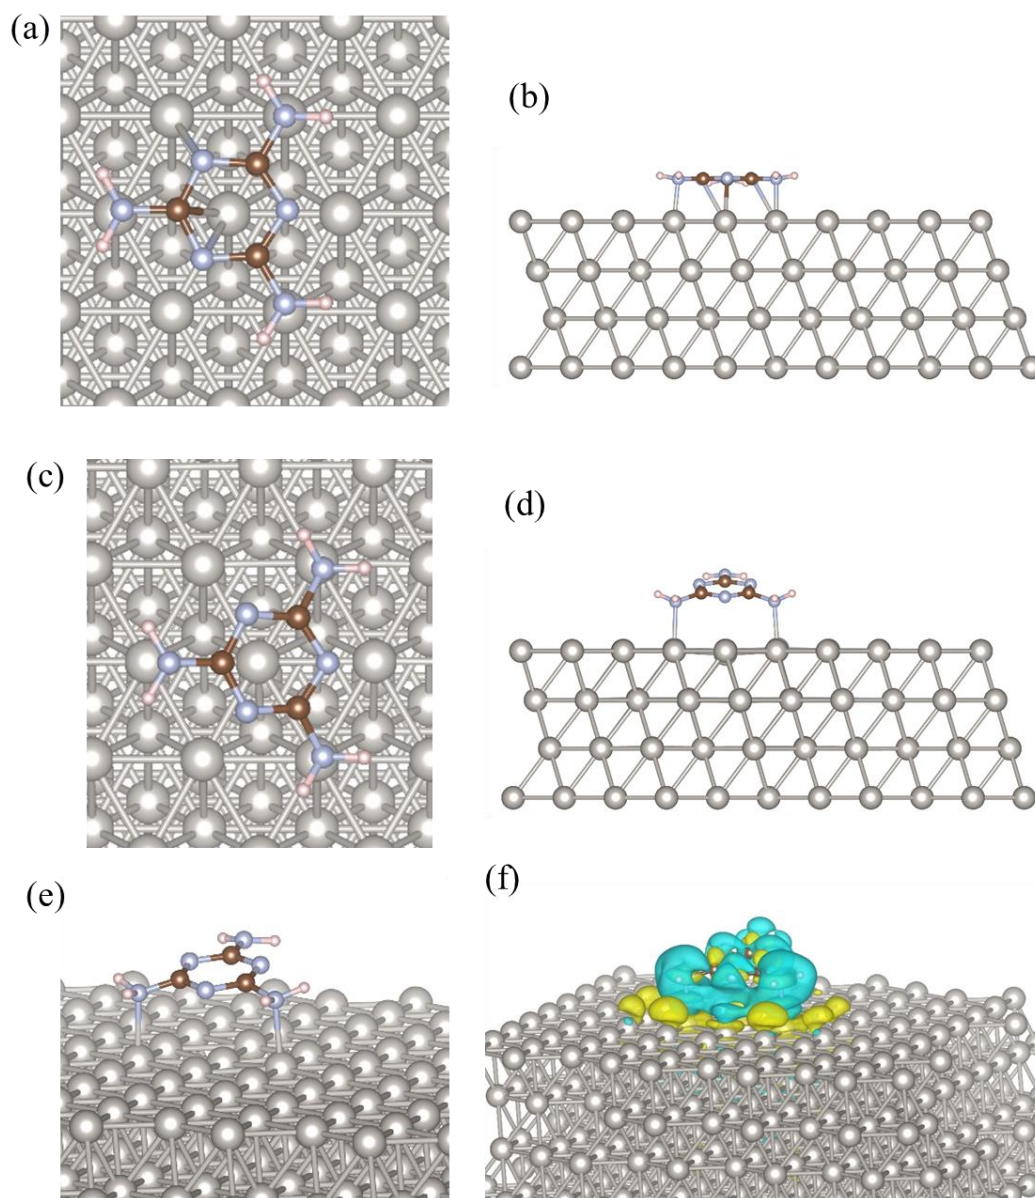

**Figure S52.** (a) Top and (b) side views of entry 30. (c) Top, (d) side, and (e) perspective views of the optimised structures of entry 30. (f) Charge difference distribution of the optimised structure with a threshold of  $0.001 e^-/\text{Bohr}^3$ . Yellow and blue represent decrease and increase of electron density, respectively. The grey, brown, blue, and white balls represent Pt, C, N, and H atoms, respectively.

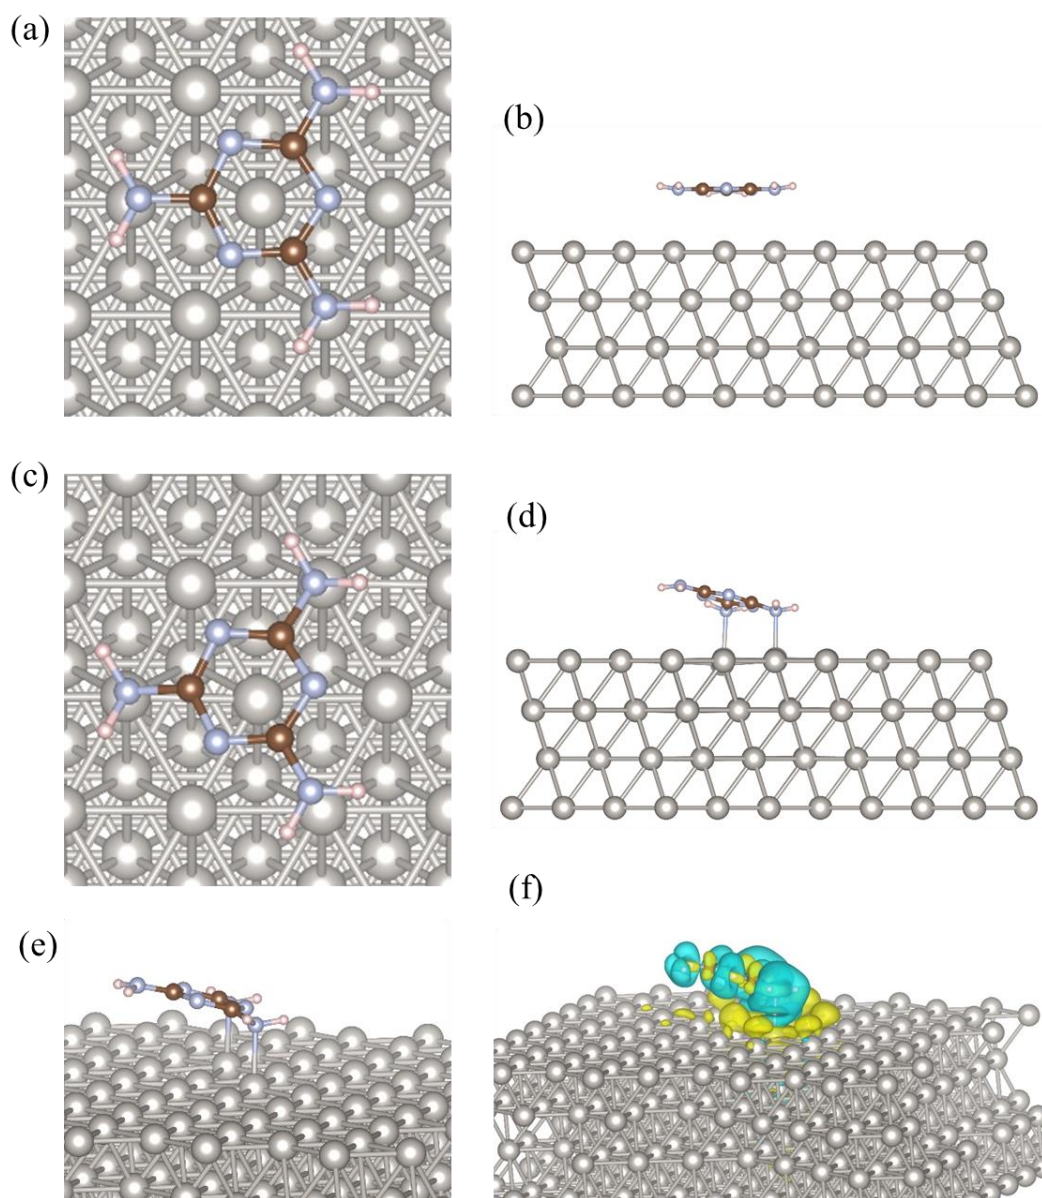

**Figure S53.** (a) Top and (b) side views of entry 31. (c) Top, (d) side, and (e) perspective views of the optimised structures of entry 31. (f) Charge difference distribution of the optimised structure with a threshold of  $0.001 e^-/\text{Bohr}^3$ . Yellow and blue represent decrease and increase of electron density, respectively. The grey, brown, blue, and white balls represent Pt, C, N, and H atoms, respectively.

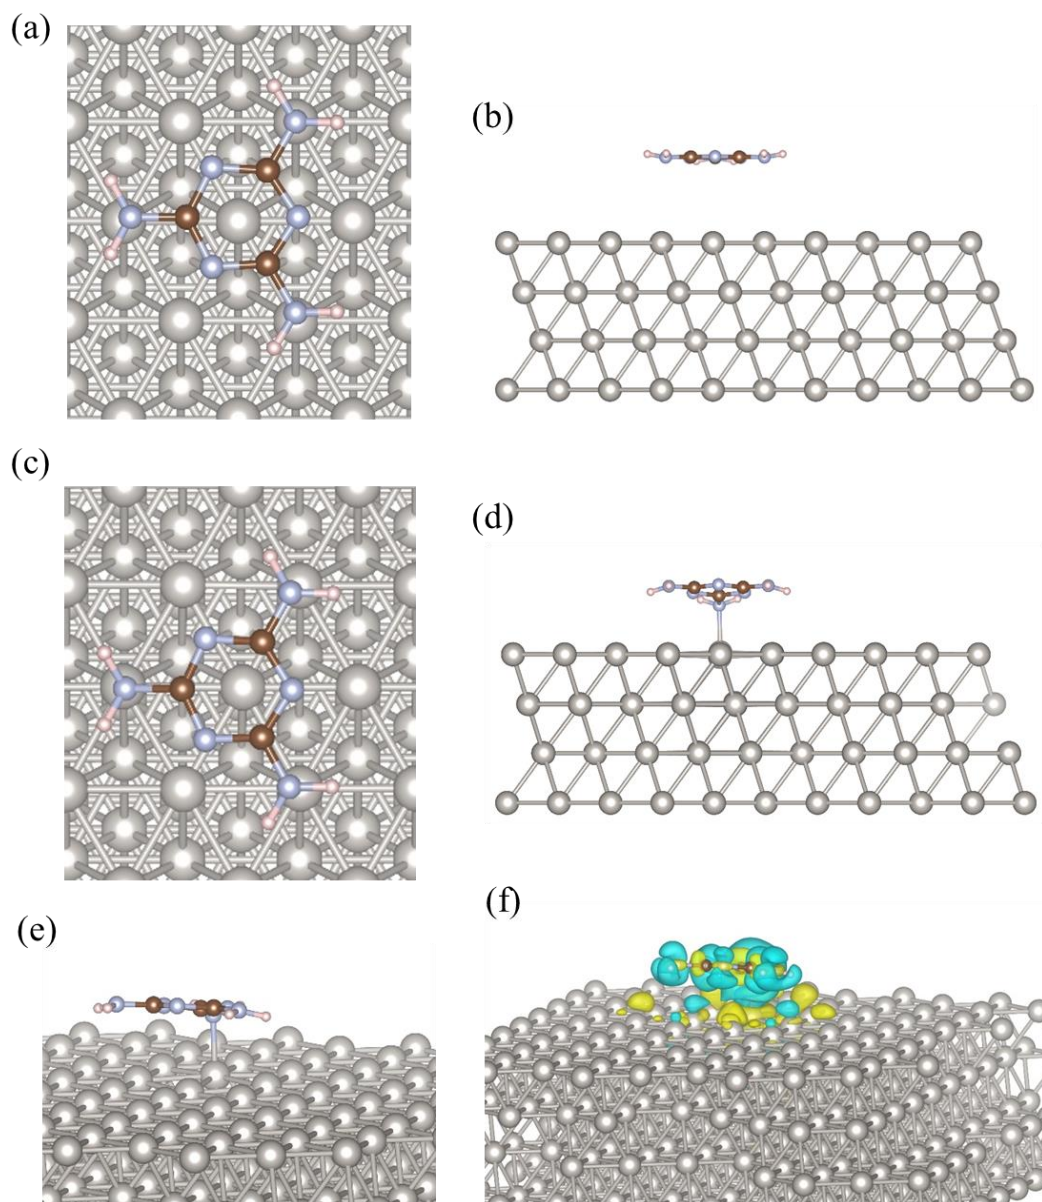

**Figure S54.** (a) Top and (b) side views of entry 32. (c) Top, (d) side, and (e) perspective views of the optimised structures of entry 32. (f) Charge difference distribution of the optimised structure with a threshold of  $0.001 e^-/\text{Bohr}^3$ . Yellow and blue represent decrease and increase of electron density, respectively. The grey, brown, blue, and white balls represent Pt, C, N, and H atoms, respectively.



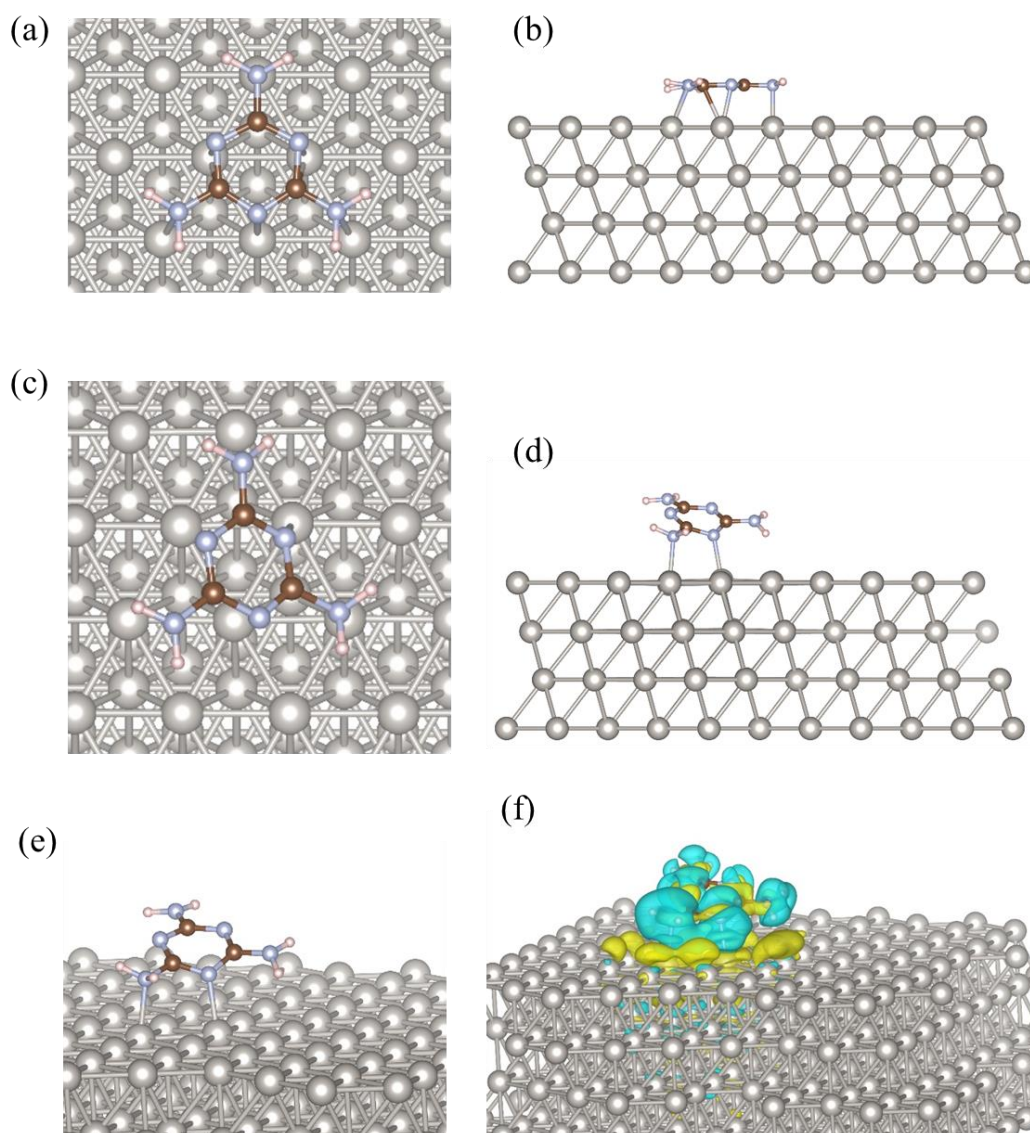

**Figure S55.** (a) Top and (b) side views of entry 33. (c) Top, (d) side, and (e) perspective views of the optimised structures of entry 33. (f) Charge difference distribution of the optimised structure with a threshold of  $0.001 e^-/\text{Bohr}^3$ . Yellow and blue represent decrease and increase of electron density, respectively. The grey, brown, blue, and white balls represent Pt, C, N, and H atoms, respectively.

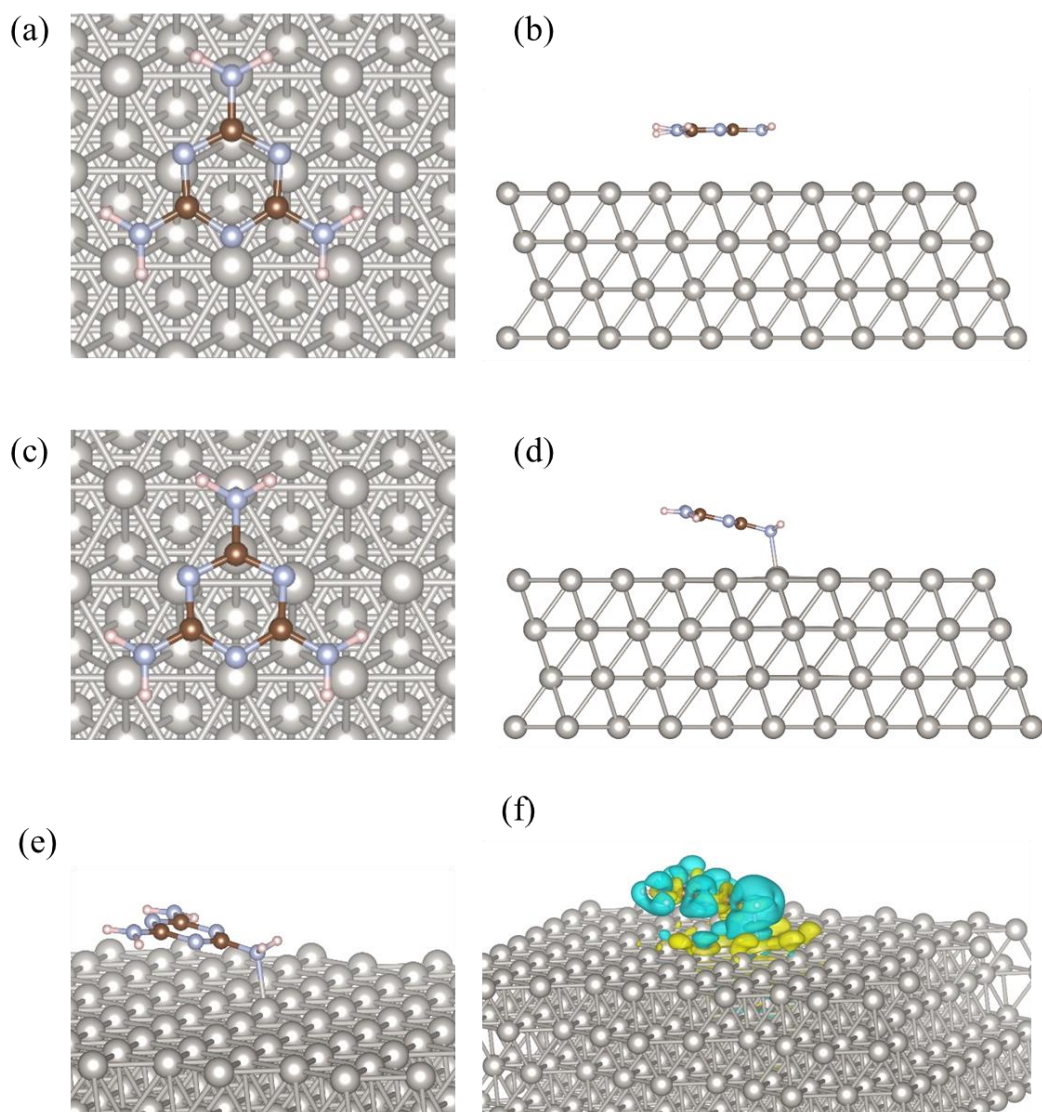

**Figure S56.** (a) Top and (b) side views of entry 34. (c) Top, (d) side, and (e) perspective views of the optimised structures of entry 34. (f) Charge difference distribution of the optimised structure with a threshold of  $0.001 e^-/\text{Bohr}^3$ . Yellow and blue represent decrease and increase of electron density, respectively. The grey, brown, blue, and white balls represent Pt, C, N, and H atoms, respectively.

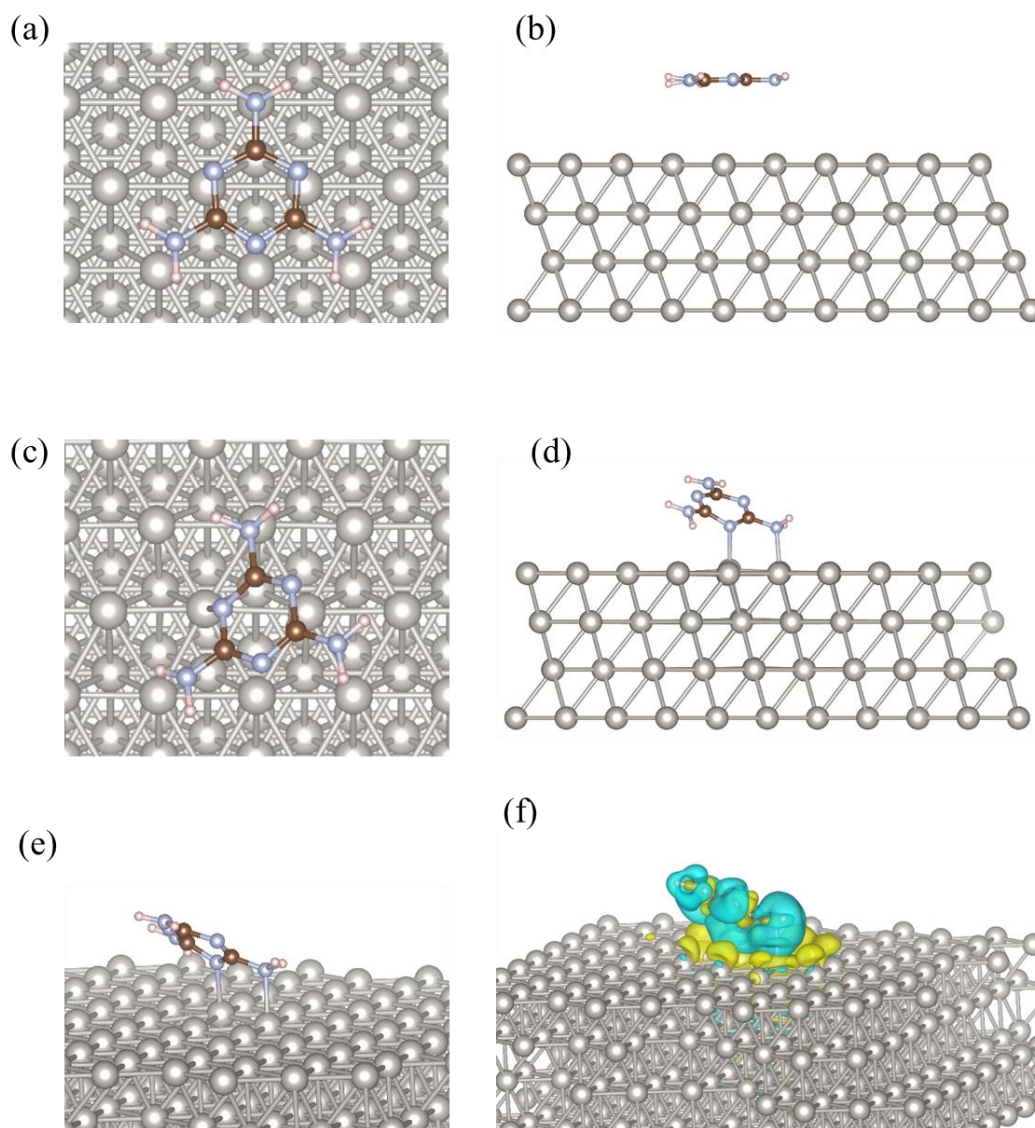

**Figure S57.** (a) Top and (b) side views of entry 35. (c) Top, (d) side, and (e) perspective views of the optimised structures of entry 35. (f) Charge difference distribution of the optimised structure with a threshold of  $0.001 e^-/\text{Bohr}^3$ . Yellow and blue represent decrease and increase of electron density, respectively. The grey, brown, blue, and white balls represent Pt, C, N, and H atoms, respectively.

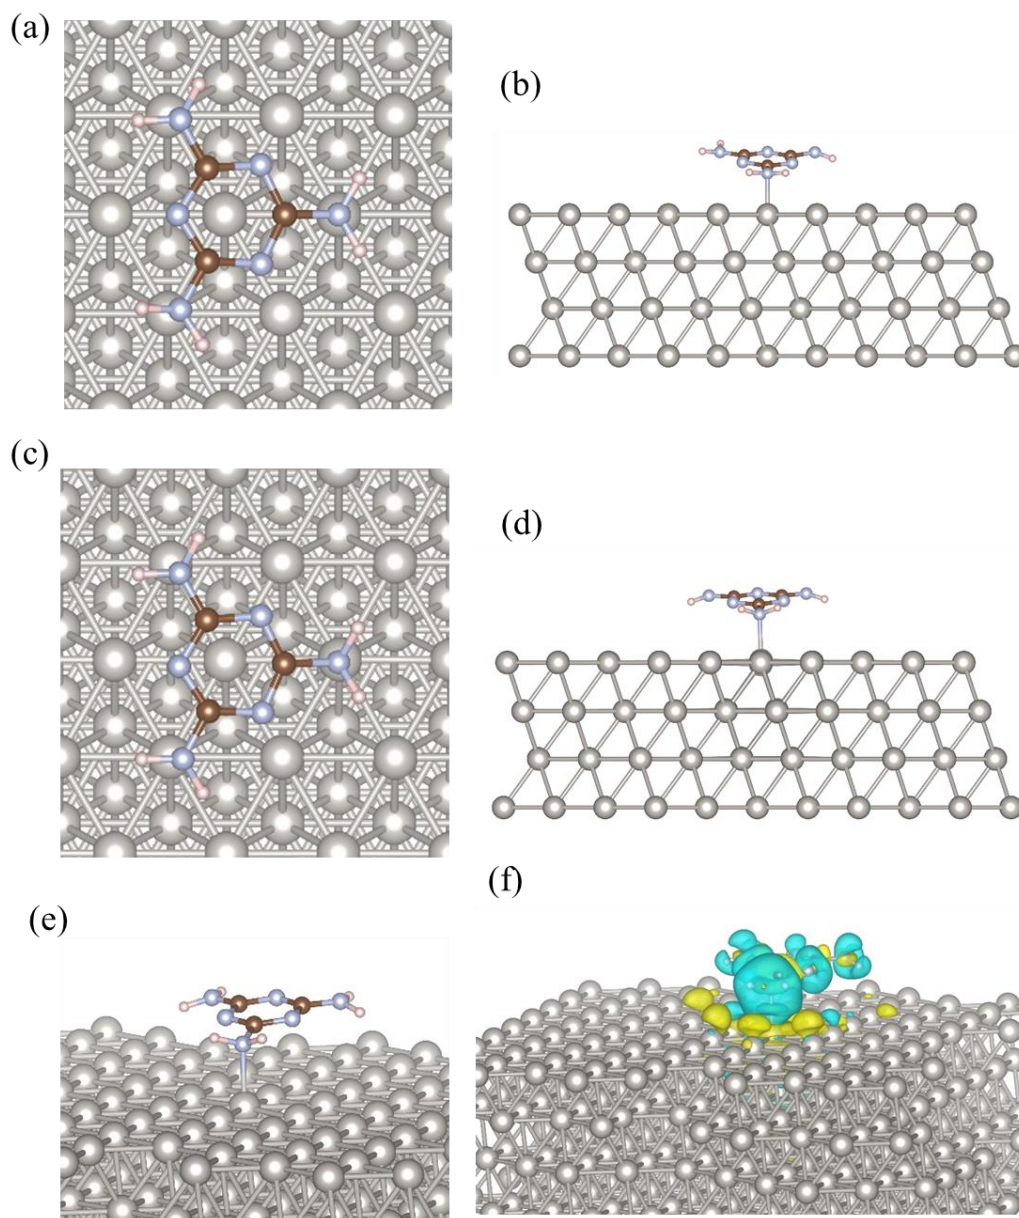

**Figure S58.** (a) Top and (b) side views of entry 36. (c) Top, (d) side, and (e) perspective views of the optimised structures of entry 36. (f) Charge difference distribution of the optimised structure with a threshold of  $0.001 e^-/\text{Bohr}^3$ . Yellow and blue represent decrease and increase of electron density, respectively. The grey, brown, blue, and white balls represent Pt, C, N, and H atoms, respectively.

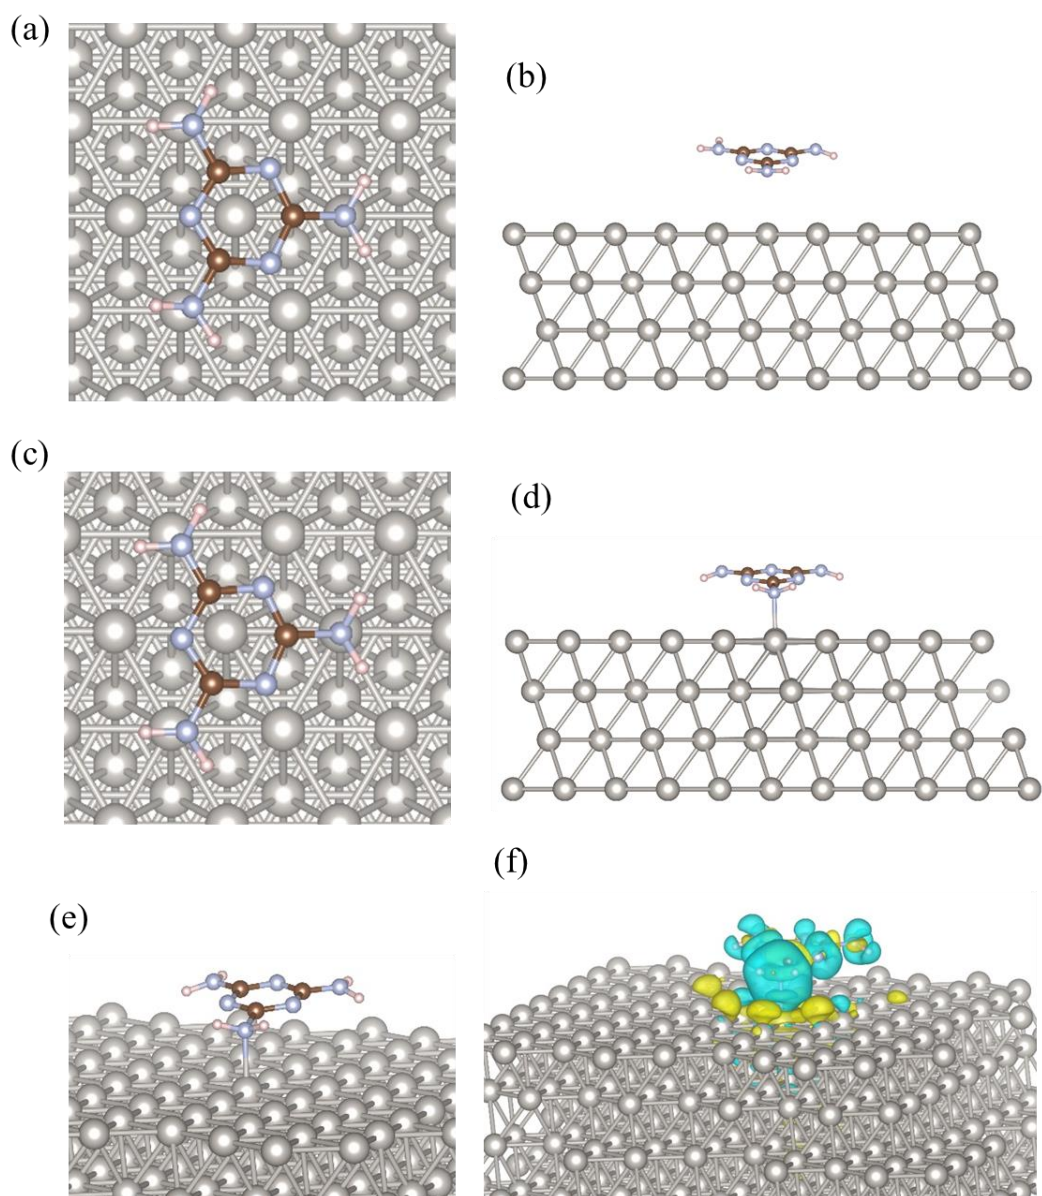

**Figure S59.** (a) Top and (b) side views of entry 37. (c) Top, (d) side, and (e) perspective views of the optimised structures of entry 37. (f) Charge difference distribution of the optimised structure with a threshold of  $0.001 e^-/\text{Bohr}^3$ . Yellow and blue represent decrease and increase of electron density, respectively. The grey, brown, blue, and white balls represent Pt, C, N, and H atoms, respectively.

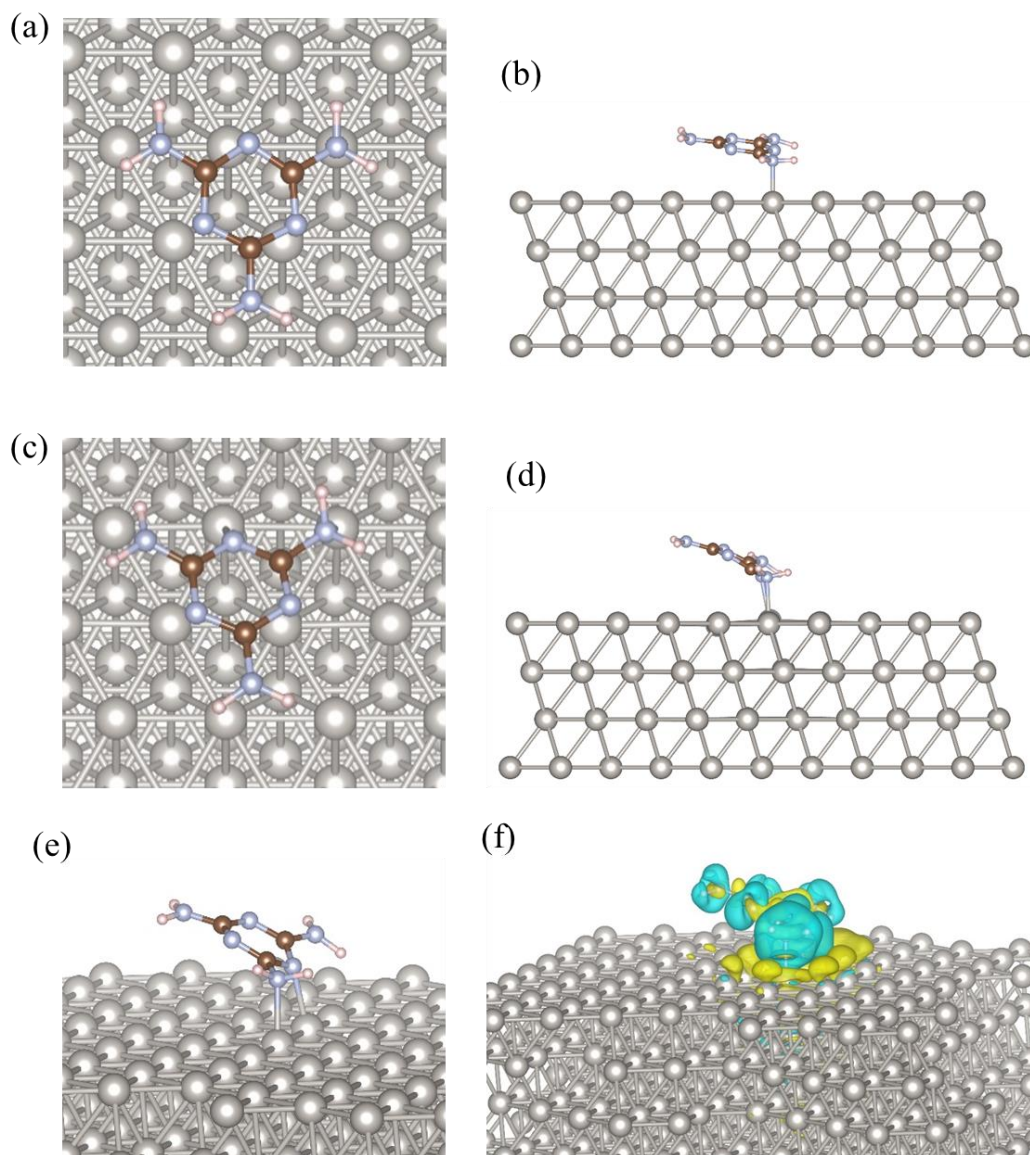

**Figure S60.** (a) Top and (b) side views of entry 38. (c) Top, (d) side, and (e) perspective views of the optimised structures of entry 38. (f) Charge difference distribution of the optimised structure with a threshold of  $0.001 e^-/\text{Bohr}^3$ . Yellow and blue represent decrease and increase of electron density, respectively. The grey, brown, blue, and white balls represent Pt, C, N, and H atoms, respectively.

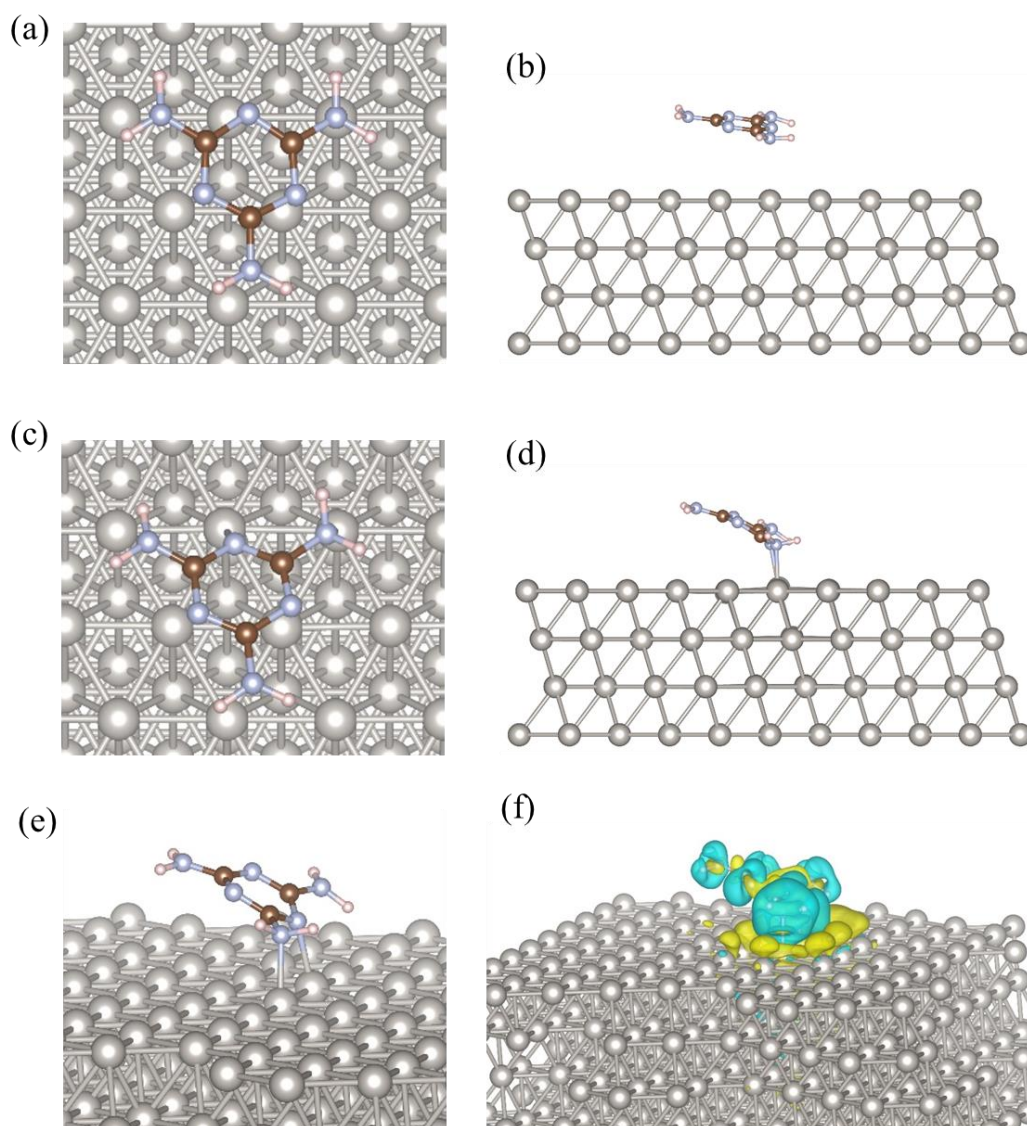

**Figure S61.** (a) Top and (b) side views of entry 39. (c) Top, (d) side, and (e) perspective views of the optimised structures of entry 39. (f) Charge difference distribution of the optimised structure with a threshold of  $0.001 e^-/\text{Bohr}^3$ . Yellow and blue represent decrease and increase of electron density, respectively. The grey, brown, blue, and white balls represent Pt, C, N, and H atoms, respectively.

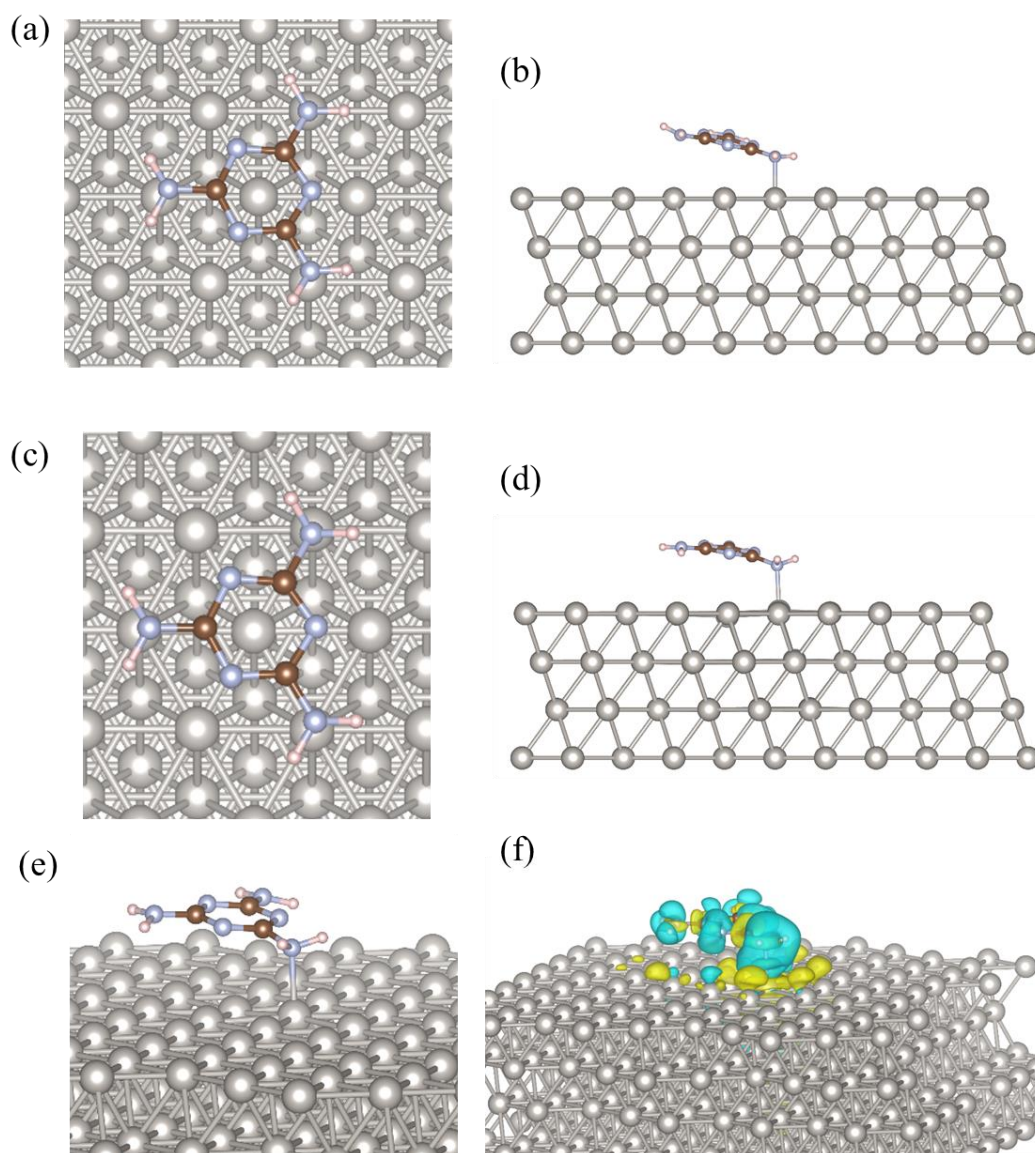

**Figure S62.** (a) Top and (b) side views of entry 40. (c) Top, (d) side, and (e) perspective views of the optimised structures of entry 40. (f) Charge difference distribution of the optimised structure with a threshold of  $0.001 e^-/\text{Bohr}^3$ . Yellow and blue represent decrease and increase of electron density, respectively. The grey, brown, blue, and white balls represent Pt, C, N, and H atoms, respectively.



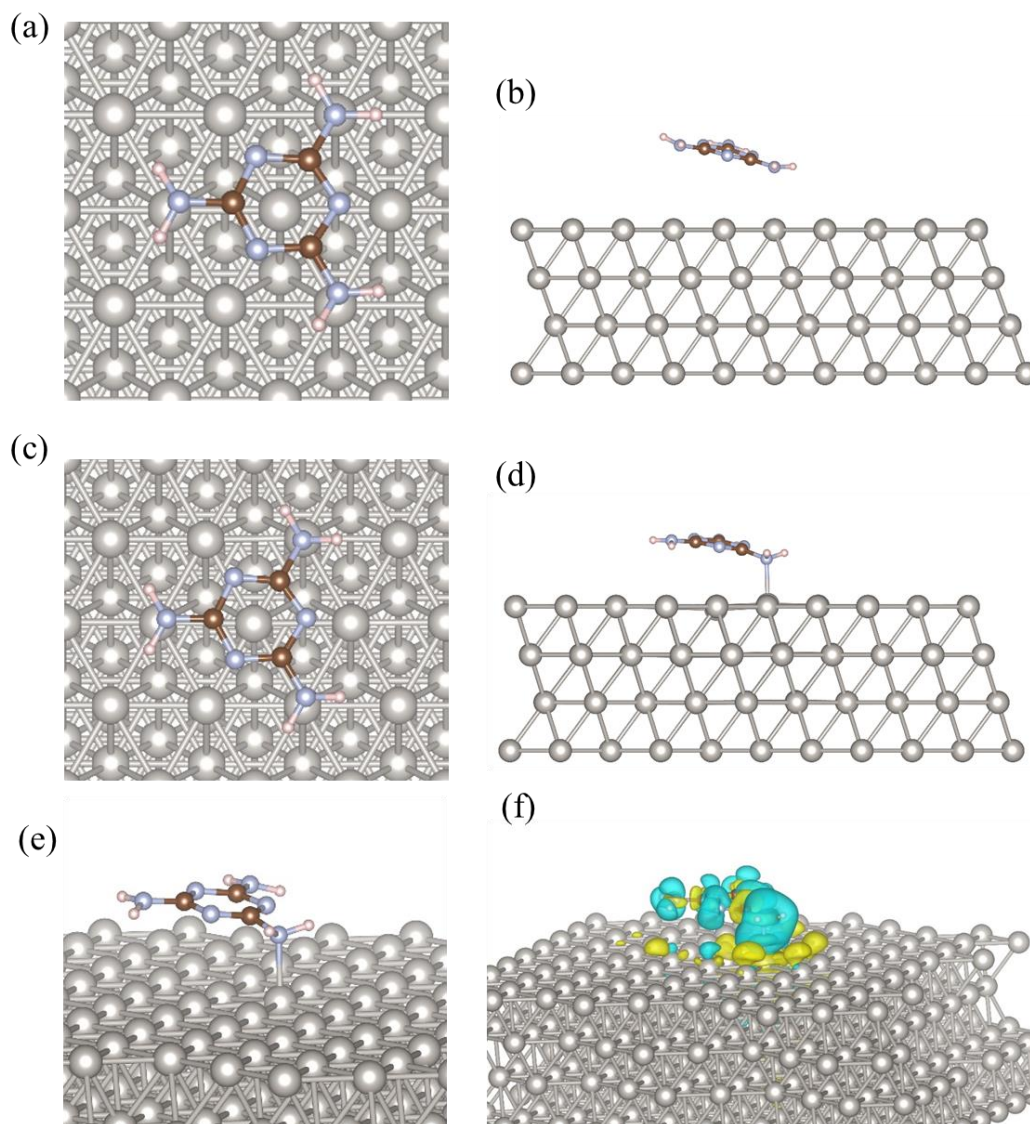

**Figure S63.** (a) Top and (b) side views of entry 41. (c) Top, (d) side, and (e) perspective views of the optimised structures of entry 41. (f) Charge difference distribution of the optimised structure with a threshold of  $0.001 e^-/\text{Bohr}^3$ . Yellow and blue represent decrease and increase of electron density, respectively. The grey, brown, blue, and white balls represent Pt, C, N, and H atoms, respectively.

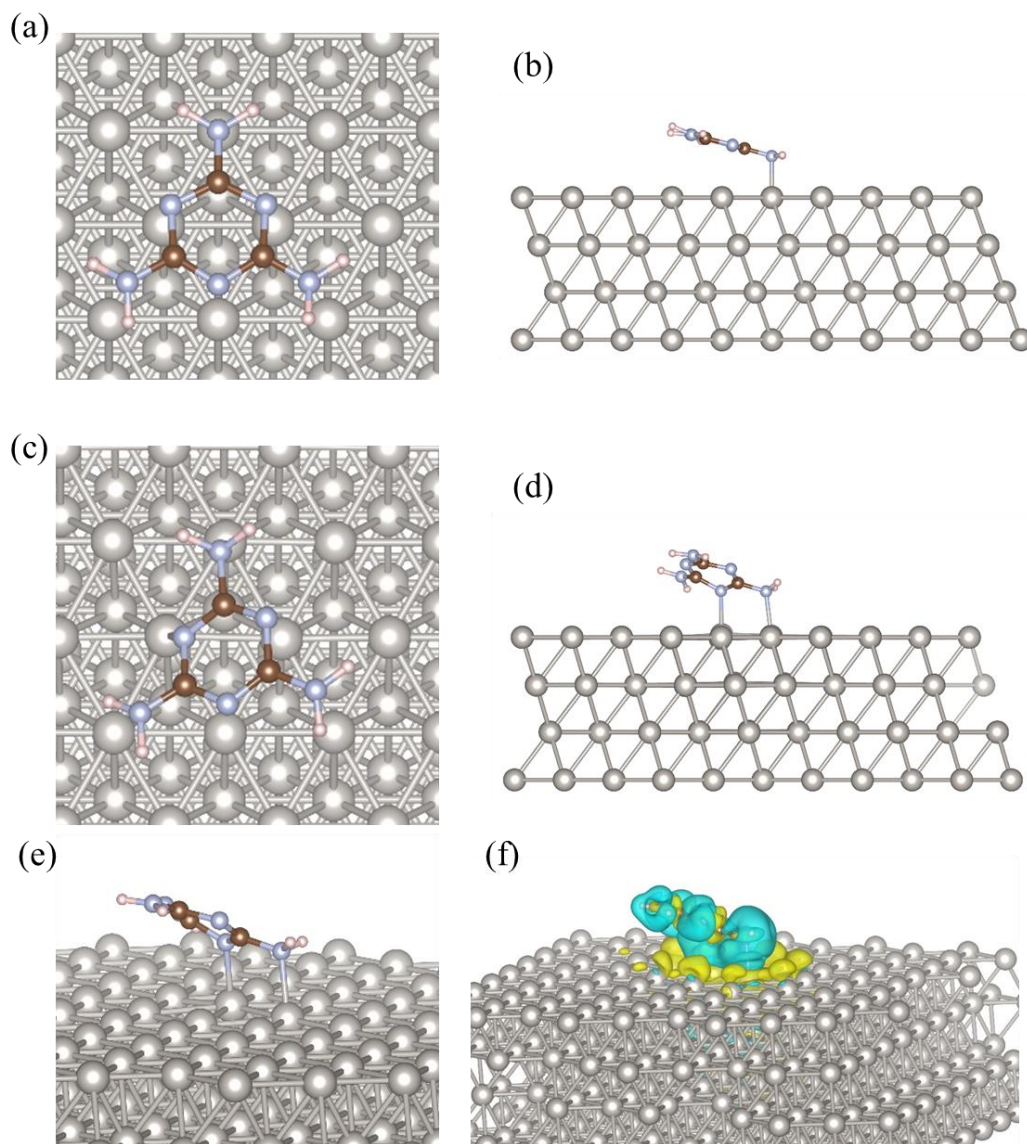

**Figure S64.** (a) Top and (b) side views of entry 42. (c) Top, (d) side, and (e) perspective views of the optimised structures of entry 42. (f) Charge difference distribution of the optimised structure with a threshold of  $0.001 e^-/\text{Bohr}^3$ . Yellow and blue represent decrease and increase of electron density, respectively. The grey, brown, blue, and white balls represent Pt, C, N, and H atoms, respectively.

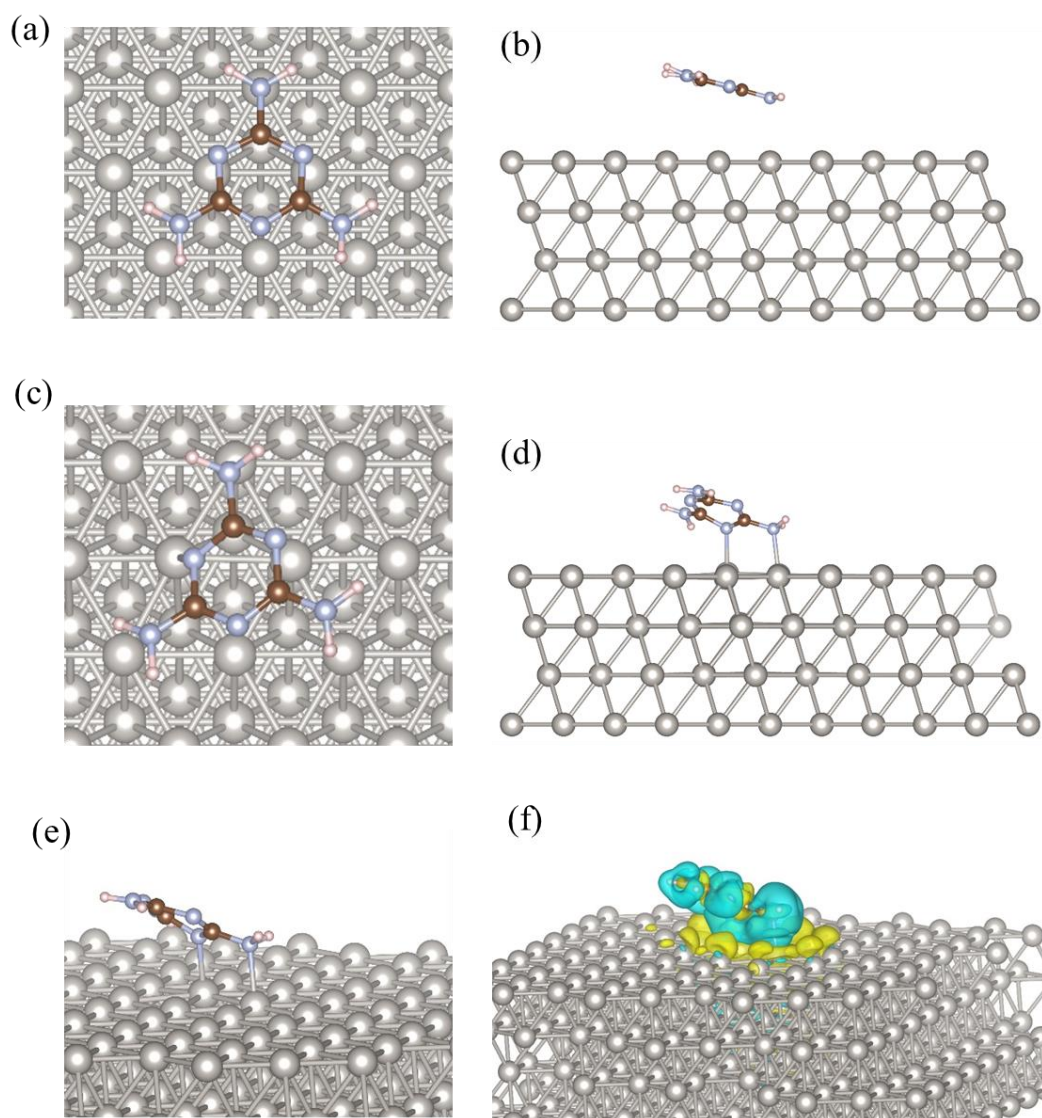

**Figure S65.** (a) Top and (b) side views of entry 43. (c) Top, (d) side, and (e) perspective views of the optimised structures of entry 43. (f) Charge difference distribution of the optimised structure with a threshold of  $0.001 e^-/\text{Bohr}^3$ . Yellow and blue represent decrease and increase of electron density, respectively. The grey, brown, blue, and white balls represent Pt, C, N, and H atoms, respectively.

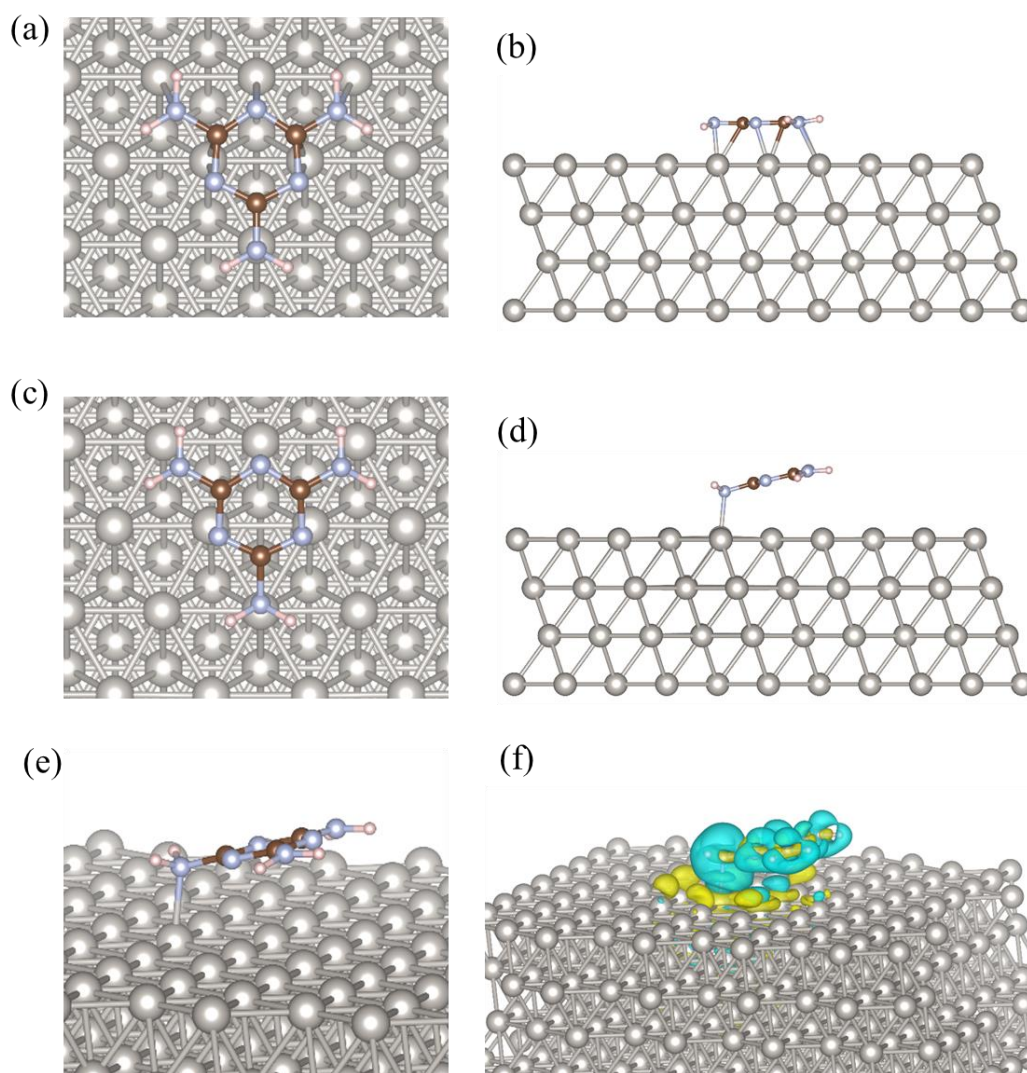

**Figure S66.** (a) Top and (b) side views of entry 44. (c) Top, (d) side, and (e) perspective views of the optimised structures of entry 44. (f) Charge difference distribution of the optimised structure with a threshold of  $0.001 e^-/\text{Bohr}^3$ . Yellow and blue represent decrease and increase of electron density, respectively. The grey, brown, blue, and white balls represent Pt, C, N, and H atoms, respectively.

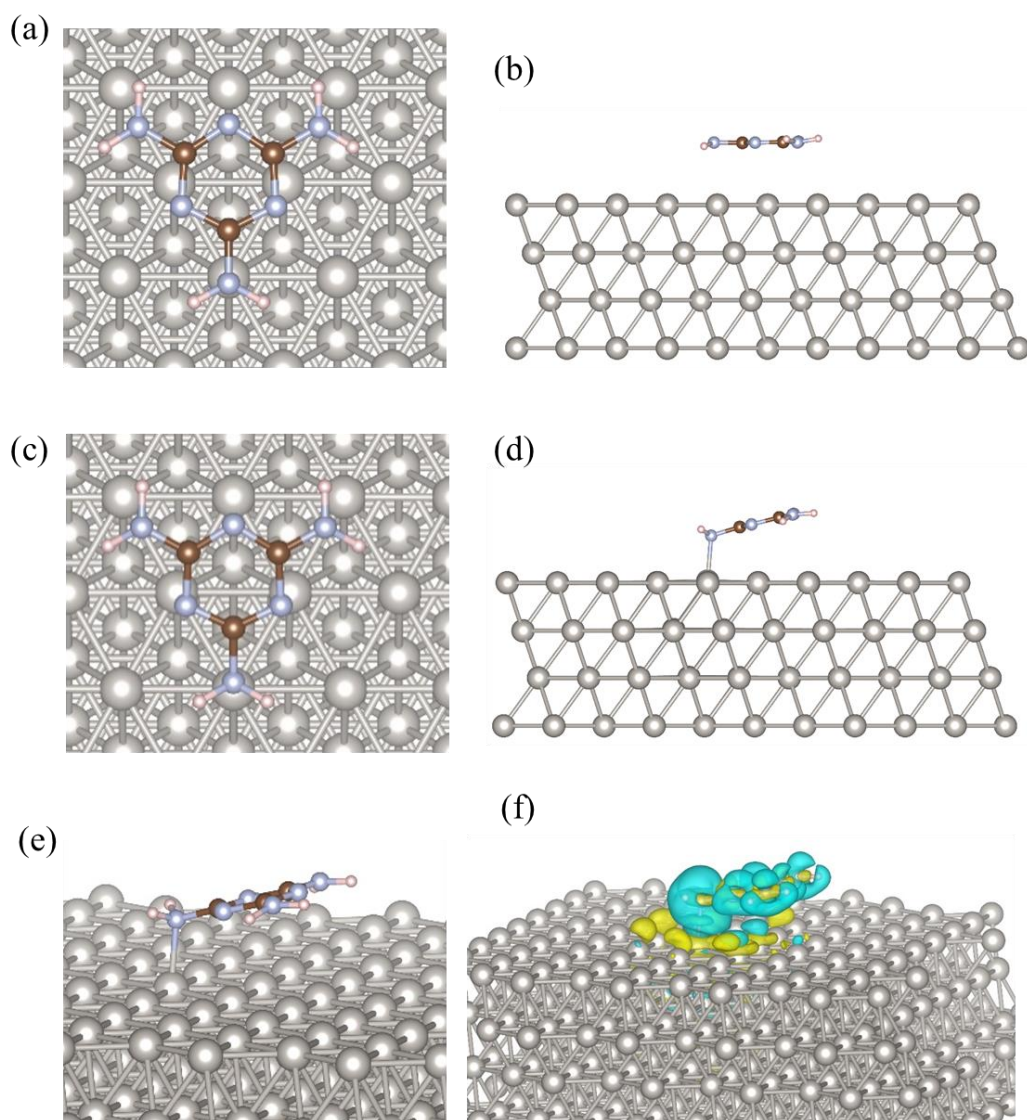

**Figure S67.** (a) Top and (b) side views of entry 45. (c) Top, (d) side, and (e) perspective views of the optimised structures of entry 45. (f) Charge difference distribution of the optimised structure with a threshold of  $0.001 \text{ e}^-/\text{Bohr}^3$ . Yellow and blue represent decrease and increase of electron density, respectively. The grey, brown, blue, and white balls represent Pt, C, N, and H atoms, respectively.

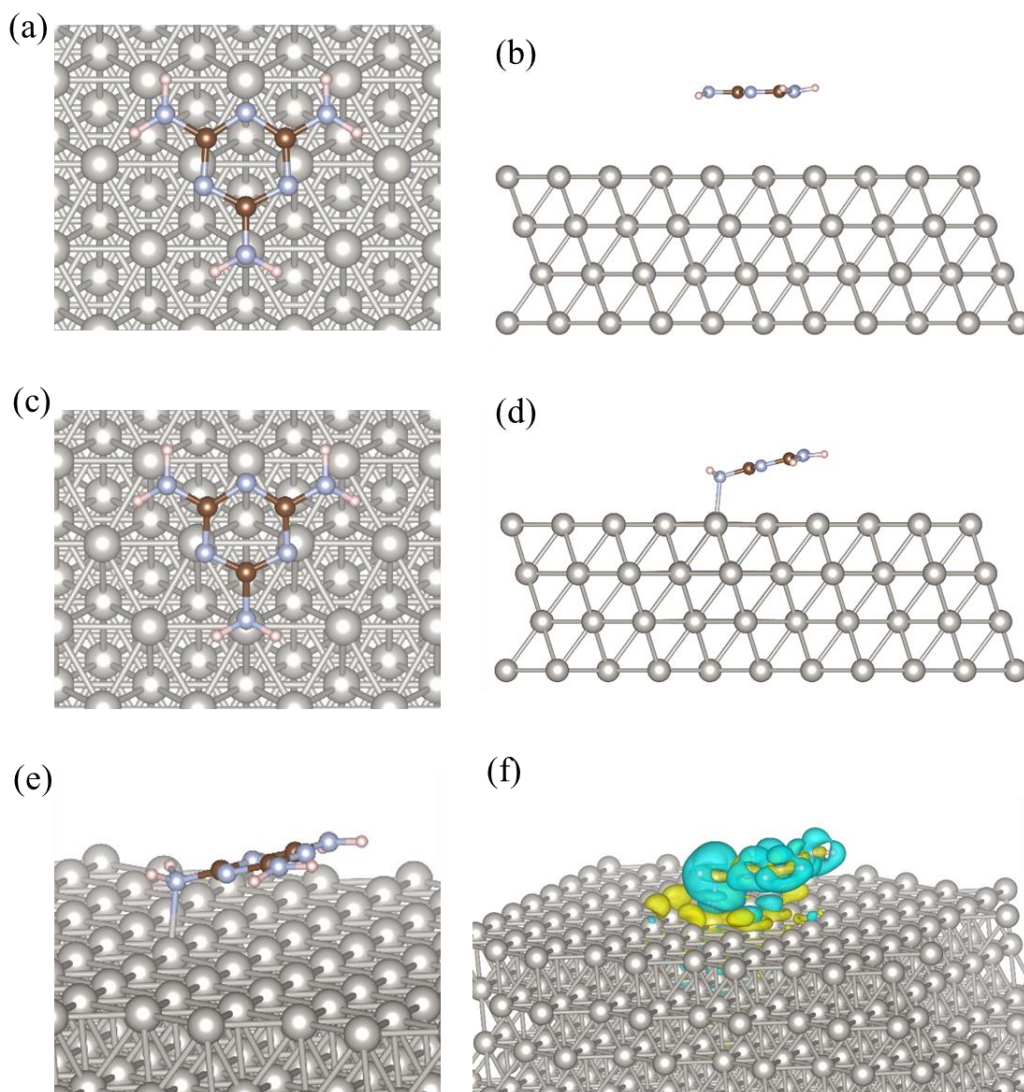

**Figure S68.** (a) Top and (b) side views of entry 46. (c) Top, (d) side, and (e) perspective views of the optimised structures of entry 46. (f) Charge difference distribution of the optimised structure with a threshold of  $0.001 e^-/\text{Bohr}^3$ . Yellow and blue represent decrease and increase of electron density, respectively. The grey, brown, blue, and white balls represent Pt, C, N, and H atoms, respectively.

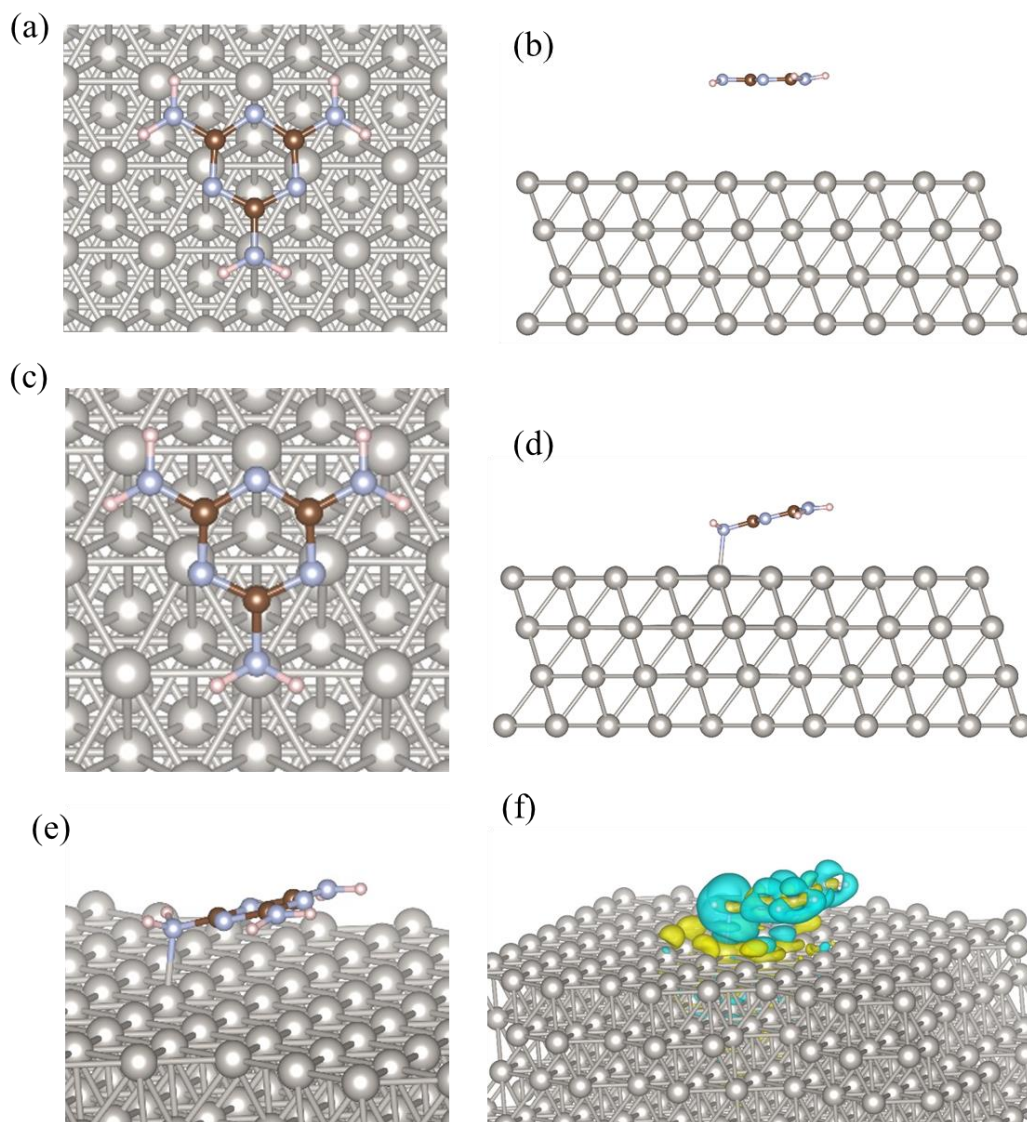

**Figure S69.** (a) Top and (b) side views of entry 47. (c) Top, (d) side, and (e) perspective views of the optimised structures of entry 47. (f) Charge difference distribution of the optimised structure with a threshold of  $0.001 e^-/\text{Bohr}^3$ . Yellow and blue represent decrease and increase of electron density, respectively. The grey, brown, blue, and white balls represent Pt, C, N, and H atoms, respectively.

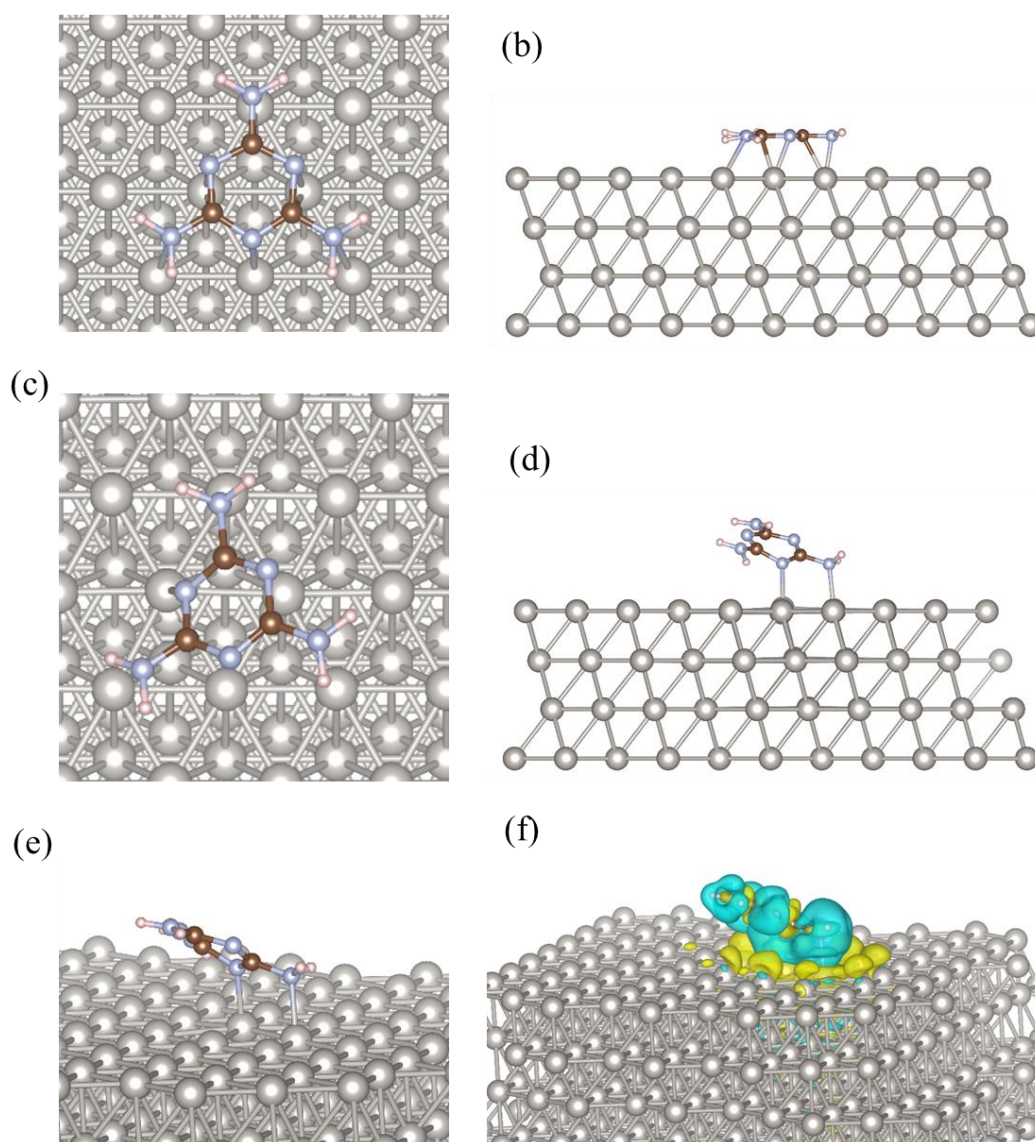

**Figure S70.** (a) Top and (b) side views of entry 48. (c) Top, (d) side, and (e) perspective views of the optimised structures of entry 48. (f) Charge difference distribution of the optimised structure with a threshold of  $0.001 e^-/\text{Bohr}^3$ . Yellow and blue represent decrease and increase of electron density, respectively. The grey, brown, blue, and white balls represent Pt, C, N, and H atoms, respectively.



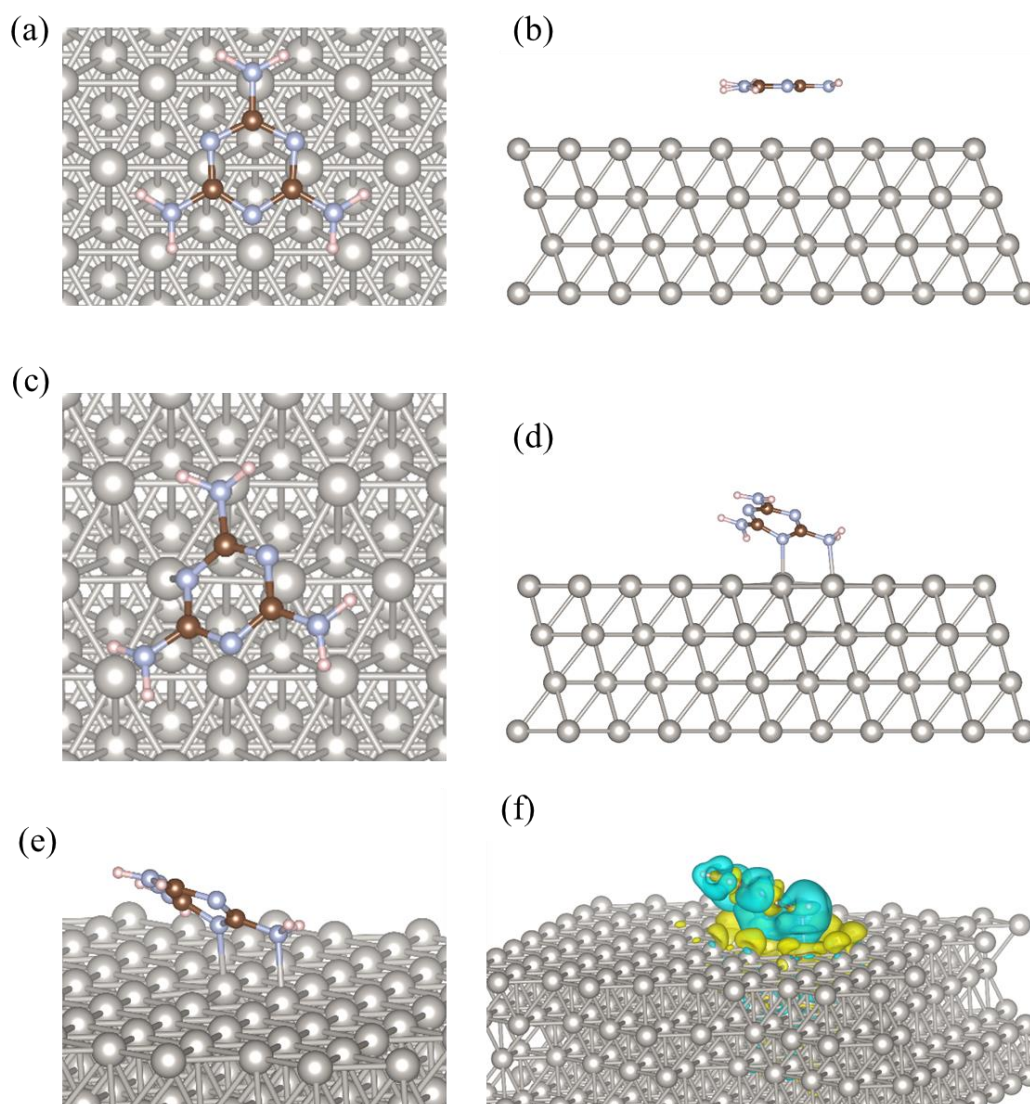

**Figure S71.** (a) Top and (b) side views of entry 49. (c) Top, (d) side, and (e) perspective views of the optimised structures of entry 49. (f) Charge difference distribution of the optimised structure with a threshold of  $0.001 e^-/\text{Bohr}^3$ . Yellow and blue represent decrease and increase of electron density, respectively. The grey, brown, blue, and white balls represent Pt, C, N, and H atoms, respectively.

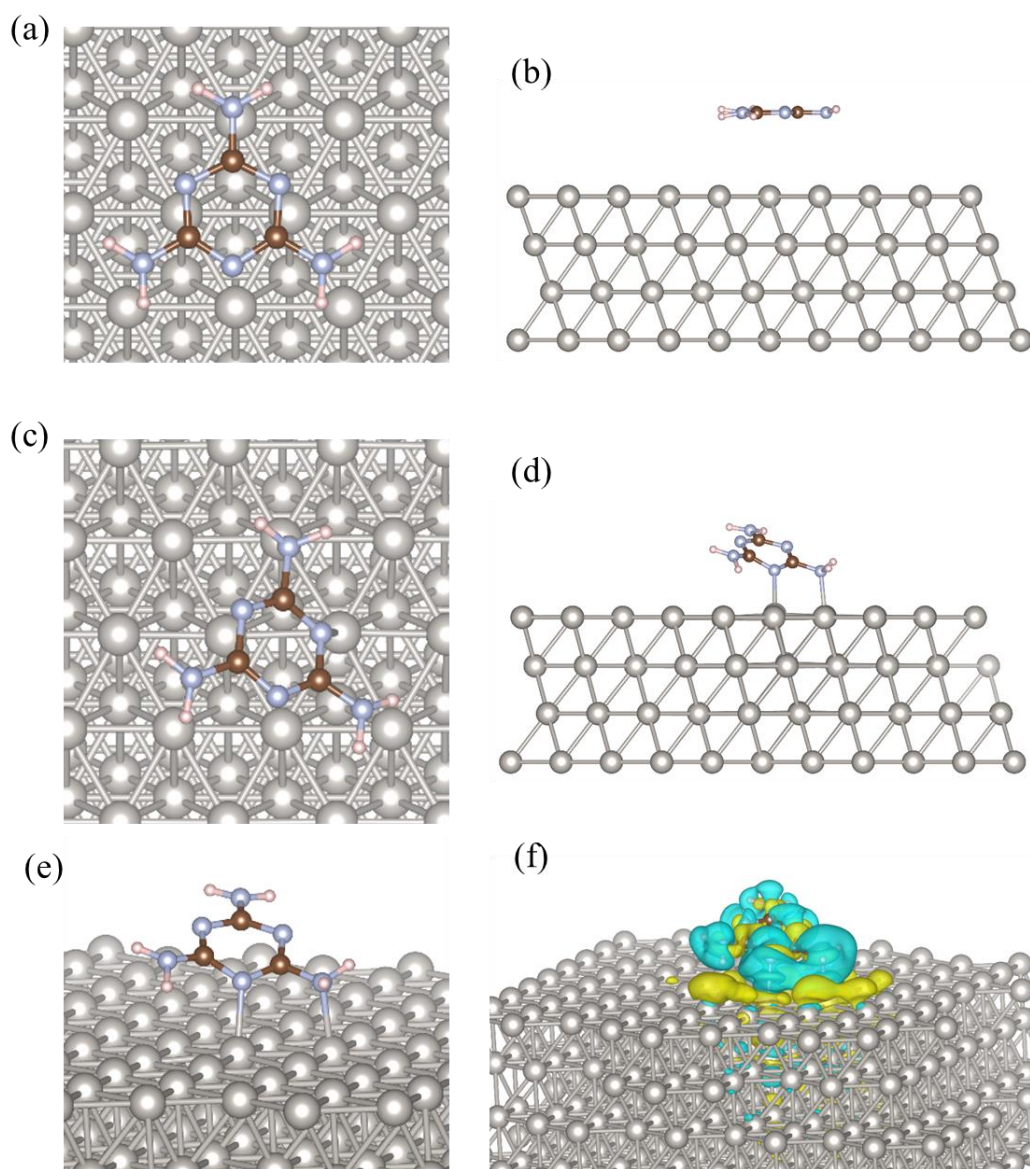

**Figure S72.** (a) Top and (b) side views of entry 50. (c) Top, (d) side, and (e) perspective views of the optimised structures of entry 50. (f) Charge difference distribution of the optimised structure with a threshold of  $0.001 e^-/\text{Bohr}^3$ . Yellow and blue represent decrease and increase of electron density, respectively. The grey, brown, blue, and white balls represent Pt, C, N, and H atoms, respectively.

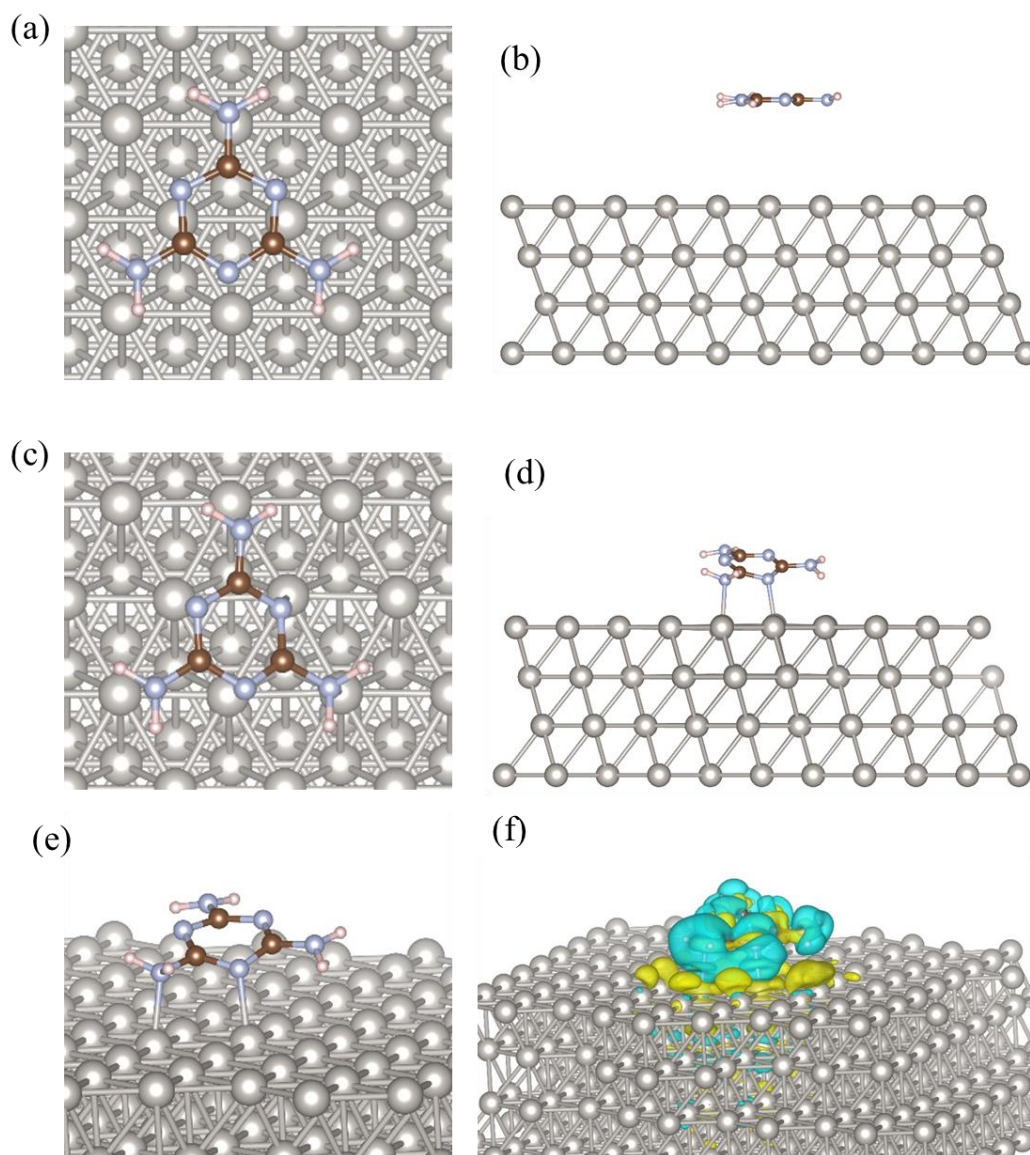

**Figure S73.** (a) Top and (b) side views of entry 51. (c) Top, (d) side, and (e) perspective views of the optimised structures of entry 51. (f) Charge difference distribution of the optimised structure with a threshold of  $0.001 e^-/\text{Bohr}^3$ . Yellow and blue represent decrease and increase of electron density, respectively. The grey, brown, blue, and white balls represent Pt, C, N, and H atoms, respectively.

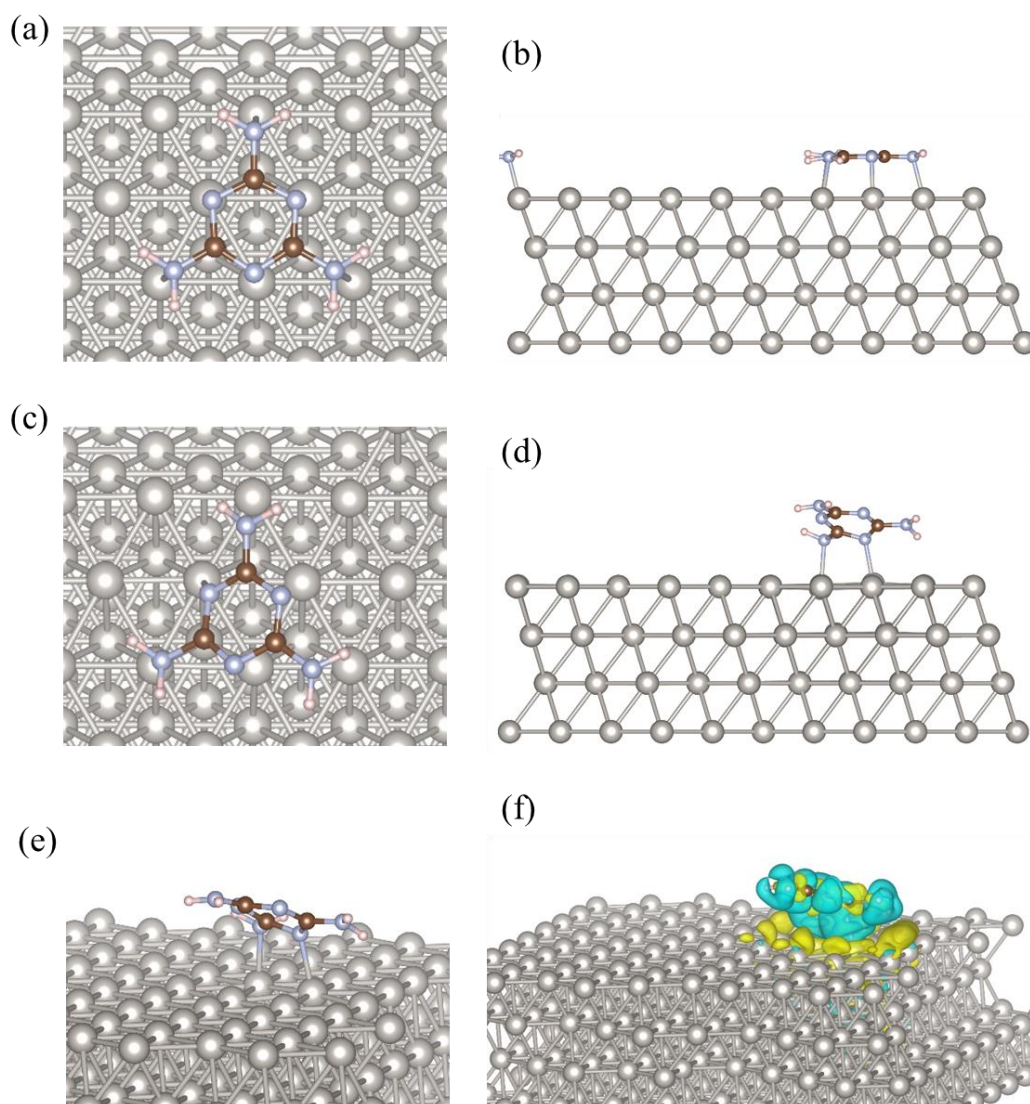

**Figure S74.** (a) Top and (b) side views of entry 52. (c) Top, (d) side, and (e) perspective views of the optimised structures of entry 52. (f) Charge difference distribution of the optimised structure with a threshold of  $0.001 e^-/\text{Bohr}^3$ . Yellow and blue represent decrease and increase of electron density, respectively. The grey, brown, blue, and white balls represent Pt, C, N, and H atoms, respectively.

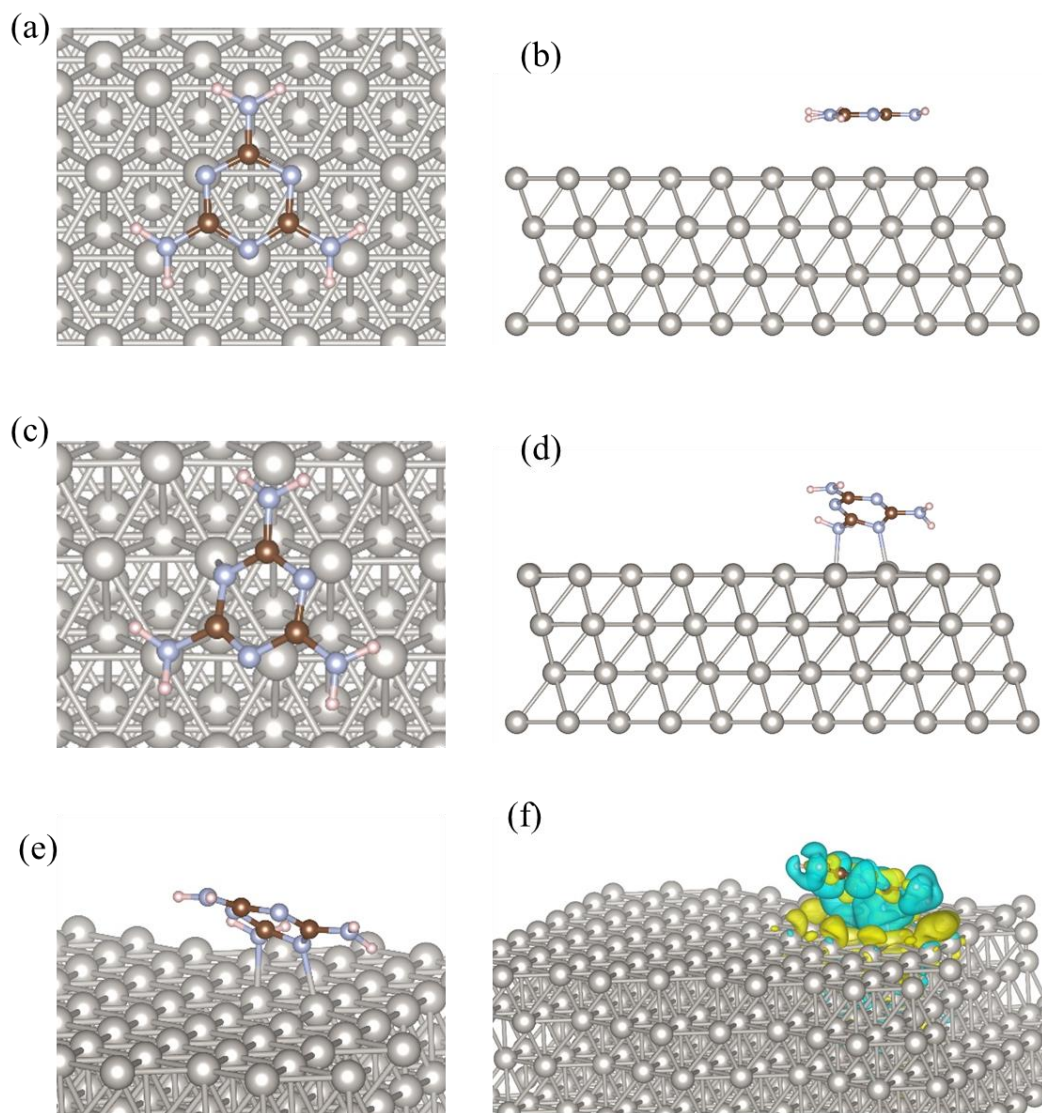

**Figure S75.** (a) Top and (b) side views of entry 53. (c) Top, (d) side, and (e) perspective views of the optimised structures of entry 53. (f) Charge difference distribution of the optimised structure with a threshold of  $0.001 e^-/\text{Bohr}^3$ . Yellow and blue represent decrease and increase of electron density, respectively. The grey, brown, blue, and white balls represent Pt, C, N, and H atoms, respectively.

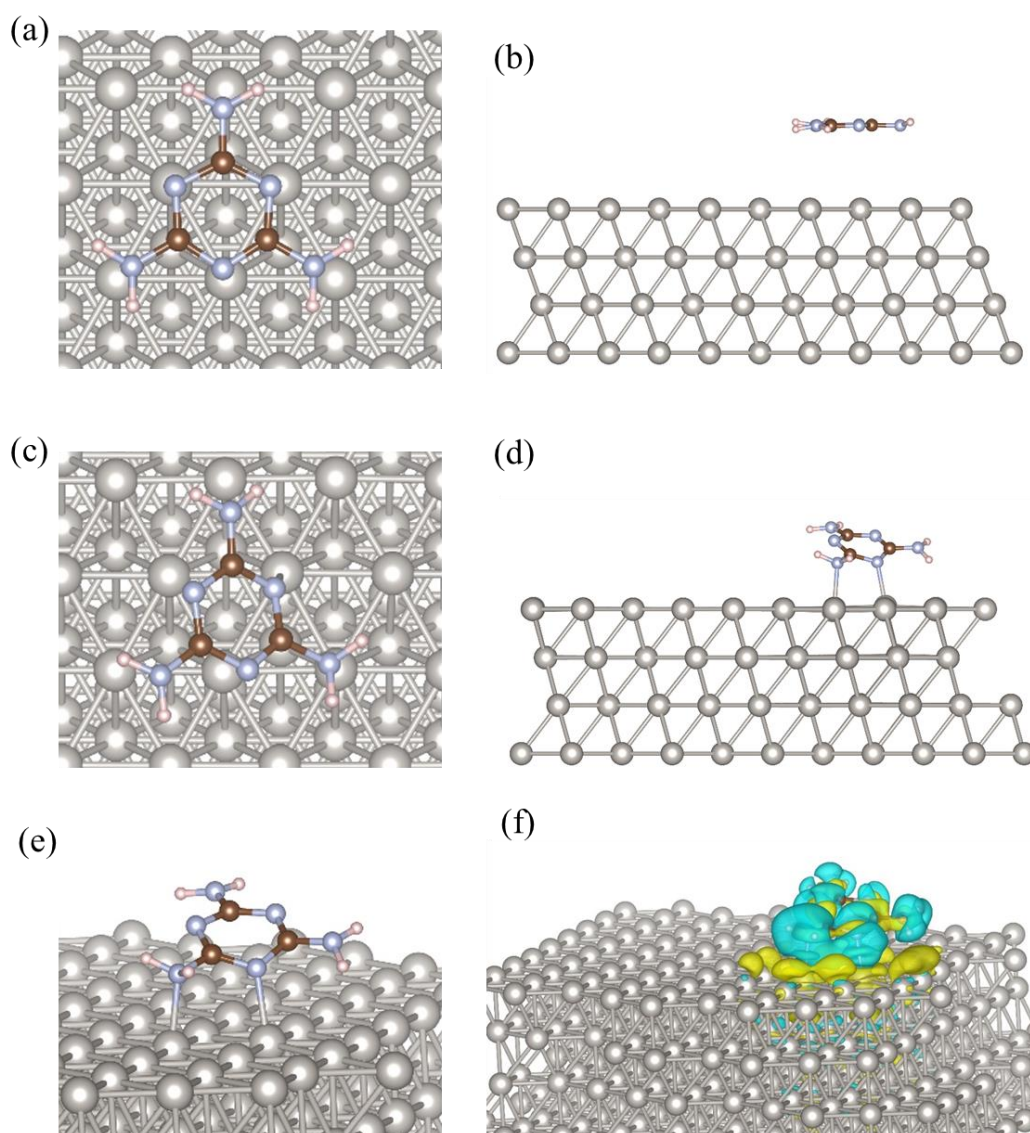

**Figure S76.** (a) Top and (b) side views of entry 54. (c) Top, (d) side, and (e) perspective views of the optimised structures of entry 54. (f) Charge difference distribution of the optimised structure with a threshold of  $0.001 e^-/\text{Bohr}^3$ . Yellow and blue represent decrease and increase of electron density, respectively. The grey, brown, blue, and white balls represent Pt, C, N, and H atoms, respectively.

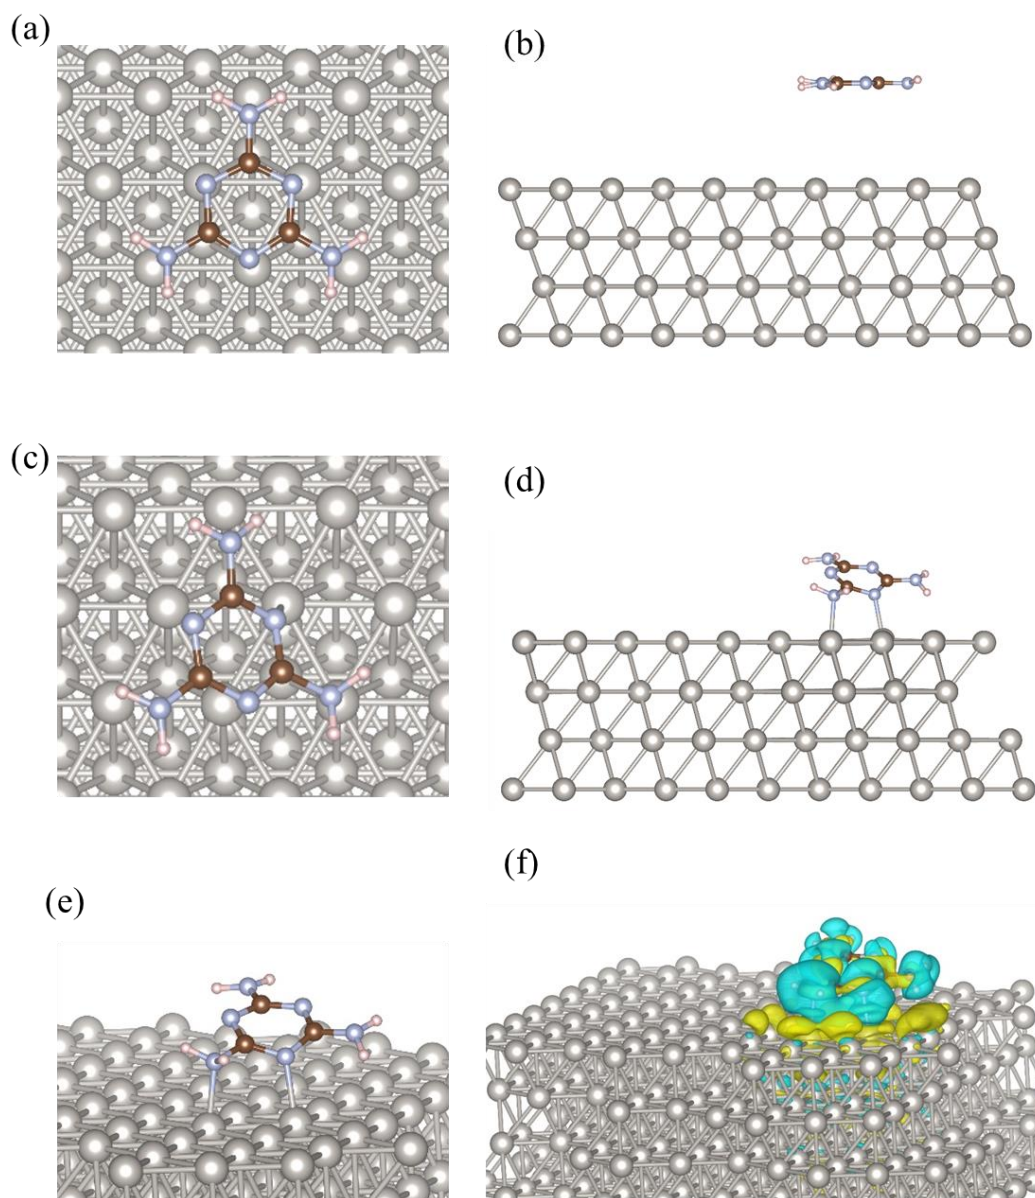

**Figure S77.** (a) Top and (b) side views of entry 55. (c) Top, (d) side, and (e) perspective views of the optimised structures of entry 55. (f) Charge difference distribution of the optimised structure with a threshold of  $0.001 e^-/\text{Bohr}^3$ . Yellow and blue represent decrease and increase of electron density, respectively. The grey, brown, blue, and white balls represent Pt, C, N, and H atoms, respectively.

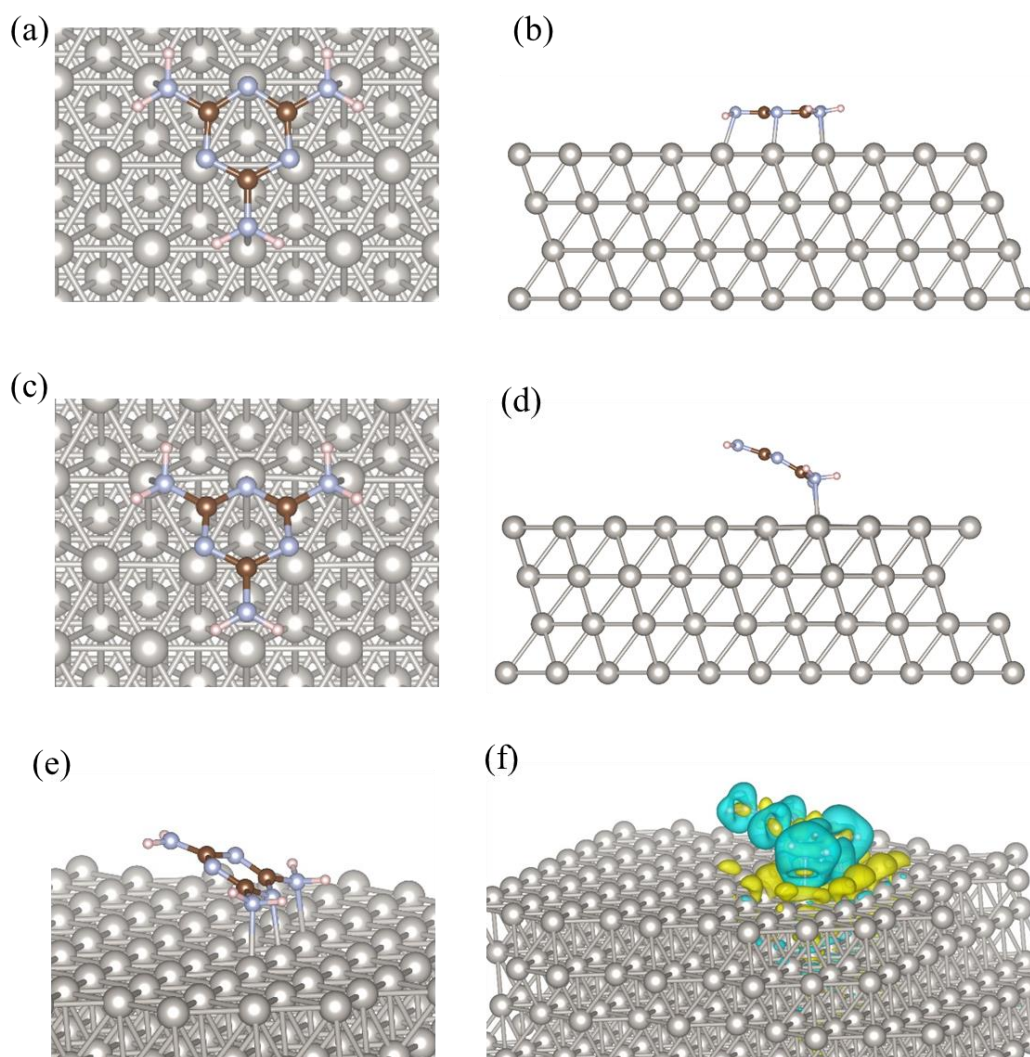

**Figure S78.** (a) Top and (b) side views of entry 56. (c) Top, (d) side, and (e) perspective views of the optimised structures of entry 56. (f) Charge difference distribution of the optimised structure with a threshold of  $0.001 e^-/\text{Bohr}^3$ . Yellow and blue represent decrease and increase of electron density, respectively. The grey, brown, blue, and white balls represent Pt, C, N, and H atoms, respectively.



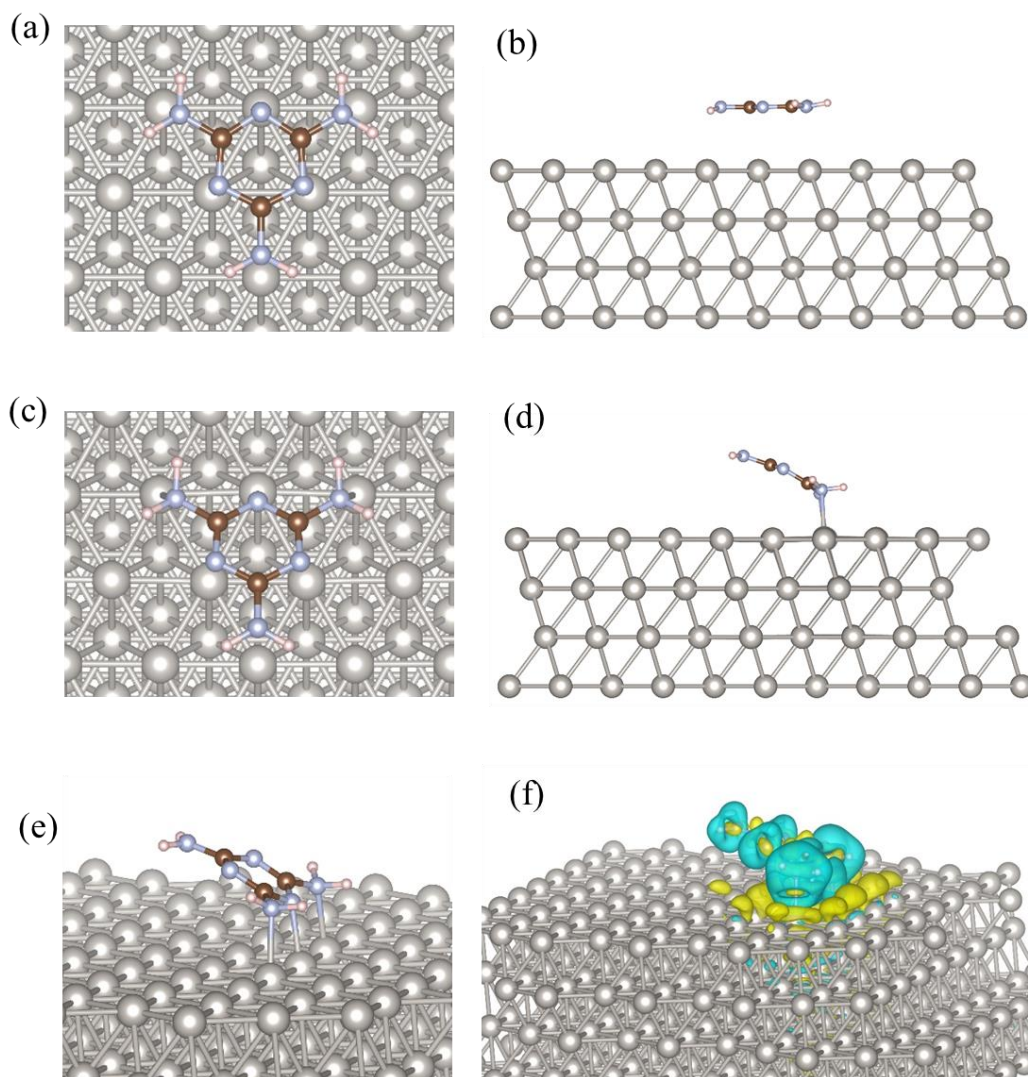

**Figure S79.** (a) Top and (b) side views of entry 57. (c) Top, (d) side, and (e) perspective views of the optimised structures of entry 57. (f) Charge difference distribution of the optimised structure with a threshold of  $0.001 e^-/\text{Bohr}^3$ . Yellow and blue represent decrease and increase of electron density, respectively. The grey, brown, blue, and white balls represent Pt, C, N, and H atoms, respectively.

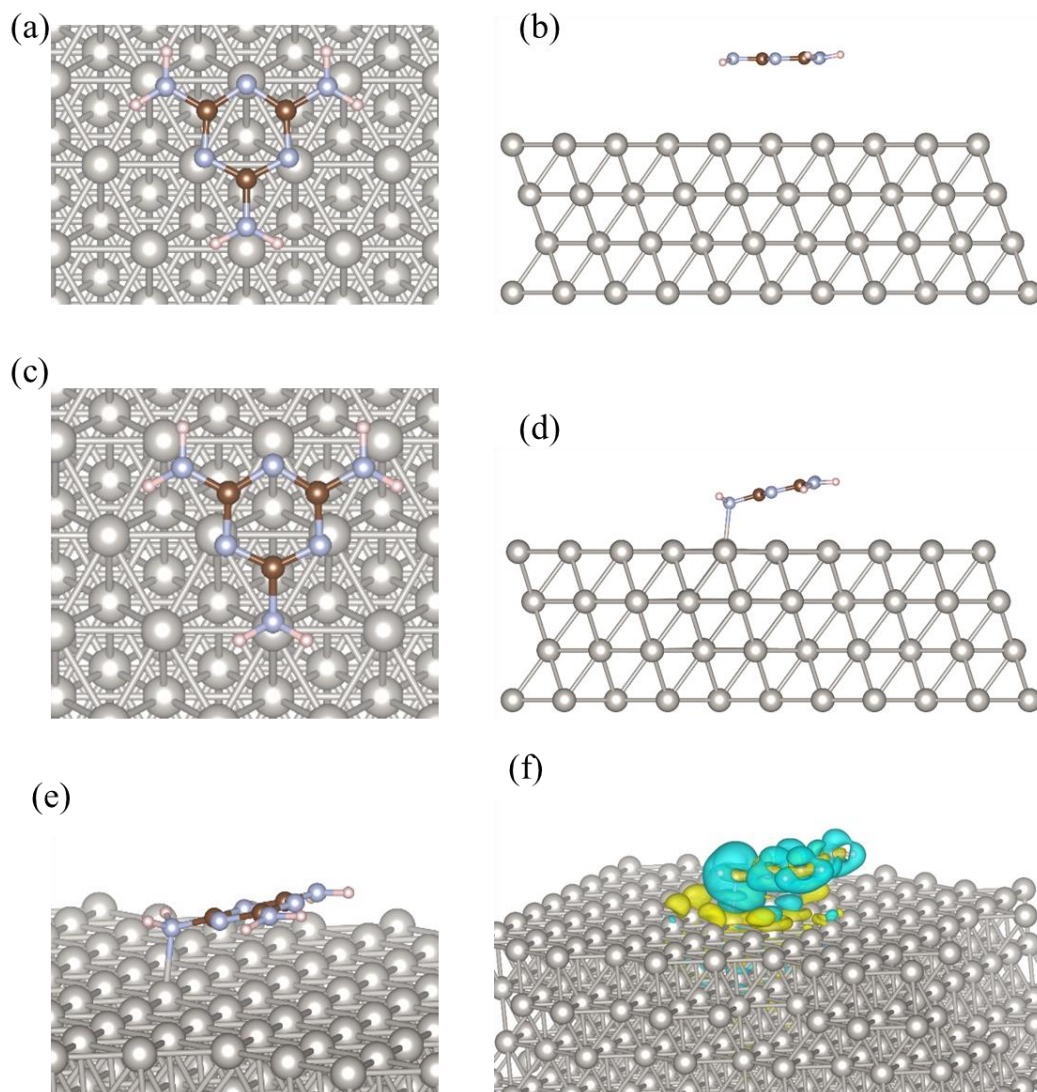

**Figure S80.** (a) Top and (b) side views of entry 58. (c) Top, (d) side, and (e) perspective views of the optimised structures of entry 58. (f) Charge difference distribution of the optimised structure with a threshold of  $0.001 e^-/\text{Bohr}^3$ . Yellow and blue represent decrease and increase of electron density, respectively. The grey, brown, blue, and white balls represent Pt, C, N, and H atoms, respectively.

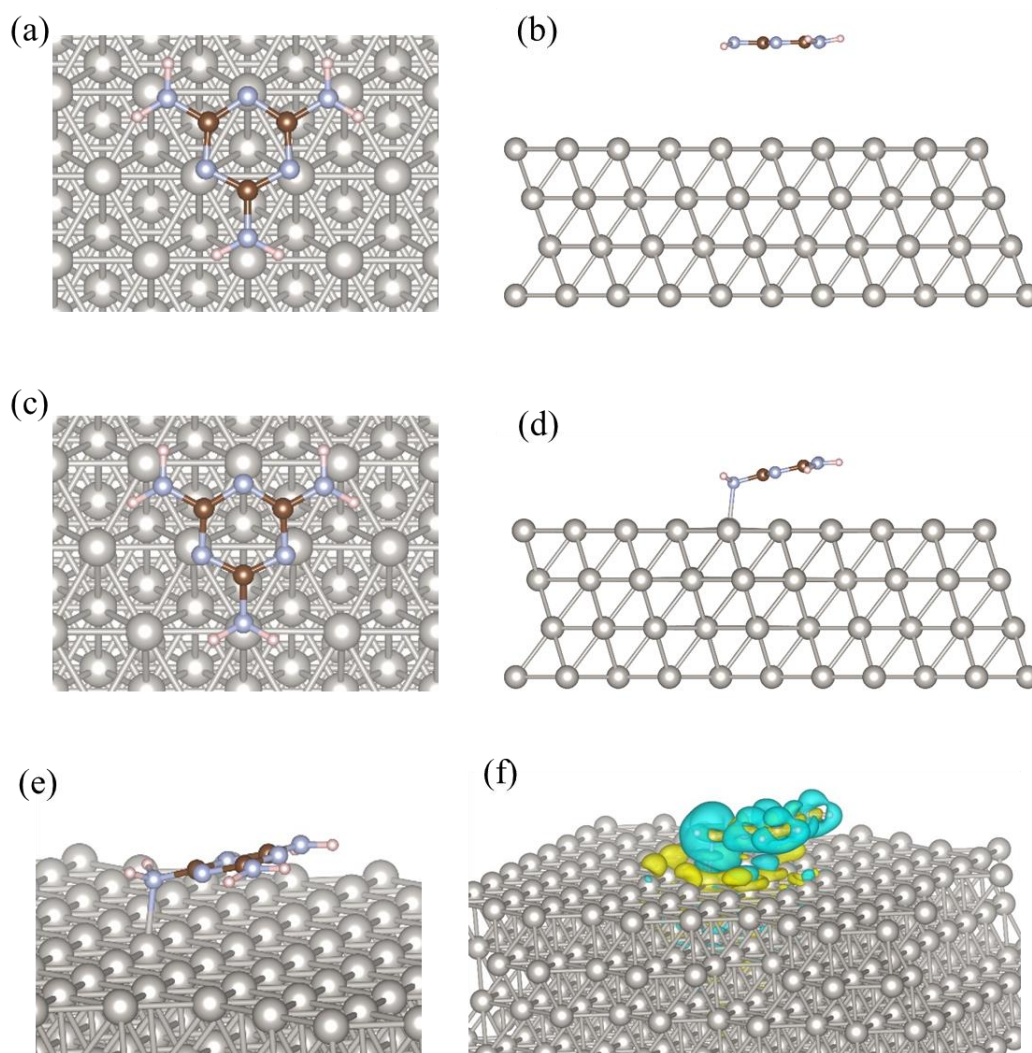

**Figure S81.** (a) Top and (b) side views of entry 59. (c) Top, (d) side, and (e) perspective views of the optimised structures of entry 59. (f) Charge difference distribution of the optimised structure with a threshold of  $0.001 e^-/\text{Bohr}^3$ . Yellow and blue represent decrease and increase of electron density, respectively. The grey, brown, blue, and white balls represent Pt, C, N, and H atoms, respectively.

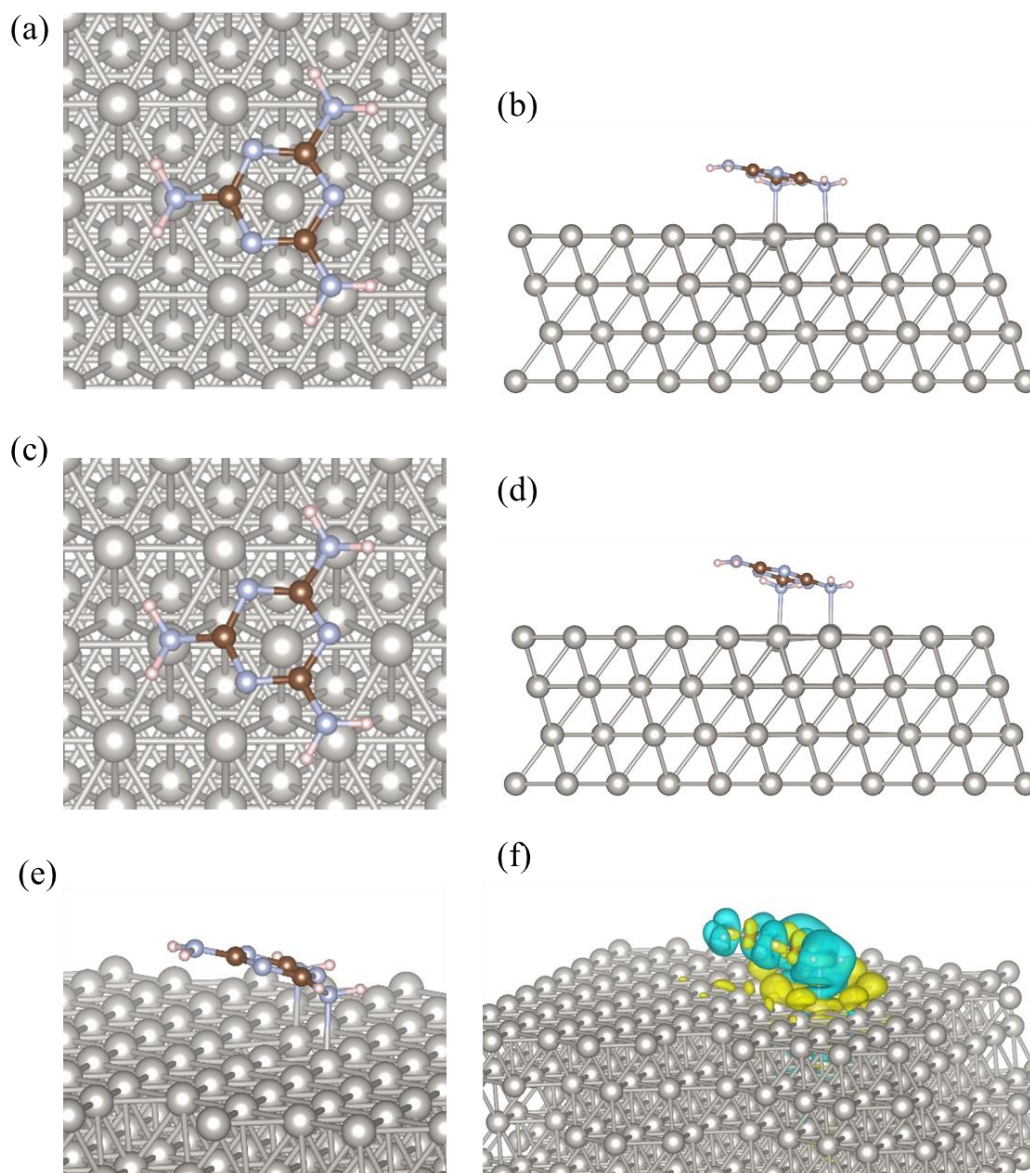

**Figure S82.** (a) Top and (b) side views of entry 60. (c) Top, (d) side, and (e) perspective views of the optimised structures of entry 60. (f) Charge difference distribution of the optimised structure with a threshold of  $0.001 e^-/\text{Bohr}^3$ . Yellow and blue represent decrease and increase of electron density, respectively. The grey, brown, blue, and white balls represent Pt, C, N, and H atoms, respectively.

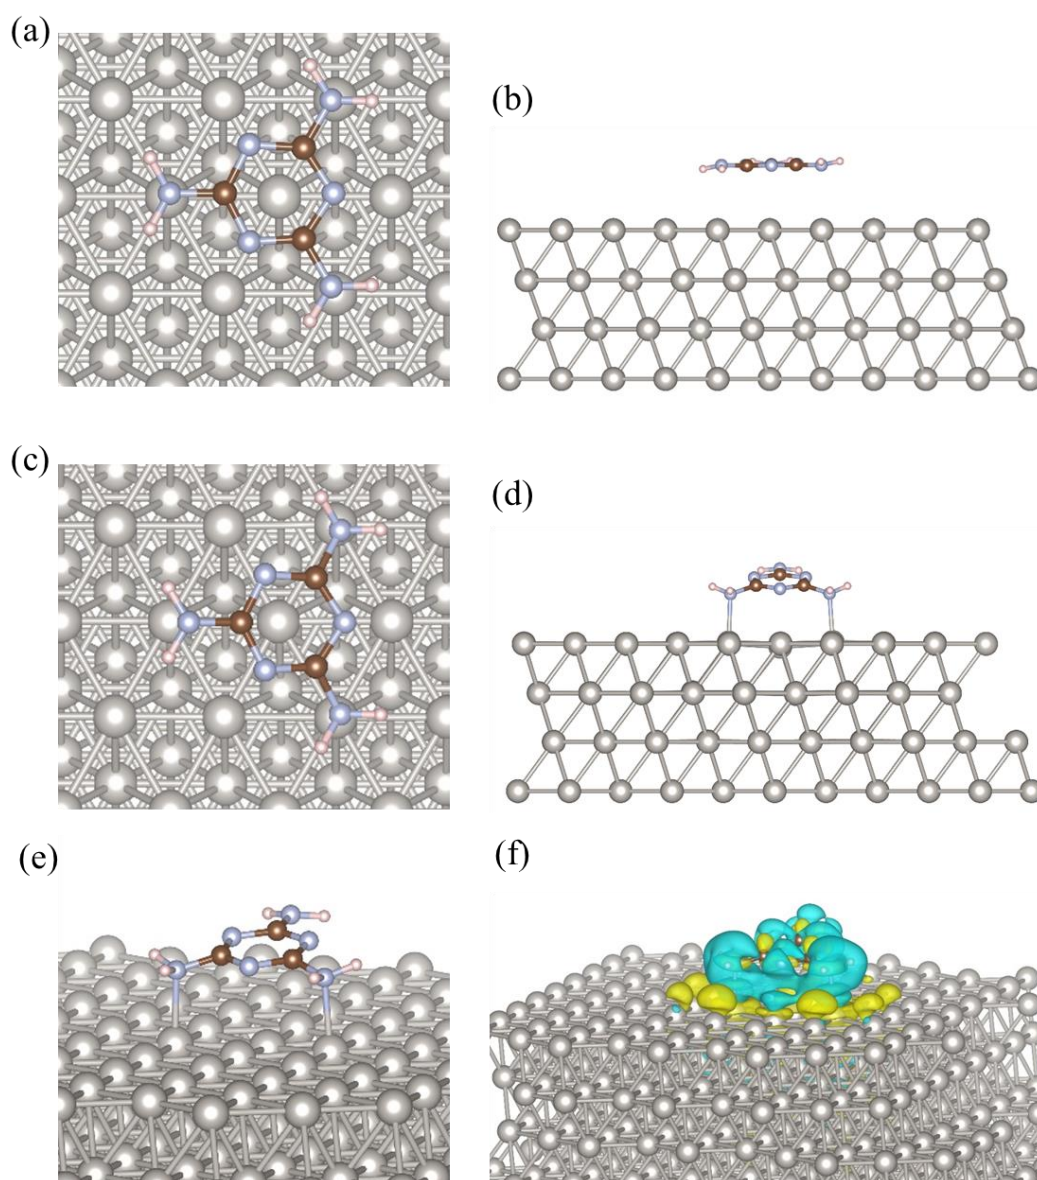

**Figure S83.** (a) Top and (b) side views of entry 61. (c) Top, (d) side, and (e) perspective views of the optimised structures of entry 61. (f) Charge difference distribution of the optimised structure with a threshold of  $0.001 e^-/\text{Bohr}^3$ . Yellow and blue represent decrease and increase of electron density, respectively. The grey, brown, blue, and white balls represent Pt, C, N, and H atoms, respectively.

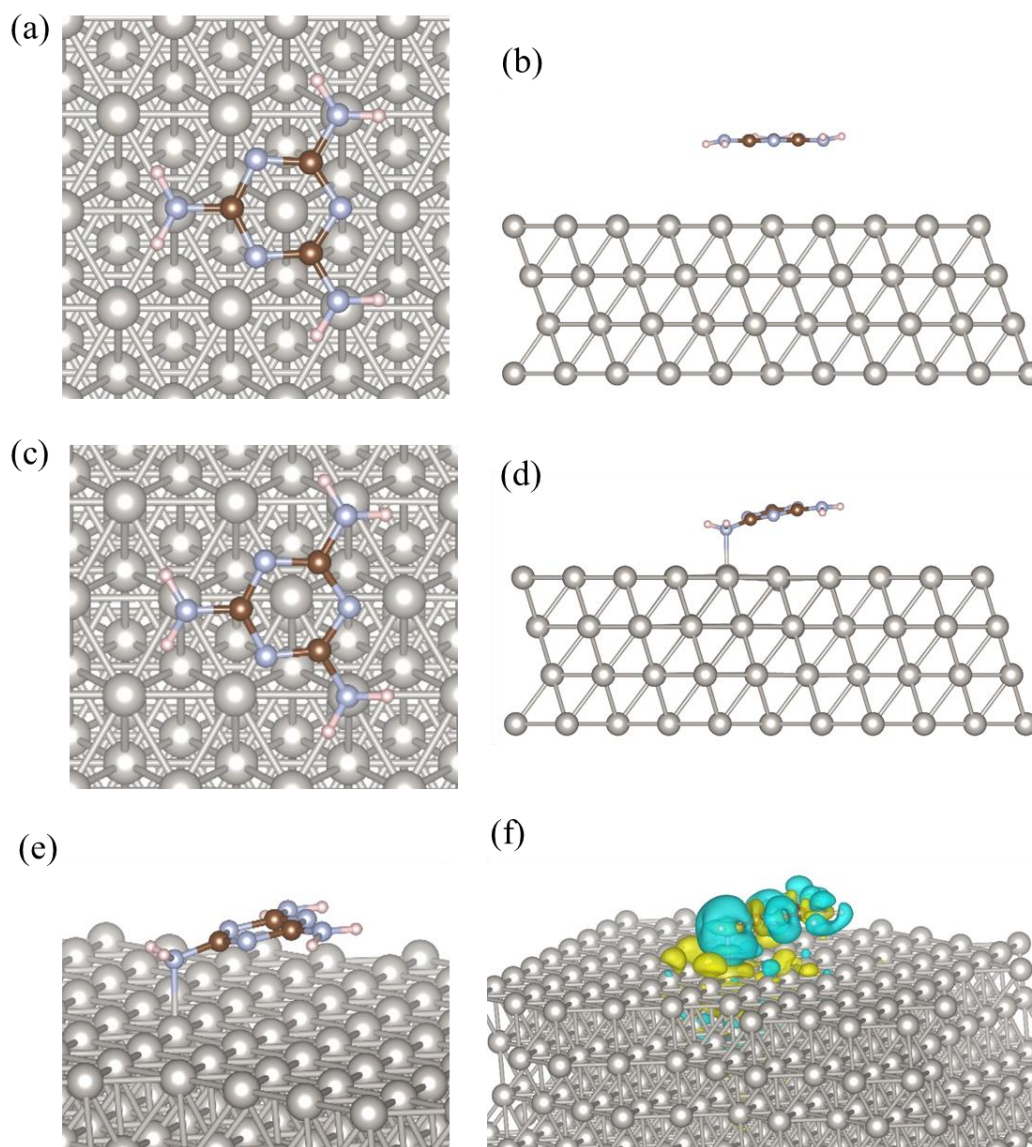

**Figure S84.** (a) Top and (b) side views of entry 62. (c) Top, (d) side, and (e) perspective views of the optimised structures of entry 62. (f) Charge difference distribution of the optimised structure with a threshold of  $0.001 \text{ e}^-/\text{Bohr}^3$ . Yellow and blue represent decrease and increase of electron density, respectively. The grey, brown, blue, and white balls represent Pt, C, N, and H atoms, respectively.

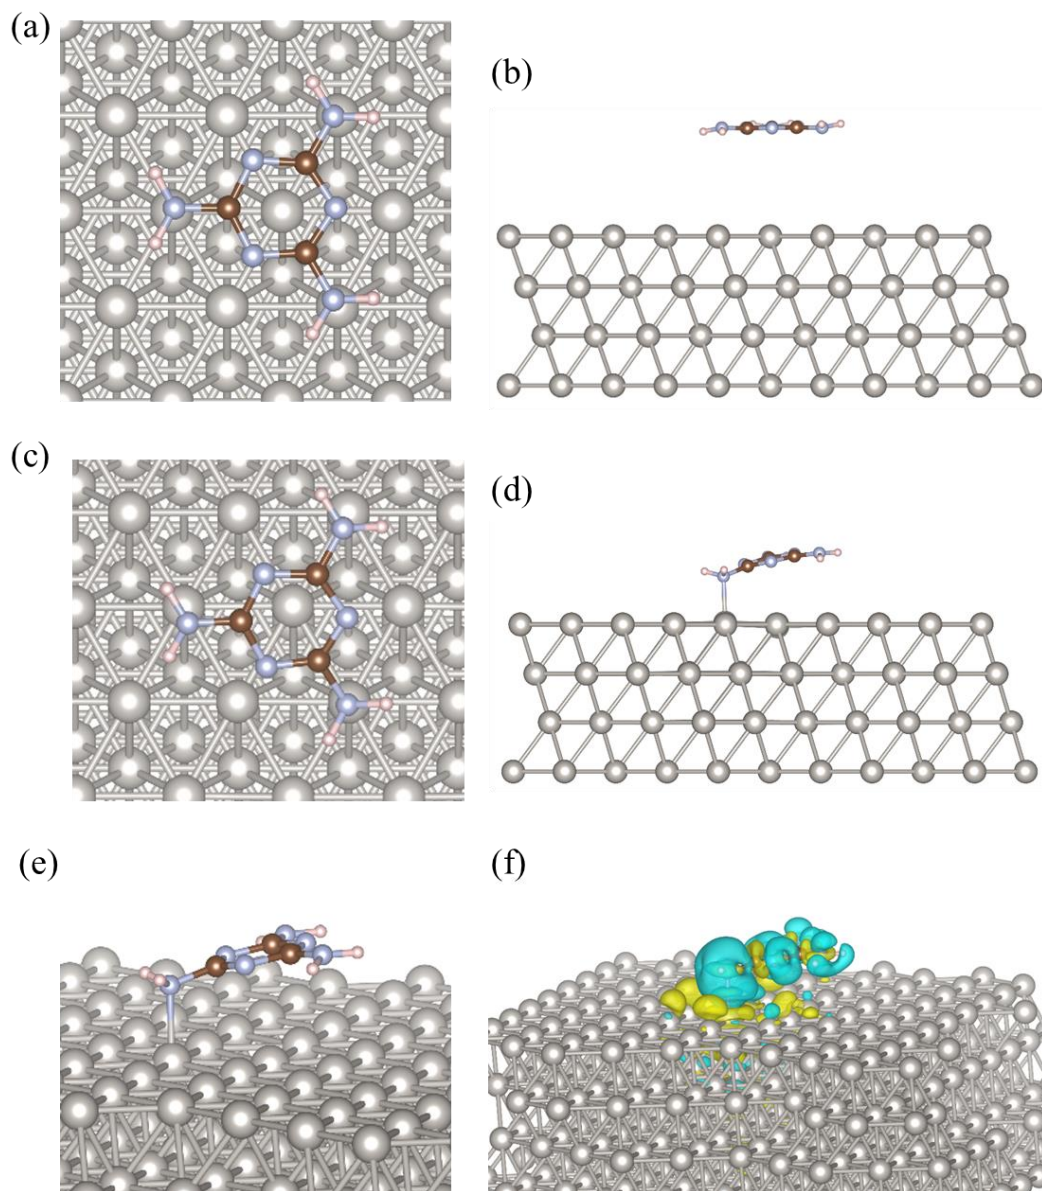

**Figure S85.** (a) Top and (b) side views of entry 63. (c) Top, (d) side, and (e) perspective views of the optimised structures of entry 63. (f) Charge difference distribution of the optimised structure, and the threshold is  $0.001 e^-/\text{Bohr}^3$ . Yellow and blue represent decrease and increase of electron density, respectively. The grey, brown, blue, and white balls represent Pt, C, N, and H atoms, respectively.

**Table S2.** Adsorption type and  $E_{\text{ads}}$ ,  $E_{\text{int}}$ ,  $E_{\text{dis}}(\text{mel.})$ ,  $E_{\text{dis}}(\text{Pt})$ ,  $E_{\text{chem}}$ ,  $E_{\text{phys}}$ ,  $\Delta\rho(\text{mel.})$  values of the optimised structures of entries 1–40

| Entry           | Type | $E_{\text{ads}}$ [eV] | $E_{\text{int}}$ [eV] | $E_{\text{dis}}(\text{mel.})$ [eV] | $E_{\text{dis}}(\text{Pt})$ [eV] | $E_{\text{chem}}$ [eV] | $E_{\text{phys}}$ [eV] | $\Delta\rho$ [e <sup>-</sup> ] |
|-----------------|------|-----------------------|-----------------------|------------------------------------|----------------------------------|------------------------|------------------------|--------------------------------|
| 1               | B    | -2.00                 | -2.50                 | 0.36                               | 0.14                             | -1.18                  | -1.32                  | -0.334                         |
| 2               | B    | -2.11                 | -2.49                 | 0.35                               | 0.03                             | -1.17                  | -1.32                  | -0.334                         |
| 3               | B    | -2.10                 | -2.46                 | 0.33                               | 0.03                             | -1.23                  | -1.23                  | -0.328                         |
| 4               | B    | -2.00                 | -2.50                 | 0.36                               | 0.14                             | -1.18                  | -1.32                  | -0.336                         |
| 5               | B    | -1.99                 | -2.49                 | 0.36                               | 0.14                             | -1.16                  | -1.33                  | -0.338                         |
| 6               | B    | -2.10                 | -2.50                 | 0.36                               | 0.03                             | -1.27                  | -1.23                  | -0.329                         |
| 7               | B    | -1.98                 | -2.53                 | 0.41                               | 0.13                             | -1.35                  | -1.18                  | -0.338                         |
| 8 <sup>a</sup>  | A    | -2.05                 | -2.47                 | 0.25                               | 0.17                             | -1.18                  | -1.29                  | -0.383                         |
| 9               | A    | -2.04                 | -2.49                 | 0.27                               | 0.17                             | -1.22                  | -1.27                  | -0.377                         |
| 10              | B    | -1.97                 | -2.55                 | 0.44                               | 0.13                             | -1.39                  | -1.16                  | -0.337                         |
| 11              | B    | -2.09                 | -2.52                 | 0.40                               | 0.03                             | -1.35                  | -1.17                  | -0.322                         |
| 12              | A    | -2.04                 | -2.43                 | 0.35                               | 0.04                             | -1.11                  | -1.32                  | -0.373                         |
| 13              | A    | -2.03                 | -2.43                 | 0.35                               | 0.04                             | -1.11                  | -1.32                  | -0.373                         |
| 14              | B    | -2.09                 | -2.55                 | 0.37                               | 0.08                             | -1.38                  | -1.17                  | -0.329                         |
| 15              | B    | -2.08                 | -2.52                 | 0.38                               | 0.06                             | -1.37                  | -1.15                  | -0.327                         |
| 16              | A    | -2.02                 | -2.42                 | 0.36                               | 0.05                             | -1.12                  | -1.30                  | -0.371                         |
| 17              | A    | -2.03                 | -2.43                 | 0.36                               | 0.04                             | -1.13                  | -1.30                  | -0.374                         |
| 18              | B    | -2.09                 | -2.51                 | 0.37                               | 0.05                             | -1.33                  | -1.18                  | -0.330                         |
| 19              | B    | -2.09                 | -2.51                 | 0.38                               | 0.04                             | -1.33                  | -1.18                  | -0.328                         |
| 20              | A    | -2.03                 | -2.43                 | 0.37                               | 0.04                             | -1.14                  | -1.29                  | -0.375                         |
| 21              | B    | -2.10                 | -2.57                 | 0.43                               | 0.04                             | -1.39                  | -1.18                  | -0.334                         |
| 22              | C    | -1.88                 | -2.19                 | 0.19                               | 0.12                             | -0.73                  | -1.46                  | -0.315                         |
| 23              | C    | -1.88                 | -2.21                 | 0.20                               | 0.13                             | -0.75                  | -1.46                  | -0.309                         |
| 24              | D    | -1.84                 | -2.05                 | 0.14                               | 0.07                             | -0.65                  | -1.40                  | -0.270                         |
| 25              | B    | -1.98                 | -2.47                 | 0.35                               | 0.13                             | -1.17                  | -1.30                  | -0.333                         |
| 26 <sup>a</sup> | B    | -2.12                 | -2.51                 | 0.35                               | 0.05                             | -1.20                  | -1.31                  | -0.333                         |
| 27              | B    | -2.02                 | -2.54                 | 0.36                               | 0.16                             | -1.22                  | -1.32                  | -0.340                         |
| 28              | C    | -1.88                 | -2.19                 | 0.19                               | 0.12                             | -0.73                  | -1.46                  | -0.315                         |
| 29              | C    | -1.88                 | -2.20                 | 0.20                               | 0.12                             | -0.74                  | -1.46                  | -0.309                         |
| 30 <sup>a</sup> | C    | -1.91                 | -2.22                 | 0.19                               | 0.12                             | -0.76                  | -1.46                  | -0.316                         |
| 31              | C    | -1.88                 | -2.21                 | 0.20                               | 0.13                             | -0.75                  | -1.46                  | -0.309                         |
| 32              | D    | -1.84                 | -2.04                 | 0.14                               | 0.07                             | -0.64                  | -1.40                  | -0.270                         |
| 33              | B    | -2.11                 | -2.49                 | 0.35                               | 0.03                             | -1.18                  | -1.31                  | -0.331                         |
| 34              | D    | -1.86                 | -2.05                 | 0.13                               | 0.06                             | -0.63                  | -1.42                  | -0.302                         |
| 35              | B    | -2.10                 | -2.52                 | 0.34                               | 0.08                             | -1.27                  | -1.25                  | -0.327                         |
| 36              | D    | -1.83                 | -2.02                 | 0.14                               | 0.06                             | -0.64                  | -1.38                  | -0.265                         |
| 37              | D    | -1.83                 | -2.02                 | 0.13                               | 0.05                             | -0.66                  | -1.36                  | -0.268                         |
| 38              | B    | -2.01                 | -2.53                 | 0.36                               | 0.16                             | -1.21                  | -1.32                  | -0.339                         |
| 39              | B    | -2.02                 | -2.54                 | 0.36                               | 0.16                             | -1.23                  | -1.31                  | -0.338                         |
| 40              | D    | -1.83                 | -2.04                 | 0.14                               | 0.07                             | -0.63                  | -1.41                  | -0.263                         |

<sup>a</sup> The entries whose optimised structures are shown in the main text are highlighted in red colour.



**Table S3.** Adsorption type and  $E_{\text{ads}}$ ,  $E_{\text{int}}$ ,  $E_{\text{dis}}(\text{mel.})$ ,  $E_{\text{dis}}(\text{Pt})$ ,  $E_{\text{chem}}$ ,  $E_{\text{phys}}$ ,  $\Delta\rho(\text{mel.})$  values of the optimised structures of entries 41–63

| Entry           | Type | $E_{\text{ads}}$ [eV] | $E_{\text{int}}$ [eV] | $E_{\text{dis}}(\text{mel.})$ [eV] | $E_{\text{dis}}(\text{Pt})$ [eV] | $E_{\text{chem}}$ [eV] | $E_{\text{phys}}$ [eV] | $\Delta\rho$ [e-] |
|-----------------|------|-----------------------|-----------------------|------------------------------------|----------------------------------|------------------------|------------------------|-------------------|
| 41              | D    | -1.84                 | -2.05                 | 0.14                               | 0.07                             | -0.65                  | -1.40                  | -0.264            |
| 42              | B    | -2.01                 | -2.51                 | 0.35                               | 0.16                             | -1.20                  | -1.31                  | -0.336            |
| 43              | B    | -2.01                 | -2.51                 | 0.35                               | 0.16                             | -1.20                  | -1.31                  | -0.337            |
| 44              | D    | -1.85                 | -2.04                 | 0.13                               | 0.06                             | -0.63                  | -1.41                  | -0.299            |
| 45              | D    | -1.85                 | -2.03                 | 0.13                               | 0.05                             | -0.64                  | -1.39                  | -0.282            |
| 46              | D    | -1.86                 | -2.05                 | 0.13                               | 0.05                             | -0.65                  | -1.40                  | -0.297            |
| 47 <sup>a</sup> | D    | -1.88                 | -2.06                 | 0.13                               | 0.05                             | -0.66                  | -1.40                  | -0.293            |
| 48              | B    | -2.12                 | -2.52                 | 0.34                               | 0.06                             | -1.22                  | -1.30                  | -0.330            |
| 49              | B    | -2.11                 | -2.52                 | 0.34                               | 0.06                             | -1.24                  | -1.28                  | -0.327            |
| 50              | B    | -2.11                 | -2.51                 | 0.34                               | 0.07                             | -1.24                  | -1.27                  | -0.327            |
| 51              | B    | -2.09                 | -2.48                 | 0.35                               | 0.04                             | -1.10                  | -1.38                  | -0.349            |
| 52              | B    | -1.99                 | -2.48                 | 0.36                               | 0.14                             | -1.15                  | -1.33                  | -0.337            |
| 53              | B    | -2.09                 | -2.50                 | 0.35                               | 0.06                             | -1.21                  | -1.29                  | -0.328            |
| 54              | B    | -1.87                 | -2.25                 | 0.35                               | 0.03                             | -1.17                  | -1.08                  | -0.329            |
| 55              | B    | -1.88                 | -2.26                 | 0.35                               | 0.03                             | -1.18                  | -1.08                  | -0.327            |
| 56              | A    | -1.92                 | -2.42                 | 0.34                               | 0.16                             | -1.03                  | -1.39                  | -0.379            |
| 57              | A    | -1.92                 | -2.42                 | 0.34                               | 0.16                             | -1.04                  | -1.38                  | -0.379            |
| 58              | D    | -1.87                 | -2.04                 | 0.13                               | 0.05                             | -0.62                  | -1.42                  | -0.308            |
| 59              | D    | -1.88                 | -2.07                 | 0.13                               | 0.06                             | -0.64                  | -1.43                  | -0.303            |
| 60              | C    | -1.91                 | -2.23                 | 0.20                               | 0.13                             | -0.78                  | -1.45                  | -0.309            |
| 61              | C    | -1.88                 | -2.19                 | 0.19                               | 0.12                             | -0.73                  | -1.46                  | -0.311            |
| 62              | D    | -1.85                 | -2.04                 | 0.14                               | 0.06                             | -0.67                  | -1.37                  | -0.264            |
| 63              | D    | -1.85                 | -2.04                 | 0.14                               | 0.06                             | -0.66                  | -1.38                  | -0.271            |

<sup>a</sup> The entries whose optimised structures are shown in the main text are highlighted in red colour.

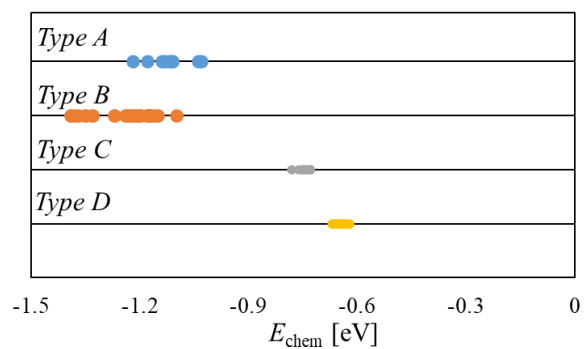

**Figure S86.** Energy distribution of the  $E_{\text{chem}}$  of the four types of adsorption structures.

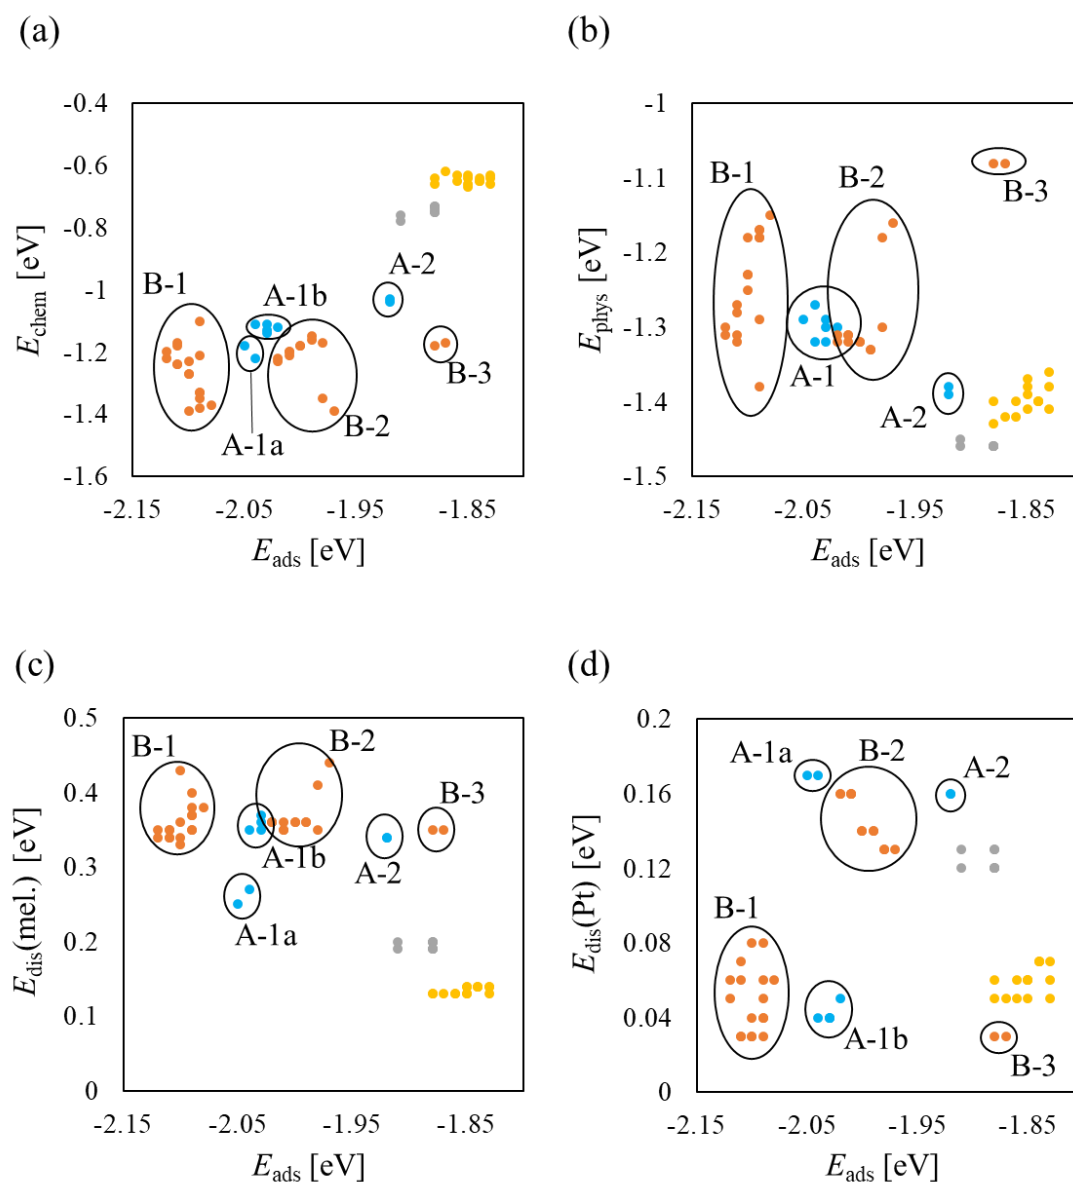

**Figure S87.** Correlation between (a) adsorption energy of melamine onto Pt (111) ( $E_{\text{ads}}$ ) and chemical interaction energy between Pt and melamine ( $E_{\text{chem}}$ ), (b)  $E_{\text{ads}}$  and dispersion forces between Pt and melamine ( $E_{\text{phys}}$ ), (c)  $E_{\text{ads}}$  and distortion energy of melamine ( $E_{\text{dis}}(\text{mel.})$ ), and (d)  $E_{\text{ads}}$  and distortion energy of Pt ( $E_{\text{dis}}(\text{Pt})$ ). The blue, orange, grey, and yellow dots represent adsorption structure Type A, B, C, and D, respectively.

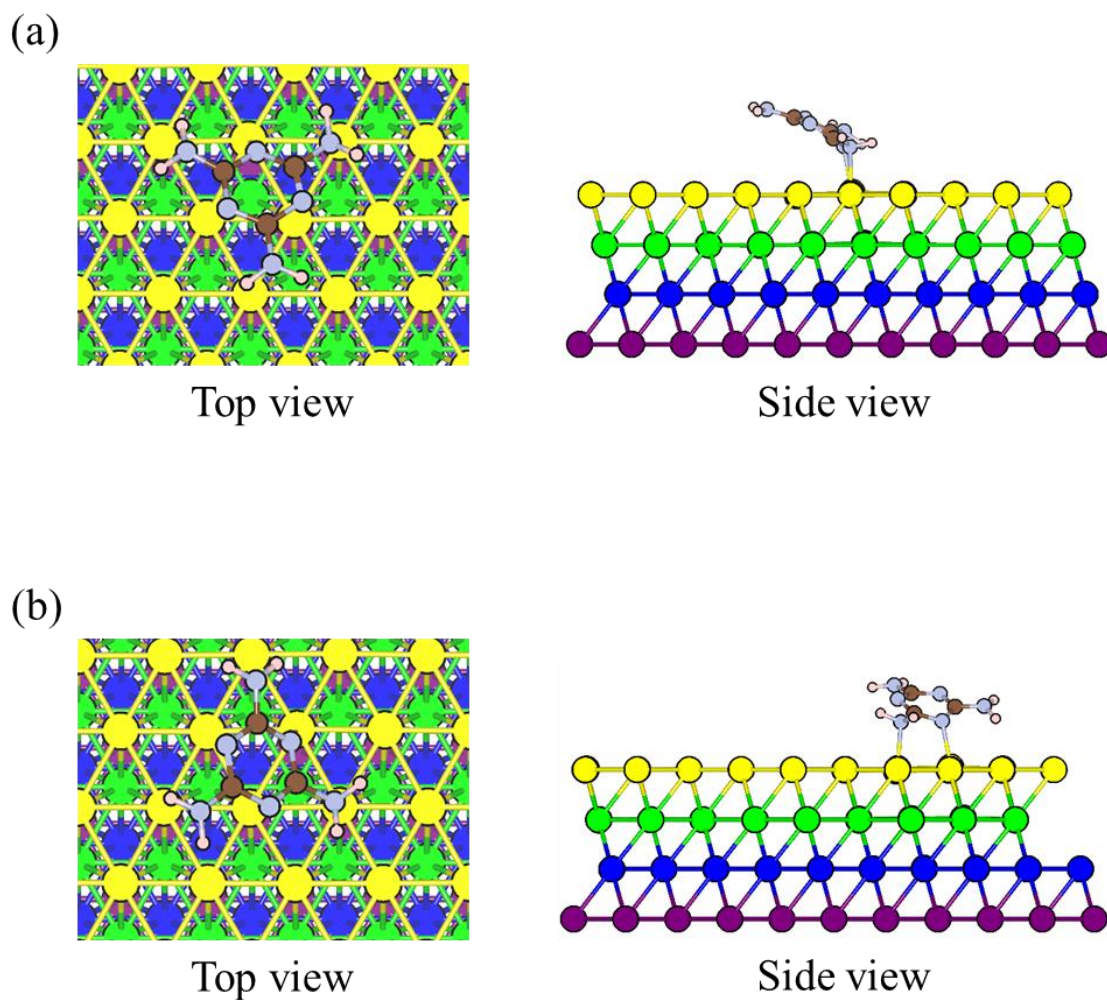

**Figure S88.** Top and side views of the optimised structures of the Type (a) B-1 and (b) B-2. The Pt atoms in the 1st, 2nd, 3rd, and 4th layers are shown in yellow, green, blue, and purple, respectively.

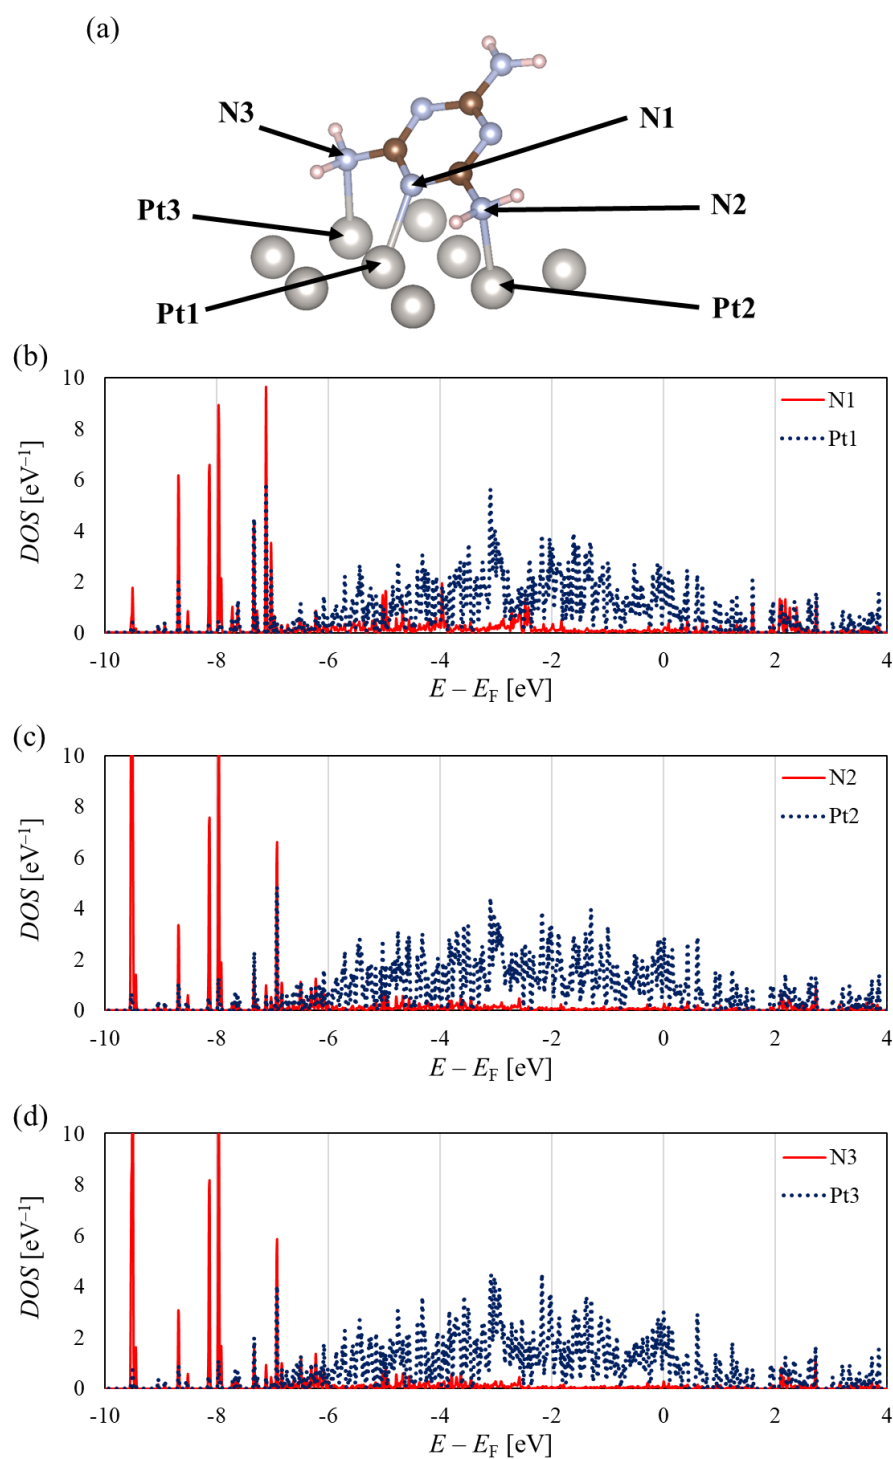

**Figure S89.** (a) Atom labelling for the Type A structure and (b, c, d) projected density of states (PDOS) of Type A (entry 8 in Table S1).  $E_F$  represents the Fermi energy.

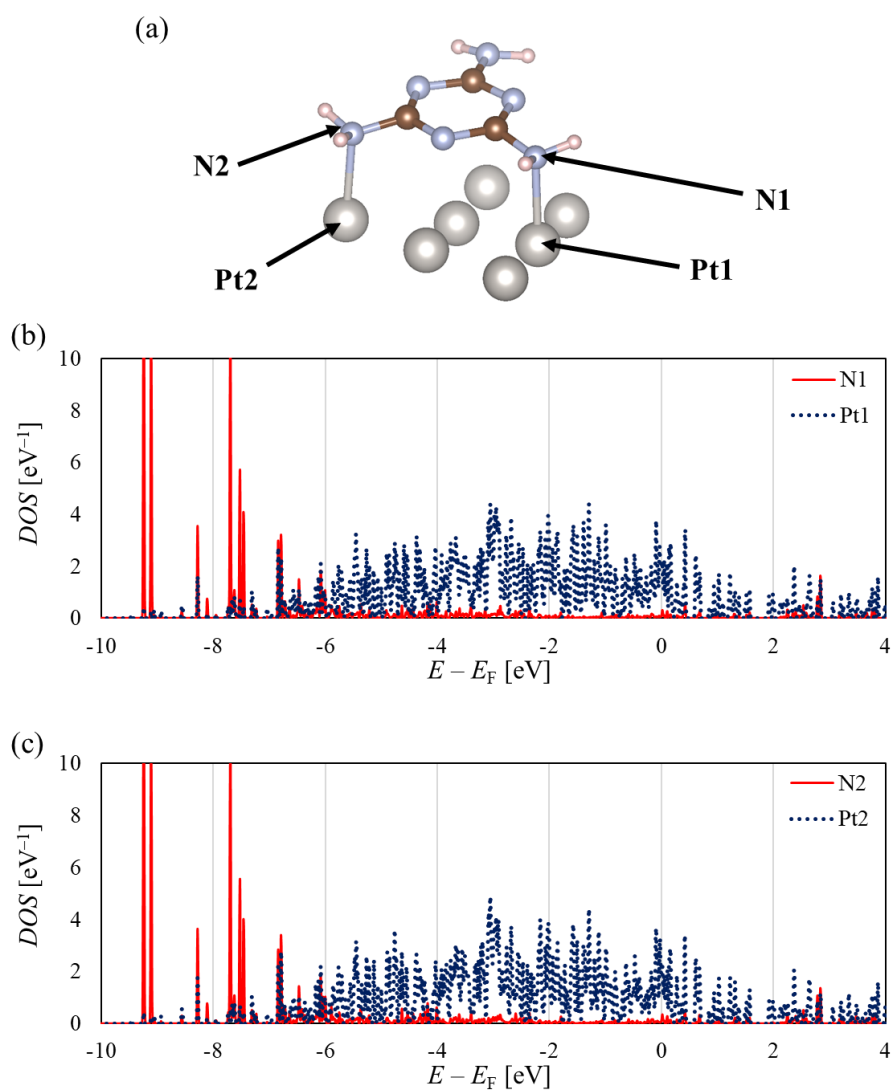

**Figure S90.** (a) Atom labelling for the Type C structure and (b, c) PDOS of Type C (entry 30 in Table S1).  $E_F$  represents the Fermi energy.

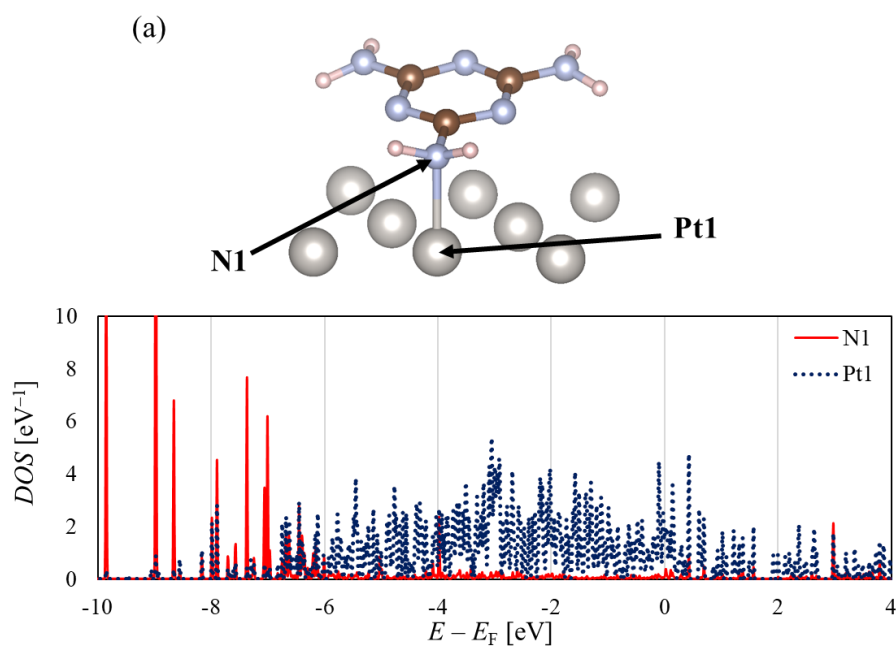

**Figure S91.** (a) Atom labelling for the Type D structure and (b, c) PDOS of Type D (entry 47 in Table S1).  $E_F$  represents the Fermi energy.

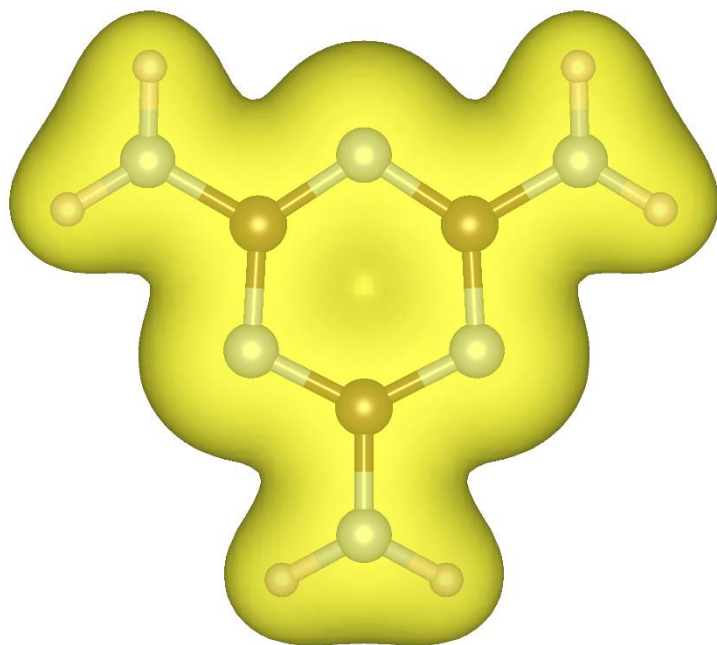

**Figure S92.** Electron density distribution of melamine calculated by PBE/plane-wave. Threshold is  $0.02 \text{ e}^-/\text{Bohr}^3$ .



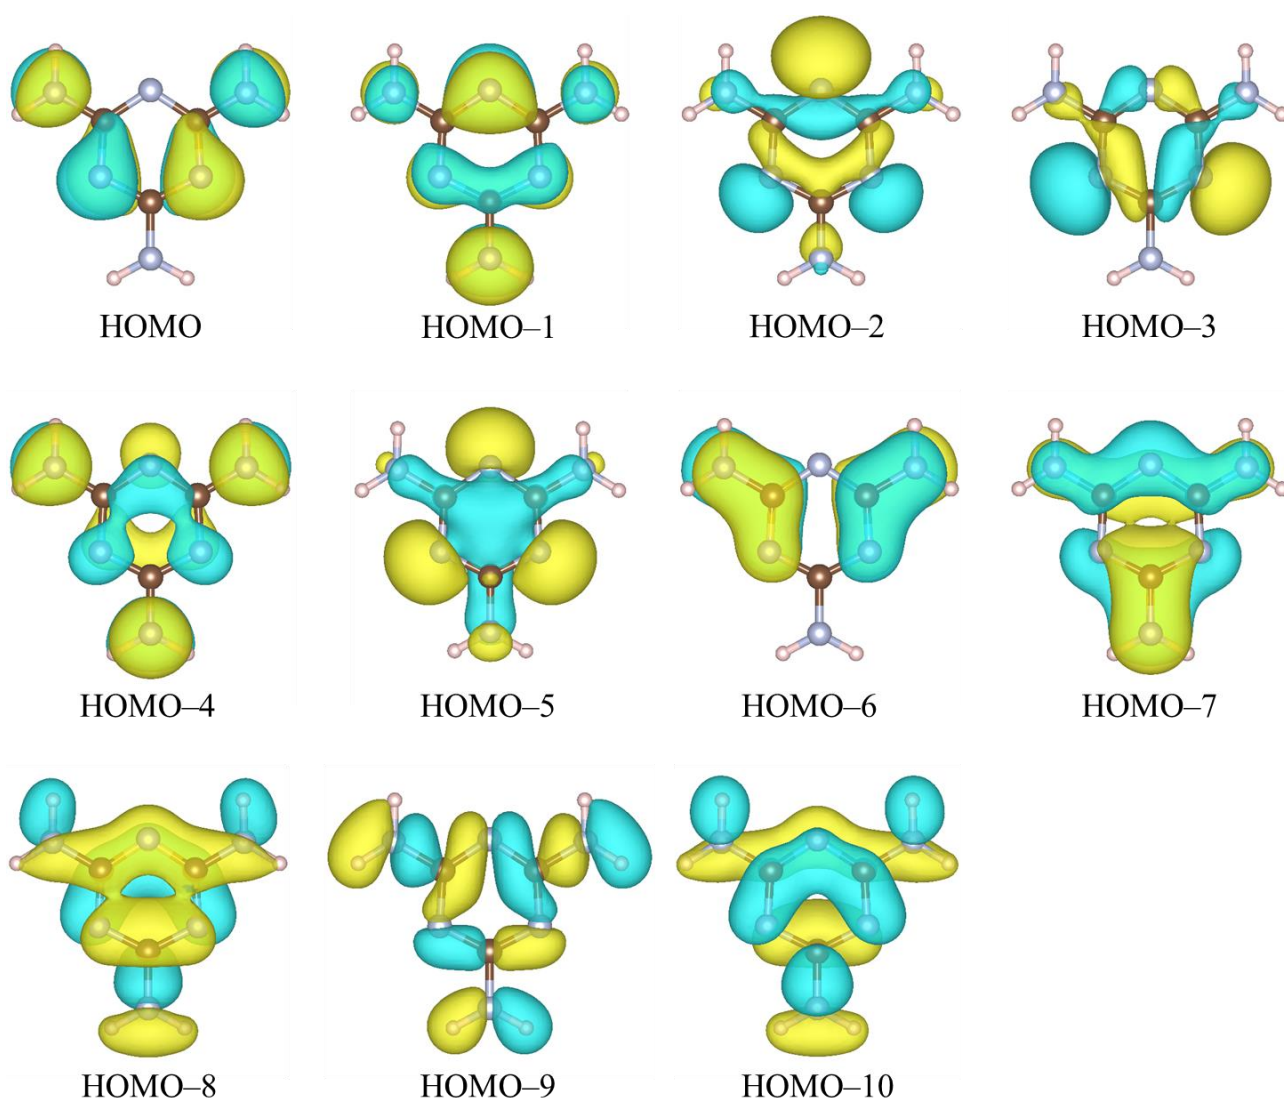

**Figure S93.** Highest occupied molecular orbitals (HOMO) and HOMO- $n$  ( $n = 1-10$ , where  $n$  indicates the  $n^{\text{th}}$  lower orbital from HOMO) of melamine calculated at the PBE/6-311++G(d,p) level. The optimised structure obtained using PBE/plane-wave was used for the calculation.

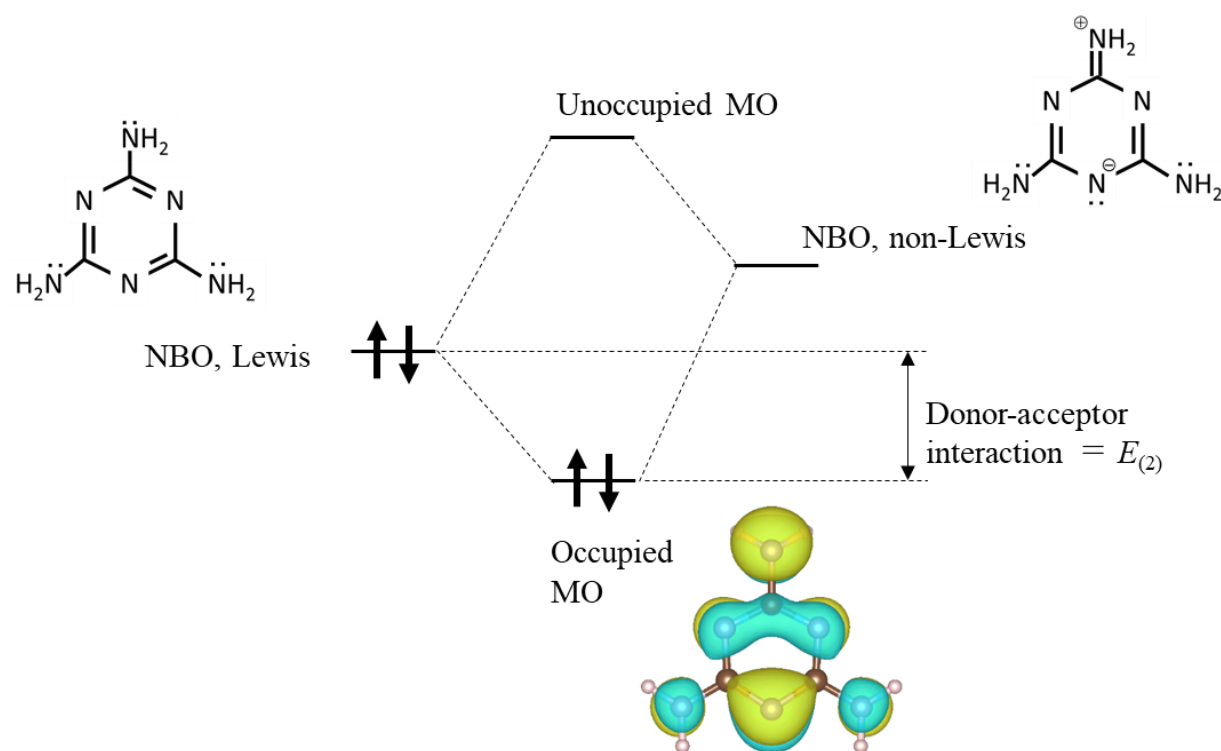

**Figure S94.** Brief explanation of the donor–acceptor interactions between Lewis and non-Lewis structures. The natural bonding orbitals (NBOs) are localised wavefunctions obtained by the following process: (1) the density matrix obtained from a single-referenced method, such as Hartree–Fock or Kohn–Sham equations, was block-diagonalised using the orbital angular momentum of each atom (= natural atomic orbital); (2) the hybrid orbitals were defined from the natural atomic orbitals; and (3) the wavefunctions were constructed using the hybrid orbitals as a basis set. The resonance between the amino group and the triazine ring was considered electron delocalisation from the occupied Lewis orbital of the amino group to the unoccupied non-Lewis orbital of the triazine ring. In this case, the amino group and triazine ring act as the donor and acceptor, respectively. This interaction stabilises the resonance (electron delocalisation). According to the formalism of quantum chemistry, the donor–acceptor interactions can be defined as the stabilisation caused by the linear combination of localised wavefunctions such as Lewis and non-Lewis to afford delocalised wavefunctions. In other words, the resonance stabilisation can be estimated using NBO (localised wavefunction) and molecular (or Kohn–Sham) orbitals (delocalised function). Specifically, the donor–acceptor interactions can be estimated as the second-order perturbation energy  $E_{(2)}$  when the Fock matrix of the NBOs is set to zeroth order and its difference with the Fock matrix of the original molecular (or Kohn–Sham) orbitals is treated as the perturbation.

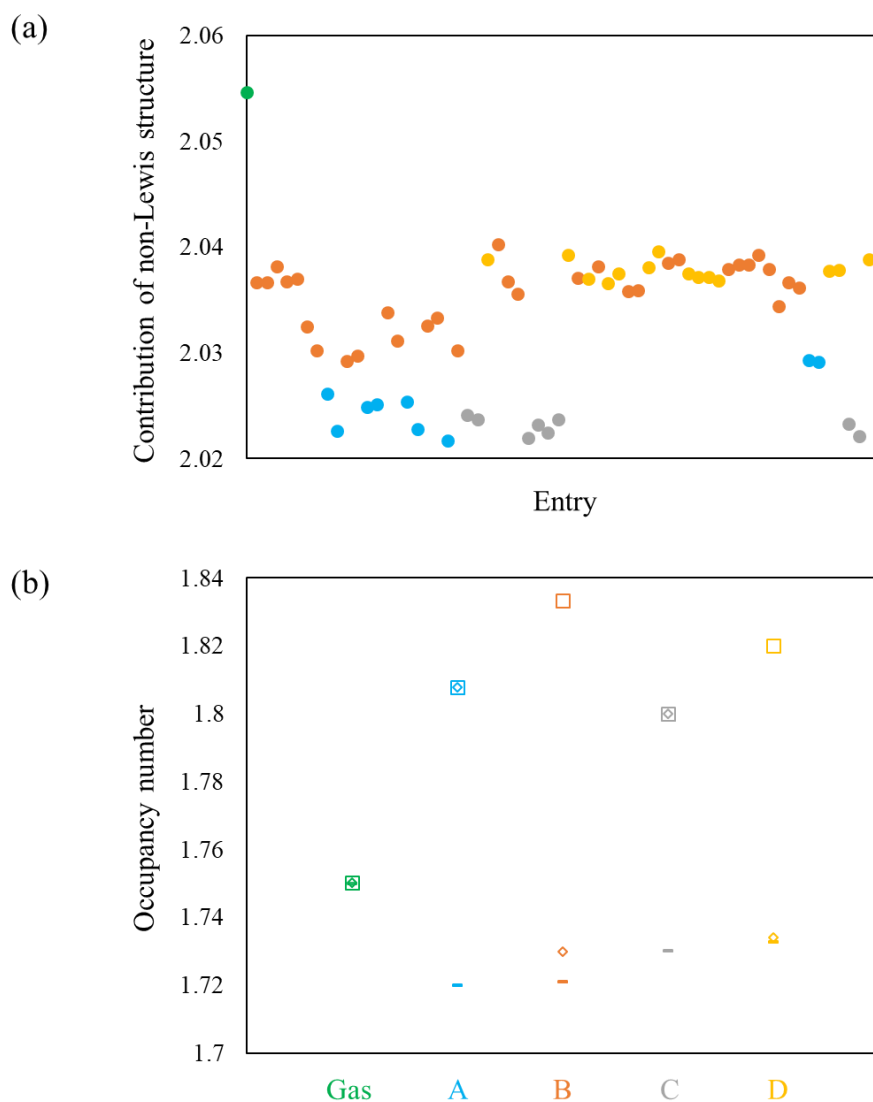

**Figure S95.** (a) Summation of the occupancies of the non-Lewis structure of melamine molecule with and without distortion caused by Pt(111) adsorption. The green, blue, red-brown, grey, and yellow dots represent melamine molecule in the gas phase and Type A, B, C, and D adsorption structures, respectively. (b) Lone-pair occupancies of NH<sub>2</sub> in the melamine molecule. Green represents the value for the optimised melamine structure in the gas phase, and blue, red-brown, grey, and yellow represent the average values of the melamine molecules in the Type A, B, C, and -D adsorption structures, respectively. The square, diamond, and bar represent maximum, median and minimum values, respectively.

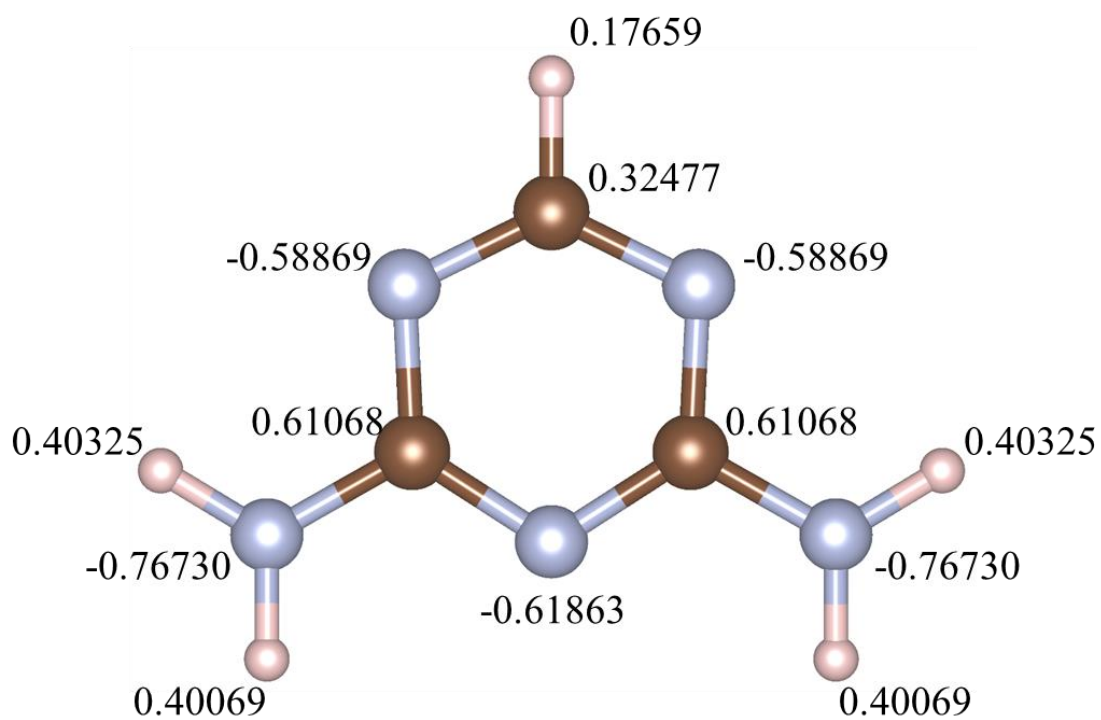

**Figure S96.** Charges of melamine calculated by NBO analysis. The optimised structure obtained using PBE/plane-wave was used for the calculation.

**Table S4.** Adsorption angles for the diamino-triazine and amino-triazine molecules

| Adsorbed molecule | Adsorption structure | Angles [°]                            |
|-------------------|----------------------|---------------------------------------|
| Diamino triazine  | Fig. 8(a)            | 34.5 <sup>a</sup> , 30.7 <sup>b</sup> |
| Diamino triazine  | Fig. 8(b)            | 50.2 <sup>a</sup> , 47.7 <sup>b</sup> |
| Amino triazine    | Fig. 8(c)            | 51.6 <sup>a</sup> , 50.1 <sup>b</sup> |

<sup>a</sup> Angle between the Pt surface and the straight line connecting the N<sub>triazine</sub> adsorbed on Pt and the C atom furthest from the Pt surface.

<sup>b</sup> Angle between the Pt surface and the straight line connecting the N<sub>triazine</sub> adsorbed on Pt and the substituent (H or N<sub>amino</sub>) bonded to the C atom furthest from the Pt surface.

**Table S5.** Atomic coordinates (cartesian; Å) of the Type A structure shown in Fig. 1(a)

| Atom label | X [Å]    | Y [Å]    | Z [Å]    |
|------------|----------|----------|----------|
| N1         | 21.40001 | 0.566739 | 9.10245  |
| N2         | 19.93848 | 1.775349 | 10.56805 |
| N3         | 19.92069 | 18.60483 | 10.56906 |
| N4         | 21.31688 | 2.919444 | 9.11391  |
| N5         | 18.42388 | 0.594354 | 11.8402  |
| N6         | 21.30031 | 17.44185 | 9.122771 |
| C1         | 20.88205 | 1.707614 | 9.645594 |
| C2         | 19.44331 | 0.582587 | 10.97167 |
| C3         | 20.86768 | 18.65663 | 9.64832  |
| H1         | 20.93434 | 3.721698 | 9.621732 |
| H2         | 18.00531 | 1.480304 | 12.10147 |
| H3         | 20.92246 | 16.6392  | 9.632797 |
| H4         | 0.140741 | 2.990063 | 8.941582 |
| H5         | 17.98593 | 18.9433  | 12.10822 |
| H6         | 0.122501 | 17.37699 | 8.945217 |
| Pt1        | 0.000000 | 0.000000 | 0.000000 |
| Pt2        | 4.161946 | 2.4029   | 0.000000 |
| Pt3        | 1.387315 | 2.4029   | 0.000000 |
| Pt4        | 0.000000 | 4.805801 | 0.000000 |
| Pt5        | 1.387315 | 7.208701 | 0.000000 |
| Pt6        | 4.161946 | 7.208701 | 0.000000 |
| Pt7        | 2.774631 | 0.000000 | 0.000000 |
| Pt8        | 2.774631 | 4.805801 | 0.000000 |
| Pt9        | 4.16391  | 8.972542 | 2.312048 |
| Pt10       | 1.38661  | 8.966097 | 2.310955 |
| Pt11       | 22.1934  | 1.755113 | 2.355223 |
| Pt12       | 22.19318 | 6.564805 | 2.311367 |
| Pt13       | 2.743786 | 1.757151 | 2.343155 |
| Pt14       | 1.369257 | 4.160082 | 2.306647 |
| Pt15       | 4.14678  | 4.163841 | 2.30304  |
| Pt16       | 2.772258 | 6.565716 | 2.305242 |
| Pt17       | 4.171698 | 5.971869 | 4.581313 |
| Pt18       | 1.396219 | 5.969439 | 4.57751  |
| Pt19       | 22.19281 | 8.369082 | 4.593442 |

|      |          |          |          |
|------|----------|----------|----------|
| Pt20 | 0.001982 | 3.571841 | 4.624292 |
| Pt21 | 1.331898 | 1.139481 | 4.706964 |
| Pt22 | 4.145037 | 1.161207 | 4.600779 |
| Pt23 | 2.777065 | 3.560418 | 4.569412 |
| Pt24 | 2.776096 | 8.370546 | 4.587323 |
| Pt25 | 0.032461 | 0.594567 | 7.062132 |
| Pt26 | 4.18741  | 2.952001 | 6.912399 |
| Pt27 | 1.465141 | 2.965103 | 6.900299 |
| Pt28 | 0.01165  | 5.398926 | 6.891462 |
| Pt29 | 1.387975 | 7.75719  | 6.90309  |
| Pt30 | 4.161663 | 7.746493 | 6.896356 |
| Pt31 | 2.827703 | 0.527456 | 6.938876 |
| Pt32 | 2.784797 | 5.351187 | 6.890677 |
| Pt33 | 5.549261 | 0.000000 | 0.000000 |
| Pt34 | 9.711207 | 2.4029   | 0.000000 |
| Pt35 | 6.936576 | 2.4029   | 0.000000 |
| Pt36 | 5.549261 | 4.805801 | 0.000000 |
| Pt37 | 6.936576 | 7.208701 | 0.000000 |
| Pt38 | 9.711207 | 7.208701 | 0.000000 |
| Pt39 | 8.323892 | 0.000000 | 0.000000 |
| Pt40 | 8.323892 | 4.805801 | 0.000000 |
| Pt41 | 9.712165 | 8.978058 | 2.310937 |
| Pt42 | 6.939681 | 8.979013 | 2.312489 |
| Pt43 | 5.52103  | 1.763233 | 2.31403  |
| Pt44 | 5.550777 | 6.572317 | 2.309215 |
| Pt45 | 8.310123 | 1.76573  | 2.308559 |
| Pt46 | 6.924907 | 4.166817 | 2.308024 |
| Pt47 | 9.703393 | 4.16972  | 2.312472 |
| Pt48 | 8.324505 | 6.574048 | 2.309608 |
| Pt49 | 9.71134  | 5.969524 | 4.58779  |
| Pt50 | 6.944441 | 5.969494 | 4.589003 |
| Pt51 | 5.5532   | 8.374937 | 4.588016 |
| Pt52 | 5.544621 | 3.569253 | 4.584453 |
| Pt53 | 6.925971 | 1.168447 | 4.583584 |
| Pt54 | 9.702919 | 1.165264 | 4.582202 |
| Pt55 | 8.31885  | 3.565521 | 4.588544 |
| Pt56 | 8.325332 | 8.374883 | 4.590719 |

## ARTICLE

## Journal Name

|      |          |          |          |
|------|----------|----------|----------|
| Pt57 | 5.562865 | 0.532577 | 6.906263 |
| Pt58 | 9.707758 | 2.928713 | 6.899647 |
| Pt59 | 6.936584 | 2.937523 | 6.899536 |
| Pt60 | 5.560566 | 5.348723 | 6.903105 |
| Pt61 | 6.936756 | 7.73881  | 6.905037 |
| Pt62 | 9.706189 | 7.737179 | 6.902529 |
| Pt63 | 8.317194 | 0.530334 | 6.896196 |
| Pt64 | 8.326599 | 5.334697 | 6.905265 |
| Pt65 | 11.09852 | 0.000000 | 0.000000 |
| Pt66 | 15.26047 | 2.4029   | 0.000000 |
| Pt67 | 12.48584 | 2.4029   | 0.000000 |
| Pt68 | 11.09852 | 4.805801 | 0.000000 |
| Pt69 | 12.48584 | 7.208701 | 0.000000 |
| Pt70 | 15.26047 | 7.208701 | 0.000000 |
| Pt71 | 13.87315 | 0.000000 | 0.000000 |
| Pt72 | 13.87315 | 4.805801 | 0.000000 |
| Pt73 | 15.26095 | 8.975623 | 2.314907 |
| Pt74 | 12.48535 | 8.978464 | 2.310877 |
| Pt75 | 11.0951  | 1.766413 | 2.309106 |
| Pt76 | 11.09999 | 6.573749 | 2.311243 |
| Pt77 | 13.87629 | 1.764545 | 2.305233 |
| Pt78 | 12.48436 | 4.168624 | 2.309189 |
| Pt79 | 15.26906 | 4.16894  | 2.312992 |
| Pt80 | 13.87443 | 6.572592 | 2.312837 |
| Pt81 | 15.25405 | 5.972271 | 4.59171  |
| Pt82 | 12.48057 | 5.969112 | 4.593309 |
| Pt83 | 11.09451 | 8.374186 | 4.590144 |
| Pt84 | 11.09275 | 3.567252 | 4.58506  |
| Pt85 | 12.47958 | 1.16549  | 4.584997 |
| Pt86 | 15.24906 | 1.171075 | 4.583795 |
| Pt87 | 13.8648  | 3.571535 | 4.585222 |
| Pt88 | 13.86392 | 8.373876 | 4.589811 |
| Pt89 | 11.08496 | 0.528944 | 6.893311 |
| Pt90 | 15.23111 | 2.955639 | 6.910198 |
| Pt91 | 12.47452 | 2.938753 | 6.897548 |
| Pt92 | 11.08762 | 5.334868 | 6.908158 |
| Pt93 | 12.47381 | 7.742626 | 6.907544 |



|       |          |          |          |
|-------|----------|----------|----------|
| Pt94  | 15.23843 | 7.74922  | 6.905225 |
| Pt95  | 13.85658 | 0.536274 | 6.898794 |
| Pt96  | 13.85358 | 5.343372 | 6.911848 |
| Pt97  | 16.64778 | 0.000000 | 0.000000 |
| Pt98  | 20.80973 | 2.4029   | 0.000000 |
| Pt99  | 18.0351  | 2.4029   | 0.000000 |
| Pt100 | 16.64778 | 4.805801 | 0.000000 |
| Pt101 | 18.0351  | 7.208701 | 0.000000 |
| Pt102 | 20.80973 | 7.208701 | 0.000000 |
| Pt103 | 19.42241 | 0.000000 | 0.000000 |
| Pt104 | 19.42241 | 4.805801 | 0.000000 |
| Pt105 | 20.80988 | 8.970779 | 2.312972 |
| Pt106 | 18.03542 | 8.966584 | 2.309642 |
| Pt107 | 16.65561 | 1.762165 | 2.307549 |
| Pt108 | 16.65258 | 6.565321 | 2.309703 |
| Pt109 | 19.44034 | 1.759865 | 2.313012 |
| Pt110 | 18.04775 | 4.160232 | 2.330996 |
| Pt111 | 20.80887 | 4.153682 | 2.328565 |
| Pt112 | 19.42932 | 6.562134 | 2.312392 |
| Pt113 | 20.80645 | 5.973112 | 4.600154 |
| Pt114 | 18.03043 | 5.961747 | 4.588607 |
| Pt115 | 16.63863 | 8.372671 | 4.589407 |
| Pt116 | 16.64022 | 3.569386 | 4.590831 |
| Pt117 | 18.01261 | 1.161361 | 4.562047 |
| Pt118 | 20.8008  | 1.15683  | 4.651976 |
| Pt119 | 19.44332 | 3.555104 | 4.638415 |
| Pt120 | 19.4155  | 8.367677 | 4.590567 |
| Pt121 | 16.59063 | 0.547577 | 6.919813 |
| Pt122 | 20.74115 | 3.030253 | 6.944507 |
| Pt123 | 17.96942 | 2.952031 | 6.917236 |
| Pt124 | 16.62827 | 5.359493 | 6.911166 |
| Pt125 | 18.01955 | 7.756389 | 6.899998 |
| Pt126 | 20.80179 | 7.772514 | 6.918222 |
| Pt127 | 19.29913 | 0.541822 | 6.840596 |
| Pt128 | 19.38933 | 5.399269 | 6.927378 |
| Pt129 | 0.000000 | 9.611602 | 0.000000 |
| Pt130 | 4.161946 | 12.0145  | 0.000000 |

| ARTICLE |          |          | Journal Name |
|---------|----------|----------|--------------|
| Pt131   | 1.387315 | 12.0145  | 0.000000     |
| Pt132   | 0.000000 | 14.4174  | 0.000000     |
| Pt133   | 1.387315 | 16.8203  | 0.000000     |
| Pt134   | 4.161946 | 16.8203  | 0.000000     |
| Pt135   | 2.774631 | 9.611602 | 0.000000     |
| Pt136   | 2.774631 | 14.4174  | 0.000000     |
| Pt137   | 4.153274 | 18.58739 | 2.307876     |
| Pt138   | 1.377656 | 18.59218 | 2.331486     |
| Pt139   | 22.19444 | 11.37634 | 2.310556     |
| Pt140   | 22.19648 | 16.19269 | 2.314524     |
| Pt141   | 2.770717 | 11.37376 | 2.311043     |
| Pt142   | 1.385895 | 13.78289 | 2.310039     |
| Pt143   | 4.158964 | 13.7812  | 2.312873     |
| Pt144   | 2.774746 | 16.18629 | 2.307962     |
| Pt145   | 4.165037 | 15.58314 | 4.593133     |
| Pt146   | 1.393025 | 15.57759 | 4.583685     |
| Pt147   | 22.19037 | 17.97863 | 4.633121     |
| Pt148   | 22.19438 | 13.16674 | 4.580418     |
| Pt149   | 1.382782 | 10.76773 | 4.589979     |
| Pt150   | 4.15633  | 10.77506 | 4.593987     |
| Pt151   | 2.772748 | 13.17464 | 4.591241     |
| Pt152   | 2.782616 | 17.98893 | 4.583293     |
| Pt153   | 22.18976 | 10.15253 | 6.909573     |
| Pt154   | 4.163179 | 12.54321 | 6.906759     |
| Pt155   | 1.384372 | 12.53931 | 6.902078     |
| Pt156   | 0.013252 | 14.92348 | 6.886629     |
| Pt157   | 1.446948 | 17.32301 | 6.877655     |
| Pt158   | 4.180374 | 17.34848 | 6.912513     |
| Pt159   | 2.766389 | 10.14796 | 6.904565     |
| Pt160   | 2.786005 | 14.93785 | 6.906929     |
| Pt161   | 5.549261 | 9.611602 | 0.000000     |
| Pt162   | 9.711207 | 12.0145  | 0.000000     |
| Pt163   | 6.936576 | 12.0145  | 0.000000     |
| Pt164   | 5.549261 | 14.4174  | 0.000000     |
| Pt165   | 6.936576 | 16.8203  | 0.000000     |
| Pt166   | 9.711207 | 16.8203  | 0.000000     |
| Pt167   | 8.323892 | 9.611602 | 0.000000     |

|       |          |          |          |
|-------|----------|----------|----------|
| Pt168 | 8.323892 | 14.4174  | 0.000000 |
| Pt169 | 9.710956 | 18.58898 | 2.311426 |
| Pt170 | 6.931624 | 18.58731 | 2.306014 |
| Pt171 | 5.543623 | 11.37695 | 2.313791 |
| Pt172 | 5.547323 | 16.18527 | 2.311221 |
| Pt173 | 8.320222 | 11.38133 | 2.312109 |
| Pt174 | 6.929588 | 13.78287 | 2.310703 |
| Pt175 | 9.705632 | 13.7824  | 2.311641 |
| Pt176 | 8.323795 | 16.18595 | 2.312941 |
| Pt177 | 9.710343 | 15.58195 | 4.588439 |
| Pt178 | 6.934485 | 15.58219 | 4.591029 |
| Pt179 | 5.548066 | 17.98731 | 4.585106 |
| Pt180 | 5.544614 | 13.1784  | 4.591816 |
| Pt181 | 6.932445 | 10.77698 | 4.590634 |
| Pt182 | 9.704678 | 10.77895 | 4.590791 |
| Pt183 | 8.316389 | 13.18034 | 4.590181 |
| Pt184 | 8.318304 | 17.98594 | 4.587713 |
| Pt185 | 5.551192 | 10.13971 | 6.904883 |
| Pt186 | 9.705733 | 12.54799 | 6.903112 |
| Pt187 | 6.933482 | 12.54151 | 6.906585 |
| Pt188 | 5.556803 | 14.93915 | 6.907526 |
| Pt189 | 6.934554 | 17.34562 | 6.899798 |
| Pt190 | 9.70779  | 17.35133 | 6.90066  |
| Pt191 | 8.31732  | 10.14301 | 6.905017 |
| Pt192 | 8.323343 | 14.94704 | 6.902704 |
| Pt193 | 11.09852 | 9.611602 | 0.000000 |
| Pt194 | 15.26047 | 12.0145  | 0.000000 |
| Pt195 | 12.48584 | 12.0145  | 0.000000 |
| Pt196 | 11.09852 | 14.4174  | 0.000000 |
| Pt197 | 12.48584 | 16.8203  | 0.000000 |
| Pt198 | 15.26047 | 16.8203  | 0.000000 |
| Pt199 | 13.87315 | 9.611602 | 0.000000 |
| Pt200 | 13.87315 | 14.4174  | 0.000000 |
| Pt201 | 15.27425 | 18.58265 | 2.311094 |
| Pt202 | 12.49247 | 18.58607 | 2.309215 |
| Pt203 | 11.09605 | 11.38101 | 2.310366 |
| Pt204 | 11.10042 | 16.18576 | 2.313769 |

| ARTICLE |          |          | Journal Name |
|---------|----------|----------|--------------|
| Pt205   | 13.87223 | 11.38064 | 2.313768     |
| Pt206   | 12.48263 | 13.78376 | 2.312516     |
| Pt207   | 15.2601  | 13.78007 | 2.315704     |
| Pt208   | 13.8774  | 16.18195 | 2.309475     |
| Pt209   | 15.25995 | 15.5833  | 4.593706     |
| Pt210   | 12.48983 | 15.58162 | 4.591566     |
| Pt211   | 11.09465 | 17.98359 | 4.584103     |
| Pt212   | 11.09354 | 13.18079 | 4.590986     |
| Pt213   | 12.47889 | 10.77795 | 4.590438     |
| Pt214   | 15.25172 | 10.78074 | 4.594004     |
| Pt215   | 13.86925 | 13.18018 | 4.590781     |
| Pt216   | 13.87171 | 17.98724 | 4.58635      |
| Pt217   | 11.08918 | 10.14532 | 6.902077     |
| Pt218   | 15.24429 | 12.54956 | 6.909816     |
| Pt219   | 12.47994 | 12.54775 | 6.902489     |
| Pt220   | 11.08778 | 14.95404 | 6.905315     |
| Pt221   | 12.47479 | 17.35232 | 6.897566     |
| Pt222   | 15.23281 | 17.3507  | 6.911888     |
| Pt223   | 13.86072 | 10.14334 | 6.907619     |
| Pt224   | 13.86078 | 14.94651 | 6.907677     |
| Pt225   | 16.64778 | 9.611602 | 0.000000     |
| Pt226   | 20.80973 | 12.0145  | 0.000000     |
| Pt227   | 18.0351  | 12.0145  | 0.000000     |
| Pt228   | 16.64778 | 14.4174  | 0.000000     |
| Pt229   | 18.0351  | 16.8203  | 0.000000     |
| Pt230   | 20.80973 | 16.8203  | 0.000000     |
| Pt231   | 19.42241 | 9.611602 | 0.000000     |
| Pt232   | 19.42241 | 14.4174  | 0.000000     |
| Pt233   | 20.81406 | 18.58585 | 2.333784     |
| Pt234   | 18.04675 | 18.58256 | 2.321268     |
| Pt235   | 16.6443  | 11.37461 | 2.313613     |
| Pt236   | 16.65265 | 16.17981 | 2.31345      |
| Pt237   | 19.41824 | 11.37433 | 2.311321     |
| Pt238   | 18.03013 | 13.77872 | 2.310537     |
| Pt239   | 20.80451 | 13.78682 | 2.308966     |
| Pt240   | 19.426   | 16.18763 | 2.324751     |
| Pt241   | 20.81437 | 15.567   | 4.604923     |

|       |          |          |          |
|-------|----------|----------|----------|
| Pt242 | 18.0308  | 15.57469 | 4.602268 |
| Pt243 | 16.64301 | 17.98354 | 4.593217 |
| Pt244 | 16.64557 | 13.181   | 4.597242 |
| Pt245 | 18.02714 | 10.77248 | 4.59031  |
| Pt246 | 20.80373 | 10.76848 | 4.589396 |
| Pt247 | 19.42123 | 13.17058 | 4.586277 |
| Pt248 | 19.43351 | 17.95734 | 4.623674 |
| Pt249 | 16.63595 | 10.15449 | 6.902184 |
| Pt250 | 20.80373 | 12.54447 | 6.903917 |
| Pt251 | 18.02528 | 12.54986 | 6.904894 |
| Pt252 | 16.62995 | 14.95369 | 6.919003 |
| Pt253 | 17.97257 | 17.3474  | 6.922624 |
| Pt254 | 20.75644 | 17.35414 | 6.925287 |
| Pt255 | 19.412   | 10.15147 | 6.901938 |
| Pt256 | 19.40048 | 14.92511 | 6.910419 |

**Table S6.** Atomic coordinates (cartesian; Å) of the Type B structure shown in Fig. 1(b)

| Atom label | X [Å]    | Y [Å]    | Z [Å]    |
|------------|----------|----------|----------|
| N1         | 21.06255 | 17.85896 | 10.19446 |
| N2         | 19.60525 | 0.211721 | 9.148359 |
| N3         | 18.68879 | 17.63328 | 10.43135 |
| N4         | 21.94804 | 0.499306 | 9.110497 |
| N5         | 17.3795  | 0.218389 | 9.84387  |
| N6         | 20.11065 | 15.86161 | 10.84924 |
| C1         | 20.82093 | 18.95595 | 9.512058 |
| C2         | 18.56165 | 18.8103  | 9.813195 |
| C3         | 19.93399 | 17.13484 | 10.47333 |
| H1         | 21.82681 | 1.502443 | 9.301251 |
| H2         | 17.23589 | 1.040071 | 9.248885 |
| H3         | 19.29799 | 15.26268 | 10.9512  |
| H4         | 0.601695 | 0.126066 | 9.54505  |
| H5         | 16.56301 | 18.90727 | 10.12734 |
| H6         | 21.03408 | 15.44981 | 10.76307 |
| Pt1        | 0.000000 | 0.000000 | 0.000000 |
| Pt2        | 4.161946 | 2.4029   | 0.000000 |
| Pt3        | 1.387315 | 2.4029   | 0.000000 |
| Pt4        | 0.000000 | 4.805801 | 0.000000 |
| Pt5        | 1.387315 | 7.208701 | 0.000000 |
| Pt6        | 4.161946 | 7.208701 | 0.000000 |
| Pt7        | 2.774631 | 0.000000 | 0.000000 |
| Pt8        | 2.774631 | 4.805801 | 0.000000 |
| Pt9        | 4.162022 | 8.97427  | 2.313934 |
| Pt10       | 1.388116 | 8.971524 | 2.313255 |
| Pt11       | 22.18905 | 1.755522 | 2.335803 |
| Pt12       | 22.19447 | 6.568776 | 2.314015 |
| Pt13       | 2.755685 | 1.763963 | 2.328835 |
| Pt14       | 1.374248 | 4.162365 | 2.310678 |
| Pt15       | 4.151305 | 4.164844 | 2.308381 |
| Pt16       | 2.772564 | 6.569035 | 2.30981  |
| Pt17       | 4.167109 | 5.965908 | 4.58711  |
| Pt18       | 1.390688 | 5.964856 | 4.5885   |
| Pt19       | 0.002728 | 8.367285 | 4.594021 |

|      |          |          |          |
|------|----------|----------|----------|
| Pt20 | 22.19537 | 3.569289 | 4.599423 |
| Pt21 | 1.350914 | 1.153101 | 4.643593 |
| Pt22 | 4.154184 | 1.162574 | 4.587803 |
| Pt23 | 2.771916 | 3.55735  | 4.588073 |
| Pt24 | 2.780052 | 8.3693   | 4.59197  |
| Pt25 | 0.063401 | 0.546923 | 6.956252 |
| Pt26 | 4.172434 | 2.939095 | 6.909304 |
| Pt27 | 1.409037 | 2.977317 | 6.921944 |
| Pt28 | 0.002872 | 5.360888 | 6.91355  |
| Pt29 | 1.3928   | 7.743841 | 6.904229 |
| Pt30 | 4.168393 | 7.731419 | 6.902132 |
| Pt31 | 2.820684 | 0.527368 | 6.917543 |
| Pt32 | 2.780459 | 5.342256 | 6.900061 |
| Pt33 | 5.549261 | 0.000000 | 0.000000 |
| Pt34 | 9.711207 | 2.4029   | 0.000000 |
| Pt35 | 6.936576 | 2.4029   | 0.000000 |
| Pt36 | 5.549261 | 4.805801 | 0.000000 |
| Pt37 | 6.936576 | 7.208701 | 0.000000 |
| Pt38 | 9.711207 | 7.208701 | 0.000000 |
| Pt39 | 8.323892 | 0.000000 | 0.000000 |
| Pt40 | 8.323892 | 4.805801 | 0.000000 |
| Pt41 | 9.711368 | 8.977673 | 2.311035 |
| Pt42 | 6.938248 | 8.976854 | 2.311217 |
| Pt43 | 5.531499 | 1.76506  | 2.31056  |
| Pt44 | 5.549498 | 6.572408 | 2.312648 |
| Pt45 | 8.317951 | 1.765807 | 2.308408 |
| Pt46 | 6.93014  | 4.167236 | 2.31089  |
| Pt47 | 9.709557 | 4.168991 | 2.312222 |
| Pt48 | 8.323995 | 6.57305  | 2.31246  |
| Pt49 | 9.71033  | 5.964113 | 4.591278 |
| Pt50 | 6.940796 | 5.965975 | 4.590505 |
| Pt51 | 5.555704 | 8.371643 | 4.591091 |
| Pt52 | 5.545184 | 3.563651 | 4.590494 |
| Pt53 | 6.933058 | 1.163853 | 4.583161 |
| Pt54 | 9.709733 | 1.160688 | 4.586383 |
| Pt55 | 8.320389 | 3.563459 | 4.588107 |
| Pt56 | 8.326547 | 8.372808 | 4.591376 |

| ARTICLE |          |          | Journal Name |
|---------|----------|----------|--------------|
| Pt57    | 5.553224 | 0.5293   | 6.90081      |
| Pt58    | 9.708624 | 2.925423 | 6.900749     |
| Pt59    | 6.939832 | 2.930989 | 6.901593     |
| Pt60    | 5.558651 | 5.336846 | 6.906607     |
| Pt61    | 6.939568 | 7.733641 | 6.905678     |
| Pt62    | 9.710497 | 7.733275 | 6.904356     |
| Pt63    | 8.318906 | 0.521763 | 6.893121     |
| Pt64    | 8.326542 | 5.329764 | 6.90735      |
| Pt65    | 11.09852 | 0.000000 | 0.000000     |
| Pt66    | 15.26047 | 2.4029   | 0.000000     |
| Pt67    | 12.48584 | 2.4029   | 0.000000     |
| Pt68    | 11.09852 | 4.805801 | 0.000000     |
| Pt69    | 12.48584 | 7.208701 | 0.000000     |
| Pt70    | 15.26047 | 7.208701 | 0.000000     |
| Pt71    | 13.87315 | 0.000000 | 0.000000     |
| Pt72    | 13.87315 | 4.805801 | 0.000000     |
| Pt73    | 15.26055 | 8.973791 | 2.313278     |
| Pt74    | 12.48469 | 8.976764 | 2.311667     |
| Pt75    | 11.10293 | 1.766797 | 2.30776      |
| Pt76    | 11.09785 | 6.573103 | 2.312961     |
| Pt77    | 13.89027 | 1.764806 | 2.308961     |
| Pt78    | 12.49039 | 4.167225 | 2.311177     |
| Pt79    | 15.26954 | 4.163391 | 2.311344     |
| Pt80    | 13.87097 | 6.571777 | 2.312297     |
| Pt81    | 15.2541  | 5.965972 | 4.588834     |
| Pt82    | 12.48104 | 5.967033 | 4.591828     |
| Pt83    | 11.09575 | 8.372077 | 4.591249     |
| Pt84    | 11.09676 | 3.564174 | 4.587765     |
| Pt85    | 12.48449 | 1.166041 | 4.581109     |
| Pt86    | 15.26166 | 1.165365 | 4.577064     |
| Pt87    | 13.87107 | 3.564867 | 4.592722     |
| Pt88    | 13.86689 | 8.371602 | 4.59123      |
| Pt89    | 11.10004 | 0.524814 | 6.895437     |
| Pt90    | 15.24019 | 2.946952 | 6.914974     |
| Pt91    | 12.47524 | 2.931709 | 6.903592     |
| Pt92    | 11.09137 | 5.330012 | 6.908519     |
| Pt93    | 12.47968 | 7.733878 | 6.90625      |



|       |          |          |          |
|-------|----------|----------|----------|
| Pt94  | 15.25245 | 7.736154 | 6.90215  |
| Pt95  | 13.85919 | 0.529603 | 6.898715 |
| Pt96  | 13.86023 | 5.340858 | 6.91032  |
| Pt97  | 16.64778 | 0.000000 | 0.000000 |
| Pt98  | 20.80973 | 2.4029   | 0.000000 |
| Pt99  | 18.0351  | 2.4029   | 0.000000 |
| Pt100 | 16.64778 | 4.805801 | 0.000000 |
| Pt101 | 18.0351  | 7.208701 | 0.000000 |
| Pt102 | 20.80973 | 7.208701 | 0.000000 |
| Pt103 | 19.42241 | 0.000000 | 0.000000 |
| Pt104 | 19.42241 | 4.805801 | 0.000000 |
| Pt105 | 20.81042 | 8.970634 | 2.313134 |
| Pt106 | 18.03564 | 8.972218 | 2.313718 |
| Pt107 | 16.67031 | 1.761951 | 2.32837  |
| Pt108 | 16.64635 | 6.569657 | 2.310398 |
| Pt109 | 19.42941 | 1.756788 | 2.340159 |
| Pt110 | 18.04259 | 4.16336  | 2.310968 |
| Pt111 | 20.80677 | 4.160504 | 2.310828 |
| Pt112 | 19.42134 | 6.56976  | 2.313805 |
| Pt113 | 20.80819 | 5.968682 | 4.593222 |
| Pt114 | 18.02849 | 5.967605 | 4.590248 |
| Pt115 | 16.64352 | 8.369921 | 4.592038 |
| Pt116 | 16.64555 | 3.557768 | 4.593678 |
| Pt117 | 18.07532 | 1.158217 | 4.65847  |
| Pt118 | 20.80115 | 1.164014 | 4.667205 |
| Pt119 | 19.41572 | 3.573827 | 4.600489 |
| Pt120 | 19.42078 | 8.368024 | 4.59479  |
| Pt121 | 16.58402 | 0.523092 | 6.877568 |
| Pt122 | 20.80636 | 2.994869 | 6.90489  |
| Pt123 | 18.00593 | 2.986883 | 6.930838 |
| Pt124 | 16.63599 | 5.346244 | 6.906122 |
| Pt125 | 18.02803 | 7.746914 | 6.906468 |
| Pt126 | 20.80875 | 7.747656 | 6.909739 |
| Pt127 | 19.35512 | 0.589255 | 7.02482  |
| Pt128 | 19.41532 | 5.366721 | 6.913847 |
| Pt129 | 0.000000 | 9.611602 | 0.000000 |
| Pt130 | 4.161946 | 12.0145  | 0.000000 |

| ARTICLE |          |          | Journal Name |
|---------|----------|----------|--------------|
| Pt131   | 1.387315 | 12.0145  | 0.000000     |
| Pt132   | 0.000000 | 14.4174  | 0.000000     |
| Pt133   | 1.387315 | 16.8203  | 0.000000     |
| Pt134   | 4.161946 | 16.8203  | 0.000000     |
| Pt135   | 2.774631 | 9.611602 | 0.000000     |
| Pt136   | 2.774631 | 14.4174  | 0.000000     |
| Pt137   | 4.157738 | 18.58526 | 2.311672     |
| Pt138   | 1.384359 | 18.59148 | 2.323269     |
| Pt139   | 0.002023 | 11.375   | 2.311184     |
| Pt140   | 0.002435 | 16.19192 | 2.302683     |
| Pt141   | 2.776089 | 11.3766  | 2.313186     |
| Pt142   | 1.387657 | 13.78239 | 2.311876     |
| Pt143   | 4.160396 | 13.78201 | 2.312136     |
| Pt144   | 2.774616 | 16.18784 | 2.312155     |
| Pt145   | 4.162397 | 15.57797 | 4.591822     |
| Pt146   | 1.38685  | 15.57357 | 4.586377     |
| Pt147   | 0.005978 | 17.97795 | 4.601684     |
| Pt148   | 0.000226 | 13.16532 | 4.589944     |
| Pt149   | 1.390083 | 10.76758 | 4.592582     |
| Pt150   | 4.16394  | 10.77371 | 4.592282     |
| Pt151   | 2.772444 | 13.17435 | 4.592133     |
| Pt152   | 2.780273 | 17.98393 | 4.597811     |
| Pt153   | 22.19528 | 10.13794 | 6.906517     |
| Pt154   | 4.162519 | 12.53895 | 6.906351     |
| Pt155   | 1.387535 | 12.53969 | 6.905873     |
| Pt156   | 0.004875 | 14.9236  | 6.901923     |
| Pt157   | 1.404785 | 17.32282 | 6.901235     |
| Pt158   | 4.168842 | 17.33754 | 6.9125       |
| Pt159   | 2.776443 | 10.13944 | 6.904381     |
| Pt160   | 2.782594 | 14.93534 | 6.907305     |
| Pt161   | 5.549261 | 9.611602 | 0.000000     |
| Pt162   | 9.711207 | 12.0145  | 0.000000     |
| Pt163   | 6.936576 | 12.0145  | 0.000000     |
| Pt164   | 5.549261 | 14.4174  | 0.000000     |
| Pt165   | 6.936576 | 16.8203  | 0.000000     |
| Pt166   | 9.711207 | 16.8203  | 0.000000     |
| Pt167   | 8.323892 | 9.611602 | 0.000000     |

|       |          |          |          |
|-------|----------|----------|----------|
| Pt168 | 8.323892 | 14.4174  | 0.000000 |
| Pt169 | 9.711894 | 18.58986 | 2.312829 |
| Pt170 | 6.932793 | 18.5872  | 2.311612 |
| Pt171 | 5.548634 | 11.37982 | 2.314038 |
| Pt172 | 5.549453 | 16.18542 | 2.313312 |
| Pt173 | 8.32324  | 11.38137 | 2.311385 |
| Pt174 | 6.934162 | 13.78184 | 2.313064 |
| Pt175 | 9.71099  | 13.78228 | 2.31357  |
| Pt176 | 8.324499 | 16.18576 | 2.313439 |
| Pt177 | 9.713562 | 15.57979 | 4.593592 |
| Pt178 | 6.93583  | 15.57917 | 4.591104 |
| Pt179 | 5.546824 | 17.98395 | 4.594409 |
| Pt180 | 5.546038 | 13.17871 | 4.594703 |
| Pt181 | 6.936301 | 10.77713 | 4.589831 |
| Pt182 | 9.709996 | 10.77698 | 4.590891 |
| Pt183 | 8.32181  | 13.17872 | 4.591047 |
| Pt184 | 8.322898 | 17.98122 | 4.587933 |
| Pt185 | 5.551984 | 10.13706 | 6.903328 |
| Pt186 | 9.710664 | 12.54563 | 6.901654 |
| Pt187 | 6.9386   | 12.54104 | 6.905031 |
| Pt188 | 5.552114 | 14.94413 | 6.908967 |
| Pt189 | 6.941855 | 17.3415  | 6.903055 |
| Pt190 | 9.71104  | 17.35    | 6.90276  |
| Pt191 | 8.322097 | 10.13874 | 6.902584 |
| Pt192 | 8.323053 | 14.94213 | 6.904445 |
| Pt193 | 11.09852 | 9.611602 | 0.000000 |
| Pt194 | 15.26047 | 12.0145  | 0.000000 |
| Pt195 | 12.48584 | 12.0145  | 0.000000 |
| Pt196 | 11.09852 | 14.4174  | 0.000000 |
| Pt197 | 12.48584 | 16.8203  | 0.000000 |
| Pt198 | 15.26047 | 16.8203  | 0.000000 |
| Pt199 | 13.87315 | 9.611602 | 0.000000 |
| Pt200 | 13.87315 | 14.4174  | 0.000000 |
| Pt201 | 15.2661  | 18.58539 | 2.307818 |
| Pt202 | 12.49038 | 18.5874  | 2.310091 |
| Pt203 | 11.09955 | 11.38138 | 2.311797 |
| Pt204 | 11.09791 | 16.18611 | 2.313455 |

| ARTICLE |          |          | Journal Name |
|---------|----------|----------|--------------|
| Pt205   | 13.87375 | 11.37912 | 2.314469     |
| Pt206   | 12.48742 | 13.78192 | 2.313154     |
| Pt207   | 15.26039 | 13.78085 | 2.311451     |
| Pt208   | 13.87275 | 16.18542 | 2.312933     |
| Pt209   | 15.26056 | 15.57562 | 4.592079     |
| Pt210   | 12.48887 | 15.57887 | 4.59113      |
| Pt211   | 11.10256 | 17.98288 | 4.589451     |
| Pt212   | 11.09966 | 13.17805 | 4.592016     |
| Pt213   | 12.48417 | 10.77704 | 4.590062     |
| Pt214   | 15.25784 | 10.77199 | 4.592575     |
| Pt215   | 13.87482 | 13.17765 | 4.595158     |
| Pt216   | 13.8764  | 17.98493 | 4.591597     |
| Pt217   | 11.09842 | 10.13887 | 6.902422     |
| Pt218   | 15.25962 | 12.5413  | 6.906656     |
| Pt219   | 12.48281 | 12.53955 | 6.90689      |
| Pt220   | 11.10161 | 14.94282 | 6.905611     |
| Pt221   | 12.48081 | 17.33952 | 6.902629     |
| Pt222   | 15.25258 | 17.33638 | 6.909587     |
| Pt223   | 13.86808 | 10.13978 | 6.902669     |
| Pt224   | 13.86974 | 14.94389 | 6.910862     |
| Pt225   | 16.64778 | 9.611602 | 0.000000     |
| Pt226   | 20.80973 | 12.0145  | 0.000000     |
| Pt227   | 18.0351  | 12.0145  | 0.000000     |
| Pt228   | 16.64778 | 14.4174  | 0.000000     |
| Pt229   | 18.0351  | 16.8203  | 0.000000     |
| Pt230   | 20.80973 | 16.8203  | 0.000000     |
| Pt231   | 19.42241 | 9.611602 | 0.000000     |
| Pt232   | 19.42241 | 14.4174  | 0.000000     |
| Pt233   | 20.81024 | 18.59223 | 2.332333     |
| Pt234   | 18.04127 | 18.59205 | 2.32373      |
| Pt235   | 16.64744 | 11.37527 | 2.312972     |
| Pt236   | 16.64635 | 16.18719 | 2.310182     |
| Pt237   | 19.42241 | 11.37526 | 2.31091      |
| Pt238   | 18.03388 | 13.78236 | 2.31233      |
| Pt239   | 20.80902 | 13.78466 | 2.313875     |
| Pt240   | 19.4195  | 16.19352 | 2.300896     |
| Pt241   | 20.80951 | 15.56401 | 4.565455     |

|       |          |          |          |
|-------|----------|----------|----------|
| Pt242 | 18.03632 | 15.57008 | 4.580924 |
| Pt243 | 16.64305 | 17.98133 | 4.586224 |
| Pt244 | 16.64762 | 13.1718  | 4.591038 |
| Pt245 | 18.03259 | 10.7679  | 4.592513 |
| Pt246 | 20.81006 | 10.76596 | 4.590476 |
| Pt247 | 19.42057 | 13.16448 | 4.59165  |
| Pt248 | 19.42046 | 17.98384 | 4.606065 |
| Pt249 | 16.64601 | 10.13934 | 6.90487  |
| Pt250 | 20.80871 | 12.53184 | 6.907655 |
| Pt251 | 18.03325 | 12.53955 | 6.907358 |
| Pt252 | 16.63984 | 14.93162 | 6.907082 |
| Pt253 | 18.02208 | 17.31918 | 6.874103 |
| Pt254 | 20.81174 | 17.28383 | 6.843224 |
| Pt255 | 19.42287 | 10.14114 | 6.908405 |
| Pt256 | 19.4188  | 14.92844 | 6.90236  |

**Table S7.** Atomic coordinates (cartesian; Å) of the Type C structure shown in Fig. 1(c)

| Atom label | X [Å]    | Y [Å]    | Z [Å]    |
|------------|----------|----------|----------|
| N1         | 0.264774 | 17.16751 | 9.429768 |
| N2         | 20.46854 | 18.36825 | 10.00604 |
| N3         | 20.46793 | 15.96375 | 9.999554 |
| N4         | 0.150757 | 0.266776 | 9.220708 |
| N5         | 18.55001 | 17.16521 | 10.45918 |
| N6         | 0.146047 | 14.84678 | 9.198079 |
| C1         | 21.73498 | 18.28754 | 9.619407 |
| C2         | 19.85757 | 17.16619 | 10.16165 |
| C3         | 21.73295 | 16.0468  | 9.610733 |
| H1         | 21.87463 | 1.096483 | 9.588414 |
| H2         | 18.04007 | 18.04118 | 10.39612 |
| H3         | 21.86448 | 14.0129  | 9.54969  |
| H4         | 1.167682 | 0.282885 | 9.349931 |
| H5         | 18.03993 | 16.2897  | 10.3913  |
| H6         | 1.16256  | 14.82293 | 9.330562 |
| Pt1        | 0.000000 | 0.000000 | 0.000000 |
| Pt2        | 4.161946 | 2.4029   | 0.000000 |
| Pt3        | 1.387315 | 2.4029   | 0.000000 |
| Pt4        | 0.000000 | 4.805801 | 0.000000 |
| Pt5        | 1.387315 | 7.208701 | 0.000000 |
| Pt6        | 4.161946 | 7.208701 | 0.000000 |
| Pt7        | 2.774631 | 0.000000 | 0.000000 |
| Pt8        | 2.774631 | 4.805801 | 0.000000 |
| Pt9        | 4.162362 | 8.925941 | 2.30672  |
| Pt10       | 1.38714  | 8.930217 | 2.307698 |
| Pt11       | 0.000639 | 1.713078 | 2.333679 |
| Pt12       | 22.19697 | 6.525274 | 2.308343 |
| Pt13       | 2.765736 | 1.716742 | 2.312826 |
| Pt14       | 1.382526 | 4.11906  | 2.31046  |
| Pt15       | 4.157458 | 4.118914 | 2.305764 |
| Pt16       | 2.773768 | 6.521764 | 2.306359 |
| Pt17       | 4.164013 | 5.857627 | 4.58039  |
| Pt18       | 1.387252 | 5.859387 | 4.585444 |
| Pt19       | 7.06E-06 | 8.259667 | 4.582059 |

|      |          |          |          |
|------|----------|----------|----------|
| Pt20 | 0.000837 | 3.462056 | 4.602527 |
| Pt21 | 1.383094 | 1.058232 | 4.62666  |
| Pt22 | 4.167848 | 1.054082 | 4.573949 |
| Pt23 | 2.776983 | 3.453952 | 4.581277 |
| Pt24 | 2.776018 | 8.260864 | 4.58031  |
| Pt25 | 0.001697 | 0.416628 | 6.965666 |
| Pt26 | 4.173169 | 2.776815 | 6.890442 |
| Pt27 | 1.403721 | 2.81648  | 6.908163 |
| Pt28 | 0.001537 | 5.195303 | 6.908011 |
| Pt29 | 1.390607 | 7.581211 | 6.891165 |
| Pt30 | 4.162643 | 7.579577 | 6.887099 |
| Pt31 | 2.819244 | 0.376217 | 6.895179 |
| Pt32 | 2.782406 | 5.18061  | 6.892483 |
| Pt33 | 5.549261 | 0.000000 | 0.000000 |
| Pt34 | 9.711207 | 2.4029   | 0.000000 |
| Pt35 | 6.936576 | 2.4029   | 0.000000 |
| Pt36 | 5.549261 | 4.805801 | 0.000000 |
| Pt37 | 6.936576 | 7.208701 | 0.000000 |
| Pt38 | 9.711207 | 7.208701 | 0.000000 |
| Pt39 | 8.323892 | 0.000000 | 0.000000 |
| Pt40 | 8.323892 | 4.805801 | 0.000000 |
| Pt41 | 9.711122 | 8.931976 | 2.30605  |
| Pt42 | 6.93529  | 8.929955 | 2.308117 |
| Pt43 | 5.543361 | 1.720273 | 2.305032 |
| Pt44 | 5.54977  | 6.525278 | 2.308142 |
| Pt45 | 8.320786 | 1.723388 | 2.303695 |
| Pt46 | 6.934762 | 4.126137 | 2.30655  |
| Pt47 | 9.710499 | 4.12733  | 2.306213 |
| Pt48 | 8.325931 | 6.530563 | 2.308498 |
| Pt49 | 9.712599 | 5.86095  | 4.584096 |
| Pt50 | 6.939814 | 5.862666 | 4.580801 |
| Pt51 | 5.550862 | 8.26405  | 4.584879 |
| Pt52 | 5.552885 | 3.459646 | 4.580317 |
| Pt53 | 6.939208 | 1.058181 | 4.57563  |
| Pt54 | 9.711268 | 1.053591 | 4.579861 |
| Pt55 | 8.327526 | 3.459851 | 4.58182  |
| Pt56 | 8.325459 | 8.265522 | 4.582422 |

## ARTICLE

## Journal Name

|      |          |          |          |
|------|----------|----------|----------|
| Pt57 | 5.565899 | 0.379205 | 6.89422  |
| Pt58 | 9.717608 | 2.768122 | 6.888025 |
| Pt59 | 6.949007 | 2.775062 | 6.890534 |
| Pt60 | 5.558302 | 5.179755 | 6.888785 |
| Pt61 | 6.946954 | 7.575049 | 6.893241 |
| Pt62 | 9.716962 | 7.577498 | 6.890637 |
| Pt63 | 8.326434 | 0.368842 | 6.887671 |
| Pt64 | 8.328065 | 5.173739 | 6.893352 |
| Pt65 | 11.09852 | 0.000000 | 0.000000 |
| Pt66 | 15.26047 | 2.4029   | 0.000000 |
| Pt67 | 12.48584 | 2.4029   | 0.000000 |
| Pt68 | 11.09852 | 4.805801 | 0.000000 |
| Pt69 | 12.48584 | 7.208701 | 0.000000 |
| Pt70 | 15.26047 | 7.208701 | 0.000000 |
| Pt71 | 13.87315 | 0.000000 | 0.000000 |
| Pt72 | 13.87315 | 4.805801 | 0.000000 |
| Pt73 | 15.26114 | 8.932163 | 2.307861 |
| Pt74 | 12.48584 | 8.929969 | 2.305672 |
| Pt75 | 11.09663 | 1.723623 | 2.306267 |
| Pt76 | 11.09939 | 6.526793 | 2.306546 |
| Pt77 | 13.87286 | 1.723642 | 2.303684 |
| Pt78 | 12.488   | 4.124699 | 2.306704 |
| Pt79 | 15.2646  | 4.125289 | 2.307042 |
| Pt80 | 13.87311 | 6.528433 | 2.305897 |
| Pt81 | 15.26027 | 5.861654 | 4.579247 |
| Pt82 | 12.48711 | 5.859147 | 4.582031 |
| Pt83 | 11.09859 | 8.264099 | 4.579019 |
| Pt84 | 11.09885 | 3.458072 | 4.576662 |
| Pt85 | 12.48372 | 1.052245 | 4.578231 |
| Pt86 | 15.2562  | 1.060692 | 4.576634 |
| Pt87 | 13.87177 | 3.457167 | 4.583406 |
| Pt88 | 13.87281 | 8.263206 | 4.581127 |
| Pt89 | 11.09982 | 0.362846 | 6.887972 |
| Pt90 | 15.25303 | 2.772751 | 6.893474 |
| Pt91 | 12.48169 | 2.769074 | 6.888055 |
| Pt92 | 11.10145 | 5.170955 | 6.889206 |
| Pt93 | 12.48244 | 7.577726 | 6.887807 |



|       |          |          |          |
|-------|----------|----------|----------|
| Pt94  | 15.25486 | 7.574131 | 6.892226 |
| Pt95  | 13.87122 | 0.369748 | 6.887206 |
| Pt96  | 13.87552 | 5.173536 | 6.89115  |
| Pt97  | 16.64778 | 0.000000 | 0.000000 |
| Pt98  | 20.80973 | 2.4029   | 0.000000 |
| Pt99  | 18.0351  | 2.4029   | 0.000000 |
| Pt100 | 16.64778 | 4.805801 | 0.000000 |
| Pt101 | 18.0351  | 7.208701 | 0.000000 |
| Pt102 | 20.80973 | 7.208701 | 0.000000 |
| Pt103 | 19.42241 | 0.000000 | 0.000000 |
| Pt104 | 19.42241 | 4.805801 | 0.000000 |
| Pt105 | 20.80995 | 8.927273 | 2.306784 |
| Pt106 | 18.03421 | 8.927048 | 2.307109 |
| Pt107 | 16.65498 | 1.724172 | 2.309481 |
| Pt108 | 16.64854 | 6.528665 | 2.309236 |
| Pt109 | 19.4336  | 1.715919 | 2.320883 |
| Pt110 | 18.04109 | 4.12024  | 2.307959 |
| Pt111 | 20.81518 | 4.117208 | 2.30956  |
| Pt112 | 19.4236  | 6.521117 | 2.305327 |
| Pt113 | 20.80876 | 5.85564  | 4.584131 |
| Pt114 | 18.03298 | 5.859827 | 4.58159  |
| Pt115 | 16.64645 | 8.268795 | 4.585032 |
| Pt116 | 16.64833 | 3.461663 | 4.585186 |
| Pt117 | 18.0293  | 1.060034 | 4.582908 |
| Pt118 | 20.82608 | 1.048233 | 4.634018 |
| Pt119 | 19.42319 | 3.45109  | 4.584832 |
| Pt120 | 19.42067 | 8.260183 | 4.579487 |
| Pt121 | 16.62912 | 0.377394 | 6.900903 |
| Pt122 | 20.79569 | 2.810434 | 6.91336  |
| Pt123 | 18.03045 | 2.776645 | 6.898554 |
| Pt124 | 16.64058 | 5.17714  | 6.892924 |
| Pt125 | 18.03694 | 7.579235 | 6.886604 |
| Pt126 | 20.80854 | 7.578192 | 6.888449 |
| Pt127 | 19.38274 | 0.370373 | 6.892235 |
| Pt128 | 19.41723 | 5.179259 | 6.891912 |
| Pt129 | 0.000000 | 9.611602 | 0.000000 |
| Pt130 | 4.161946 | 12.0145  | 0.000000 |

| ARTICLE |          |          | Journal Name |
|---------|----------|----------|--------------|
| Pt131   | 1.387315 | 12.0145  | 0.000000     |
| Pt132   | 0.000000 | 14.4174  | 0.000000     |
| Pt133   | 1.387315 | 16.8203  | 0.000000     |
| Pt134   | 4.161946 | 16.8203  | 0.000000     |
| Pt135   | 2.774631 | 9.611602 | 0.000000     |
| Pt136   | 2.774631 | 14.4174  | 0.000000     |
| Pt137   | 4.154818 | 18.53664 | 2.314451     |
| Pt138   | 1.387245 | 18.54343 | 2.319418     |
| Pt139   | 1.95E-05 | 11.33997 | 2.307752     |
| Pt140   | 0.00457  | 16.14264 | 2.31174      |
| Pt141   | 2.774148 | 11.33283 | 2.308393     |
| Pt142   | 1.383649 | 13.74417 | 2.324727     |
| Pt143   | 4.157694 | 13.73316 | 2.305212     |
| Pt144   | 2.768815 | 16.14083 | 2.311392     |
| Pt145   | 4.163018 | 15.4749  | 4.577094     |
| Pt146   | 1.378797 | 15.46769 | 4.610228     |
| Pt147   | 0.008867 | 17.88264 | 4.590608     |
| Pt148   | 0.005151 | 13.05752 | 4.619061     |
| Pt149   | 1.388218 | 10.66075 | 4.578549     |
| Pt150   | 4.164057 | 10.66448 | 4.585494     |
| Pt151   | 2.779054 | 13.06549 | 4.587671     |
| Pt152   | 2.776783 | 17.86985 | 4.596386     |
| Pt153   | 22.19639 | 9.976097 | 6.892648     |
| Pt154   | 4.174832 | 12.3807  | 6.900637     |
| Pt155   | 1.410383 | 12.35616 | 6.892859     |
| Pt156   | 22.19658 | 14.77824 | 6.94551      |
| Pt157   | 1.423856 | 17.20582 | 6.895154     |
| Pt158   | 4.189349 | 17.18992 | 6.909925     |
| Pt159   | 2.783337 | 9.975881 | 6.893096     |
| Pt160   | 2.82328  | 14.77563 | 6.887938     |
| Pt161   | 5.549261 | 9.611602 | 0.000000     |
| Pt162   | 9.711207 | 12.0145  | 0.000000     |
| Pt163   | 6.936576 | 12.0145  | 0.000000     |
| Pt164   | 5.549261 | 14.4174  | 0.000000     |
| Pt165   | 6.936576 | 16.8203  | 0.000000     |
| Pt166   | 9.711207 | 16.8203  | 0.000000     |
| Pt167   | 8.323892 | 9.611602 | 0.000000     |

|       |          |          |          |
|-------|----------|----------|----------|
| Pt168 | 8.323892 | 14.4174  | 0.000000 |
| Pt169 | 9.708517 | 18.54371 | 2.307898 |
| Pt170 | 6.930618 | 18.54064 | 2.306563 |
| Pt171 | 5.547201 | 11.33222 | 2.307909 |
| Pt172 | 5.541804 | 16.13845 | 2.306287 |
| Pt173 | 8.321723 | 11.33699 | 2.306004 |
| Pt174 | 6.931096 | 13.73634 | 2.305032 |
| Pt175 | 9.709864 | 13.73796 | 2.306661 |
| Pt176 | 8.321012 | 16.14008 | 2.306041 |
| Pt177 | 9.71034  | 15.47433 | 4.58249  |
| Pt178 | 6.936226 | 15.47598 | 4.576628 |
| Pt179 | 5.550789 | 17.87607 | 4.58675  |
| Pt180 | 5.547744 | 13.07251 | 4.583984 |
| Pt181 | 6.937464 | 10.66842 | 4.579245 |
| Pt182 | 9.709425 | 10.66956 | 4.579162 |
| Pt183 | 8.320487 | 13.07349 | 4.579653 |
| Pt184 | 8.323294 | 17.87523 | 4.58517  |
| Pt185 | 5.561821 | 9.978347 | 6.892483 |
| Pt186 | 9.716525 | 12.38555 | 6.883941 |
| Pt187 | 6.946264 | 12.37965 | 6.891581 |
| Pt188 | 5.567183 | 14.78528 | 6.89463  |
| Pt189 | 6.946639 | 17.18847 | 6.893815 |
| Pt190 | 9.715883 | 17.18898 | 6.89659  |
| Pt191 | 8.325854 | 9.97959  | 6.889642 |
| Pt192 | 8.324296 | 14.78515 | 6.887393 |
| Pt193 | 11.09852 | 9.611602 | 0.000000 |
| Pt194 | 15.26047 | 12.0145  | 0.000000 |
| Pt195 | 12.48584 | 12.0145  | 0.000000 |
| Pt196 | 11.09852 | 14.4174  | 0.000000 |
| Pt197 | 12.48584 | 16.8203  | 0.000000 |
| Pt198 | 15.26047 | 16.8203  | 0.000000 |
| Pt199 | 13.87315 | 9.611602 | 0.000000 |
| Pt200 | 13.87315 | 14.4174  | 0.000000 |
| Pt201 | 15.25717 | 18.54307 | 2.302893 |
| Pt202 | 12.48483 | 18.54103 | 2.306642 |
| Pt203 | 11.09747 | 11.33455 | 2.305223 |
| Pt204 | 11.09872 | 16.1379  | 2.308414 |

| ARTICLE |          |          | Journal Name |
|---------|----------|----------|--------------|
| Pt205   | 13.87257 | 11.33587 | 2.305996     |
| Pt206   | 12.48987 | 13.73666 | 2.307353     |
| Pt207   | 15.26583 | 13.7363  | 2.305934     |
| Pt208   | 13.87767 | 16.13899 | 2.305904     |
| Pt209   | 15.26246 | 15.47736 | 4.579486     |
| Pt210   | 12.48721 | 15.47112 | 4.578981     |
| Pt211   | 11.09713 | 17.87318 | 4.579156     |
| Pt212   | 11.09955 | 13.07113 | 4.576006     |
| Pt213   | 12.48648 | 10.66819 | 4.578027     |
| Pt214   | 15.26028 | 10.66952 | 4.579358     |
| Pt215   | 13.87877 | 13.07171 | 4.583187     |
| Pt216   | 13.87101 | 17.87489 | 4.58525      |
| Pt217   | 11.10062 | 9.981718 | 6.886195     |
| Pt218   | 15.25493 | 12.37847 | 6.893019     |
| Pt219   | 12.48169 | 12.38452 | 6.886046     |
| Pt220   | 11.10038 | 14.78664 | 6.887017     |
| Pt221   | 12.48046 | 17.18594 | 6.890299     |
| Pt222   | 15.2522  | 17.18884 | 6.898199     |
| Pt223   | 13.87486 | 9.979918 | 6.88721      |
| Pt224   | 13.87258 | 14.78602 | 6.889026     |
| Pt225   | 16.64778 | 9.611602 | 0.000000     |
| Pt226   | 20.80973 | 12.0145  | 0.000000     |
| Pt227   | 18.0351  | 12.0145  | 0.000000     |
| Pt228   | 16.64778 | 14.4174  | 0.000000     |
| Pt229   | 18.0351  | 16.8203  | 0.000000     |
| Pt230   | 20.80973 | 16.8203  | 0.000000     |
| Pt231   | 19.42241 | 9.611602 | 0.000000     |
| Pt232   | 19.42241 | 14.4174  | 0.000000     |
| Pt233   | 20.81975 | 18.5444  | 2.306978     |
| Pt234   | 18.03299 | 18.54248 | 2.299481     |
| Pt235   | 16.6495  | 11.33382 | 2.310614     |
| Pt236   | 16.65729 | 16.13968 | 2.30785      |
| Pt237   | 19.42253 | 11.33016 | 2.307285     |
| Pt238   | 18.0396  | 13.73194 | 2.306581     |
| Pt239   | 20.81564 | 13.73989 | 2.326878     |
| Pt240   | 19.42932 | 16.13799 | 2.302093     |
| Pt241   | 20.82327 | 15.44462 | 4.590625     |

|       |          |          |          |
|-------|----------|----------|----------|
| Pt242 | 18.03547 | 15.47385 | 4.577579 |
| Pt243 | 16.63438 | 17.88402 | 4.578395 |
| Pt244 | 16.64941 | 13.07477 | 4.586172 |
| Pt245 | 18.03409 | 10.66701 | 4.586886 |
| Pt246 | 20.81142 | 10.6584  | 4.577912 |
| Pt247 | 19.4188  | 13.05887 | 4.590439 |
| Pt248 | 19.39359 | 17.88245 | 4.537146 |
| Pt249 | 16.64022 | 9.979562 | 6.89319  |
| Pt250 | 20.79174 | 12.35738 | 6.896753 |
| Pt251 | 18.025   | 12.38602 | 6.903864 |
| Pt252 | 16.62738 | 14.785   | 6.902508 |
| Pt253 | 18.00086 | 17.19643 | 6.894424 |
| Pt254 | 20.73752 | 17.18657 | 6.754882 |
| Pt255 | 19.41745 | 9.977552 | 6.891182 |
| Pt256 | 19.37419 | 14.77704 | 6.889374 |

**Table S8.** Atomic coordinates (cartesian; Å) of the Type D structure shown in Fig. 1(d)

| Atom label | X [Å]    | Y [Å]    | Z [Å]    |
|------------|----------|----------|----------|
| N1         | 1.387152 | 2.132538 | 10.1675  |
| N2         | 2.585399 | 0.105684 | 9.65862  |
| N3         | 0.189218 | 0.105274 | 9.660005 |
| N4         | 3.694445 | 2.0765   | 10.12756 |
| N5         | 1.387288 | 17.38802 | 9.141545 |
| N6         | 21.27703 | 2.076106 | 10.12874 |
| C1         | 2.52117  | 1.435021 | 9.986852 |
| C2         | 1.387208 | 18.76283 | 9.535515 |
| C3         | 0.253438 | 1.434755 | 9.987659 |
| H1         | 4.542165 | 1.613431 | 9.809989 |
| H2         | 2.238977 | 16.90933 | 9.45289  |
| H3         | 20.42928 | 1.612778 | 9.811483 |
| H4         | 3.683452 | 3.089436 | 10.19724 |
| H5         | 0.535458 | 16.90942 | 9.452841 |
| H6         | 21.28792 | 3.089061 | 10.19779 |
| Pt1        | 0.000000 | 0000000  | 0000000  |
| Pt2        | 4.161946 | 2.4029   | 0000000  |
| Pt3        | 1.387315 | 2.4029   | 0000000  |
| Pt4        | 0000000  | 4.805801 | 0000000  |
| Pt5        | 1.387315 | 7.208701 | 0000000  |
| Pt6        | 4.161946 | 7.208701 | 0000000  |
| Pt7        | 2.774631 | 0000000  | 0000000  |
| Pt8        | 2.774631 | 4.805801 | 0000000  |
| Pt9        | 4.161234 | 8.925972 | 2.30695  |
| Pt10       | 1.387371 | 8.929603 | 2.30664  |
| Pt11       | 0.004817 | 1.712391 | 2.306418 |
| Pt12       | 0.001102 | 6.522678 | 2.308123 |
| Pt13       | 2.769631 | 1.712513 | 2.306357 |
| Pt14       | 1.387194 | 4.119707 | 2.309003 |
| Pt15       | 4.160071 | 4.117792 | 2.306455 |
| Pt16       | 2.773519 | 6.522721 | 2.3082   |
| Pt17       | 4.164382 | 5.848488 | 4.582471 |
| Pt18       | 1.387231 | 5.84921  | 4.587595 |
| Pt19       | 22.19674 | 8.250624 | 4.581927 |

|      |          |          |          |
|------|----------|----------|----------|
| Pt20 | 22.19287 | 3.449544 | 4.581096 |
| Pt21 | 1.387302 | 1.048456 | 4.599819 |
| Pt22 | 4.167883 | 1.044846 | 4.569445 |
| Pt23 | 2.77865  | 3.449464 | 4.581074 |
| Pt24 | 2.774736 | 8.250636 | 4.581939 |
| Pt25 | 22.13939 | 0.378975 | 6.867084 |
| Pt26 | 4.175052 | 2.768554 | 6.890436 |
| Pt27 | 1.387117 | 2.778197 | 6.87876  |
| Pt28 | 22.19393 | 5.164476 | 6.898268 |
| Pt29 | 1.387214 | 7.559949 | 6.895218 |
| Pt30 | 4.16249  | 7.55498  | 6.888801 |
| Pt31 | 2.832148 | 0.37915  | 6.867285 |
| Pt32 | 2.777409 | 5.164334 | 6.898357 |
| Pt33 | 5.549261 | 0000000  | 0000000  |
| Pt34 | 9.711207 | 2.4029   | 0000000  |
| Pt35 | 6.936576 | 2.4029   | 0000000  |
| Pt36 | 5.549261 | 4.805801 | 0000000  |
| Pt37 | 6.936576 | 7.208701 | 0000000  |
| Pt38 | 9.711207 | 7.208701 | 0000000  |
| Pt39 | 8.323892 | 0000000  | 0000000  |
| Pt40 | 8.323892 | 4.805801 | 0000000  |
| Pt41 | 9.711    | 8.927248 | 2.307553 |
| Pt42 | 6.936399 | 8.926471 | 2.307876 |
| Pt43 | 5.545816 | 1.715654 | 2.306985 |
| Pt44 | 5.548565 | 6.523013 | 2.30816  |
| Pt45 | 8.32223  | 1.717985 | 2.306399 |
| Pt46 | 6.937567 | 4.12076  | 2.306483 |
| Pt47 | 9.712021 | 4.121741 | 2.305831 |
| Pt48 | 8.323984 | 6.524537 | 2.306706 |
| Pt49 | 9.71359  | 5.852139 | 4.581727 |
| Pt50 | 6.939106 | 5.851971 | 4.582031 |
| Pt51 | 5.549661 | 8.253566 | 4.582534 |
| Pt52 | 5.556638 | 3.447189 | 4.579498 |
| Pt53 | 6.940695 | 1.04997  | 4.580739 |
| Pt54 | 9.713216 | 1.045787 | 4.583485 |
| Pt55 | 8.328145 | 3.449141 | 4.582777 |
| Pt56 | 8.324461 | 8.255353 | 4.580523 |

## ARTICLE

## Journal Name

|      |          |          |          |
|------|----------|----------|----------|
| Pt57 | 5.57798  | 0.353464 | 6.896816 |
| Pt58 | 9.71698  | 2.750932 | 6.891317 |
| Pt59 | 6.945727 | 2.757737 | 6.89847  |
| Pt60 | 5.551164 | 5.153795 | 6.891052 |
| Pt61 | 6.940613 | 7.555347 | 6.886537 |
| Pt62 | 9.710383 | 7.554721 | 6.889314 |
| Pt63 | 8.329113 | 0.35183  | 6.891142 |
| Pt64 | 8.329279 | 5.153431 | 6.889442 |
| Pt65 | 11.09852 | 0000000  | 0000000  |
| Pt66 | 15.26047 | 2.4029   | 0000000  |
| Pt67 | 12.48584 | 2.4029   | 0000000  |
| Pt68 | 11.09852 | 4.805801 | 0000000  |
| Pt69 | 12.48584 | 7.208701 | 0000000  |
| Pt70 | 15.26047 | 7.208701 | 0000000  |
| Pt71 | 13.87315 | 0000000  | 0000000  |
| Pt72 | 13.87315 | 4.805801 | 0000000  |
| Pt73 | 15.2605  | 8.927149 | 2.307523 |
| Pt74 | 12.48587 | 8.92603  | 2.305335 |
| Pt75 | 11.09796 | 1.717379 | 2.306595 |
| Pt76 | 11.09883 | 6.523567 | 2.306184 |
| Pt77 | 13.87375 | 1.717458 | 2.306768 |
| Pt78 | 12.48577 | 4.121087 | 2.306809 |
| Pt79 | 15.2597  | 4.121772 | 2.305918 |
| Pt80 | 13.87291 | 6.523559 | 2.306235 |
| Pt81 | 15.25799 | 5.852313 | 4.581672 |
| Pt82 | 12.48592 | 5.850933 | 4.578773 |
| Pt83 | 11.09806 | 8.255693 | 4.58173  |
| Pt84 | 11.0995  | 3.446541 | 4.581316 |
| Pt85 | 12.48591 | 1.044409 | 4.577336 |
| Pt86 | 15.25853 | 1.045762 | 4.583609 |
| Pt87 | 13.87213 | 3.446646 | 4.581462 |
| Pt88 | 13.87347 | 8.255672 | 4.581754 |
| Pt89 | 11.10049 | 0.343994 | 6.886531 |
| Pt90 | 15.25455 | 2.751073 | 6.89142  |
| Pt91 | 12.48593 | 2.744182 | 6.890718 |
| Pt92 | 11.10184 | 5.151156 | 6.887121 |
| Pt93 | 12.48579 | 7.553183 | 6.885622 |



|       |          |          |          |
|-------|----------|----------|----------|
| Pt94  | 15.26126 | 7.554876 | 6.889179 |
| Pt95  | 13.87139 | 0.343856 | 6.886709 |
| Pt96  | 13.86972 | 5.15131  | 6.88713  |
| Pt97  | 16.64778 | 0000000  | 0000000  |
| Pt98  | 20.80973 | 2.4029   | 0000000  |
| Pt99  | 18.0351  | 2.4029   | 0000000  |
| Pt100 | 16.64778 | 4.805801 | 0000000  |
| Pt101 | 18.0351  | 7.208701 | 0000000  |
| Pt102 | 20.80973 | 7.208701 | 0000000  |
| Pt103 | 19.42241 | 0000000  | 0000000  |
| Pt104 | 19.42241 | 4.805801 | 0000000  |
| Pt105 | 20.81043 | 8.926023 | 2.306773 |
| Pt106 | 18.03533 | 8.926572 | 2.30768  |
| Pt107 | 16.64938 | 1.718096 | 2.306437 |
| Pt108 | 16.64767 | 6.524517 | 2.306727 |
| Pt109 | 19.42577 | 1.715657 | 2.307055 |
| Pt110 | 18.03428 | 4.1209   | 2.306457 |
| Pt111 | 20.81165 | 4.117718 | 2.306407 |
| Pt112 | 19.42312 | 6.523088 | 2.308128 |
| Pt113 | 20.80699 | 5.848379 | 4.58234  |
| Pt114 | 18.03244 | 5.852008 | 4.582023 |
| Pt115 | 16.64706 | 8.255498 | 4.580344 |
| Pt116 | 16.64358 | 3.449213 | 4.582974 |
| Pt117 | 18.03098 | 1.050097 | 4.580872 |
| Pt118 | 20.80353 | 1.044822 | 4.569348 |
| Pt119 | 19.41491 | 3.447161 | 4.579432 |
| Pt120 | 19.42175 | 8.253549 | 4.582322 |
| Pt121 | 16.64262 | 0.351795 | 6.89139  |
| Pt122 | 20.79662 | 2.76835  | 6.890587 |
| Pt123 | 18.02591 | 2.757746 | 6.898626 |
| Pt124 | 16.64236 | 5.153528 | 6.889585 |
| Pt125 | 18.03083 | 7.555419 | 6.886584 |
| Pt126 | 20.80884 | 7.555154 | 6.888801 |
| Pt127 | 19.39375 | 0.353309 | 6.896838 |
| Pt128 | 19.42021 | 5.153889 | 6.891143 |
| Pt129 | 0000000  | 9.611602 | 0000000  |
| Pt130 | 4.161946 | 12.0145  | 0000000  |

| ARTICLE |          |          | Journal Name |
|---------|----------|----------|--------------|
| Pt131   | 1.387315 | 12.0145  | 0000000      |
| Pt132   | 0000000  | 14.4174  | 0000000      |
| Pt133   | 1.387315 | 16.8203  | 0000000      |
| Pt134   | 4.161946 | 16.8203  | 0000000      |
| Pt135   | 2.774631 | 9.611602 | 0000000      |
| Pt136   | 2.774631 | 14.4174  | 0000000      |
| Pt137   | 4.155028 | 18.5356  | 2.307292     |
| Pt138   | 1.387263 | 18.53549 | 2.326725     |
| Pt139   | 4.86E-05 | 11.33669 | 2.30684      |
| Pt140   | 0.005416 | 16.14397 | 2.328798     |
| Pt141   | 2.774579 | 11.33667 | 2.306900     |
| Pt142   | 1.387224 | 13.74681 | 2.308798     |
| Pt143   | 4.161132 | 13.73832 | 2.308362     |
| Pt144   | 2.769058 | 16.14408 | 2.328927     |
| Pt145   | 4.166056 | 15.46104 | 4.589931     |
| Pt146   | 1.387348 | 15.47081 | 4.629615     |
| Pt147   | 0.007721 | 17.86089 | 4.618233     |
| Pt148   | 0.001688 | 13.06181 | 4.577646     |
| Pt149   | 1.387319 | 10.65513 | 4.57977      |
| Pt150   | 4.160058 | 10.65613 | 4.578872     |
| Pt151   | 2.772855 | 13.06173 | 4.577651     |
| Pt152   | 2.766871 | 17.86095 | 4.618443     |
| Pt153   | 0.000156 | 9.955987 | 6.886784     |
| Pt154   | 4.16633  | 12.35782 | 6.888344     |
| Pt155   | 1.387177 | 12.3557  | 6.887122     |
| Pt156   | 22.18208 | 14.74438 | 6.896811     |
| Pt157   | 1.387231 | 17.18167 | 6.963776     |
| Pt158   | 4.211547 | 17.16186 | 6.882558     |
| Pt159   | 2.774215 | 9.955879 | 6.886855     |
| Pt160   | 2.78975  | 14.74444 | 6.897028     |
| Pt161   | 5.549261 | 9.611602 | 0000000      |
| Pt162   | 9.711207 | 12.0145  | 0000000      |
| Pt163   | 6.936576 | 12.0145  | 0000000      |
| Pt164   | 5.549261 | 14.4174  | 0000000      |
| Pt165   | 6.936576 | 16.8203  | 0000000      |
| Pt166   | 9.711207 | 16.8203  | 0000000      |
| Pt167   | 8.323892 | 9.611602 | 0000000      |

|       |          |          |          |
|-------|----------|----------|----------|
| Pt168 | 8.323892 | 14.4174  | 0000000  |
| Pt169 | 9.707172 | 18.53834 | 2.305033 |
| Pt170 | 6.929861 | 18.5373  | 2.305518 |
| Pt171 | 5.54955  | 11.3292  | 2.306493 |
| Pt172 | 5.545371 | 16.13326 | 2.305769 |
| Pt173 | 8.322702 | 11.32959 | 2.307369 |
| Pt174 | 6.935345 | 13.73308 | 2.307874 |
| Pt175 | 9.710958 | 13.7325  | 2.306104 |
| Pt176 | 8.321593 | 16.13471 | 2.305179 |
| Pt177 | 9.707822 | 15.46356 | 4.580679 |
| Pt178 | 6.936206 | 15.46557 | 4.582164 |
| Pt179 | 5.55078  | 17.86933 | 4.574761 |
| Pt180 | 5.548894 | 13.0608  | 4.584276 |
| Pt181 | 6.934776 | 10.65873 | 4.583741 |
| Pt182 | 9.70929  | 10.65729 | 4.5826   |
| Pt183 | 8.323216 | 13.06012 | 4.58124  |
| Pt184 | 8.323374 | 17.87116 | 4.576431 |
| Pt185 | 5.546302 | 9.959226 | 6.88614  |
| Pt186 | 9.711479 | 12.35944 | 6.888677 |
| Pt187 | 6.94131  | 12.35767 | 6.89114  |
| Pt188 | 5.559623 | 14.76098 | 6.898967 |
| Pt189 | 6.954469 | 17.16643 | 6.889983 |
| Pt190 | 9.710928 | 17.16539 | 6.88325  |
| Pt191 | 8.326663 | 9.955768 | 6.8906   |
| Pt192 | 8.330168 | 14.75835 | 6.888996 |
| Pt193 | 11.09852 | 9.611602 | 0000000  |
| Pt194 | 15.26047 | 12.0145  | 0000000  |
| Pt195 | 12.48584 | 12.0145  | 0000000  |
| Pt196 | 11.09852 | 14.4174  | 0000000  |
| Pt197 | 12.48584 | 16.8203  | 0000000  |
| Pt198 | 15.26047 | 16.8203  | 0000000  |
| Pt199 | 13.87315 | 9.611602 | 0000000  |
| Pt200 | 13.87315 | 14.4174  | 0000000  |
| Pt201 | 15.26437 | 18.53831 | 2.305049 |
| Pt202 | 12.48575 | 18.53729 | 2.304622 |
| Pt203 | 11.09834 | 11.32957 | 2.307406 |
| Pt204 | 11.09711 | 16.13546 | 2.306158 |

| ARTICLE |          |          | Journal Name |
|---------|----------|----------|--------------|
| Pt205   | 13.87325 | 11.32956 | 2.307412     |
| Pt206   | 12.48586 | 13.73238 | 2.30764      |
| Pt207   | 15.26079 | 13.73248 | 2.306043     |
| Pt208   | 13.87461 | 16.13549 | 2.306107     |
| Pt209   | 15.26385 | 15.46351 | 4.580674     |
| Pt210   | 12.48592 | 15.46096 | 4.57575      |
| Pt211   | 11.09772 | 17.8648  | 4.5765       |
| Pt212   | 11.09672 | 13.05939 | 4.580549     |
| Pt213   | 12.48573 | 10.65775 | 4.580877     |
| Pt214   | 15.26227 | 10.65741 | 4.582507     |
| Pt215   | 13.87499 | 13.05937 | 4.580657     |
| Pt216   | 13.87398 | 17.86487 | 4.576482     |
| Pt217   | 11.10034 | 9.958275 | 6.887569     |
| Pt218   | 15.2601  | 12.35931 | 6.888703     |
| Pt219   | 12.48575 | 12.36142 | 6.888036     |
| Pt220   | 11.1022  | 14.76343 | 6.884462     |
| Pt221   | 12.48598 | 17.16616 | 6.879366     |
| Pt222   | 15.26086 | 17.16526 | 6.883265     |
| Pt223   | 13.87142 | 9.958226 | 6.887546     |
| Pt224   | 13.86945 | 14.76329 | 6.884538     |
| Pt225   | 16.64778 | 9.611602 | 0000000      |
| Pt226   | 20.80973 | 12.0145  | 0000000      |
| Pt227   | 18.0351  | 12.0145  | 0000000      |
| Pt228   | 16.64778 | 14.4174  | 0000000      |
| Pt229   | 18.0351  | 16.8203  | 0000000      |
| Pt230   | 20.80973 | 16.8203  | 0000000      |
| Pt231   | 19.42241 | 9.611602 | 0000000      |
| Pt232   | 19.42241 | 14.4174  | 0000000      |
| Pt233   | 20.81649 | 18.53553 | 2.307261     |
| Pt234   | 18.04173 | 18.5374  | 2.305479     |
| Pt235   | 16.64896 | 11.32953 | 2.307394     |
| Pt236   | 16.65005 | 16.13471 | 2.305091     |
| Pt237   | 19.42204 | 11.32912 | 2.30654      |
| Pt238   | 18.03633 | 13.73297 | 2.307886     |
| Pt239   | 20.81039 | 13.73823 | 2.308331     |
| Pt240   | 19.42616 | 16.13314 | 2.305567     |
| Pt241   | 20.80536 | 15.4609  | 4.589828     |

|       |          |          |          |
|-------|----------|----------|----------|
| Pt242 | 18.03527 | 15.46563 | 4.582078 |
| Pt243 | 16.64832 | 17.87118 | 4.576441 |
| Pt244 | 16.64851 | 13.06015 | 4.581186 |
| Pt245 | 18.03682 | 10.65882 | 4.583738 |
| Pt246 | 20.81153 | 10.65602 | 4.578671 |
| Pt247 | 19.42267 | 13.06088 | 4.584297 |
| Pt248 | 19.4207  | 17.86933 | 4.574764 |
| Pt249 | 16.6451  | 9.955704 | 6.890567 |
| Pt250 | 20.80522 | 12.35775 | 6.888311 |
| Pt251 | 18.03036 | 12.35751 | 6.891225 |
| Pt252 | 16.64149 | 14.75804 | 6.889051 |
| Pt253 | 18.01706 | 17.16625 | 6.889827 |
| Pt254 | 20.76001 | 17.16176 | 6.882392 |
| Pt255 | 19.42521 | 9.959217 | 6.885968 |
| Pt256 | 19.41207 | 14.76089 | 6.898972 |

**Table S9.** Atomic coordinates (cartesian; Å) of the diamino-triazine/Pt(111) structure shown in Fig. 8(a)

| Atom label | X [Å]    | Y [Å]    | Z [Å]    |
|------------|----------|----------|----------|
| N1         | 21.10721 | 17.92102 | 10.2909  |
| N2         | 19.59279 | 0.063238 | 9.060017 |
| N3         | 18.74617 | 17.5014  | 10.3907  |
| N4         | 21.90244 | 0.558288 | 9.131257 |
| N5         | 20.27489 | 15.92354 | 11.10034 |
| C1         | 20.82659 | 18.95665 | 9.523402 |
| C2         | 18.57525 | 18.55571 | 9.619104 |
| C3         | 20.03975 | 17.12943 | 10.57588 |
| H1         | 21.69951 | 1.56273  | 9.22833  |
| H2         | 19.4934  | 15.29369 | 11.25054 |
| H3         | 0.567793 | 0.285587 | 9.613045 |
| H4         | 21.22809 | 15.58135 | 11.16131 |
| H5         | 17.56186 | 18.90842 | 9.410263 |
| Pt1        | 0.000000 | 0.000000 | 0.000000 |
| Pt2        | 4.161946 | 2.4029   | 0.000000 |
| Pt3        | 1.387315 | 2.4029   | 0.000000 |
| Pt4        | 0.000000 | 4.805801 | 0.000000 |
| Pt5        | 1.387315 | 7.208701 | 0.000000 |
| Pt6        | 4.161946 | 7.208701 | 0.000000 |
| Pt7        | 2.774631 | 0.000000 | 0.000000 |
| Pt8        | 2.774631 | 4.805801 | 0.000000 |
| Pt9        | 4.161745 | 8.973887 | 2.31401  |
| Pt10       | 1.38751  | 8.971317 | 2.313741 |
| Pt11       | 22.18648 | 1.755677 | 2.332442 |
| Pt12       | 22.19483 | 6.568706 | 2.313713 |
| Pt13       | 2.754805 | 1.763134 | 2.329753 |
| Pt14       | 1.374151 | 4.162116 | 2.310816 |
| Pt15       | 4.151497 | 4.162969 | 2.308153 |
| Pt16       | 2.772874 | 6.568735 | 2.309588 |
| Pt17       | 4.166276 | 5.963641 | 4.586689 |
| Pt18       | 1.390155 | 5.963971 | 4.588181 |
| Pt19       | 0.00054  | 8.365988 | 4.593786 |
| Pt20       | 22.19602 | 3.566896 | 4.598684 |
| Pt21       | 1.352033 | 1.151558 | 4.639212 |

|      |          |          |          |
|------|----------|----------|----------|
| Pt22 | 4.154328 | 1.16125  | 4.587208 |
| Pt23 | 2.772138 | 3.556578 | 4.588457 |
| Pt24 | 2.778833 | 8.367981 | 4.592364 |
| Pt25 | 0.068239 | 0.54637  | 6.949937 |
| Pt26 | 4.172776 | 2.93548  | 6.908198 |
| Pt27 | 1.409109 | 2.972679 | 6.92277  |
| Pt28 | 0.002254 | 5.356677 | 6.913341 |
| Pt29 | 1.389933 | 7.738686 | 6.902309 |
| Pt30 | 4.166634 | 7.728344 | 6.902941 |
| Pt31 | 2.821012 | 0.52452  | 6.919013 |
| Pt32 | 2.780303 | 5.33736  | 6.900341 |
| Pt33 | 5.549261 | 0.000000 | 0.000000 |
| Pt34 | 9.711207 | 2.4029   | 0.000000 |
| Pt35 | 6.936576 | 2.4029   | 0.000000 |
| Pt36 | 5.549261 | 4.805801 | 0.000000 |
| Pt37 | 6.936576 | 7.208701 | 0.000000 |
| Pt38 | 9.711207 | 7.208701 | 0.000000 |
| Pt39 | 8.323892 | 0.000000 | 0.000000 |
| Pt40 | 8.323892 | 4.805801 | 0.000000 |
| Pt41 | 9.710928 | 8.976772 | 2.311185 |
| Pt42 | 6.93763  | 8.97508  | 2.311407 |
| Pt43 | 5.531672 | 1.762948 | 2.310016 |
| Pt44 | 5.549616 | 6.571336 | 2.311741 |
| Pt45 | 8.318326 | 1.764709 | 2.308361 |
| Pt46 | 6.930236 | 4.165855 | 2.310194 |
| Pt47 | 9.710339 | 4.16849  | 2.311881 |
| Pt48 | 8.323958 | 6.572242 | 2.311968 |
| Pt49 | 9.709679 | 5.962626 | 4.590768 |
| Pt50 | 6.939524 | 5.963215 | 4.589528 |
| Pt51 | 5.553451 | 8.368994 | 4.591285 |
| Pt52 | 5.545881 | 3.561028 | 4.588951 |
| Pt53 | 6.932597 | 1.160701 | 4.583099 |
| Pt54 | 9.708711 | 1.15855  | 4.586332 |
| Pt55 | 8.320939 | 3.561341 | 4.586614 |
| Pt56 | 8.324667 | 8.369254 | 4.591161 |
| Pt57 | 5.552909 | 0.525827 | 6.899505 |
| Pt58 | 9.708698 | 2.922192 | 6.899837 |

| ARTICLE |          |          | Journal Name |
|---------|----------|----------|--------------|
| Pt59    | 6.940686 | 2.928432 | 6.900007     |
| Pt60    | 5.557677 | 5.334076 | 6.905584     |
| Pt61    | 6.939175 | 7.73094  | 6.905317     |
| Pt62    | 9.709134 | 7.729796 | 6.904289     |
| Pt63    | 8.318458 | 0.519415 | 6.893516     |
| Pt64    | 8.325494 | 5.326495 | 6.906732     |
| Pt65    | 11.09852 | 0.000000 | 0.000000     |
| Pt66    | 15.26047 | 2.4029   | 0.000000     |
| Pt67    | 12.48584 | 2.4029   | 0.000000     |
| Pt68    | 11.09852 | 4.805801 | 0.000000     |
| Pt69    | 12.48584 | 7.208701 | 0.000000     |
| Pt70    | 15.26047 | 7.208701 | 0.000000     |
| Pt71    | 13.87315 | 0.000000 | 0.000000     |
| Pt72    | 13.87315 | 4.805801 | 0.000000     |
| Pt73    | 15.25984 | 8.972549 | 2.313688     |
| Pt74    | 12.48441 | 8.975381 | 2.311569     |
| Pt75    | 11.10349 | 1.765766 | 2.308431     |
| Pt76    | 11.09819 | 6.572206 | 2.312937     |
| Pt77    | 13.88972 | 1.762227 | 2.308664     |
| Pt78    | 12.49079 | 4.166121 | 2.310949     |
| Pt79    | 15.2691  | 4.162092 | 2.309782     |
| Pt80    | 13.87151 | 6.57023  | 2.311504     |
| Pt81    | 15.25511 | 5.963544 | 4.586357     |
| Pt82    | 12.48108 | 5.965217 | 4.59088      |
| Pt83    | 11.0944  | 8.370131 | 4.59117      |
| Pt84    | 11.09736 | 3.562834 | 4.586941     |
| Pt85    | 12.48426 | 1.163194 | 4.581515     |
| Pt86    | 15.26329 | 1.160505 | 4.580097     |
| Pt87    | 13.87226 | 3.56165  | 4.590314     |
| Pt88    | 13.86684 | 8.36919  | 4.591096     |
| Pt89    | 11.09899 | 0.521877 | 6.895462     |
| Pt90    | 15.24306 | 2.941983 | 6.909873     |
| Pt91    | 12.4757  | 2.928946 | 6.900474     |
| Pt92    | 11.09148 | 5.326901 | 6.906859     |
| Pt93    | 12.47891 | 7.730326 | 6.905394     |
| Pt94    | 15.25302 | 7.731146 | 6.901069     |
| Pt95    | 13.86092 | 0.527926 | 6.896322     |



|       |          |          |          |
|-------|----------|----------|----------|
| Pt96  | 13.86171 | 5.336978 | 6.906756 |
| Pt97  | 16.64778 | 0.000000 | 0.000000 |
| Pt98  | 20.80973 | 2.4029   | 0.000000 |
| Pt99  | 18.0351  | 2.4029   | 0.000000 |
| Pt100 | 16.64778 | 4.805801 | 0.000000 |
| Pt101 | 18.0351  | 7.208701 | 0.000000 |
| Pt102 | 20.80973 | 7.208701 | 0.000000 |
| Pt103 | 19.42241 | 0.000000 | 0.000000 |
| Pt104 | 19.42241 | 4.805801 | 0.000000 |
| Pt105 | 20.8093  | 8.969342 | 2.31272  |
| Pt106 | 18.03382 | 8.971529 | 2.313758 |
| Pt107 | 16.66673 | 1.762301 | 2.327907 |
| Pt108 | 16.64767 | 6.569124 | 2.310039 |
| Pt109 | 19.42569 | 1.755583 | 2.341394 |
| Pt110 | 18.04288 | 4.162562 | 2.309033 |
| Pt111 | 20.80643 | 4.16022  | 2.311134 |
| Pt112 | 19.42177 | 6.569109 | 2.313293 |
| Pt113 | 20.8082  | 5.966446 | 4.592991 |
| Pt114 | 18.02955 | 5.966813 | 4.58959  |
| Pt115 | 16.64277 | 8.369139 | 4.592954 |
| Pt116 | 16.64727 | 3.555728 | 4.590106 |
| Pt117 | 18.07404 | 1.155575 | 4.663895 |
| Pt118 | 20.79915 | 1.160558 | 4.663095 |
| Pt119 | 19.4162  | 3.571725 | 4.599898 |
| Pt120 | 19.41928 | 8.366569 | 4.594328 |
| Pt121 | 16.58552 | 0.530249 | 6.90013  |
| Pt122 | 20.80815 | 2.99043  | 6.903558 |
| Pt123 | 18.00687 | 2.981087 | 6.925874 |
| Pt124 | 16.63672 | 5.341282 | 6.902623 |
| Pt125 | 18.02768 | 7.741903 | 6.906696 |
| Pt126 | 20.80663 | 7.742815 | 6.909239 |
| Pt127 | 19.35144 | 0.570504 | 7.014978 |
| Pt128 | 19.41556 | 5.360411 | 6.913084 |
| Pt129 | 0.000000 | 9.611602 | 0.000000 |
| Pt130 | 4.161946 | 12.0145  | 0.000000 |
| Pt131 | 1.387315 | 12.0145  | 0.000000 |
| Pt132 | 0.000000 | 14.4174  | 0.000000 |

| ARTICLE |          |          | Journal Name |
|---------|----------|----------|--------------|
| Pt133   | 1.387315 | 16.8203  | 0.000000     |
| Pt134   | 4.161946 | 16.8203  | 0.000000     |
| Pt135   | 2.774631 | 9.611602 | 0.000000     |
| Pt136   | 2.774631 | 14.4174  | 0.000000     |
| Pt137   | 4.15671  | 18.58424 | 2.311567     |
| Pt138   | 1.383683 | 18.59107 | 2.321964     |
| Pt139   | 0.000912 | 11.37406 | 2.310939     |
| Pt140   | 0.00297  | 16.19123 | 2.30245      |
| Pt141   | 2.775042 | 11.3759  | 2.313516     |
| Pt142   | 1.38761  | 13.78176 | 2.312345     |
| Pt143   | 4.159787 | 13.78072 | 2.311424     |
| Pt144   | 2.774573 | 16.18708 | 2.312903     |
| Pt145   | 4.161024 | 15.57611 | 4.5922       |
| Pt146   | 1.385879 | 15.57308 | 4.587838     |
| Pt147   | 0.005397 | 17.97738 | 4.597744     |
| Pt148   | 0.001274 | 13.16211 | 4.590568     |
| Pt149   | 1.389407 | 10.7666  | 4.593643     |
| Pt150   | 4.162131 | 10.77132 | 4.593472     |
| Pt151   | 2.77334  | 13.17266 | 4.592583     |
| Pt152   | 2.778594 | 17.98281 | 4.598438     |
| Pt153   | 22.19413 | 10.1347  | 6.906183     |
| Pt154   | 4.163249 | 12.53617 | 6.907306     |
| Pt155   | 1.388092 | 12.53682 | 6.90643      |
| Pt156   | 0.00437  | 14.91895 | 6.903196     |
| Pt157   | 1.404554 | 17.32285 | 6.904577     |
| Pt158   | 4.166554 | 17.33365 | 6.912991     |
| Pt159   | 2.775743 | 10.13504 | 6.905186     |
| Pt160   | 2.781588 | 14.93132 | 6.907864     |
| Pt161   | 5.549261 | 9.611602 | 0.000000     |
| Pt162   | 9.711207 | 12.0145  | 0.000000     |
| Pt163   | 6.936576 | 12.0145  | 0.000000     |
| Pt164   | 5.549261 | 14.4174  | 0.000000     |
| Pt165   | 6.936576 | 16.8203  | 0.000000     |
| Pt166   | 9.711207 | 16.8203  | 0.000000     |
| Pt167   | 8.323892 | 9.611602 | 0.000000     |
| Pt168   | 8.323892 | 14.4174  | 0.000000     |
| Pt169   | 9.711184 | 18.58907 | 2.31293      |

|       |          |          |          |
|-------|----------|----------|----------|
| Pt170 | 6.932166 | 18.58557 | 2.310815 |
| Pt171 | 5.547503 | 11.37824 | 2.314432 |
| Pt172 | 5.548929 | 16.18399 | 2.312975 |
| Pt173 | 8.322155 | 11.37997 | 2.31142  |
| Pt174 | 6.933615 | 13.78038 | 2.31282  |
| Pt175 | 9.710172 | 13.78152 | 2.313802 |
| Pt176 | 8.323947 | 16.18456 | 2.313383 |
| Pt177 | 9.7116   | 15.57778 | 4.593324 |
| Pt178 | 6.934245 | 15.57684 | 4.590836 |
| Pt179 | 5.544726 | 17.98119 | 4.593209 |
| Pt180 | 5.545535 | 13.17615 | 4.594056 |
| Pt181 | 6.934876 | 10.77352 | 4.590085 |
| Pt182 | 9.708902 | 10.7737  | 4.591765 |
| Pt183 | 8.320718 | 13.17525 | 4.591079 |
| Pt184 | 8.320843 | 17.97851 | 4.587934 |
| Pt185 | 5.551117 | 10.13394 | 6.90445  |
| Pt186 | 9.709705 | 12.543   | 6.901656 |
| Pt187 | 6.938256 | 12.53732 | 6.905125 |
| Pt188 | 5.551113 | 14.94073 | 6.909343 |
| Pt189 | 6.939068 | 17.33829 | 6.901968 |
| Pt190 | 9.709984 | 17.34834 | 6.903573 |
| Pt191 | 8.321076 | 10.1354  | 6.902553 |
| Pt192 | 8.321472 | 14.94018 | 6.903808 |
| Pt193 | 11.09852 | 9.611602 | 0.000000 |
| Pt194 | 15.26047 | 12.0145  | 0.000000 |
| Pt195 | 12.48584 | 12.0145  | 0.000000 |
| Pt196 | 11.09852 | 14.4174  | 0.000000 |
| Pt197 | 12.48584 | 16.8203  | 0.000000 |
| Pt198 | 15.26047 | 16.8203  | 0.000000 |
| Pt199 | 13.87315 | 9.611602 | 0.000000 |
| Pt200 | 13.87315 | 14.4174  | 0.000000 |
| Pt201 | 15.26522 | 18.58407 | 2.308728 |
| Pt202 | 12.48956 | 18.58572 | 2.310448 |
| Pt203 | 11.09853 | 11.38039 | 2.312371 |
| Pt204 | 11.09767 | 16.18514 | 2.31325  |
| Pt205 | 13.87288 | 11.37786 | 2.314543 |
| Pt206 | 12.4867  | 13.78079 | 2.313138 |

| ARTICLE |          |          | Journal Name |
|---------|----------|----------|--------------|
| Pt207   | 15.25965 | 13.78009 | 2.311723     |
| Pt208   | 13.87318 | 16.18386 | 2.312808     |
| Pt209   | 15.2601  | 15.57453 | 4.593156     |
| Pt210   | 12.487   | 15.57626 | 4.59016      |
| Pt211   | 11.10013 | 17.98094 | 4.589006     |
| Pt212   | 11.09826 | 13.17564 | 4.591843     |
| Pt213   | 12.48235 | 10.77405 | 4.590352     |
| Pt214   | 15.25665 | 10.77017 | 4.593651     |
| Pt215   | 13.87359 | 13.17445 | 4.595345     |
| Pt216   | 13.8749  | 17.98101 | 4.591062     |
| Pt217   | 11.09754 | 10.13531 | 6.904263     |
| Pt218   | 15.25742 | 12.53697 | 6.906625     |
| Pt219   | 12.48101 | 12.53617 | 6.906621     |
| Pt220   | 11.09985 | 14.94019 | 6.905034     |
| Pt221   | 12.47911 | 17.33735 | 6.901        |
| Pt222   | 15.24838 | 17.33667 | 6.910605     |
| Pt223   | 13.86629 | 10.13444 | 6.903284     |
| Pt224   | 13.86795 | 14.94043 | 6.90952      |
| Pt225   | 16.64778 | 9.611602 | 0.000000     |
| Pt226   | 20.80973 | 12.0145  | 0.000000     |
| Pt227   | 18.0351  | 12.0145  | 0.000000     |
| Pt228   | 16.64778 | 14.4174  | 0.000000     |
| Pt229   | 18.0351  | 16.8203  | 0.000000     |
| Pt230   | 20.80973 | 16.8203  | 0.000000     |
| Pt231   | 19.42241 | 9.611602 | 0.000000     |
| Pt232   | 19.42241 | 14.4174  | 0.000000     |
| Pt233   | 20.80917 | 18.59062 | 2.328539     |
| Pt234   | 18.03891 | 18.59284 | 2.32539      |
| Pt235   | 16.64628 | 11.37568 | 2.313529     |
| Pt236   | 16.64665 | 16.18721 | 2.311974     |
| Pt237   | 19.42043 | 11.3742  | 2.310742     |
| Pt238   | 18.03394 | 13.78231 | 2.312957     |
| Pt239   | 20.80965 | 13.78308 | 2.313949     |
| Pt240   | 19.41861 | 16.19221 | 2.300118     |
| Pt241   | 20.80883 | 15.55854 | 4.56238      |
| Pt242   | 18.03592 | 15.57183 | 4.583974     |
| Pt243   | 16.64159 | 17.98321 | 4.592061     |

|       |          |          |          |
|-------|----------|----------|----------|
| Pt244 | 16.64656 | 13.17126 | 4.59179  |
| Pt245 | 18.03084 | 10.76686 | 4.592943 |
| Pt246 | 20.80896 | 10.7635  | 4.589731 |
| Pt247 | 19.42008 | 13.16161 | 4.591506 |
| Pt248 | 19.4177  | 17.97903 | 4.60189  |
| Pt249 | 16.64484 | 10.1359  | 6.90595  |
| Pt250 | 20.80847 | 12.5267  | 6.907081 |
| Pt251 | 18.03208 | 12.53564 | 6.907813 |
| Pt252 | 16.63871 | 14.92798 | 6.906686 |
| Pt253 | 18.01332 | 17.31429 | 6.884556 |
| Pt254 | 20.81757 | 17.26966 | 6.831068 |
| Pt255 | 19.42116 | 10.13673 | 6.907145 |
| Pt256 | 19.41813 | 14.92148 | 6.90262  |

**Table S10.** Atomic coordinates (cartesian; Å) of the diamino-triazine/Pt(111) structure shown in Fig. 8(b)

| Atom label | X [Å]    | Y [Å]    | Z [Å]    |
|------------|----------|----------|----------|
| N1         | 21.14361 | 18.35278 | 10.67111 |
| N2         | 19.65528 | 0.24182  | 9.175271 |
| N3         | 18.80011 | 18.17442 | 11.00141 |
| N4         | 21.99516 | 0.618364 | 9.097229 |
| N5         | 17.42162 | 0.401184 | 9.861097 |
| C1         | 20.88247 | 19.1796  | 9.671002 |
| C2         | 18.62677 | 19.08162 | 10.01211 |
| C3         | 20.04688 | 17.79865 | 11.22916 |
| H1         | 21.89656 | 1.645509 | 9.145535 |
| H2         | 17.22094 | 1.019637 | 9.059724 |
| H3         | 0.655471 | 0.307714 | 9.567522 |
| H4         | 16.6472  | 19.21238 | 10.37413 |
| H5         | 20.21117 | 16.99799 | 11.95515 |
| Pt1        | 0.000000 | 0.000000 | 0.000000 |
| Pt2        | 4.161946 | 2.4029   | 0.000000 |
| Pt3        | 1.387315 | 2.4029   | 0.000000 |
| Pt4        | 0.000000 | 4.805801 | 0.000000 |
| Pt5        | 1.387315 | 7.208701 | 0.000000 |
| Pt6        | 4.161946 | 7.208701 | 0.000000 |
| Pt7        | 2.774631 | 0.000000 | 0.000000 |
| Pt8        | 2.774631 | 4.805801 | 0.000000 |
| Pt9        | 4.161607 | 8.973641 | 2.314051 |
| Pt10       | 1.387276 | 8.96964  | 2.312789 |
| Pt11       | 22.18621 | 1.754106 | 2.331303 |
| Pt12       | 22.19424 | 6.567214 | 2.312964 |
| Pt13       | 2.756244 | 1.761431 | 2.323521 |
| Pt14       | 1.374555 | 4.160211 | 2.30889  |
| Pt15       | 4.152489 | 4.162587 | 2.306909 |
| Pt16       | 2.77312  | 6.567607 | 2.309282 |
| Pt17       | 4.166345 | 5.963433 | 4.586543 |
| Pt18       | 1.390329 | 5.961623 | 4.586821 |
| Pt19       | 0.001696 | 8.364557 | 4.593062 |
| Pt20       | 22.1943  | 3.565205 | 4.595144 |
| Pt21       | 1.354921 | 1.149082 | 4.631542 |

|      |          |          |          |
|------|----------|----------|----------|
| Pt22 | 4.154419 | 1.159984 | 4.583868 |
| Pt23 | 2.773352 | 3.555196 | 4.583747 |
| Pt24 | 2.77919  | 8.366852 | 4.591493 |
| Pt25 | 0.058507 | 0.527368 | 6.944976 |
| Pt26 | 4.171741 | 2.93365  | 6.905716 |
| Pt27 | 1.408622 | 2.968089 | 6.910282 |
| Pt28 | 0.002961 | 5.353741 | 6.909079 |
| Pt29 | 1.391471 | 7.738006 | 6.90168  |
| Pt30 | 4.166603 | 7.72775  | 6.903143 |
| Pt31 | 2.81978  | 0.519877 | 6.909206 |
| Pt32 | 2.779848 | 5.336411 | 6.898938 |
| Pt33 | 5.549261 | 0.000000 | 0.000000 |
| Pt34 | 9.711207 | 2.4029   | 0.000000 |
| Pt35 | 6.936576 | 2.4029   | 0.000000 |
| Pt36 | 5.549261 | 4.805801 | 0.000000 |
| Pt37 | 6.936576 | 7.208701 | 0.000000 |
| Pt38 | 9.711207 | 7.208701 | 0.000000 |
| Pt39 | 8.323892 | 0.000000 | 0.000000 |
| Pt40 | 8.323892 | 4.805801 | 0.000000 |
| Pt41 | 9.710993 | 8.975938 | 2.310653 |
| Pt42 | 6.93718  | 8.97518  | 2.310921 |
| Pt43 | 5.532113 | 1.762093 | 2.309329 |
| Pt44 | 5.549776 | 6.571271 | 2.312257 |
| Pt45 | 8.318233 | 1.763573 | 2.307642 |
| Pt46 | 6.931075 | 4.165476 | 2.310336 |
| Pt47 | 9.710205 | 4.167129 | 2.311224 |
| Pt48 | 8.324136 | 6.571507 | 2.311716 |
| Pt49 | 9.710301 | 5.961061 | 4.589697 |
| Pt50 | 6.939701 | 5.962895 | 4.589171 |
| Pt51 | 5.553566 | 8.369003 | 4.591165 |
| Pt52 | 5.546295 | 3.56067  | 4.588435 |
| Pt53 | 6.932249 | 1.159962 | 4.581861 |
| Pt54 | 9.710079 | 1.157859 | 4.585608 |
| Pt55 | 8.321166 | 3.55966  | 4.586592 |
| Pt56 | 8.325143 | 8.368473 | 4.590372 |
| Pt57 | 5.553126 | 0.525438 | 6.899735 |
| Pt58 | 9.70906  | 2.922588 | 6.899328 |

## ARTICLE

## Journal Name

|      |          |          |          |
|------|----------|----------|----------|
| Pt59 | 6.94053  | 2.926772 | 6.900467 |
| Pt60 | 5.556982 | 5.331881 | 6.904699 |
| Pt61 | 6.939025 | 7.729295 | 6.904634 |
| Pt62 | 9.709081 | 7.729136 | 6.903291 |
| Pt63 | 8.319135 | 0.518738 | 6.891096 |
| Pt64 | 8.325621 | 5.326498 | 6.905332 |
| Pt65 | 11.09852 | 0.000000 | 0.000000 |
| Pt66 | 15.26047 | 2.4029   | 0.000000 |
| Pt67 | 12.48584 | 2.4029   | 0.000000 |
| Pt68 | 11.09852 | 4.805801 | 0.000000 |
| Pt69 | 12.48584 | 7.208701 | 0.000000 |
| Pt70 | 15.26047 | 7.208701 | 0.000000 |
| Pt71 | 13.87315 | 0.000000 | 0.000000 |
| Pt72 | 13.87315 | 4.805801 | 0.000000 |
| Pt73 | 15.26065 | 8.972006 | 2.31282  |
| Pt74 | 12.485   | 8.975319 | 2.311653 |
| Pt75 | 11.10372 | 1.76488  | 2.30748  |
| Pt76 | 11.09806 | 6.571383 | 2.3126   |
| Pt77 | 13.8931  | 1.761944 | 2.307675 |
| Pt78 | 12.49174 | 4.164871 | 2.310251 |
| Pt79 | 15.27113 | 4.15869  | 2.309698 |
| Pt80 | 13.87114 | 6.569604 | 2.311381 |
| Pt81 | 15.2548  | 5.961303 | 4.586101 |
| Pt82 | 12.48179 | 5.964364 | 4.590143 |
| Pt83 | 11.09535 | 8.369437 | 4.590915 |
| Pt84 | 11.09805 | 3.561439 | 4.586165 |
| Pt85 | 12.48602 | 1.164168 | 4.578208 |
| Pt86 | 15.26544 | 1.160786 | 4.576871 |
| Pt87 | 13.87364 | 3.561339 | 4.591356 |
| Pt88 | 13.86788 | 8.36872  | 4.59057  |
| Pt89 | 11.10071 | 0.52191  | 6.894424 |
| Pt90 | 15.24244 | 2.938221 | 6.911777 |
| Pt91 | 12.47587 | 2.927009 | 6.901248 |
| Pt92 | 11.09221 | 5.325533 | 6.905883 |
| Pt93 | 12.47904 | 7.728902 | 6.904969 |
| Pt94 | 15.25323 | 7.730428 | 6.900114 |
| Pt95 | 13.85778 | 0.526402 | 6.896245 |



|       |          |          |          |
|-------|----------|----------|----------|
| Pt96  | 13.8625  | 5.336047 | 6.907225 |
| Pt97  | 16.64778 | 0.000000 | 0.000000 |
| Pt98  | 20.80973 | 2.4029   | 0.000000 |
| Pt99  | 18.0351  | 2.4029   | 0.000000 |
| Pt100 | 16.64778 | 4.805801 | 0.000000 |
| Pt101 | 18.0351  | 7.208701 | 0.000000 |
| Pt102 | 20.80973 | 7.208701 | 0.000000 |
| Pt103 | 19.42241 | 0.000000 | 0.000000 |
| Pt104 | 19.42241 | 4.805801 | 0.000000 |
| Pt105 | 20.80966 | 8.970343 | 2.31335  |
| Pt106 | 18.0354  | 8.971372 | 2.313353 |
| Pt107 | 16.67479 | 1.758302 | 2.332111 |
| Pt108 | 16.64646 | 6.566912 | 2.309165 |
| Pt109 | 19.42822 | 1.755009 | 2.346567 |
| Pt110 | 18.04302 | 4.161162 | 2.309018 |
| Pt111 | 20.80606 | 4.159435 | 2.308685 |
| Pt112 | 19.42129 | 6.568979 | 2.312873 |
| Pt113 | 20.80747 | 5.966284 | 4.591236 |
| Pt114 | 18.02885 | 5.964763 | 4.588431 |
| Pt115 | 16.64377 | 8.366194 | 4.590666 |
| Pt116 | 16.64899 | 3.551688 | 4.592707 |
| Pt117 | 18.08617 | 1.154252 | 4.683324 |
| Pt118 | 20.80268 | 1.161547 | 4.67365  |
| Pt119 | 19.41649 | 3.572083 | 4.599474 |
| Pt120 | 19.42018 | 8.366438 | 4.594033 |
| Pt121 | 16.58258 | 0.509493 | 6.877375 |
| Pt122 | 20.80704 | 2.991526 | 6.905879 |
| Pt123 | 18.00938 | 2.980784 | 6.932709 |
| Pt124 | 16.63644 | 5.337775 | 6.902006 |
| Pt125 | 18.02807 | 7.740112 | 6.904948 |
| Pt126 | 20.80734 | 7.741171 | 6.907499 |
| Pt127 | 19.36368 | 0.577364 | 7.079425 |
| Pt128 | 19.41612 | 5.360478 | 6.911955 |
| Pt129 | 0.000000 | 9.611602 | 0.000000 |
| Pt130 | 4.161946 | 12.0145  | 0.000000 |
| Pt131 | 1.387315 | 12.0145  | 0.000000 |
| Pt132 | 0.000000 | 14.4174  | 0.000000 |

## ARTICLE

## Journal Name

|       |          |          |          |
|-------|----------|----------|----------|
| Pt133 | 1.387315 | 16.8203  | 0.000000 |
| Pt134 | 4.161946 | 16.8203  | 0.000000 |
| Pt135 | 2.774631 | 9.611602 | 0.000000 |
| Pt136 | 2.774631 | 14.4174  | 0.000000 |
| Pt137 | 4.155372 | 18.583   | 2.310733 |
| Pt138 | 1.380852 | 18.58921 | 2.324595 |
| Pt139 | 0.001135 | 11.37523 | 2.310769 |
| Pt140 | 0.000882 | 16.19198 | 2.307114 |
| Pt141 | 2.775113 | 11.37545 | 2.312963 |
| Pt142 | 1.387273 | 13.78218 | 2.311623 |
| Pt143 | 4.160028 | 13.78062 | 2.31146  |
| Pt144 | 2.773733 | 16.18659 | 2.313501 |
| Pt145 | 4.162507 | 15.57513 | 4.592498 |
| Pt146 | 1.386086 | 15.57162 | 4.588644 |
| Pt147 | 0.003866 | 17.97473 | 4.615053 |
| Pt148 | 22.19704 | 13.1659  | 4.588881 |
| Pt149 | 1.388888 | 10.76579 | 4.591393 |
| Pt150 | 4.162813 | 10.77135 | 4.592576 |
| Pt151 | 2.773159 | 13.17196 | 4.591171 |
| Pt152 | 2.777981 | 17.97784 | 4.598591 |
| Pt153 | 22.19502 | 10.13317 | 6.904168 |
| Pt154 | 4.162906 | 12.53559 | 6.9061   |
| Pt155 | 1.389004 | 12.53568 | 6.903669 |
| Pt156 | 0.003945 | 14.92173 | 6.902293 |
| Pt157 | 1.406344 | 17.31525 | 6.910903 |
| Pt158 | 4.169118 | 17.33229 | 6.913804 |
| Pt159 | 2.776074 | 10.13492 | 6.904057 |
| Pt160 | 2.782916 | 14.9303  | 6.907288 |
| Pt161 | 5.549261 | 9.611602 | 0.000000 |
| Pt162 | 9.711207 | 12.0145  | 0.000000 |
| Pt163 | 6.936576 | 12.0145  | 0.000000 |
| Pt164 | 5.549261 | 14.4174  | 0.000000 |
| Pt165 | 6.936576 | 16.8203  | 0.000000 |
| Pt166 | 9.711207 | 16.8203  | 0.000000 |
| Pt167 | 8.323892 | 9.611602 | 0.000000 |
| Pt168 | 8.323892 | 14.4174  | 0.000000 |
| Pt169 | 9.711634 | 18.58889 | 2.312178 |

|       |          |          |          |
|-------|----------|----------|----------|
| Pt170 | 6.931501 | 18.58479 | 2.310582 |
| Pt171 | 5.547873 | 11.37845 | 2.314378 |
| Pt172 | 5.549117 | 16.18353 | 2.3128   |
| Pt173 | 8.322508 | 11.3797  | 2.311141 |
| Pt174 | 6.934201 | 13.78031 | 2.312987 |
| Pt175 | 9.710457 | 13.78139 | 2.313799 |
| Pt176 | 8.32419  | 16.18472 | 2.312602 |
| Pt177 | 9.711882 | 15.57626 | 4.592704 |
| Pt178 | 6.935759 | 15.57583 | 4.590656 |
| Pt179 | 5.544807 | 17.98091 | 4.593166 |
| Pt180 | 5.545873 | 13.17611 | 4.59432  |
| Pt181 | 6.934705 | 10.77344 | 4.590445 |
| Pt182 | 9.70847  | 10.77237 | 4.591392 |
| Pt183 | 8.321358 | 13.17447 | 4.591567 |
| Pt184 | 8.321041 | 17.97826 | 4.586407 |
| Pt185 | 5.551215 | 10.13275 | 6.904094 |
| Pt186 | 9.710363 | 12.54122 | 6.90304  |
| Pt187 | 6.938804 | 12.53696 | 6.905344 |
| Pt188 | 5.553175 | 14.93932 | 6.909418 |
| Pt189 | 6.940016 | 17.33844 | 6.901405 |
| Pt190 | 9.710348 | 17.34735 | 6.899872 |
| Pt191 | 8.320816 | 10.13423 | 6.902769 |
| Pt192 | 8.322313 | 14.93941 | 6.904472 |
| Pt193 | 11.09852 | 9.611602 | 0.000000 |
| Pt194 | 15.26047 | 12.0145  | 0.000000 |
| Pt195 | 12.48584 | 12.0145  | 0.000000 |
| Pt196 | 11.09852 | 14.4174  | 0.000000 |
| Pt197 | 12.48584 | 16.8203  | 0.000000 |
| Pt198 | 15.26047 | 16.8203  | 0.000000 |
| Pt199 | 13.87315 | 9.611602 | 0.000000 |
| Pt200 | 13.87315 | 14.4174  | 0.000000 |
| Pt201 | 15.26901 | 18.58326 | 2.308796 |
| Pt202 | 12.49155 | 18.58609 | 2.309382 |
| Pt203 | 11.09898 | 11.37967 | 2.312757 |
| Pt204 | 11.0974  | 16.18524 | 2.313009 |
| Pt205 | 13.87328 | 11.37729 | 2.314697 |
| Pt206 | 12.48657 | 13.78063 | 2.313206 |

| ARTICLE |          |          | Journal Name |
|---------|----------|----------|--------------|
| Pt207   | 15.25938 | 13.7797  | 2.311064     |
| Pt208   | 13.87286 | 16.18421 | 2.312346     |
| Pt209   | 15.25894 | 15.57293 | 4.591332     |
| Pt210   | 12.4869  | 15.57617 | 4.589862     |
| Pt211   | 11.10162 | 17.98111 | 4.587466     |
| Pt212   | 11.09834 | 13.17401 | 4.59228      |
| Pt213   | 12.48342 | 10.77353 | 4.590757     |
| Pt214   | 15.25801 | 10.76823 | 4.592061     |
| Pt215   | 13.87291 | 13.17394 | 4.595115     |
| Pt216   | 13.87754 | 17.98181 | 4.590935     |
| Pt217   | 11.09745 | 10.13356 | 6.903278     |
| Pt218   | 15.25836 | 12.53707 | 6.905543     |
| Pt219   | 12.48144 | 12.53491 | 6.906925     |
| Pt220   | 11.10046 | 14.93892 | 6.904556     |
| Pt221   | 12.4804  | 17.3362  | 6.89974      |
| Pt222   | 15.25311 | 17.33015 | 6.909509     |
| Pt223   | 13.86798 | 10.13425 | 6.902658     |
| Pt224   | 13.86844 | 14.93932 | 6.90936      |
| Pt225   | 16.64778 | 9.611602 | 0.000000     |
| Pt226   | 20.80973 | 12.0145  | 0.000000     |
| Pt227   | 18.0351  | 12.0145  | 0.000000     |
| Pt228   | 16.64778 | 14.4174  | 0.000000     |
| Pt229   | 18.0351  | 16.8203  | 0.000000     |
| Pt230   | 20.80973 | 16.8203  | 0.000000     |
| Pt231   | 19.42241 | 9.611602 | 0.000000     |
| Pt232   | 19.42241 | 14.4174  | 0.000000     |
| Pt233   | 20.80952 | 18.59144 | 2.339694     |
| Pt234   | 18.04528 | 18.59248 | 2.33144      |
| Pt235   | 16.64715 | 11.37507 | 2.312819     |
| Pt236   | 16.64762 | 16.18642 | 2.311272     |
| Pt237   | 19.42178 | 11.37582 | 2.310695     |
| Pt238   | 18.03426 | 13.78308 | 2.312267     |
| Pt239   | 20.80878 | 13.78585 | 2.313897     |
| Pt240   | 19.42043 | 16.1946  | 2.305707     |
| Pt241   | 20.80824 | 15.56994 | 4.573574     |
| Pt242   | 18.03589 | 15.57285 | 4.585098     |
| Pt243   | 16.64745 | 17.97715 | 4.590141     |

|       |          |          |          |
|-------|----------|----------|----------|
| Pt244 | 16.64675 | 13.16977 | 4.589353 |
| Pt245 | 18.03265 | 10.7667  | 4.591267 |
| Pt246 | 20.80924 | 10.76563 | 4.589134 |
| Pt247 | 19.42002 | 13.16737 | 4.589922 |
| Pt248 | 19.4224  | 17.98566 | 4.625687 |
| Pt249 | 16.64526 | 10.13341 | 6.903808 |
| Pt250 | 20.80882 | 12.52801 | 6.901182 |
| Pt251 | 18.03226 | 12.53447 | 6.903755 |
| Pt252 | 16.63986 | 14.92643 | 6.905183 |
| Pt253 | 18.02312 | 17.31694 | 6.893778 |
| Pt254 | 20.81023 | 17.28483 | 6.875721 |
| Pt255 | 19.42177 | 10.13662 | 6.905937 |
| Pt256 | 19.41895 | 14.92685 | 6.901448 |

**Table S11.** Atomic coordinates (cartesian; Å) of the amino-triazine/Pt(111) structure shown in Fig. 8(c)

| Atom label | X [Å]    | Y [Å]    | Z [Å]    |
|------------|----------|----------|----------|
| N1         | 21.11244 | 18.40974 | 10.69366 |
| N2         | 19.61592 | 0.077919 | 9.073682 |
| N3         | 18.80149 | 17.84954 | 10.77347 |
| N4         | 21.87693 | 0.762181 | 9.152683 |
| C1         | 20.83511 | 19.21329 | 9.667524 |
| C2         | 18.61399 | 18.64671 | 9.727797 |
| C3         | 20.07626 | 17.70935 | 11.16737 |
| H1         | 21.63055 | 1.759412 | 9.015029 |
| H2         | 0.538444 | 0.638774 | 9.697672 |
| H3         | 17.60379 | 18.80629 | 9.341709 |
| H4         | 20.28579 | 16.98258 | 11.95633 |
| Pt1        | 0.000000 | 0.000000 | 0.000000 |
| Pt2        | 4.161946 | 2.4029   | 0.000000 |
| Pt3        | 1.387315 | 2.4029   | 0.000000 |
| Pt4        | 0.000000 | 4.805801 | 0.000000 |
| Pt5        | 1.387315 | 7.208701 | 0.000000 |
| Pt6        | 4.161946 | 7.208701 | 0.000000 |
| Pt7        | 2.774631 | 0.000000 | 0.000000 |
| Pt8        | 2.774631 | 4.805801 | 0.000000 |
| Pt9        | 4.161964 | 8.974292 | 2.313444 |
| Pt10       | 1.387738 | 8.971813 | 2.31321  |
| Pt11       | 22.18432 | 1.755468 | 2.327726 |
| Pt12       | 22.1954  | 6.56859  | 2.312699 |
| Pt13       | 2.755908 | 1.762209 | 2.326536 |
| Pt14       | 1.375917 | 4.161357 | 2.308568 |
| Pt15       | 4.153672 | 4.163211 | 2.307682 |
| Pt16       | 2.774053 | 6.568846 | 2.309674 |
| Pt17       | 4.167289 | 5.964333 | 4.587055 |
| Pt18       | 1.391895 | 5.962848 | 4.586732 |
| Pt19       | 0.002787 | 8.365341 | 4.593011 |
| Pt20       | 0.000591 | 3.564222 | 4.592689 |
| Pt21       | 1.359319 | 1.149348 | 4.626709 |
| Pt22       | 4.155883 | 1.161672 | 4.587055 |
| Pt23       | 2.775291 | 3.556548 | 4.585664 |

|      |          |          |          |
|------|----------|----------|----------|
| Pt24 | 2.779967 | 8.367968 | 4.59133  |
| Pt25 | 0.077423 | 0.543089 | 6.94252  |
| Pt26 | 4.176401 | 2.937794 | 6.908304 |
| Pt27 | 1.413069 | 2.971624 | 6.91162  |
| Pt28 | 0.007653 | 5.356025 | 6.910111 |
| Pt29 | 1.393077 | 7.73799  | 6.901714 |
| Pt30 | 4.169668 | 7.729842 | 6.902332 |
| Pt31 | 2.822998 | 0.526476 | 6.917837 |
| Pt32 | 2.784469 | 5.338628 | 6.900474 |
| Pt33 | 5.549261 | 0.000000 | 0.000000 |
| Pt34 | 9.711207 | 2.4029   | 0.000000 |
| Pt35 | 6.936576 | 2.4029   | 0.000000 |
| Pt36 | 5.549261 | 4.805801 | 0.000000 |
| Pt37 | 6.936576 | 7.208701 | 0.000000 |
| Pt38 | 9.711207 | 7.208701 | 0.000000 |
| Pt39 | 8.323892 | 0.000000 | 0.000000 |
| Pt40 | 8.323892 | 4.805801 | 0.000000 |
| Pt41 | 9.711029 | 8.976199 | 2.310848 |
| Pt42 | 6.937823 | 8.975063 | 2.310908 |
| Pt43 | 5.534047 | 1.762248 | 2.310566 |
| Pt44 | 5.550183 | 6.571389 | 2.312121 |
| Pt45 | 8.321029 | 1.764407 | 2.308716 |
| Pt46 | 6.931997 | 4.165585 | 2.310739 |
| Pt47 | 9.712011 | 4.168176 | 2.311634 |
| Pt48 | 8.324597 | 6.571562 | 2.311527 |
| Pt49 | 9.709963 | 5.962818 | 4.590983 |
| Pt50 | 6.939995 | 5.963357 | 4.589456 |
| Pt51 | 5.554909 | 8.369732 | 4.590341 |
| Pt52 | 5.548259 | 3.561609 | 4.589235 |
| Pt53 | 6.934836 | 1.160788 | 4.583487 |
| Pt54 | 9.712206 | 1.158834 | 4.586083 |
| Pt55 | 8.323083 | 3.561112 | 4.58705  |
| Pt56 | 8.32628  | 8.369239 | 4.590804 |
| Pt57 | 5.555024 | 0.526291 | 6.898797 |
| Pt58 | 9.71077  | 2.922207 | 6.900381 |
| Pt59 | 6.94336  | 2.929137 | 6.901286 |
| Pt60 | 5.559742 | 5.334669 | 6.906779 |

## ARTICLE

## Journal Name

|      |          |          |          |
|------|----------|----------|----------|
| Pt61 | 6.94191  | 7.730581 | 6.904824 |
| Pt62 | 9.710695 | 7.730597 | 6.904494 |
| Pt63 | 8.321407 | 0.521183 | 6.893064 |
| Pt64 | 8.326831 | 5.327926 | 6.906646 |
| Pt65 | 11.09852 | 0.000000 | 0.000000 |
| Pt66 | 15.26047 | 2.4029   | 0.000000 |
| Pt67 | 12.48584 | 2.4029   | 0.000000 |
| Pt68 | 11.09852 | 4.805801 | 0.000000 |
| Pt69 | 12.48584 | 7.208701 | 0.000000 |
| Pt70 | 15.26047 | 7.208701 | 0.000000 |
| Pt71 | 13.87315 | 0.000000 | 0.000000 |
| Pt72 | 13.87315 | 4.805801 | 0.000000 |
| Pt73 | 15.26047 | 8.972427 | 2.313456 |
| Pt74 | 12.48535 | 8.975367 | 2.311504 |
| Pt75 | 11.10633 | 1.765336 | 2.308727 |
| Pt76 | 11.09843 | 6.571662 | 2.31327  |
| Pt77 | 13.89381 | 1.760804 | 2.308913 |
| Pt78 | 12.49304 | 4.165309 | 2.310306 |
| Pt79 | 15.27127 | 4.160044 | 2.309076 |
| Pt80 | 13.87123 | 6.569869 | 2.311039 |
| Pt81 | 15.25521 | 5.962795 | 4.585398 |
| Pt82 | 12.48138 | 5.964334 | 4.590108 |
| Pt83 | 11.09562 | 8.369695 | 4.591086 |
| Pt84 | 11.09912 | 3.562505 | 4.586983 |
| Pt85 | 12.48831 | 1.163515 | 4.581314 |
| Pt86 | 15.26762 | 1.158377 | 4.583131 |
| Pt87 | 13.8748  | 3.560632 | 4.590095 |
| Pt88 | 13.86794 | 8.368294 | 4.59078  |
| Pt89 | 11.10231 | 0.522251 | 6.894987 |
| Pt90 | 15.24572 | 2.938374 | 6.909658 |
| Pt91 | 12.47749 | 2.929326 | 6.900833 |
| Pt92 | 11.09369 | 5.326736 | 6.905995 |
| Pt93 | 12.48026 | 7.729634 | 6.904978 |
| Pt94 | 15.25504 | 7.729651 | 6.900983 |
| Pt95 | 13.86273 | 0.526134 | 6.898362 |
| Pt96 | 13.86479 | 5.335314 | 6.904807 |
| Pt97 | 16.64778 | 0        | 0        |



|       |          |          |          |
|-------|----------|----------|----------|
| Pt98  | 20.80973 | 2.4029   | 0.000000 |
| Pt99  | 18.0351  | 2.4029   | 0.000000 |
| Pt100 | 16.64778 | 4.805801 | 0.000000 |
| Pt101 | 18.0351  | 7.208701 | 0.000000 |
| Pt102 | 20.80973 | 7.208701 | 0.000000 |
| Pt103 | 19.42241 | 0.000000 | 0.000000 |
| Pt104 | 19.42241 | 4.805801 | 0.000000 |
| Pt105 | 20.80966 | 8.970559 | 2.31292  |
| Pt106 | 18.03472 | 8.97111  | 2.313209 |
| Pt107 | 16.67131 | 1.760267 | 2.331538 |
| Pt108 | 16.6472  | 6.567733 | 2.3095   |
| Pt109 | 19.42615 | 1.754887 | 2.3474   |
| Pt110 | 18.04295 | 4.161788 | 2.307568 |
| Pt111 | 20.80608 | 4.160828 | 2.309727 |
| Pt112 | 19.42212 | 6.569374 | 2.312964 |
| Pt113 | 20.80988 | 5.965742 | 4.591595 |
| Pt114 | 18.03027 | 5.965715 | 4.588071 |
| Pt115 | 16.64403 | 8.36714  | 4.591921 |
| Pt116 | 16.64941 | 3.553073 | 4.590926 |
| Pt117 | 18.08056 | 1.153345 | 4.683748 |
| Pt118 | 20.80105 | 1.160206 | 4.668184 |
| Pt119 | 19.41588 | 3.5718   | 4.597727 |
| Pt120 | 19.42144 | 8.365949 | 4.593595 |
| Pt121 | 16.58796 | 0.526017 | 6.907427 |
| Pt122 | 20.81244 | 2.994247 | 6.90079  |
| Pt123 | 18.01333 | 2.972845 | 6.927388 |
| Pt124 | 16.63957 | 5.337795 | 6.899361 |
| Pt125 | 18.02978 | 7.740033 | 6.904767 |
| Pt126 | 20.80998 | 7.741281 | 6.906942 |
| Pt127 | 19.36431 | 0.550183 | 7.046954 |
| Pt128 | 19.41843 | 5.357047 | 6.910207 |
| Pt129 | 0.000000 | 9.611602 | 0.000000 |
| Pt130 | 4.161946 | 12.0145  | 0.000000 |
| Pt131 | 1.387315 | 12.0145  | 0.000000 |
| Pt132 | 0.000000 | 14.4174  | 0.000000 |
| Pt133 | 1.387315 | 16.8203  | 0.000000 |
| Pt134 | 4.161946 | 16.8203  | 0.000000 |

| ARTICLE |          |          | Journal Name |
|---------|----------|----------|--------------|
| Pt135   | 2.774631 | 9.611602 | 0.000000     |
| Pt136   | 2.774631 | 14.4174  | 0.000000     |
| Pt137   | 4.156363 | 18.58394 | 2.311624     |
| Pt138   | 1.38194  | 18.58915 | 2.322975     |
| Pt139   | 0.002115 | 11.37503 | 2.310952     |
| Pt140   | 0.001828 | 16.19205 | 2.306864     |
| Pt141   | 2.776041 | 11.37641 | 2.313116     |
| Pt142   | 1.388776 | 13.78267 | 2.311527     |
| Pt143   | 4.161599 | 13.78108 | 2.312043     |
| Pt144   | 2.774175 | 16.18666 | 2.313557     |
| Pt145   | 4.162283 | 15.57566 | 4.592321     |
| Pt146   | 1.386972 | 15.57444 | 4.590265     |
| Pt147   | 0.005718 | 17.97804 | 4.609755     |
| Pt148   | 0.001837 | 13.16529 | 4.588214     |
| Pt149   | 1.39076  | 10.76699 | 4.592426     |
| Pt150   | 4.164906 | 10.77199 | 4.591947     |
| Pt151   | 2.774193 | 13.17319 | 4.591679     |
| Pt152   | 2.778856 | 17.98083 | 4.600039     |
| Pt153   | 22.19601 | 10.13426 | 6.90488      |
| Pt154   | 4.164628 | 12.53706 | 6.906323     |
| Pt155   | 1.390138 | 12.53648 | 6.903278     |
| Pt156   | 0.006801 | 14.92232 | 6.901203     |
| Pt157   | 1.407723 | 17.32608 | 6.914698     |
| Pt158   | 4.17041  | 17.33457 | 6.912253     |
| Pt159   | 2.778896 | 10.1348  | 6.90259      |
| Pt160   | 2.783718 | 14.93322 | 6.908075     |
| Pt161   | 5.549261 | 9.611602 | 0.000000     |
| Pt162   | 9.711207 | 12.0145  | 0.000000     |
| Pt163   | 6.936576 | 12.0145  | 0.000000     |
| Pt164   | 5.549261 | 14.4174  | 0.000000     |
| Pt165   | 6.936576 | 16.8203  | 0.000000     |
| Pt166   | 9.711207 | 16.8203  | 0.000000     |
| Pt167   | 8.323892 | 9.611602 | 0.000000     |
| Pt168   | 8.323892 | 14.4174  | 0.000000     |
| Pt169   | 9.711968 | 18.58916 | 2.312719     |
| Pt170   | 6.932294 | 18.58553 | 2.310714     |
| Pt171   | 5.548746 | 11.37894 | 2.314424     |

|       |          |          |          |
|-------|----------|----------|----------|
| Pt172 | 5.549405 | 16.18359 | 2.312897 |
| Pt173 | 8.32415  | 11.37964 | 2.310606 |
| Pt174 | 6.935892 | 13.78021 | 2.313606 |
| Pt175 | 9.711853 | 13.78165 | 2.313551 |
| Pt176 | 8.324247 | 16.18479 | 2.313129 |
| Pt177 | 9.713081 | 15.5779  | 4.592682 |
| Pt178 | 6.936377 | 15.5761  | 4.590791 |
| Pt179 | 5.546034 | 17.98086 | 4.59238  |
| Pt180 | 5.547895 | 13.17599 | 4.594819 |
| Pt181 | 6.938546 | 10.7736  | 4.589108 |
| Pt182 | 9.712869 | 10.77348 | 4.591474 |
| Pt183 | 8.32407  | 13.17472 | 4.591513 |
| Pt184 | 8.322498 | 17.97924 | 4.587083 |
| Pt185 | 5.554144 | 10.13441 | 6.90263  |
| Pt186 | 9.711447 | 12.54328 | 6.902569 |
| Pt187 | 6.939798 | 12.53816 | 6.905292 |
| Pt188 | 5.553387 | 14.94079 | 6.909376 |
| Pt189 | 6.941378 | 17.34049 | 6.900845 |
| Pt190 | 9.71119  | 17.34852 | 6.901573 |
| Pt191 | 8.323214 | 10.13688 | 6.902384 |
| Pt192 | 8.323744 | 14.94106 | 6.904176 |
| Pt193 | 11.09852 | 9.611602 | 0.000000 |
| Pt194 | 15.26047 | 12.0145  | 0.000000 |
| Pt195 | 12.48584 | 12.0145  | 0.000000 |
| Pt196 | 11.09852 | 14.4174  | 0.000000 |
| Pt197 | 12.48584 | 16.8203  | 0.000000 |
| Pt198 | 15.26047 | 16.8203  | 0.000000 |
| Pt199 | 13.87315 | 9.611602 | 0.000000 |
| Pt200 | 13.87315 | 14.4174  | 0.000000 |
| Pt201 | 15.26775 | 18.58378 | 2.3098   |
| Pt202 | 12.49135 | 18.58607 | 2.309735 |
| Pt203 | 11.10015 | 11.38006 | 2.312479 |
| Pt204 | 11.09799 | 16.1857  | 2.31299  |
| Pt205 | 13.87411 | 11.37806 | 2.314261 |
| Pt206 | 12.48766 | 13.78108 | 2.312823 |
| Pt207 | 15.26056 | 13.78043 | 2.311091 |
| Pt208 | 13.87347 | 16.18455 | 2.312703 |

| ARTICLE |          |          | Journal Name |
|---------|----------|----------|--------------|
| Pt209   | 15.26009 | 15.57492 | 4.593098     |
| Pt210   | 12.48753 | 15.57667 | 4.589993     |
| Pt211   | 11.10271 | 17.98204 | 4.588458     |
| Pt212   | 11.10111 | 13.17514 | 4.592027     |
| Pt213   | 12.48573 | 10.77318 | 4.590895     |
| Pt214   | 15.25917 | 10.76904 | 4.592844     |
| Pt215   | 13.87482 | 13.17442 | 4.594189     |
| Pt216   | 13.87778 | 17.98154 | 4.591711     |
| Pt217   | 11.09946 | 10.13509 | 6.904443     |
| Pt218   | 15.2579  | 12.53654 | 6.905565     |
| Pt219   | 12.48349 | 12.53659 | 6.907503     |
| Pt220   | 11.10081 | 14.9401  | 6.904966     |
| Pt221   | 12.48167 | 17.3367  | 6.900291     |
| Pt222   | 15.25307 | 17.33554 | 6.913025     |
| Pt223   | 13.86827 | 10.13355 | 6.903208     |
| Pt224   | 13.8689  | 14.93957 | 6.908999     |
| Pt225   | 16.64778 | 9.611602 | 0.000000     |
| Pt226   | 20.80973 | 12.0145  | 0.000000     |
| Pt227   | 18.0351  | 12.0145  | 0.000000     |
| Pt228   | 16.64778 | 14.4174  | 0.000000     |
| Pt229   | 18.0351  | 16.8203  | 0.000000     |
| Pt230   | 20.80973 | 16.8203  | 0.000000     |
| Pt231   | 19.42241 | 9.611602 | 0.000000     |
| Pt232   | 19.42241 | 14.4174  | 0.000000     |
| Pt233   | 20.80957 | 18.59093 | 2.333794     |
| Pt234   | 18.04146 | 18.59348 | 2.331196     |
| Pt235   | 16.64789 | 11.37523 | 2.312984     |
| Pt236   | 16.64672 | 16.18796 | 2.312397     |
| Pt237   | 19.42218 | 11.37518 | 2.310663     |
| Pt238   | 18.03491 | 13.7831  | 2.312182     |
| Pt239   | 20.81047 | 13.78432 | 2.313445     |
| Pt240   | 19.42027 | 16.19359 | 2.303315     |
| Pt241   | 20.80919 | 15.56404 | 4.569058     |
| Pt242   | 18.03609 | 15.57152 | 4.583121     |
| Pt243   | 16.64608 | 17.98229 | 4.596286     |
| Pt244   | 16.64703 | 13.17025 | 4.589514     |
| Pt245   | 18.03343 | 10.76619 | 4.591321     |

|       |          |          |          |
|-------|----------|----------|----------|
| Pt246 | 20.81082 | 10.76426 | 4.588669 |
| Pt247 | 19.42082 | 13.16411 | 4.58967  |
| Pt248 | 19.42206 | 17.9801  | 4.614056 |
| Pt249 | 16.64661 | 10.1344  | 6.904634 |
| Pt250 | 20.811   | 12.52643 | 6.901941 |
| Pt251 | 18.03312 | 12.53357 | 6.903808 |
| Pt252 | 16.6407  | 14.92573 | 6.905116 |
| Pt253 | 18.01714 | 17.30429 | 6.890402 |
| Pt254 | 20.82017 | 17.2769  | 6.857469 |
| Pt255 | 19.42291 | 10.13602 | 6.90605  |
| Pt256 | 19.42124 | 14.92109 | 6.901226 |
